# Supplementary material
Source: publisher figshare collection journal article supplement (https://acs.figshare.com/ndownloader/files/4529293)

**Supporting Information:**

**Ni-Catalyzed Sonogashira Coupling of Non-activated Alkyl Halides: Orthogonal  
Functionalization of Alkyl Iodides, Bromides, and Chlorides**

Oleg Vechorkin, Delphine Barmaz, Valérie Proust, and Xile Hu\*

*Laboratory of Inorganic Synthesis and Catalysis, Institute of Chemical Sciences and  
Engineering, Ecole Polytechnique Fédérale de Lausanne (EPFL), ISIC-LSCI, BCH 3305,  
Lausanne, CH 1015, Switzerland. E-mail: [xile.hu@epfl.ch](mailto:xile.hu@epfl.ch)*

## Chemicals and Reagents

All manipulations were carried out under an inert N<sub>2</sub>(g) atmosphere using glovebox techniques. Solvents were purified using a two-column solid-state purification system (Innovative Technology, NJ, USA) and transferred to the glove box without exposure to air. Deuterated solvents were purchased from Cambridge Isotope Laboratories, Inc., and were degassed and stored over activated 3 Å molecular sieves. Unless noted, all other reagents were purchased from commercial sources and used without further purification. Liquid compounds were degassed by standard freeze-pump-thaw procedures prior to use in the glovebox. Complex [(<sup>Me</sup>NN<sub>2</sub>)NiCl] and [(<sup>Me</sup>NN<sub>2</sub>)<sub>2</sub>Li<sub>2</sub>] was prepared as described previously.<sup>1</sup> The following starting materials were prepared according to literature procedures: ethyl 4-iodobutanoate (table 1, entry 4) from ethyl 4-chlorobutanoate and NaI in acetone by a standard method, N,N-diethyl-6-iodohexanamide (table 1, entry 5) from 6-bromo-N,N-diethylhexanamide<sup>2</sup> and NaI in acetone by a standard method, 1-[1-(3-iodopropyl)-1*H*-pyrrol-2-yl]ethanone (table 1, entry 6),<sup>3</sup> 2-(3-iodopropyl)furan (table 1, entry 7),<sup>4</sup> 6-chlorohexyl benzoate (table 2, entry 4),<sup>5</sup> 1-chloro-4-(2-chloroethyl)benzene (table 2, entry 14),<sup>6</sup> 9-(3-chloropropyl)-9*H*-carbazole (table 2, entry 12).<sup>7</sup> In two step reactions the first steps in Eq. 2-4 were done according to procedure described in our previous work.<sup>8,9</sup>

## Physical methods

---

<sup>1</sup> Z. Csok, O. Vechorkin, S. B. Harkins, R. Scopelliti, X. L. Hu, *J. Am. Chem. Soc.* **2008**, *130*, 8156-8157.

<sup>2</sup> J. Zhou, F. C. Fu, *J. Am. Chem. Soc.* **2003**, *125*(41), 12527-12530.

<sup>3</sup> D. R. Artis, I. Cho, S. Jaime-Figueroa, J. M. Muchowski, *J. Org. Chem.* **1994**, *59* (9), 2456-2466.

<sup>4</sup> G. Gomez, H. Rivera, I. Garcia, L. Estevez, Y. Fall, *Tetrahedron Letters* **2005**, *46*(35), 5819-5822.

<sup>5</sup> Ian H. Gilbert et al., *J. Med. Chem.* **2006**, *49*, 4183-4195.

<sup>6</sup> M. Yus et al., *Journal of Organometallic Chemistry* **2002**, *663*, 21-31.

<sup>7</sup> J. W. Hulshof et al., *Bioorg. Med. Chem.* **2006**, *14*, 7213-7230.

<sup>8</sup> O. Vechorkin, X. L. Hu, *Angew. Chem. Int. Ed.* **2009**, *48*, 2937-2940.

<sup>9</sup> O. Vechorkin, V. Proust, and X. L. Hu, *J. Am. Chem. Soc.* **2009**, *131*, 9756-9766.

The  $^1\text{H}$  and  $^{13}\text{C}$  NMR spectra were recorded at 293 K on a Bruker Avance 400 spectrometer.  $^1\text{H}$  NMR chemical shifts were referenced to residual solvent as determined relative to  $\text{Me}_4\text{Si}$  ( $\delta = 0$  ppm). The  $^{13}\text{C}\{^1\text{H}\}$  chemical shifts were reported in ppm relative to the carbon resonance of  $\text{CDCl}_3$  (77.00 ppm). GC-MS measurements were conducted on a Perkin-Elmer Clarus 600 GC equipped with Clarus 600T MS. GC measurement was conducted on a Perkin-Elmer Clarus 400 GC with a FID detector. HRESI-MS measurements were conducted at the EPFL ISIC Mass Spectrometry Service at Micro Mass QTOF Ultima. Elemental analyses were performed on a Carlo Erba EA 1110 CHN instrument at EPFL. The temperature of reactions below room temperature was regulated by a Julabo FT-902 chiller.

**Figure S1.** A possible catalytic cycle for the Sonogashira reactions.

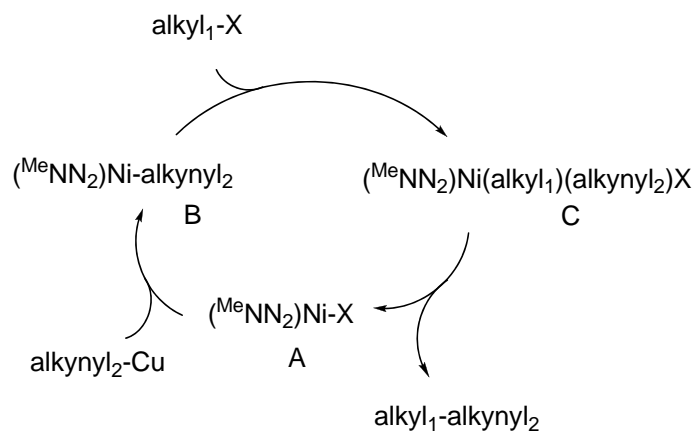

**Note:** There might be additional steps going from C to A and the coupling product, as suggested for our previously reported Ni-catalyzed Kumada-Corriu-Tamao coupling with sp<sup>2</sup>-Grignard reagents (JACS, 2009, 131, 9756-9766). The formal oxidation state of C is Ni<sup>IV</sup>, but it might also be a Ni<sup>III</sup>-ligand radical. Alternative pathways exist and more detailed study is warranted.



## Synthesis of substrates

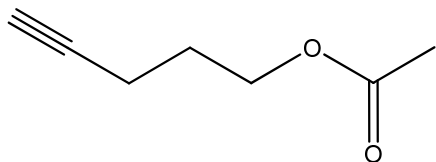

### pent-4-ynyl acetate

This compound was synthesized according to a general method described in the literature<sup>10</sup> starting from pent-4-yn-1-ol and acetic anhydride.

**<sup>1</sup>H NMR** (400MHz, CDCl<sub>3</sub>): 4.16 (t, *J* = 6.2 Hz, 2H), 2.29 (td, *J*<sub>1</sub> = 7.0 Hz, *J*<sub>2</sub> = 2.6 Hz, 2H), 2.05 (s, 3H), 1.97 (t, *J* = 2.6 Hz, 1H), 1.85 (m, 2H).

**<sup>13</sup>C NMR** (100 MHz, CDCl<sub>3</sub>): 170.9, 82.9, 68.9, 62.8, 27.4, 20.8, 15.1.

**HRCI-MS**: calculated for (C<sub>7</sub>H<sub>11</sub>O<sub>2</sub>, M+H), 127.0759; found, 127.0755.

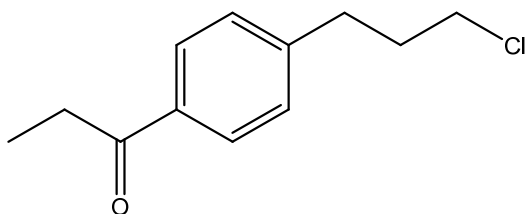

### 1-(4-(3-chloropropyl)phenyl)propan-1-one

This compound was synthesized by the same way as 1-(4-(2-chloroethyl)phenyl)propan-1-one<sup>11</sup> from (3-chloropropyl)benzene and propionyl chloride.

<sup>10</sup> B. C. Ranu, S. S. Dey and A. Hajra, *Green Chemistry*, **2003**, 5, 44-46.

<sup>11</sup> Lowe et al., *Journal of Medicinal Chemistry* **1991**, Vol. 34, No. 6, 1860-1866.

**<sup>1</sup>H NMR** (400MHz, CDCl<sub>3</sub>): 7.90 (d, *J* = 8.2 Hz, 2H), 7.28 (d, *J* = 8.5 Hz, 2H), 3.52 (t, *J* = 6.5 Hz, 2H), 2.98 (q, *J* = 7.3 Hz, 2H), 2.83 (t, *J* = 7.3 Hz, 2H), 2.09 (m, 2H), 1.21 (t, *J* = 7.3 Hz, 3H).

**<sup>13</sup>C NMR** (100 MHz, CDCl<sub>3</sub>): 200.3, 146.1, 135.0, 128.6, 128.2, 43.9, 33.5, 32.6, 31.6, 8.2.

**HRCI-MS:** calculated for (C<sub>12</sub>H<sub>16</sub>ClO, M+H), 211.0890; found, 211.0880.

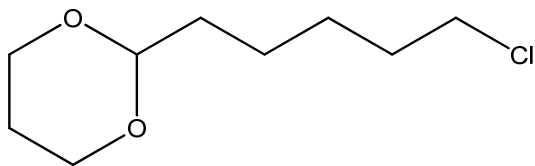

### 2-(5-chloropentyl)-1,3-dioxane

6-chlorohexanal<sup>12</sup> (5.1 g, 37.7 mmol) and propane-1,3-diol (6.0 mL, 83.02 mmol) in dry toluene (50 mL) were placed in a round-bottom flask equipped with a Dean-Stark under nitrogen. The reaction mixture was refluxed in presence of catalytic amount of TsOH·H<sub>2</sub>O (200mg) for 3h. The reaction was quenched at room temperature by the addition of aqueous saturated solution of NaHCO<sub>3</sub>. The organic layer was washed with water, dried over Na<sub>2</sub>SO<sub>4</sub> and solvent was removed in vacuum to give the desired protected aldehyde in quantitative yield.

**<sup>1</sup>H NMR** (400MHz, CDCl<sub>3</sub>): 4.50 (t, *J* = 5.3 Hz, 1H), 4.08 (dd, *J*<sub>1</sub> = 10.9 Hz, *J*<sub>2</sub> = 5.0 Hz, 2H), 3.74 (m, 2H), 3.51 (t, *J* = 6.7 Hz, 2H), 2.04 (m, 1H), 1.75 (m, 2H), 1.58 (m, 2H), 1.41 (m, 5H).

**<sup>13</sup>C NMR** (100 MHz, CDCl<sub>3</sub>): 102.0, 66.8, 44.9, 34.9, 32.4, 26.6, 25.7, 23.1.

**HRCI-MS:** calculated for (C<sub>9</sub>H<sub>18</sub>ClO<sub>2</sub>, M+H), 193.0995; found, 193.0996.

<sup>12</sup> R. J. Fox, G. Lalic and R. G. Bergman, *J. Am. Chem. Soc.* **2007**, 129, 14144-14145.

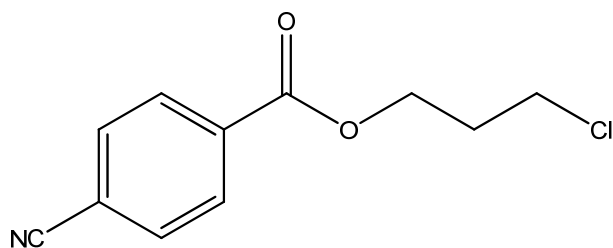

### 3-chloropropyl 4-cyanobenzoate

4-cyanobenzoyl chloride (4g, 24.1 mmol) was added slowly to a solution of 3-chloropropan-1-ol (2.04 g, 21.58 mmol) in dry pyridine (20 mL) cooled to 0°C. The reaction was stirred at 0°C for 1h and then at r.t. overnight. The crude solution was partitioned between saturated aqueous NaHCO<sub>3</sub> (60 mL) and EtOAc (50 mL). The organic layer was further washed with water (30 mL) and 1M aqueous HCl (2 x 30 mL), dried over Na<sub>2</sub>SO<sub>4</sub> and concentrated in *vacuo*. The crude product was purified by flash chromatography to give a white solid in 75% yield.

**<sup>1</sup>H NMR** (400MHz, CDCl<sub>3</sub>): 8.13 (d, *J* = 8.2 Hz, 2H), 7.74 (d, *J* = 7.9 Hz, 2H), 4.51 (t, *J* = 6.2 Hz, 2H), 3.69 (t, *J* = 6.2 Hz, 2H), 2.25 (quint, *J* = 5.9 Hz, 2H).

**<sup>13</sup>C NMR** (100 MHz, CDCl<sub>3</sub>): 164.6, 133.7, 132.1, 130.0, 117.8, 116.4, 62.4, 41.0, 31.4.

**HRCI-MS:** calculated for (C<sub>11</sub>H<sub>11</sub>ClNO<sub>2</sub>, M+H), 224.0478; found, 224.0475.

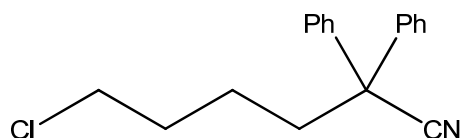

### 6-chloro-2,2-diphenylhexanenitrile

To a solution of diphenylacetonitrile (2.0 g, 10.3 mmol) in 100 ml of *N,N*-dimethylformamide was carefully added sodium hydride (0.5 g, 12.4 mmol, 60% in oil) in small portions. The mixture was stirred at ambient temperature for 15 min, and then 1-chloro-4-iodobutane (3.28 g, 15 mmol) was added in one portion. The mixture was stirred at ambient temperature. After 20 h, the reaction was quenched with 200 ml of water and extracted with two portions of ethyl acetate (200 mL). The combined organic extracts were washed with water (2 x 400 mL) and then brine (400 mL), dried over MgSO<sub>4</sub>, filtered, and concentrated *in vacuo* to yellow oil. Purification by flash column chromatography on silica gel afforded 1.9 g of 6-chloro-2,2-diphenylhexanenitrile as a viscous liquid.

**<sup>1</sup>H NMR** (400MHz, CDCl<sub>3</sub>): 7.40 (m, 8H), 7.31 (m, 2H), 3.51 (t, *J* = 6.7 Hz, 2H), 2.41 (m, 2H), 1.85 (m, 2H), 1.58 (m, 2H).

**<sup>13</sup>C NMR** (100 MHz, CDCl<sub>3</sub>): 139.9, 128.8, 127.8, 126.7, 122.1, 51.6, 44.2, 38.9, 32.2, 23.1.

**HRCI-MS:** calculated for (C<sub>18</sub>H<sub>19</sub>ClN, M+H), 284.1206; found, 284.1219.

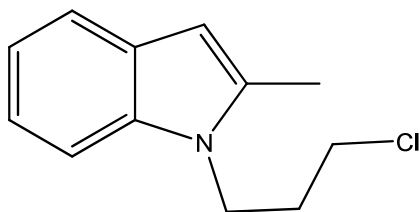

### **1-(3-chloropropyl)-2-methyl-1H-indole**

This compound was synthesized according to a general method described in the literature<sup>3</sup> starting from 2-methyl-1H-indole.

**<sup>1</sup>H NMR** (400MHz, CDCl<sub>3</sub>): 7.57 (d, *J* = 7.6 Hz, 1H), 7.35 (d, *J* = 8.2 Hz, 1H), 7.19 (m, 1H), 7.12 (m, 1H), 6.30 (s, 1H), 4.28 (t, *J* = 7.0 Hz, 2H), 3.55 (t, *J* = 6.2 Hz, 2H), 2.49 (s, 3H), 2.25 (m, 2H).

**<sup>13</sup>C NMR** (100 MHz, CDCl<sub>3</sub>): 136.5, 136.3, 128.1, 120.5, 119.7, 119.3, 108.8, 100.3, 42.0, 39.9, 32.7, 12.7.

**HRCI-MS:** calculated for (C<sub>12</sub>H<sub>15</sub>NCl, M+H), 208.0893; found, 208.0888.

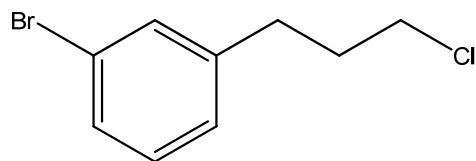

### 1-bromo-3-(3-chloropropyl)benzene

This compound was synthesized from 3-(3-bromophenyl)propan-1-ol<sup>13</sup> by the same procedure as 1-chloro-4-(2-chloroethyl)benzene.<sup>6</sup>

**<sup>1</sup>H NMR** (400MHz, CDCl<sub>3</sub>): 7.35 (m, 2H), 7.16 (m, 2H), 3.53 (t, *J* = 6.2 Hz, 2H), 2.76 (t, *J* = 7.3 Hz, 2H), 2.07 (m, 2H).

**<sup>13</sup>C NMR** (100 MHz, CDCl<sub>3</sub>): 143.0, 131.5, 130.0, 129.2, 127.2, 122.5, 43.9, 33.6, 32.3.

**Elemental analysis:** Anal. Calcd for C<sub>9</sub>H<sub>10</sub>BrCl: C, 46.29; H, 4.32. Found: C, 46.33; H, 4.45.

<sup>13</sup> A. Minami, R. Uchida, T. Eguchi and K. Kakinuma, *J. Am. Chem. Soc.* **2005**, 127, 6148-6149.

### General procedure for Sonogashira coupling

$[(^{\text{Me}}\text{NN}_2)\text{Ni-Cl}]$  (26 mg, 0.075 mmol), CuI (9 mg, 0.045mmol),  $\text{Cs}_2\text{CO}_3$  (684mg, 2.1mmol), Alkyl-X (1.5 mmol) and alkyne (1.95 mmol) were placed in a vial and 6 mL of dioxane was added. NaI (45 mg, 0.3 mmol) was added in case of Alkyl-Br or  $\text{NBu}_4\text{I}$  (120 mg, 0.3 mmol) was added in case of Alkyl-Cl. After addition the mixture was heated in absence of oxygen during 16h at 100<sup>0</sup>C for Alkyl-I and Alkyl-Br and at 140<sup>0</sup>C for Alkyl-Cl. After this time reaction was cooled to r.t., quenched with 15 mL of water and 1 mL of 1M HCl, extracted with ether (3 times, 20 mL each), dried over  $\text{Na}_2\text{SO}_4$ , filtered, and finally evaporated under a reduced pressure. The residue was purified by flash chromatography on silica-gel.

### Choice of the best conditions

**Table S1. Choice of the best conditions for Alkyl-I and control experiments<sup>a</sup>**

| Entry | CuI     | Base                     | Solvent | Cat.                                      | Temp. | Time | Yield |
|-------|---------|--------------------------|---------|-------------------------------------------|-------|------|-------|
| 1     | 7.5mol% | $\text{Cs}_2\text{CO}_3$ | NMP     | $[(^{\text{Me}}\text{NN}_2)\text{Ni-Cl}]$ | 80    | 16h  | 21    |
| 2     | 7.5mol% | $\text{Cs}_2\text{CO}_3$ | DMA     | $[(^{\text{Me}}\text{NN}_2)\text{Ni-Cl}]$ | 80    | 16h  | 36    |
| 3     | 7.5mol% | $\text{Cs}_2\text{CO}_3$ | Toluene | $[(^{\text{Me}}\text{NN}_2)\text{Ni-Cl}]$ | 80    | 16h  | 46    |
| 4     | 7.5mol% | $\text{Cs}_2\text{CO}_3$ | Dioxane | $[(^{\text{Me}}\text{NN}_2)\text{Ni-Cl}]$ | 80    | 16h  | 79    |
| 5     | 7.5mol% | $\text{K}_2\text{CO}_3$  | Dioxane | $[(^{\text{Me}}\text{NN}_2)\text{Ni-Cl}]$ | 120   | 16h  | 23    |
| 6     | 7.5mol% | $\text{Na}_2\text{CO}_3$ | Dioxane | $[(^{\text{Me}}\text{NN}_2)\text{Ni-Cl}]$ | 120   | 16h  | 10    |
| 7     | 7.5mol% | $\text{Cs}_2\text{CO}_3$ | Dioxane | $[(^{\text{Me}}\text{NN}_2)\text{Ni-Cl}]$ | 120   | 16h  | 83    |
| 8     | 7.5mol% | $\text{Cs}_2\text{CO}_3$ | Dioxane | $[(^{\text{Me}}\text{NN}_2)\text{Ni-Cl}]$ | 60    | 16h  | 67    |

|    |         |                                 |         |                                                                   |     |     |      |
|----|---------|---------------------------------|---------|-------------------------------------------------------------------|-----|-----|------|
| 9  | 7.5mol% | Cs <sub>2</sub> CO <sub>3</sub> | Dioxane | [( <sup>Me</sup> NN <sub>2</sub> )Ni-Cl]                          | 120 | 2h  | 34   |
| 10 | 7.5mol% | Cs <sub>2</sub> CO <sub>3</sub> | Dioxane | [( <sup>Me</sup> NN <sub>2</sub> )Ni-Cl]                          | 120 | 8h  | 59   |
| 11 | 3mol%   | Cs <sub>2</sub> CO <sub>3</sub> | Dioxane | [( <sup>Me</sup> NN <sub>2</sub> )Ni-Cl]                          | 100 | 16h | 75   |
| 12 | 3mol%   | Cs <sub>2</sub> CO <sub>3</sub> | Dioxane | [( <sup>Me</sup> NN <sub>2</sub> ) <sub>2</sub> Li <sub>2</sub> ] | 100 | 16h | 0    |
| 13 | 3mol%   | Cs <sub>2</sub> CO <sub>3</sub> | Dioxane | H <sup>Me</sup> NN <sub>2</sub>                                   | 100 | 16h | 0    |
| 14 | 3mol%   | Cs <sub>2</sub> CO <sub>3</sub> | Dioxane | Ni(dme)Cl <sub>2</sub>                                            | 100 | 16h | 0    |
| 15 | 3 mol%  | Cs <sub>2</sub> CO <sub>3</sub> | Dioxane | -                                                                 | 100 | 16h | 4.1  |
| 16 | -       | Cs <sub>2</sub> CO <sub>3</sub> | Dioxane | -                                                                 | 100 | 16h | 0    |
| 17 | 3 mol%  | Cs <sub>2</sub> CO <sub>3</sub> | Dioxane | [( <sup>Me</sup> NN <sub>2</sub> )Ni-Cl]                          | 100 | 16h | 12.9 |

<sup>a</sup> Reactions were performed with 0.5 mmol of octyl-I, 1.3eq. of octyne, 5mol% of cat. in absence of oxygen.

**Table S2. Choice of the best conditions for Alkyl-Br<sup>a</sup>**

| Entry | Additive | Solvent | Temp. | Yield |
|-------|----------|---------|-------|-------|
| 1     | -        | Dioxane | 120   | 0     |
| 2     | 20% NaI  | Dioxane | 120   | 79    |
| 3     | 20% NaI  | Dioxane | 100   | 78    |

<sup>a</sup> Reactions were performed with 0.5 mmol of octyl-Br, 1.3 equiv. of octyne, 5 mol% of cat [(<sup>Me</sup>NN<sub>2</sub>)Ni-Cl], 1.4 equiv. of Cs<sub>2</sub>CO<sub>3</sub>, 3 mol% of CuI in absence of oxygen.

**Table S3. Choice of the best conditions for Alkyl-Cl and control experiments<sup>a</sup>**

| Entry | Additive | Solvent | Temp. | Yield |
|-------|----------|---------|-------|-------|
|-------|----------|---------|-------|-------|

|    |                        |         |     |                   |
|----|------------------------|---------|-----|-------------------|
| 1  | 20% NaI                | Dioxane | 120 | 5                 |
| 2  | 100%NaI                | Dioxane | 120 | 5                 |
| 3  | 20% KI                 | Dioxane | 120 | 4                 |
| 4  | 20% LiI                | Dioxane | 120 | 6                 |
| 5  | 20% NBu <sub>4</sub> I | Dioxane | 120 | 39                |
| 6  | 20% NBu <sub>4</sub> I | Dioxane | 100 | 35                |
| 7  | 20% NBu <sub>4</sub> I | Dioxane | 140 | 76                |
| 8  | 20% NBu <sub>4</sub> I | Dioxane | 140 | 3.1 <sup>b</sup>  |
| 9  | 20% NBu <sub>4</sub> I | Dioxane | 140 | 22.5 <sup>c</sup> |
| 10 | 20% NBu <sub>4</sub> I | Dioxane | 140 | 14 <sup>d</sup>   |

<sup>a</sup> Reactions were performed with 0.5 mmol of octyl-Cl, 1.3 equiv. of octyne, 5 mol% of cat [(<sup>Me</sup>NN<sub>2</sub>)Ni-Cl], 1.4 equiv. of Cs<sub>2</sub>CO<sub>3</sub>, 3 mol% of CuI in absence of oxygen. <sup>b</sup>Without Ni catalyst nor Cu-I. <sup>c</sup>With Ni catalyst but not Cu-I. <sup>d</sup>Without Ni catalyst but with Cu-I.



**Table S4. Sonogashira coupling of alkyl iodides and bromides, additional entries.<sup>a</sup>**

$$\text{Alkyl}^1\text{-X} + \text{C}\equiv\text{C-R}^2 \xrightarrow[\substack{\text{1.4 equiv. Cs}_2\text{CO}_3 \\ \text{dioxane} \\ 100^\circ\text{C, 16 h}}]{\substack{5 \text{ mol\% } \mathbf{1}, 3 \text{ mol\% CuI} \\ 0 \text{ or } 20 \text{ mol\% NaI}}} \text{Alkyl}^1\text{-C}\equiv\text{C-R}^2$$

X = I, Br      1.3 equiv

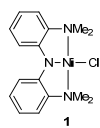

**1**

| Entry | Alkyl <sup>1</sup> -X                                                               | C≡C-R <sup>2</sup>                            | Yield<br>(%) <sup>b</sup> |
|-------|-------------------------------------------------------------------------------------|-----------------------------------------------|---------------------------|
| 1     | Octyl-I                                                                             | C≡C-Ph                                        | 69                        |
| 2     | Octyl-Br                                                                            | C≡C- <i>n</i> -C <sub>6</sub> H <sub>13</sub> | 79                        |
| 3     |    | C≡C- <i>n</i> -C <sub>6</sub> H <sub>13</sub> | 82                        |
| 4     |    | C≡C-Si( <i>i</i> -Pr) <sub>3</sub>            | 80                        |
| 5     | Octyl-Br                                                                            | C≡C- <i>n</i> -C <sub>6</sub> H <sub>13</sub> | 79                        |
| 6     |    | C≡C-CH <sub>2</sub> -Ph                       | 64                        |
| 7     |  | C≡C- <i>n</i> -C <sub>6</sub> H <sub>13</sub> | 83                        |
| 8     |  | C≡C-CH <sub>2</sub> -Ph                       | 41                        |

<sup>a</sup>For coupling of iodides, no NaI was added as additive; for coupling of bromides, 20 mol% of NaI was added as additive. <sup>b</sup>Isolated yields relative to alkyl halide.

**Substrates that cannot be coupled using the current protocols and brief comments:**

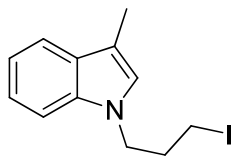

Comments: 2-H is too reactive. If the 2-position is methylated, then coupling occurs (see main text, entry 12, Table 2)

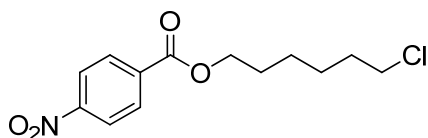

Comments: NO<sub>2</sub> group is not tolerated.

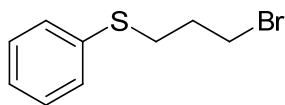

Comments: thioether group is not tolerated.

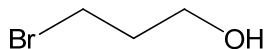

Comments: alcohol group is not tolerated.

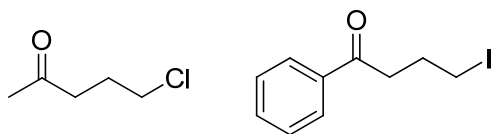

Comments: Substrates with only alkyl groups between keto and halide groups could not be coupled. However, if there is an aryl group between keto and halide groups, then coupling occurs (see entry 5, Table 2, main text).

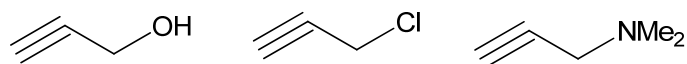

Comments: These alkyne substrates could not be coupled. Electronically they are different from normal alkynes.

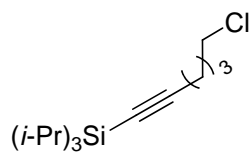

Comments: Alkyne-containing alkyl halides could not be coupled, possibly due to the formation of 5- or 6-member rings. If there are 6 CH<sub>2</sub> groups between the alkyne and Cl groups, then coupling occurs (see equation 1, main text). In that case, formation of 7- or 8-member rings are not very favorable.

### Detailed descriptions for products

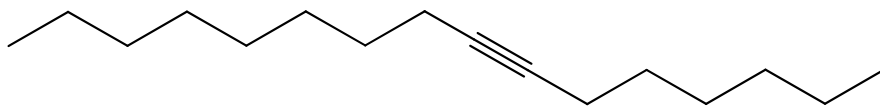

#### hexadec-7-yne (table 1, entry 1 and table 2, entry 1):<sup>14</sup>

Eluated from the column with hexane-diethyl ether (60:1) in 83% yield as a colorless liquid:

**<sup>1</sup>H NMR** (400MHz, CDCl<sub>3</sub>): 2.13 (t, *J* = 6.2 Hz, 4H), 1.47 (m, 4H), 1.22-1.40 (m, 16H), 0.89 (t, *J* = 6.2 Hz, 6H).

**<sup>13</sup>C NMR** (100 MHz, CDCl<sub>3</sub>): 80.2, 31.8, 31.3, 29.2, 29.19, 29.16, 28.8, 28.5, 22.6, 22.5, 18.7, 14.08, 14.03.

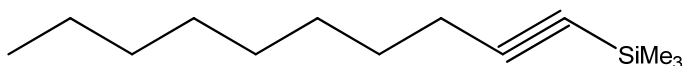

#### dec-1-ynyltrimethylsilane (table 1, entry 2) :<sup>15</sup>

Eluated from the column with hexane-diethyl ether (100:1) in 74% yield as a colorless liquid:

**<sup>1</sup>H NMR** (400MHz, CDCl<sub>3</sub>): 2.21 (t, *J* = 7.0 Hz, 2H), 1.51 (m, 2H), 1.23-1.40 (m, 10H), 0.88 (t, *J* = 6.5 Hz, 3H), 0.14 (s, 9H).

**<sup>13</sup>C NMR** (100 MHz, CDCl<sub>3</sub>): 107.7, 84.2, 31.8, 29.1, 29.0, 28.7, 28.6, 22.6, 19.8, 14.1, 0.1.

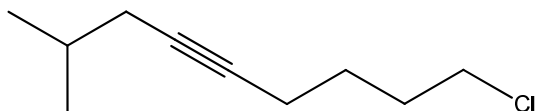

<sup>14</sup> N. Kambe et al., *Chem. Commun.* **2007**, 855–857.

<sup>15</sup> T. Stiidemann et al., *Tetrahedron* **1998**, 54, 1299-1316.

**9-chloro-2-methylnon-4-yne (table 1, entry 3):**

Eluted from the column with hexane-diethyl ether (60:1) in 84% yield as a colorless liquid:

**$^1\text{H}$  NMR** (400MHz,  $\text{CDCl}_3$ ): 3.56 (t,  $J = 6.7$  Hz, 2H), 2.21 (m, 2H), 2.03 (m, 2H), 1.89 (m, 2H), 1.75 (m, 1H), 1.63 (m, 2H), 0.95 (d,  $J = 6.7$  Hz, 6H).

**$^{13}\text{C}$  NMR** (100 MHz,  $\text{CDCl}_3$ ): 80.0, 79.8, 44.6, 31.5, 28.2, 27.9, 26.2, 21.9, 18.0.

**Elemental analysis:** Anal. Calcd for  $\text{C}_{10}\text{H}_{17}\text{Cl}$ : C, 69.55; H, 9.92. Found: C, 69.41; H, 9.96.

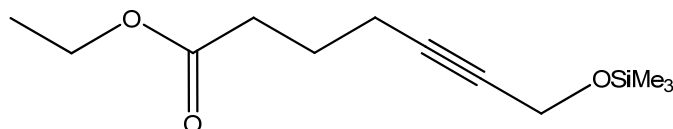

**ethyl 7-(trimethylsilyloxy)hept-5-ynoate (table 1, entry 4):**

Eluted from the column with hexane-diethyl ether (15:1) in 73% yield as a colorless liquid:

**$^1\text{H}$  NMR** (400MHz,  $\text{CDCl}_3$ ): 4.25 (t,  $J = 2.3$  Hz, 2H), 4.12 (q,  $J = 7.3$  Hz, 2H), 2.41 (t,  $J = 7.3$  Hz, 2H), 2.27 (tt,  $J_1 = 7.0$  Hz,  $J_2 = 2.1$  Hz, 2H), 1.81 (quint,  $J = 7.3$  Hz, 2H), 1.24 (t,  $J = 7.3$  Hz, 3H), 0.15 (s, 9H).

**$^{13}\text{C}$  NMR** (100 MHz,  $\text{CDCl}_3$ ): 173.0, 84.2, 79.1, 60.3, 51.1, 33.0, 23.7, 18.2, 14.1, -0.3.

**HRCI-MS:** calculated for ( $\text{C}_{12}\text{H}_{23}\text{SiO}_3$ ,  $\text{M}+\text{H}$ ), 243.1416; found, 243.1419.

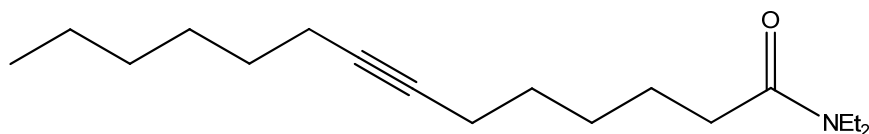

**N,N-diethyltetradec-7-ynamide (table 1, entry 5):**

Eluted from the column with hexane-diethyl ether (1:1) in 68% yield as a yellow liquid:

**<sup>1</sup>H NMR** (400MHz, CDCl<sub>3</sub>): 3.35 (q, *J* = 7.0 Hz, 2H), 3.28 (q, *J* = 7.0 Hz, 2H), 2.28 (m, 2H), 2.13 (m, 4H), 1.64 (m, 2H), 1.22-1.54 (m, 12H), 1.15 (t, *J* = 7.0 Hz, 3H), 1.09 (t, *J* = 7.3 Hz, 3H), 0.87 (t, *J* = 6.7 Hz, 3H).

**<sup>13</sup>C NMR** (100 MHz, CDCl<sub>3</sub>): 172.0, 80.3, 79.9, 41.8, 39.9, 33.0, 31.3, 29.0, 28.9, 28.7, 28.5, 25.0, 22.5, 18.7, 18.6, 14.3, 14.0, 13.0.

**HRCI-MS:** calculated for (C<sub>18</sub>H<sub>34</sub>NO, M+H), 280.2640; found, 280.2648.

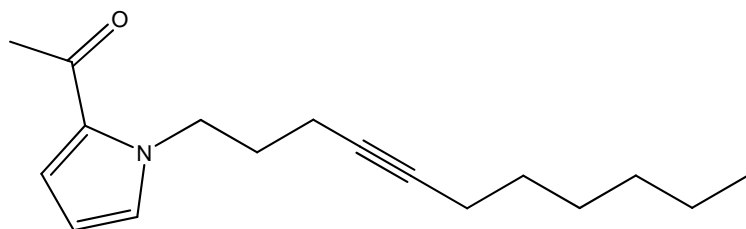

**1-(1-(undec-4-ynyl)-1H-pyrrol-2-yl)ethanone (table 1, entry 6):**

Eluted from the column with hexane-diethyl ether (20:1) in 61% yield as a colorless liquid:

**<sup>1</sup>H NMR** (400MHz, CDCl<sub>3</sub>): 6.97 (dd, *J*<sub>1</sub> = 4.1 Hz, *J*<sub>2</sub> = 1.5 Hz, 1H), 6.92 (m, 1H), 6.13 (m, 1H), 4.42 (t, *J* = 6.7 Hz, 2H), 2.43 (s, 3H), 2.17 (t, *J* = 7.3 Hz, 2H), 2.10 (t, *J* = 6.7 Hz, 2H), 1.90 (m, 2H), 1.50 (m, 2H), 1.24-1.42 (m, 6H), 0.90 (t, *J* = 6.7 Hz, 3H).

**<sup>13</sup>C NMR** (100 MHz, CDCl<sub>3</sub>): 188.0, 130.7, 129.9, 120.3, 107.7, 81.4, 78.7, 48.3, 31.3, 30.1, 29.0, 28.5, 27.2, 22.5, 18.7, 15.7, 14.0.

**HRCI-MS:** calculated for (C<sub>17</sub>H<sub>26</sub>NO, M+H), 260.2014; found, 260.1991.

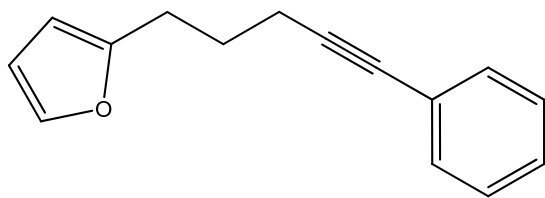

**2-(5-phenylpent-4-ynyl)furan (table 1, entry 7):**

Eluated from the column with hexane-diethyl ether (60:1) in 84% yield as a colorless liquid:

**<sup>1</sup>H NMR** (400MHz, CDCl<sub>3</sub>): 7.41 (m, 2H), 7.29 (m, 4H), 6.30 (m, 1H), 6.05 (m, 1H), 2.82 (t, *J* = 7.6 Hz, 2H), 2.47 (t, *J* = 7.0 Hz, 2H), 1.96 (quint, *J* = 7.0 Hz, 2H).

**<sup>13</sup>C NMR** (100 MHz, CDCl<sub>3</sub>): 155.3, 140.9, 131.5, 128.1, 127.5, 123.8, 110.0, 105.2, 89.4, 81.1, 27.1, 27.0, 18.8.

**HRCI-MS:** calculated for (C<sub>15</sub>H<sub>15</sub>O, M+H), 211.1123; found, 211.1124.

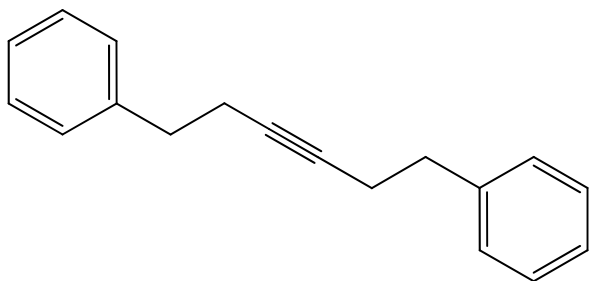

**1,6-diphenylhex-3-yne (table 1, entry 8) :<sup>16</sup>**

Eluated from the column with hexane-diethyl ether (60:1) in 89% yield as a colorless liquid:

**<sup>1</sup>H NMR** (400MHz, CDCl<sub>3</sub>): 7.32 (m, 4H), 7.23 (m, 6H), 2.81 (t, *J* = 7.3 Hz, 4H), 2.46 (t, *J* = 7.6 Hz, 4H).

---

<sup>16</sup> T. Satoh et al., *Tetrahedron* **1995**, 51(34), 9327-9338.

**$^{13}\text{C}$  NMR** (100 MHz,  $\text{CDCl}_3$ ): 140.9, 128.4, 128.2, 126.1, 80.2, 35.4, 20.9.

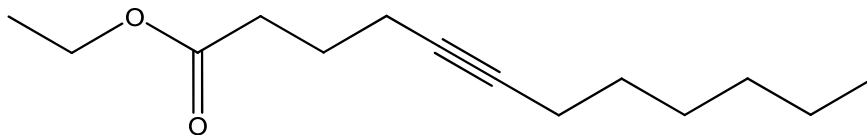

**ethyl dodec-5-ynoate (table 1, entry 9):**

Eluted from the column with hexane-diethyl ether (30:1) in 73% yield as a colorless liquid:

**$^1\text{H}$  NMR** (400MHz,  $\text{CDCl}_3$ ): 4.09 (q,  $J = 7.0$  Hz, 2H), 2.38 (t,  $J = 7.6$  Hz, 2H), 2.18 (tt,  $J_1 = 6.9$  Hz,  $J_2 = 2.4$  Hz, 2H), 2.09 (tt,  $J_1 = 6.9$  Hz,  $J_2 = 2.2$  Hz, 2H), 1.76 (quint,  $J = 7.0$  Hz, 2H), 1.43 (m, 2H), 1.27 (m, 9H), 0.85 (t,  $J = 6.7$  Hz, 3H).

**$^{13}\text{C}$  NMR** (100 MHz,  $\text{CDCl}_3$ ): 173.2, 81.1, 78.6, 60.1, 33.0, 31.2, 28.9, 28.4, 24.2, 22.4, 18.6, 18.1, 14.1, 13.9.

**HRCI-MS:** calculated for ( $\text{C}_{14}\text{H}_{25}\text{O}_2$ ,  $\text{M}+\text{H}$ ), 225.1855; found, 225.1846.

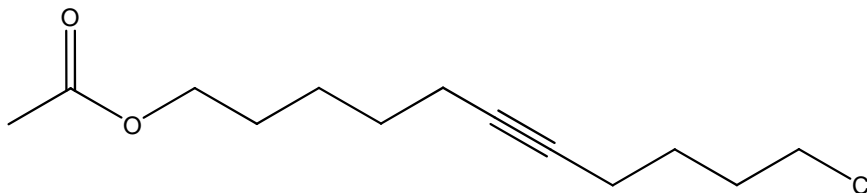

**11-chloroundec-6-ynyl acetate (table 1, entry 10):**

Eluted from the column with hexane-diethyl ether (15:1) in 70% yield as a colorless liquid:

**$^1\text{H}$  NMR** (400MHz,  $\text{CDCl}_3$ ): 4.05 (t,  $J = 7.0$  Hz, 2H), 3.55 (t,  $J = 6.7$  Hz, 2H), 2.16 (m, 4H), 2.03 (s, 3H), 1.87 (m, 2H), 1.62 (m, 4H), 1.47 (m, 4H).



**$^{13}\text{C}$  NMR** (100 MHz,  $\text{CDCl}_3$ ): 171.1, 80.4, 79.4, 64.3, 44.5, 31.5, 28.5, 28.0, 26.1, 25.0, 20.9, 18.5, 17.9.

**HRCI-MS:** calculated for ( $\text{C}_{13}\text{H}_{22}\text{ClO}_2$ ,  $\text{M}+\text{H}$ ), 245.1308; found, 245.1309.

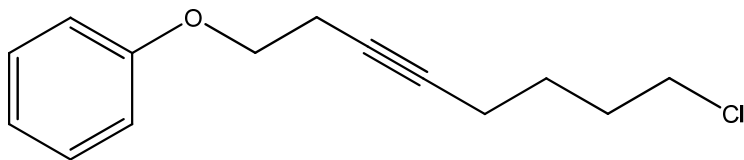

**(8-chlorooct-3-ynoxy)benzene (table 1, entry 11):**

Eluted from the column with hexane-diethyl ether (60:1) in 79% yield as a colorless liquid:

**$^1\text{H}$  NMR** (400MHz,  $\text{CDCl}_3$ ): 7.29 (t,  $J = 8.2$  Hz, 2H), 6.94 (m, 3H), 4.06 (t,  $J = 7.3$  Hz, 2H), 3.56 (t,  $J = 6.7$  Hz, 2H), 2.65 (t,  $J = 7.0$  Hz, 2H), 2.22 (t,  $J = 7.0$  Hz, 2H), 1.89 (m, 2H), 1.65 (m, 2H).

**$^{13}\text{C}$  NMR** (100 MHz,  $\text{CDCl}_3$ ): 158.4, 129.4, 120.8, 114.6, 81.0, 76.6, 66.4, 44.5, 31.5, 25.9, 19.8, 18.0.

**HRCI-MS:** calculated for ( $\text{C}_{14}\text{H}_{18}\text{ClO}$ ,  $\text{M}+\text{H}$ ), 237.1046; found, 237.1054.

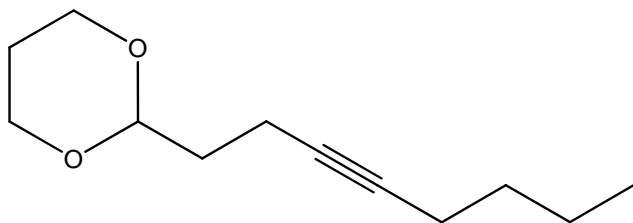

**2-(oct-3-ynyl)-1,3-dioxane (table 1, entry 12):**

Eluted from the column with hexane-diethyl ether (20:1) in 76% yield as a colorless liquid:

**$^1\text{H}$  NMR** (400MHz,  $\text{CDCl}_3$ ): 4.94 (t,  $J = 4.6$  Hz, 1H), 4.47 (dd,  $J_1 = 9.5$  Hz,  $J_2 = 4.4$  Hz, 2H), 4.17 (td,  $J_1 = 10.8$  Hz,  $J_2 = 2.1$  Hz, 2H), 2.83 (m, 2H), 2.71 (m, 3H), 2.42 (m, 2H), 2.11 (m, 5H), 1.66 (t,  $J = 6.2$  Hz, 3H).

**$^{13}\text{C}$  NMR** (100 MHz,  $\text{CDCl}_3$ ): 100.9, 80.3, 79.0, 66.8, 34.4, 31.1, 25.8, 21.8, 18.3, 13.6, 13.5.

**HRCI-MS**: calculated for ( $\text{C}_{12}\text{H}_{21}\text{O}_2$ , M+H), 197.1542; found, 197.1547.

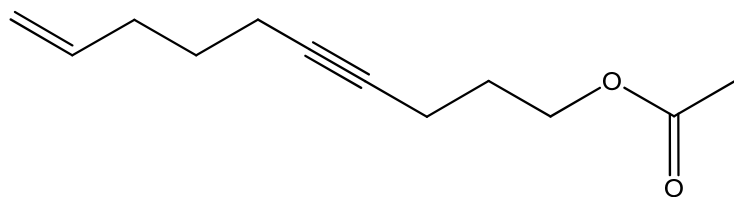

**dec-9-en-4-ynyl acetate (table 1, entry 13):**

Eluted from the column with hexane-diethyl ether (20:1) in 59% yield as a colorless liquid:

**$^1\text{H}$  NMR** (400MHz,  $\text{CDCl}_3$ ): 5.78 (m, 1H), 5.00 (m, 2H), 4.15 (t,  $J = 6.5$  Hz, 2H), 2.24 (t,  $J = 7.0$  Hz, 2H), 2.14 (m, 4H), 2.04 (s, 3H), 1.80 (m, 2H), 1.56 (m, 2H).

**$^{13}\text{C}$  NMR** (100 MHz,  $\text{CDCl}_3$ ): 171.0, 137.9, 114.9, 80.6, 78.7, 63.2, 32.7, 28.1, 28.0, 20.9, 18.0, 15.4.

**HRCI-MS**: calculated for ( $\text{C}_{12}\text{H}_{19}\text{O}_2$ , M+H), 195.1385; found, 195.1392.

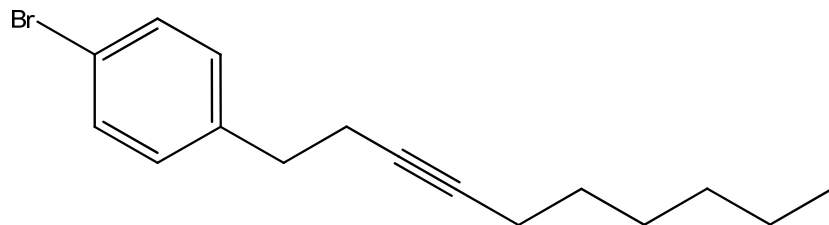

**1-bromo-4-(dec-3-ynyl)benzene (table 1, entry 14):**

Eluated from the column with hexane-diethyl ether (60:1) in 69% yield as a colorless liquid:

**<sup>1</sup>H NMR** (400MHz, CDCl<sub>3</sub>): 7.40 (d, *J* = 7.9 Hz, 2H), 7.10 (d, *J* = 8.2 Hz, 2H), 2.74 (t, *J* = 7.3 Hz, 2H), 2.42 (t, *J* = 7.0 Hz, 2H), 2.12 (t, *J* = 6.7 Hz, 2H), 1.45 (m, 2H), 1.22-1.38 (m, 6H), 0.90 (t, *J* = 6.5 Hz, 3H).

**<sup>13</sup>C NMR** (100 MHz, CDCl<sub>3</sub>): 139.8, 131.2, 130.2, 119.9, 81.4, 78.8, 34.8, 31.3, 28.9, 28.5, 22.5, 20.7, 18.6, 14.0.

**Elemental analysis:** Anal. Calcd for C<sub>16</sub>H<sub>21</sub>Br: C, 65.53; H, 7.22. Found: C, 65.44; H, 7.33.

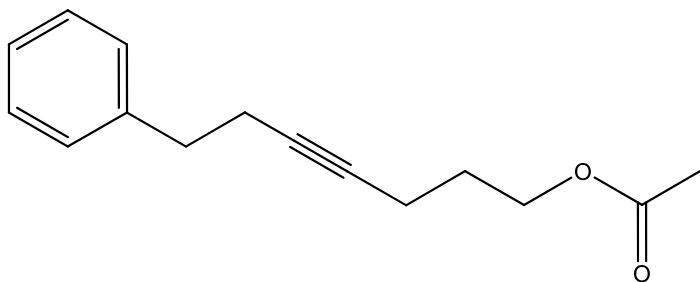

**7-phenylhept-4-ynyl acetate (table 2, entry 2):**

Eluated from the column with hexane-diethyl ether (9:1) in 66% yield as a colorless liquid:

**<sup>1</sup>H NMR** (400MHz, CDCl<sub>3</sub>): 7.26 (m, 5H), 4.12 (t, *J* = 6.5 Hz, 2H), 2.80 (t, *J* = 7.6 Hz, 2H), 2.44 (t, *J* = 7.6 Hz, 2H), 2.24 (t, *J* = 7.0 Hz, 2H), 2.05 (s, 3H), 1.78 (m, 2H).

**<sup>13</sup>C NMR** (100 MHz, CDCl<sub>3</sub>): 171.0, 140.8, 128.3, 128.2, 126.1, 80.2, 79.3, 63.1, 35.4, 27.9, 20.95, 20.91, 15.4.

**HRCI-MS:** calculated for (C<sub>15</sub>H<sub>19</sub>O<sub>2</sub>, M+H), 231.1385; found, 231.1386.

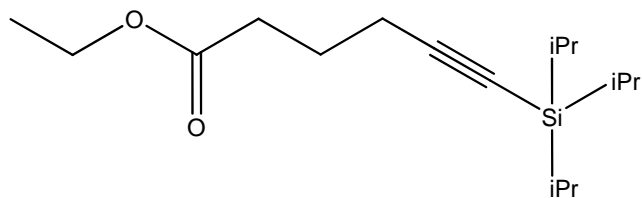

**ethyl 6-(triisopropylsilyl)hex-5-ynoate (table 2, entry 3):**

Eluated from the column with hexane-diethyl ether (30:1) in 62% yield as a colorless liquid:

**<sup>1</sup>H NMR** (400MHz, CDCl<sub>3</sub>): 4.12 (q, *J* = 7.0 Hz, 2H), 2.45 (t, *J* = 7.6 Hz, 2H), 2.32 (t, *J* = 6.5 Hz, 2H), 1.83 (m, 2H), 1.24 (t, *J* = 7.3 Hz, 3H), 1.05 (m, 21H).

**<sup>13</sup>C NMR** (100 MHz, CDCl<sub>3</sub>): 173.1, 107.6, 81.1, 60.2, 32.8, 24.0, 19.2, 18.5, 14.1, 11.2.

**HRCI-MS:** calculated for (C<sub>17</sub>H<sub>33</sub>O<sub>2</sub>Si, M+H), 297.2250; found, 297.2255.

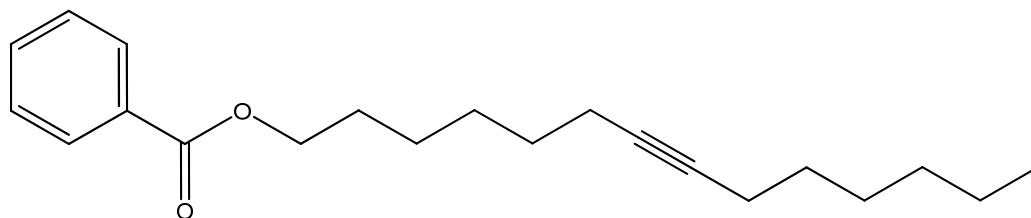

**tetradec-7-ynyl benzoate (table 2, entry 4):**

Eluated from the column with hexane-diethyl ether (30:1) in 70% yield as a slightly yellow liquid:

**<sup>1</sup>H NMR** (400MHz, CDCl<sub>3</sub>): 8.04 (d, *J* = 7.0 Hz, 2H), 7.55 (t, *J* = 7.3 Hz, 1H), 7.44 (t, *J* = 7.6 Hz, 2H), 4.32 (t, *J* = 6.7 Hz, 2H), 2.14 (m, 4H), 1.78 (m, 2H), 1.40 (m, 14H), 0.88 (t, *J* = 6.5 Hz, 3H).

**$^{13}\text{C}$  NMR** (100 MHz,  $\text{CDCl}_3$ ): 166.6, 132.7, 130.4, 129.4, 128.2, 80.4, 79.8, 65.0, 31.3, 29.1, 28.9, 28.6, 28.5, 28.4, 25.6, 22.5, 18.7, 18.6, 14.0.

**HRCI-MS:** calculated for ( $\text{C}_{21}\text{H}_{31}\text{O}_2$ ,  $\text{M}+\text{H}$ ), 315.2324; found, 315.2309.

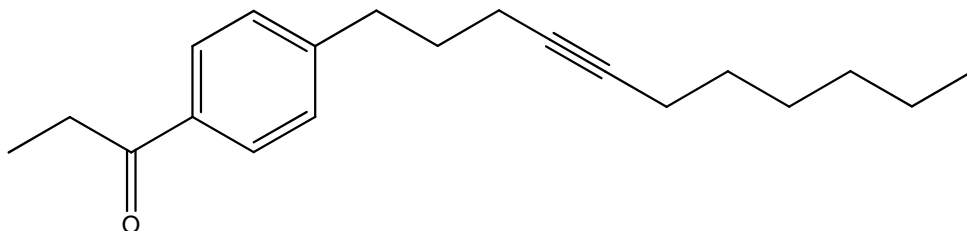

**1-(4-(undec-4-ynyl)phenyl)propan-1-one (table 2, entry 5):**

Eluted from the column with hexane-diethyl ether (30:1) in 57% yield as a slightly yellow liquid:

**$^1\text{H}$  NMR** (400MHz,  $\text{CDCl}_3$ ): 7.89 (d,  $J = 8.2$  Hz, 2H), 7.27 (d,  $J = 8.2$  Hz, 2H), 2.98 (q,  $J = 7.3$  Hz, 2H), 2.77 (t,  $J = 7.6$  Hz, 2H), 2.16 (t,  $J = 5.6$  Hz, 4H), 1.80 (m, 2H), 1.49 (m, 2H), 1.36 (m, 6H), 1.22 (t,  $J = 7.3$  Hz, 3H), 0.89 (t,  $J = 6.2$  Hz, 3H).

**$^{13}\text{C}$  NMR** (100 MHz,  $\text{CDCl}_3$ ): 200.4, 147.4, 134.8, 128.6, 128.1, 81.1, 79.2, 34.7, 31.6, 31.3, 30.3, 29.0, 28.5, 22.5, 18.7, 18.1, 14.0, 8.3.

**HRCI-MS:** calculated for ( $\text{C}_{20}\text{H}_{29}\text{O}$ ,  $\text{M}+\text{H}$ ), 285.2218; found, 285.2223.

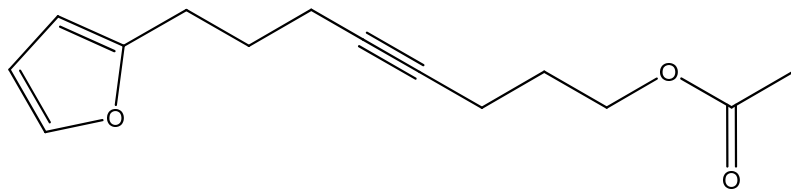

**8-(furan-2-yl)oct-4-ynyl acetate (table 2, entry 6):**

Eluated from the column with hexane-diethyl ether (20:1) in 64% yield as a colorless liquid:

**<sup>1</sup>H NMR** (400MHz, CDCl<sub>3</sub>): 7.29 (m, 1H), 6.27 (m, 1H), 6.00 (m, 1H), 4.15 (t, *J* = 6.2 Hz, 2H), 2.71 (t, *J* = 7.6 Hz, 2H), 2.25 (m, 2H), 2.18 (m, 2H), 2.05 (s, 3H), 1.80 (m, 4H).

**<sup>13</sup>C NMR** (100 MHz, CDCl<sub>3</sub>): 171.0, 155.4, 140.8, 110.0, 105.0, 80.1, 79.1, 63.2, 28.0, 27.3, 26.9, 20.9, 18.1, 15.4.

**HRCI-MS:** calculated for (C<sub>14</sub>H<sub>19</sub>O<sub>3</sub>, M+H), 235.1334; found, 235.1328.

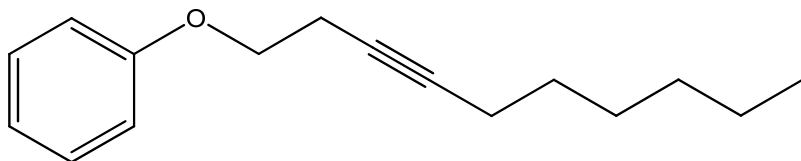

**(dec-3-ynyloxy)benzene (table 2, entry 7):**

Eluated from the column with hexane-diethyl ether (60:1) in 88% yield as a colorless liquid:

**<sup>1</sup>H NMR** (400MHz, CDCl<sub>3</sub>): 7.29 (m, 2H), 6.95 (m, 3H), 4.07 (t, *J* = 7.3 Hz, 2H), 2.66 (t, *J* = 7.3 Hz, 2H), 2.17 (t, *J* = 7.0 Hz, 2H), 1.50 (m, 2H), 1.25-1.42 (m, 6H), 0.91 (t, *J* = 6.7 Hz, 3H).

**<sup>13</sup>C NMR** (100 MHz, CDCl<sub>3</sub>): 158.5, 129.4, 120.8, 114.6, 82.0, 75.7, 66.5, 31.3, 28.8, 28.5, 22.5, 19.8, 18.7, 14.0.

**HRCI-MS:** calculated for (C<sub>16</sub>H<sub>23</sub>O, M+H), 231.1749; found, 231.1758.

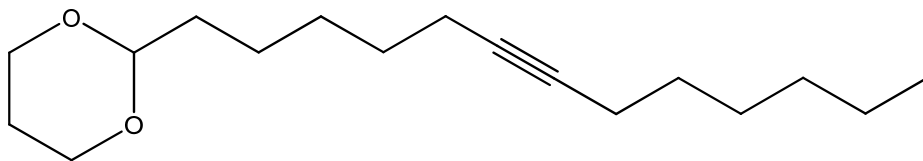

**2-(tridec-6-ynyl)-1,3-dioxane (table 2, entry 8):**

Eluated from the column with hexane-diethyl ether (20:1 to 9:1) in 73% yield as a colorless liquid:

**$^1\text{H}$  NMR** (400MHz,  $\text{CDCl}_3$ ): 4.50 (t,  $J = 5.3$  Hz, 1H), 4.09 (dd,  $J_1 = 11.2$  Hz,  $J_2 = 5.3$  Hz, 2H), 3.75 (m, 2H), 2.08 (m, 4H), 1.43 (m, 18H), 0.88 (t,  $J = 6.7$  Hz, 3H).

**$^{13}\text{C}$  NMR** (100 MHz,  $\text{CDCl}_3$ ): 102.3, 80.2, 80.0, 66.8, 35.1, 31.3, 29.1, 29.0, 28.6, 28.5, 25.8, 23.5, 22.5, 18.7, 18.6, 14.0.

**HRCI-MS:** calculated for ( $\text{C}_{17}\text{H}_{31}\text{O}_2$ , M+H), 267.2324; found, 267.2314.

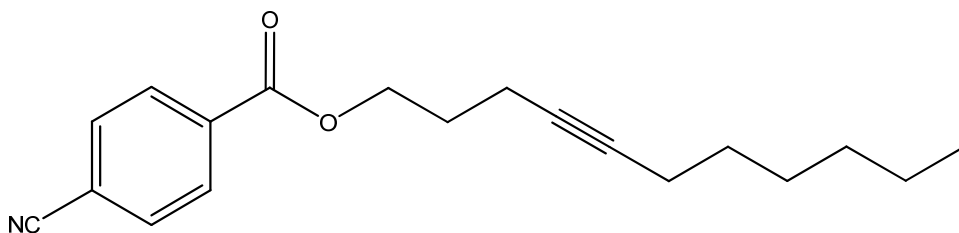

**undec-4-ynyl 4-cyanobenzoate (table 2, entry 9):**

Eluated from the column with hexane-diethyl ether (15:1) in 63% yield as a colorless liquid:

**$^1\text{H}$  NMR** (400MHz,  $\text{CDCl}_3$ ): 8.14 (d,  $J = 8.5$  Hz, 2H), 7.74 (d,  $J = 8.5$  Hz, 2H), 4.45 (t,  $J = 6.5$  Hz, 2H), 2.34 (t,  $J = 6.7$  Hz, 2H), 2.11 (t,  $J = 6.7$  Hz, 2H), 1.95 (quint,  $J = 6.7$  Hz, 2H), 1.45 (m, 2H), 1.30 (m, 6H), 0.87 (t,  $J = 6.5$  Hz, 3H).

**$^{13}\text{C}$  NMR** (100 MHz,  $\text{CDCl}_3$ ): 164.8, 134.1, 132.1, 130.0, 117.9, 116.3, 81.4, 78.1, 64.6, 31.3, 28.9, 28.5, 28.0, 22.5, 18.6, 15.6, 14.0.

**HRCI-MS:** calculated for ( $\text{C}_{19}\text{H}_{24}\text{NO}_2$ ,  $\text{M}+\text{H}$ ), 298.1807; found, 298.1819.

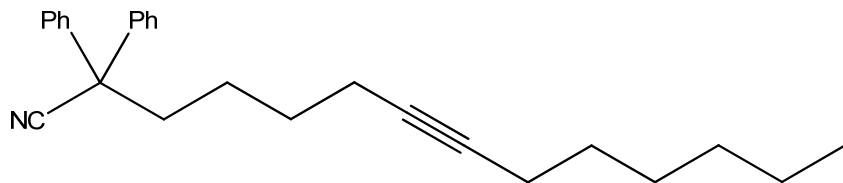

**2,2-diphenyltetradec-7-ynenitrile (table 2, entry 10):**

Eluted from the column with hexane-diethyl ether (30:1) in 66% yield as a colorless liquid:

**$^1\text{H}$  NMR** (400MHz,  $\text{CDCl}_3$ ): 7.37 (m, 8H), 7.29 (m, 2H), 2.39 (t,  $J = 7.6$  Hz, 2H), 2.16 (m, 2H), 2.10 (t,  $J = 7.3$  Hz, 2H), 1.57 (m, 4H), 1.43 (m, 2H), 1.22-1.38 (m, 6H), 0.89 (t,  $J = 6.5$  Hz, 3H).

**$^{13}\text{C}$  NMR** (100 MHz,  $\text{CDCl}_3$ ): 140.2, 128.7, 127.7, 126.8, 122.3, 80.8, 79.2, 51.7, 39.1, 31.3, 29.0, 28.8, 28.5, 24.7, 22.5, 18.6, 18.4, 14.0.

**HRCI-MS:** calculated for ( $\text{C}_{26}\text{H}_{32}\text{N}$ ,  $\text{M}+\text{H}$ ), 358.2535; found, 358.2540.

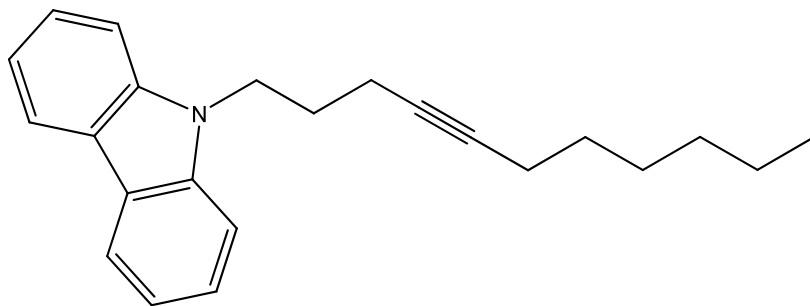

**9-(undec-4-ynyl)-9H-carbazole (table 2, entry 11):**



Eluated from the column with hexane-diethyl ether (30:1) in 85% yield as a slightly yellow liquid:

**<sup>1</sup>H NMR** (400MHz, CDCl<sub>3</sub>): 8.12 (d, *J* = 7.9 Hz, 2H), 7.50 (m, 4H), 7.26 (m, 2H), 4.46 (t, *J* = 7.0 Hz, 2H), 2.24 (m, 4H), 2.07 (m, 2H), 1.58 (m, 2H), 1.46 (m, 2H), 1.34 (m, 4H), 0.93 (t, *J* = 6.7 Hz, 3H).

**<sup>13</sup>C NMR** (100 MHz, CDCl<sub>3</sub>): 140.4, 125.5, 122.8, 120.2, 118.8, 108.6, 81.5, 78.9, 41.6, 31.4, 29.1, 28.6, 28.2, 22.5, 18.8, 16.5, 14.0.

**HRCI-MS:** calculated for (C<sub>23</sub>H<sub>28</sub>N, M+H), 318.2222; found, 318.2232.

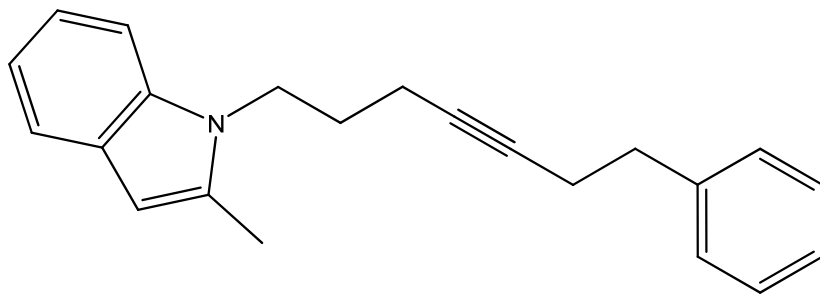

**2-methyl-1-(7-phenylhept-4-ynyl)-1H-indole (table 2, entry 12):**

Eluated from the column with hexane-diethyl ether (30:1) in 75% yield as a colorless liquid:

**<sup>1</sup>H NMR** (400MHz, CDCl<sub>3</sub>): 7.56 (d, *J* = 8.5 Hz, 1H), 7.31 (m, 6H), 7.17 (t, *J* = 7.0 Hz, 1H), 7.11 (m, 1H), 6.28 (s, 1H), 4.16 (t, *J* = 7.0 Hz, 2H), 2.89 (t, *J* = 7.6 Hz, 2H), 2.56 (t, *J* = 7.3 Hz, 2H), 2.44 (s, 3H), 2.21 (t, *J* = 6.5 Hz, 2H), 1.94 (m, 2H).

**<sup>13</sup>C NMR** (100 MHz, CDCl<sub>3</sub>): 140.7, 136.5, 136.4, 128.38, 128.33, 128.0, 126.2, 120.3, 119.5, 119.1, 108.9, 99.9, 80.6, 79.6, 41.7, 35.3, 29.1, 20.8, 16.2, 12.6.

**HRCI-MS:** calculated for (C<sub>22</sub>H<sub>24</sub>N, M+H), 302.1909; found, 302.1899.

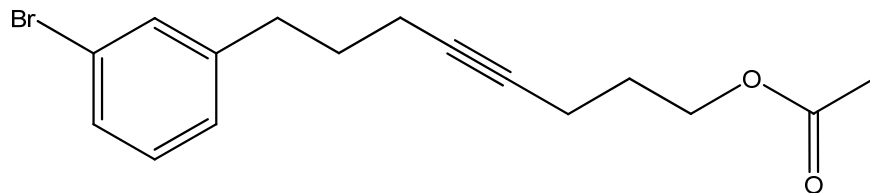

**8-(3-bromophenyl)oct-4-ynyl acetate (table 2, entry 13):**

Eluted from the column with hexane-diethyl ether (15:1) in 58% yield as a colorless liquid:

**<sup>1</sup>H NMR** (400MHz, CDCl<sub>3</sub>): 7.32 (m, 2H), 7.12 (m, 2H), 4.17 (t, *J* = 6.5 Hz, 2H), 2.67 (t, *J* = 7.3 Hz, 2H), 2.27 (t, *J* = 6.7 Hz, 2H), 2.15 (t, *J* = 7.0 Hz, 2H), 2.05 (s, 3H), 1.80 (m, 4H).

**<sup>13</sup>C NMR** (100 MHz, CDCl<sub>3</sub>): 171.0, 144.0, 131.4, 129.8, 128.9, 127.1, 122.3, 80.2, 79.3, 63.2, 34.3, 30.2, 28.0, 20.9, 18.0, 15.4.

**HRCI-MS:** calculated for (C<sub>16</sub>H<sub>20</sub>BrO<sub>2</sub>, M+H), 323.0647 and 325.0628; found, 323.0659 and 325.0643.

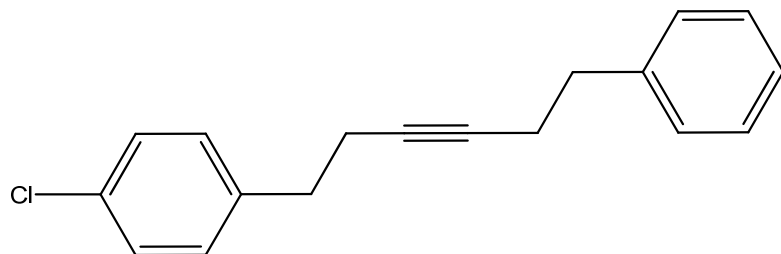

**1-chloro-4-(6-phenylhex-3-ynyl)benzene (table 2, entry 14):**

Eluted from the column with hexane-diethyl ether (60:1) in 72% yield as a colorless liquid:

**<sup>1</sup>H NMR** (400MHz, CDCl<sub>3</sub>): 7.30 (m, 2H), 7.23 (m, 5H), 7.11 (d, *J* = 8.2 Hz, 2H), 2.77 (m, 4H), 2.43 (m, 4H).

**<sup>13</sup>C NMR** (100 MHz, CDCl<sub>3</sub>): 140.8, 139.2, 131.8, 129.8, 128.4, 128.3, 128.2, 126.1, 80.5, 79.7, 35.3, 34.6, 20.85, 20.82.

**Elemental analysis:** Anal. Calcd for C<sub>18</sub>H<sub>17</sub>Cl: C, 80.43; H, 6.38. Found: C, 80.46; H, 6.57.

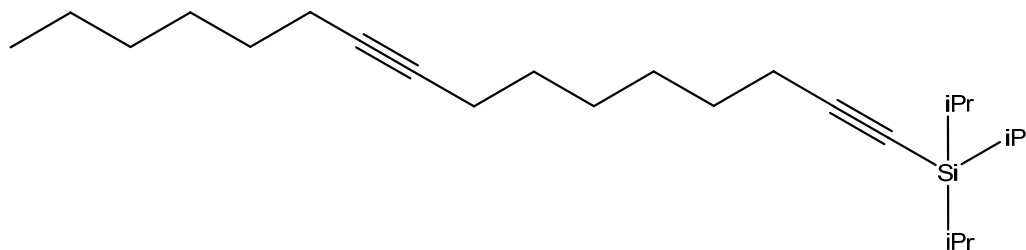

**hexadeca-1,9-diynyltriisopropylsilane (2 steps experiments, entry 1):**

Eluted from the column with hexane-diethyl ether (100:1) in 69% yield as a colorless liquid:

**<sup>1</sup>H NMR** (400MHz, CDCl<sub>3</sub>): 2.25 (t, *J* = 7.0 Hz, 2H), 2.14 (m, 4H), 1.41 (m, 16H), 1.06 (m, 21H), 0.89 (t, *J* = 6.7 Hz, 3H).

**<sup>13</sup>C NMR** (100 MHz, CDCl<sub>3</sub>): 109.1, 80.3, 80.05, 80.02, 31.3, 29.1, 29.0, 28.7, 28.5, 28.28, 28.21, 22.5, 19.7, 18.76, 18.70, 18.62, 14.0, 11.2.

**HRCI-MS:** calculated for (C<sub>25</sub>H<sub>47</sub>Si, M+H), 375.3447; found, 375.3449.

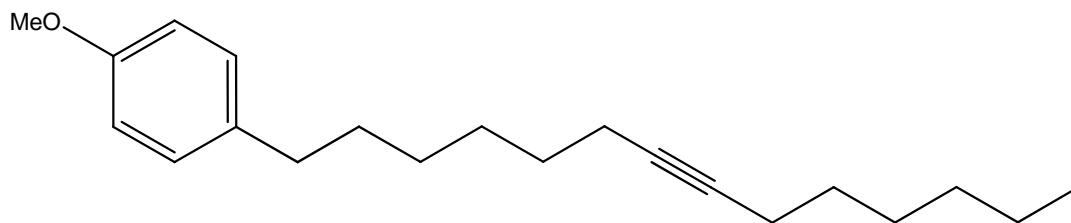

**1-methoxy-4-(tetradec-7-ynyl)benzene (2 steps experiments, entry 2):**

Eluted from the column with hexane-diethyl ether (30:1) in 86% yield as a colorless liquid:

**$^1\text{H}$  NMR** (400MHz,  $\text{CDCl}_3$ ): 7.09 (d,  $J = 8.5$  Hz, 2H), 6.82 (d,  $J = 8.5$  Hz, 2H), 3.79 (s, 3H), 2.55 (t,  $J = 7.6$  Hz, 2H), 2.14 (t,  $J = 6.5$  Hz, 4H), 1.59 (m, 2H), 1.24-1.52 (m, 14H), 0.89 (t,  $J = 6.5$  Hz, 3H).

**$^{13}\text{C}$  NMR** (100 MHz,  $\text{CDCl}_3$ ): 157.5, 134.8, 129.1, 113.6, 80.2, 80.1, 55.2, 34.9, 31.6, 31.3, 29.1, 29.0, 28.7, 28.6, 28.5, 22.5, 18.75, 18.73, 14.0.

**HRCI-MS:** calculated for ( $\text{C}_{21}\text{H}_{33}\text{O}$ ,  $\text{M}+\text{H}$ ), 301.2531; found, 301.2523.

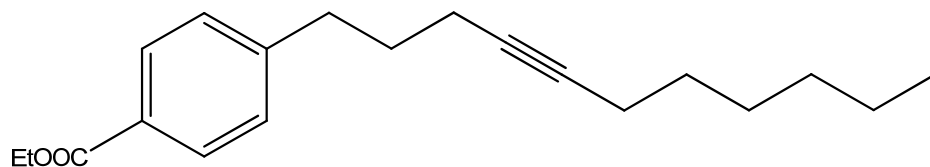

**ethyl 4-(undec-4-ynyl)benzoate (2 steps experiments, entry 3):**

Eluted from the column with hexane-diethyl ether (60:1) in 77% yield as a colorless liquid:

**$^1\text{H}$  NMR** (400MHz,  $\text{CDCl}_3$ ): 7.95 (d,  $J = 8.2$  Hz, 2H), 7.25 (d,  $J = 7.9$  Hz, 2H), 4.36 (q,  $J = 7.0$  Hz, 2H), 2.77 (t,  $J = 7.6$  Hz, 2H), 2.16 (t,  $J = 6.7$  Hz, 4H), 1.80 (quint,  $J = 6.7$  Hz, 2H), 1.49 (m, 2H), 1.38 (t,  $J = 7.3$  Hz, 3H), 1.26-1.44 (m, 6H), 0.88 (t,  $J = 6.5$  Hz, 3H).

**$^{13}\text{C}$  NMR** (100 MHz,  $\text{CDCl}_3$ ): 166.5, 147.2, 129.5, 128.4, 128.1, 81.1, 79.2, 60.7, 34.7, 31.3, 30.3, 29.0, 28.5, 22.5, 18.7, 18.1, 14.3, 14.0. **HRCI-MS:** calculated for ( $\text{C}_{20}\text{H}_{29}\text{O}_2$ ,  $\text{M}+\text{H}$ ), 301.2168; found, 301.2159.

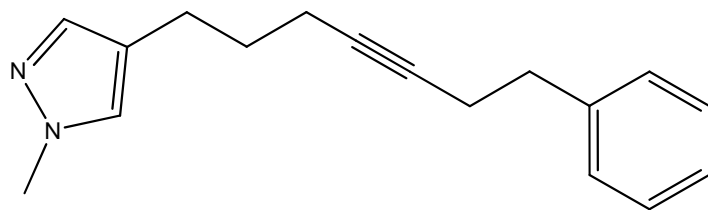

**1-methyl-4-(7-phenylhept-4-ynyl)-1H-pyrazole (2 steps experiments, entry 4):**

Eluated from the column with hexane-diethyl ether (1:1) in 73% yield as a colorless liquid:

**<sup>1</sup>H NMR** (400MHz, CDCl<sub>3</sub>): 7.26 (m, 6H), 7.10 (s, 1H), 3.85 (s, 3H), 2.82 (t, *J* = 7.3 Hz, 2H), 2.49 (m, 4H), 2.16 (t, *J* = 7.3 Hz, 2H), 1.69 (quint, *J* = 7.3 Hz, 2H).

**<sup>13</sup>C NMR** (100 MHz, CDCl<sub>3</sub>): 140.8, 138.6, 128.4, 128.2, 126.0, 120.9, 80.3, 79.9, 38.7, 35.4, 30.0, 22.9, 20.8, 18.0. **HRCI-MS**: calculated for (C<sub>17</sub>H<sub>21</sub>N<sub>2</sub>, M+H), 253.1705; found, 253.1695.

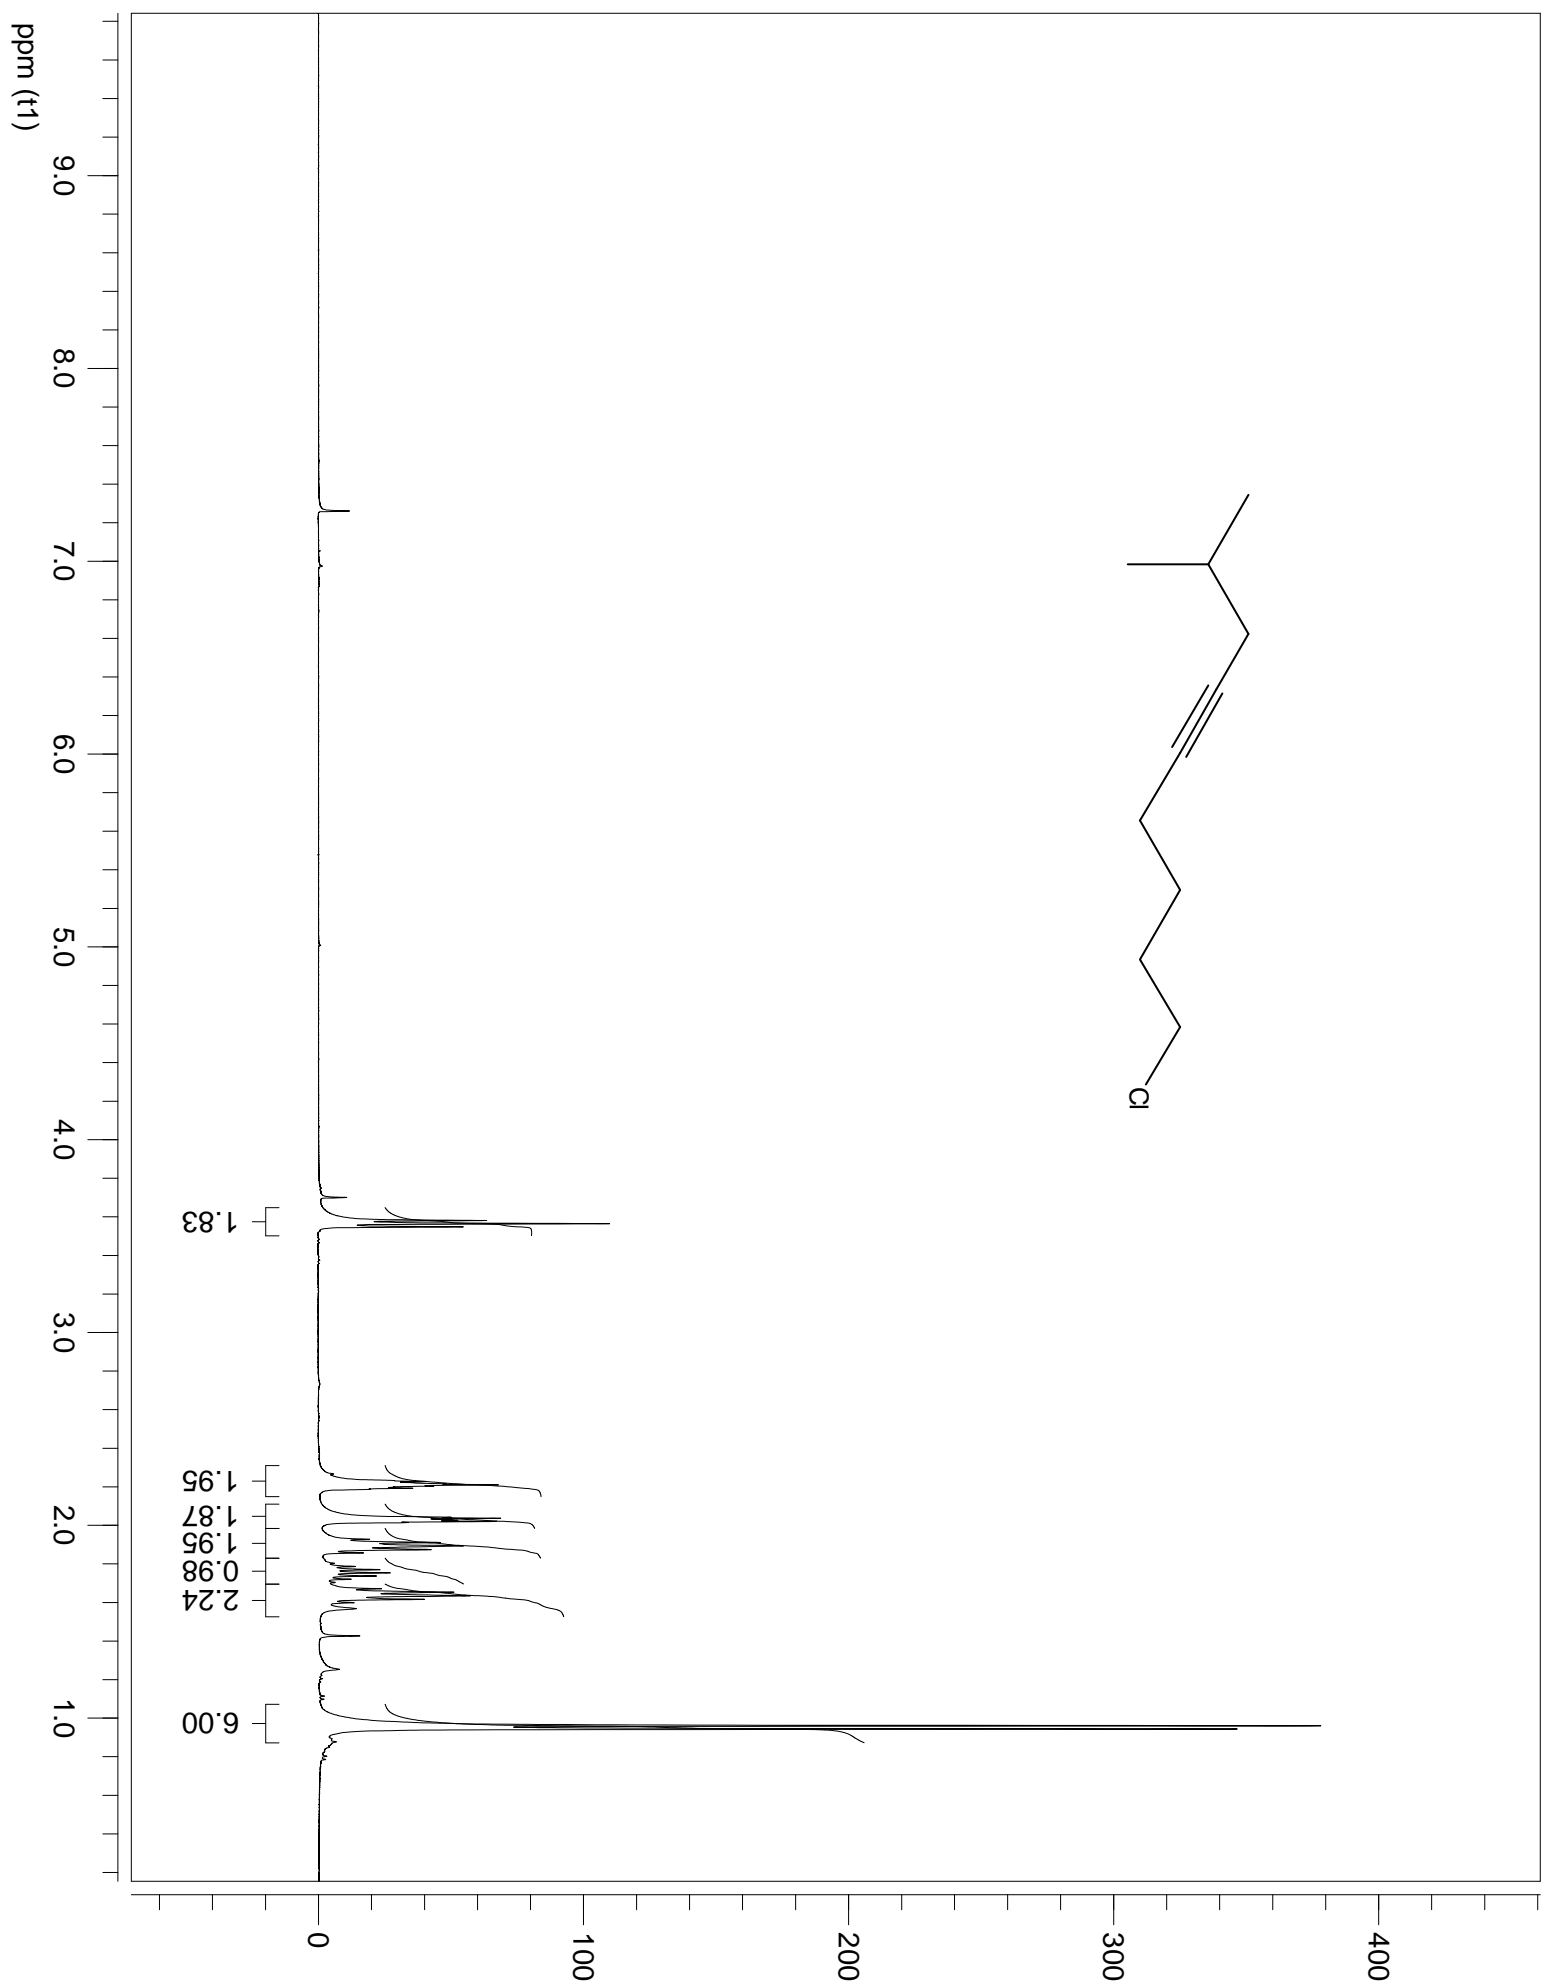

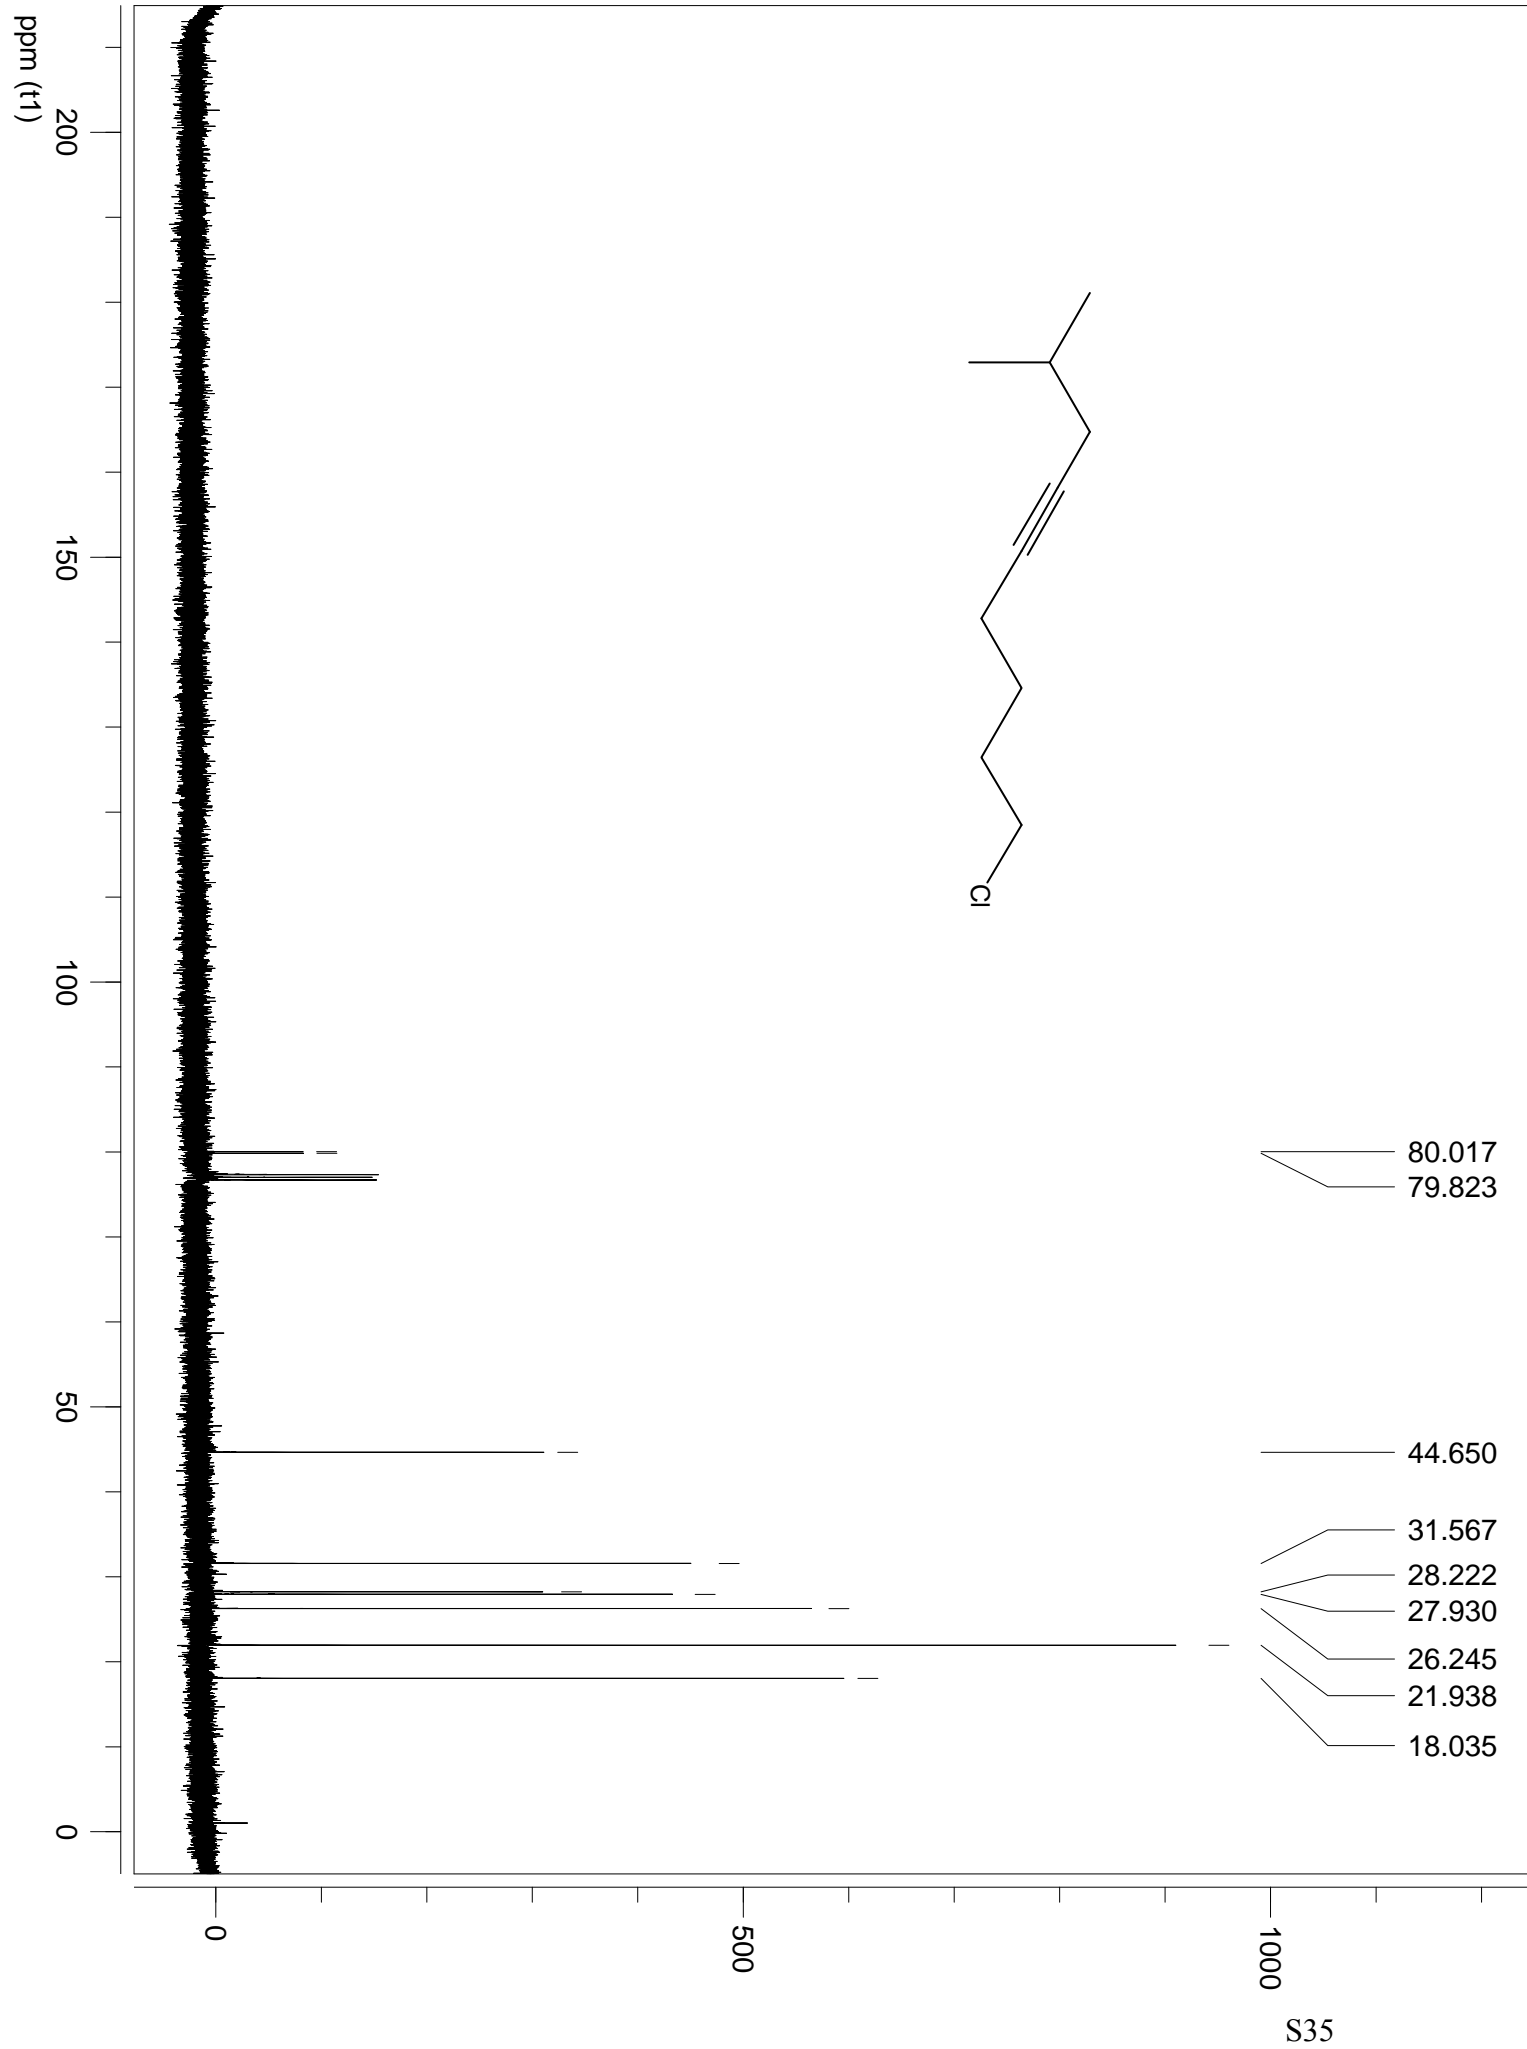

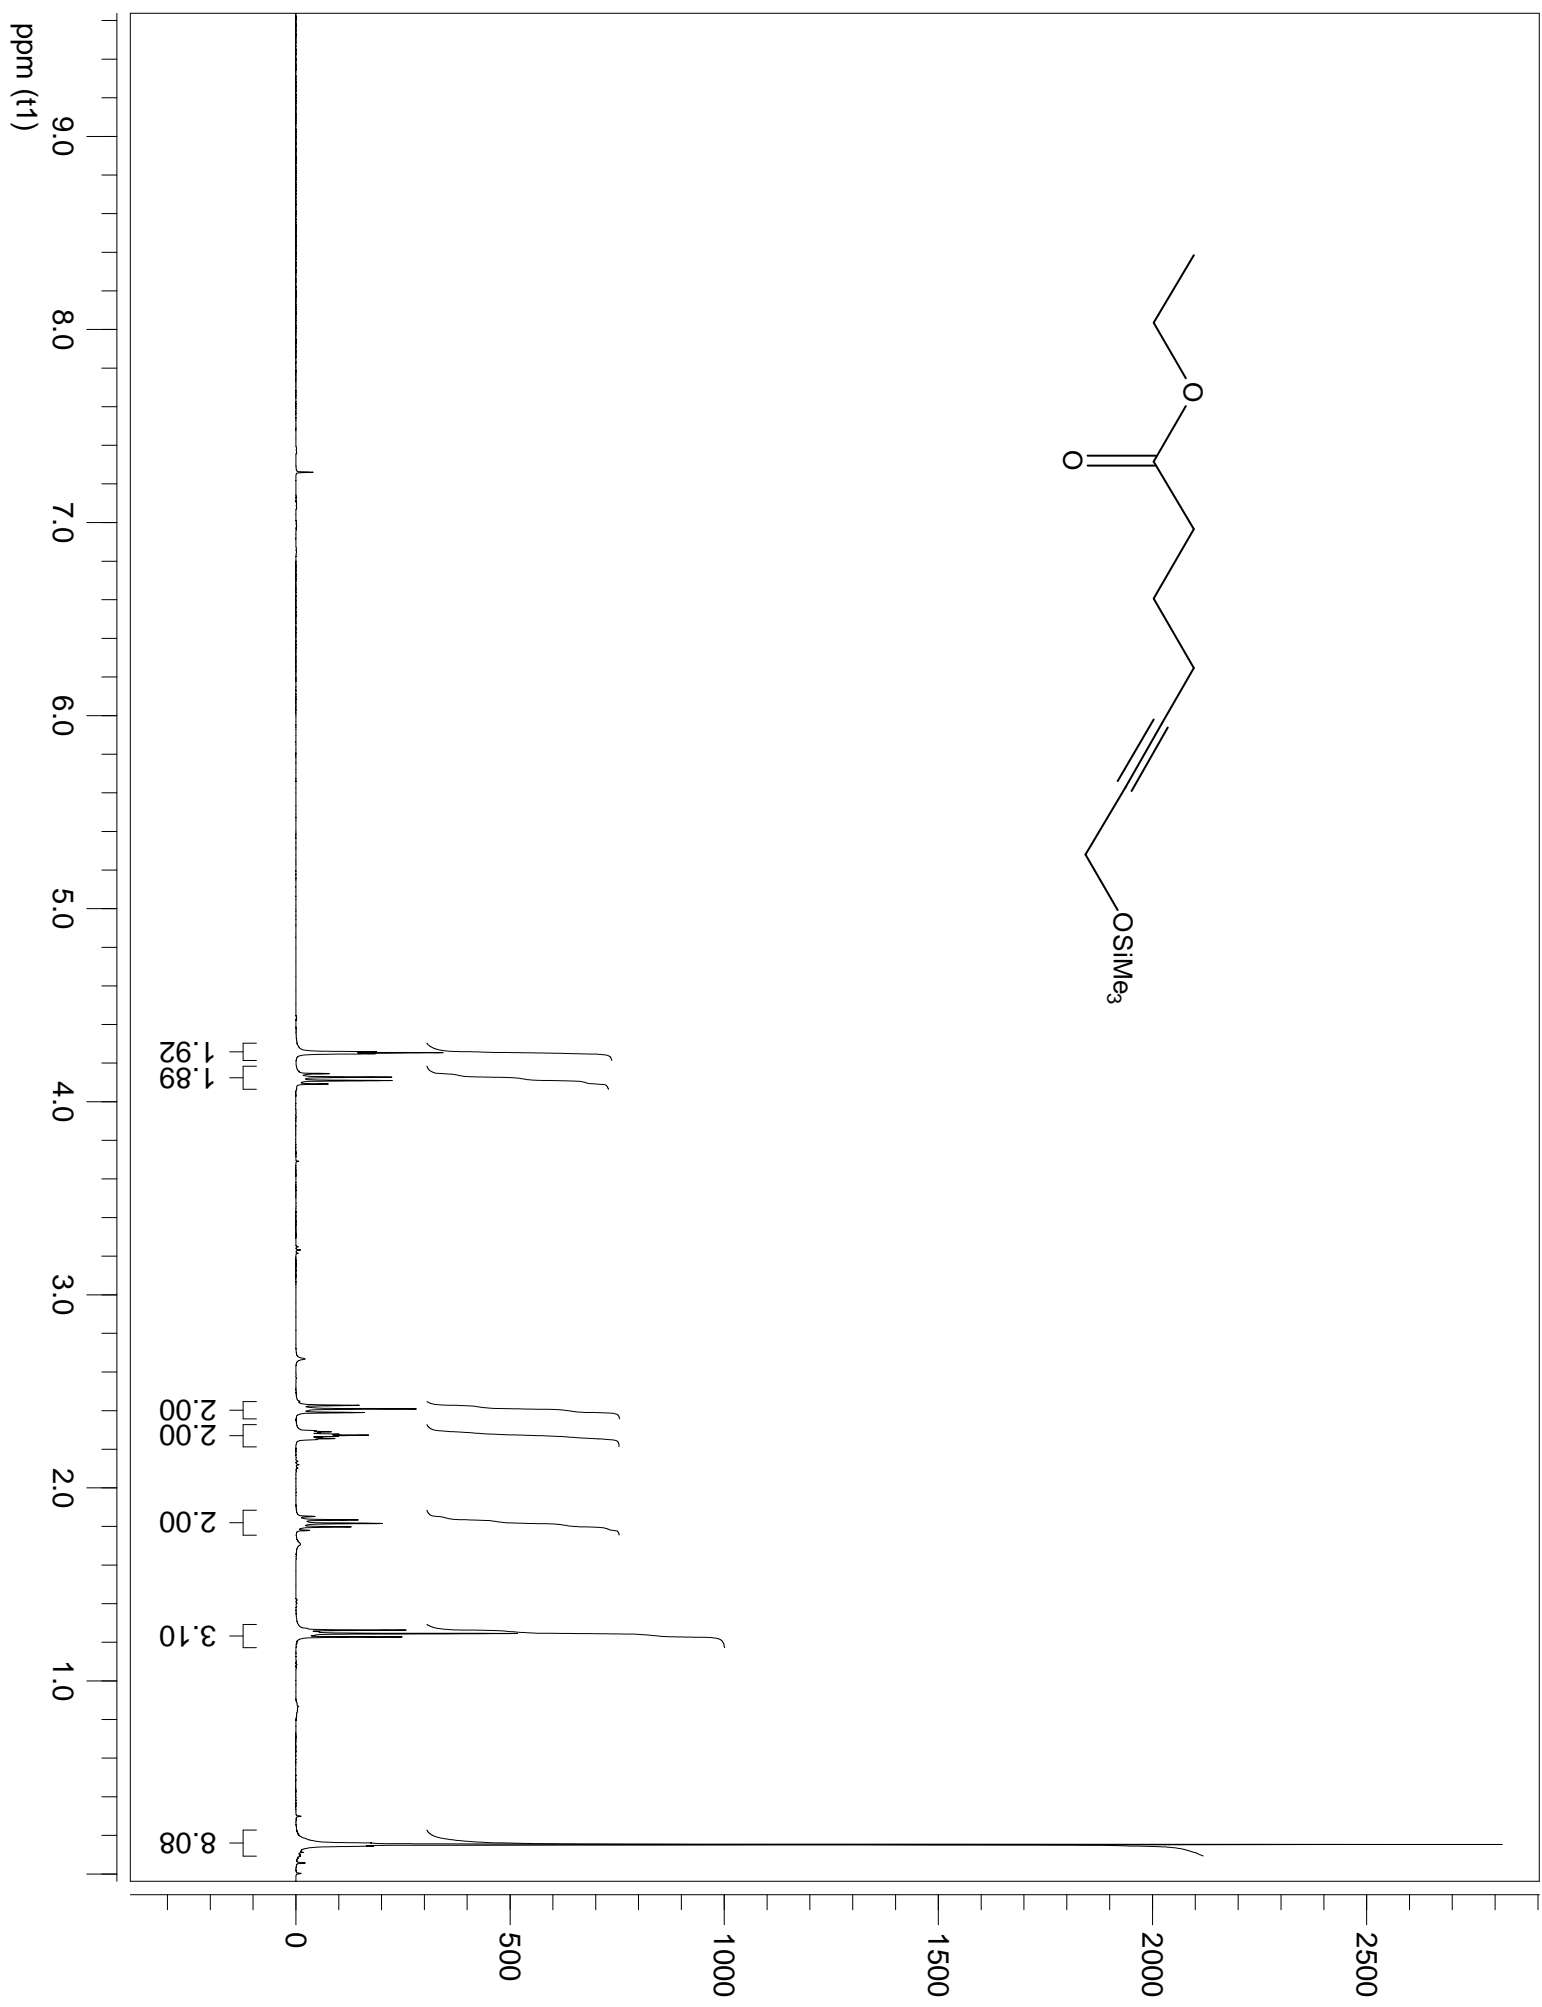



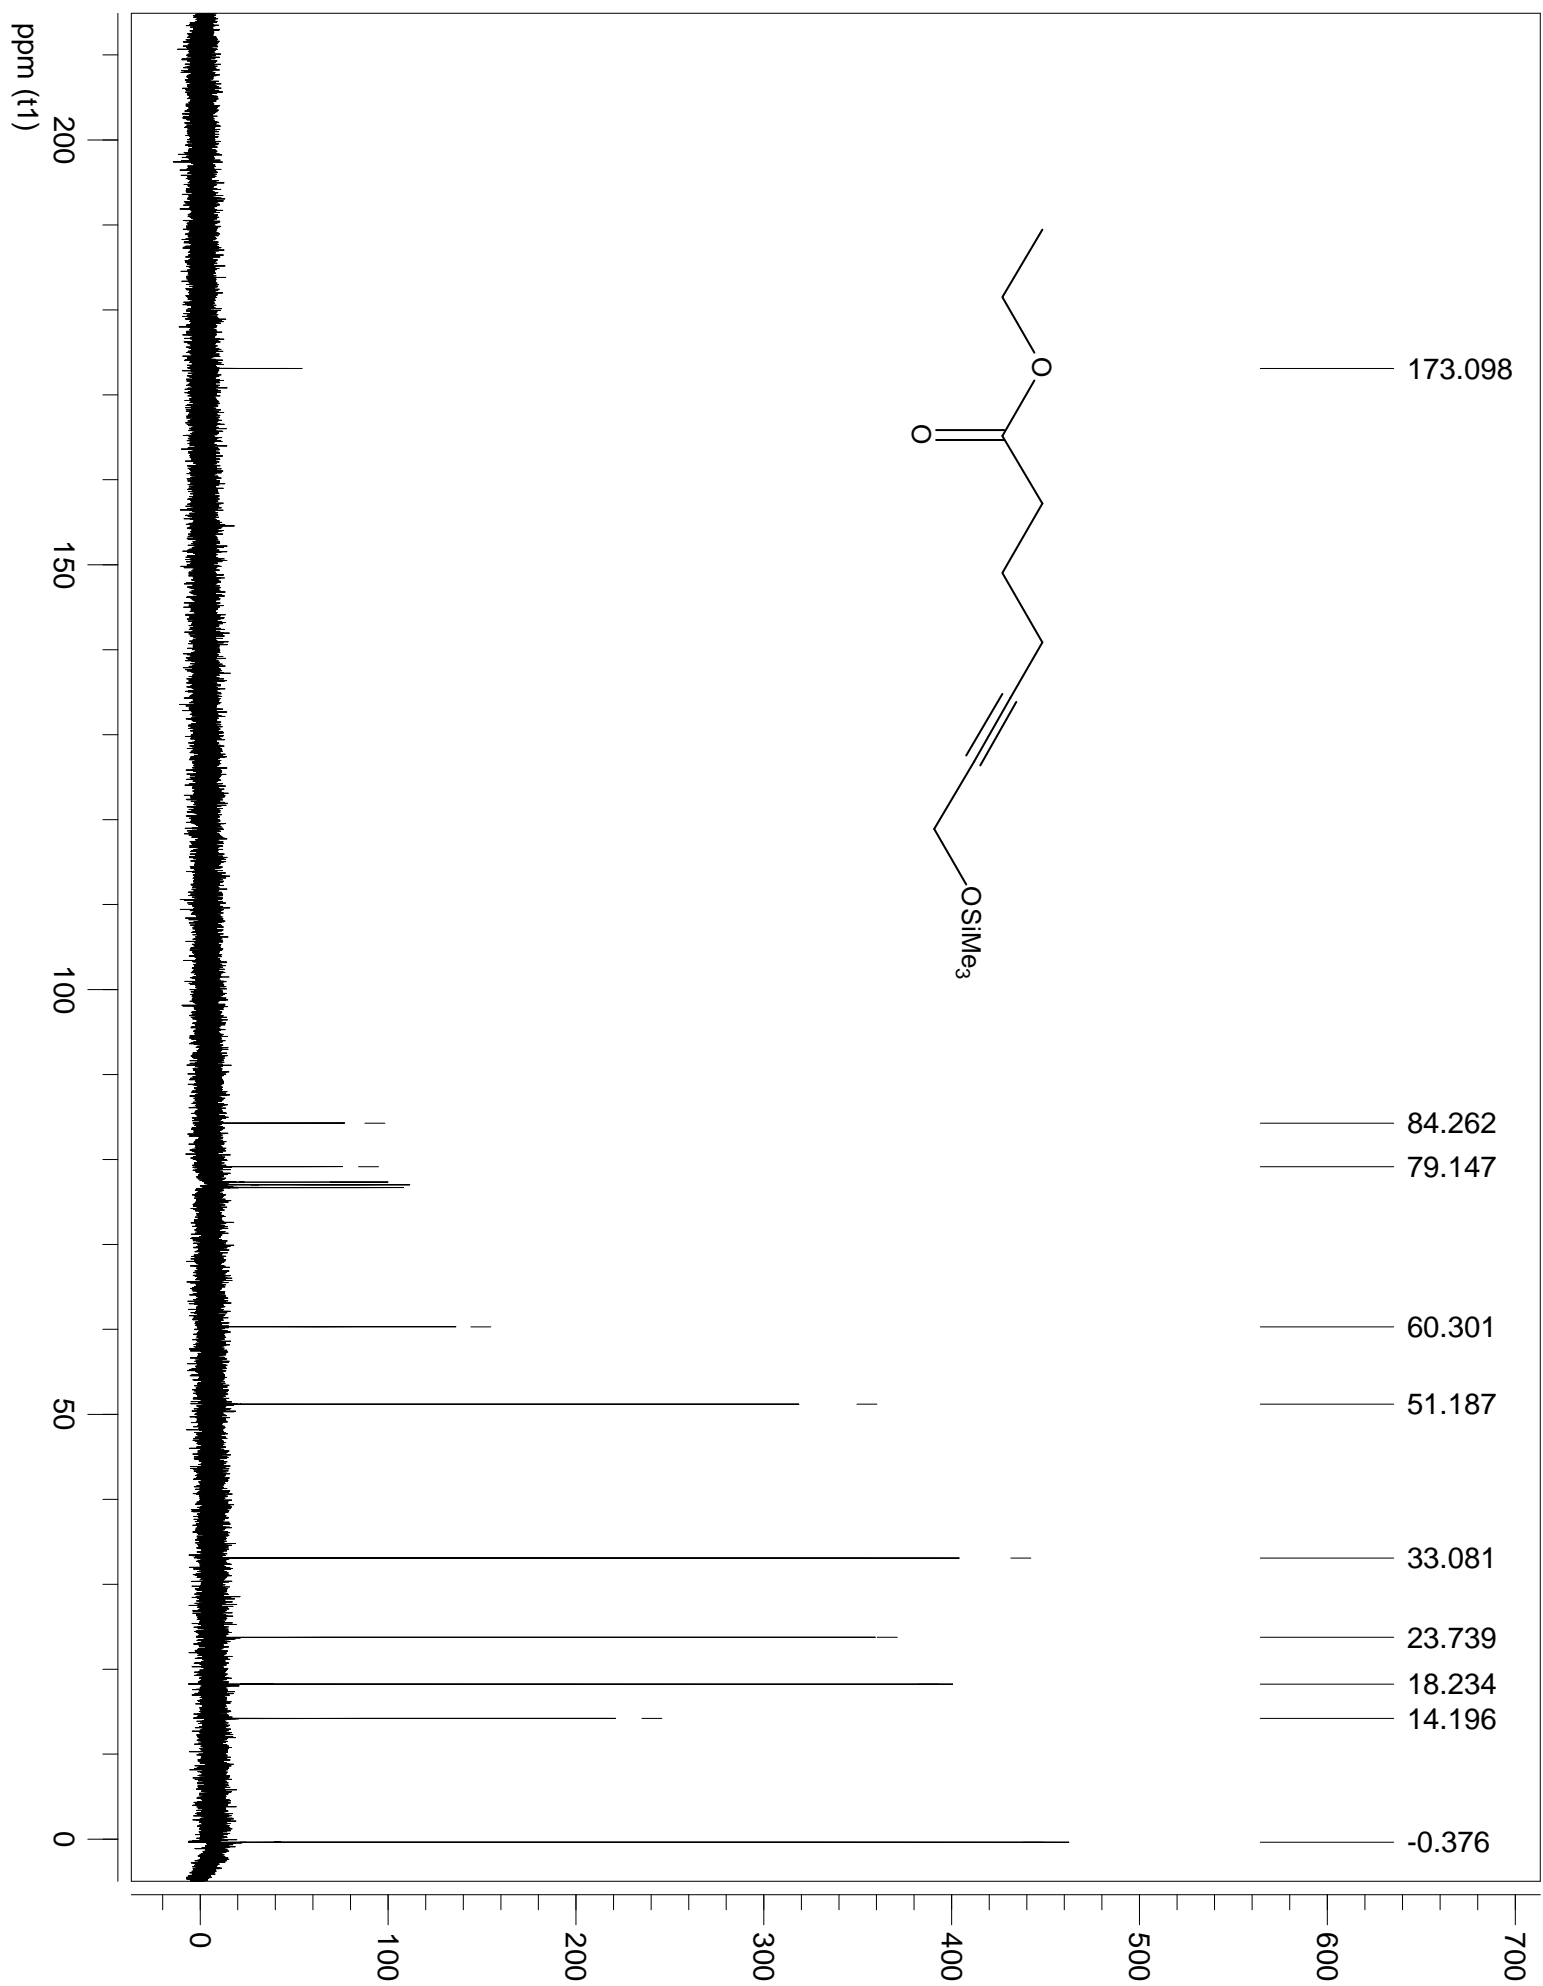

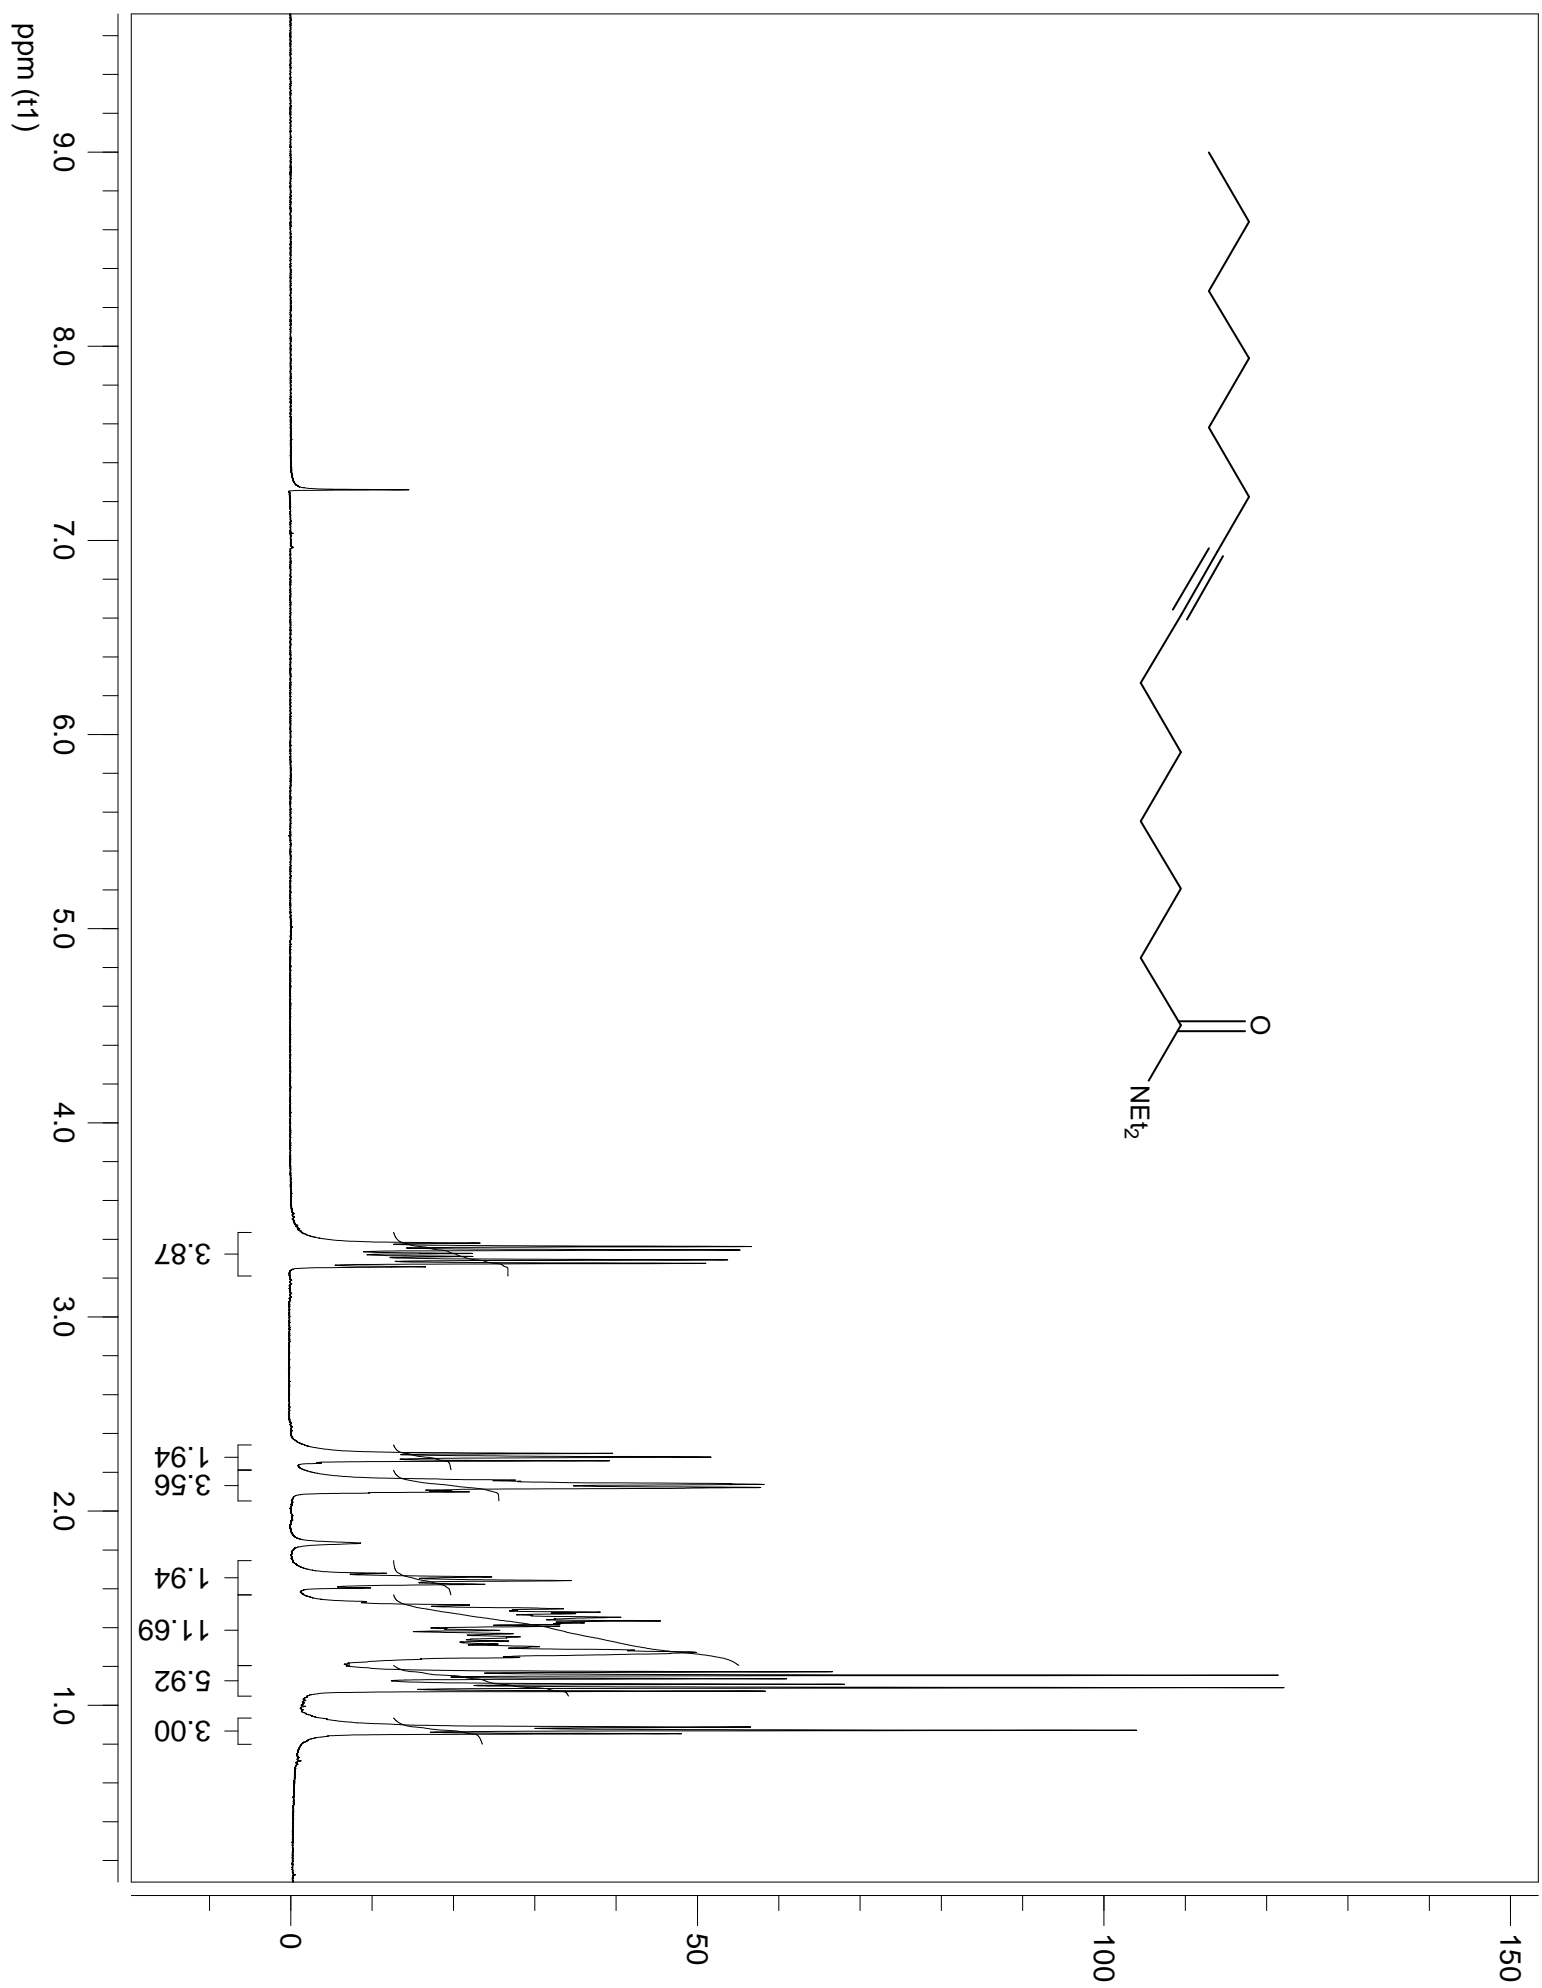

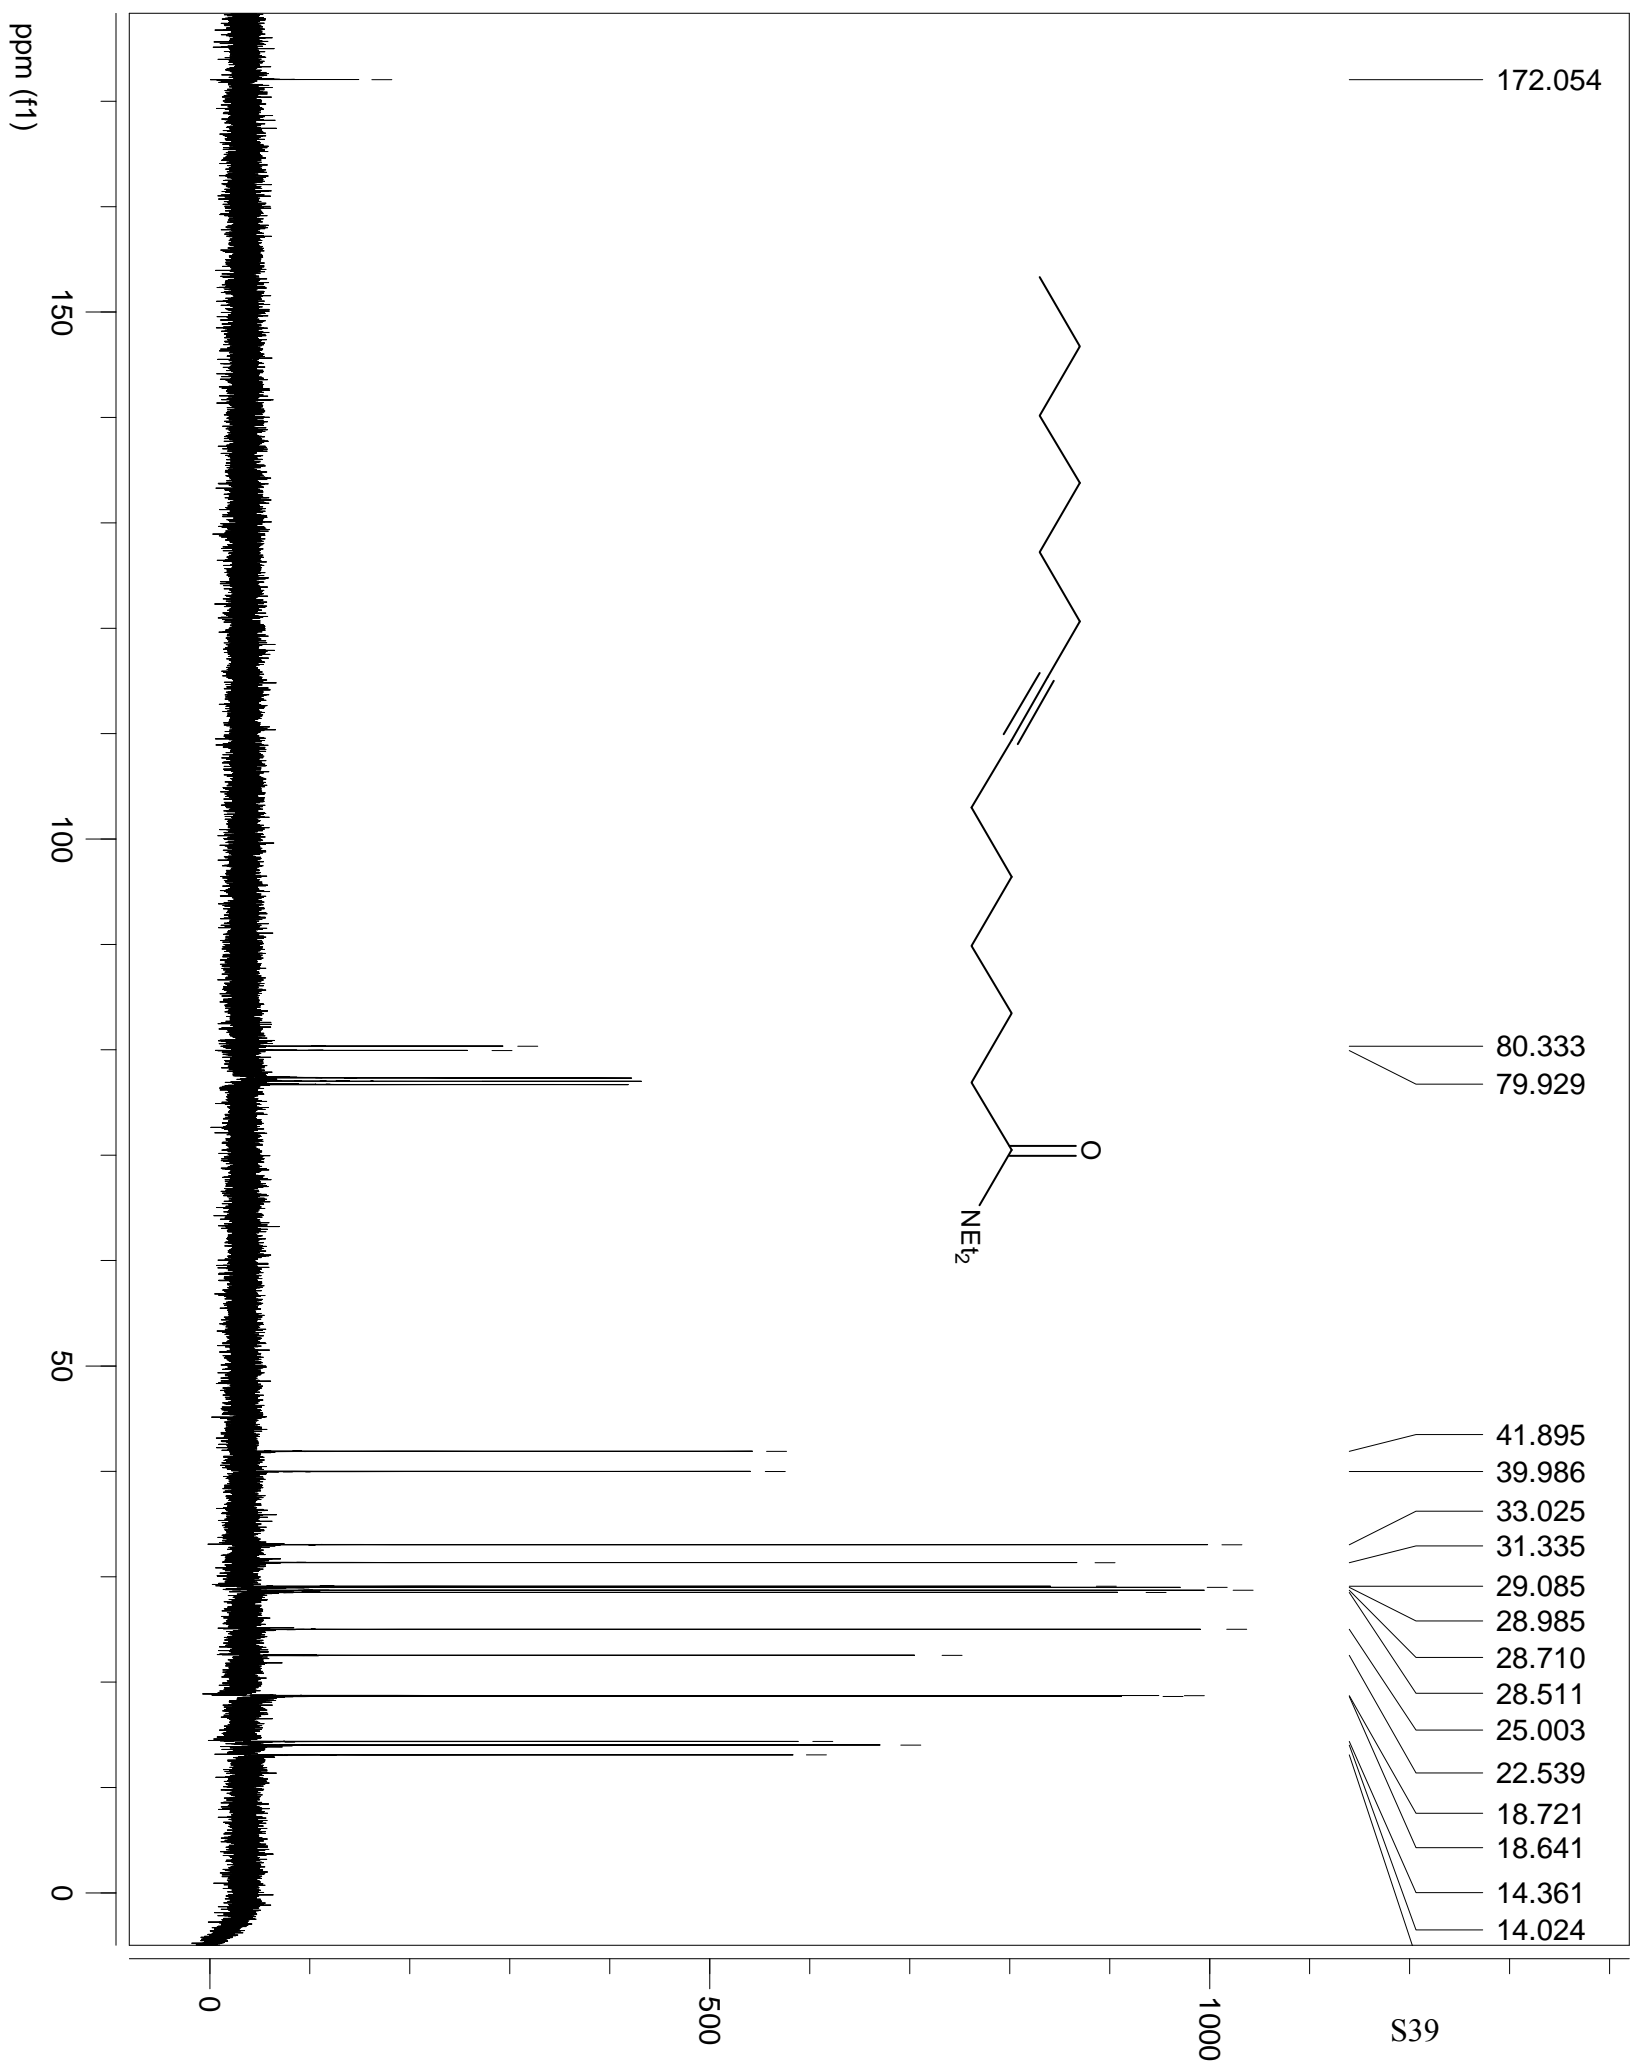

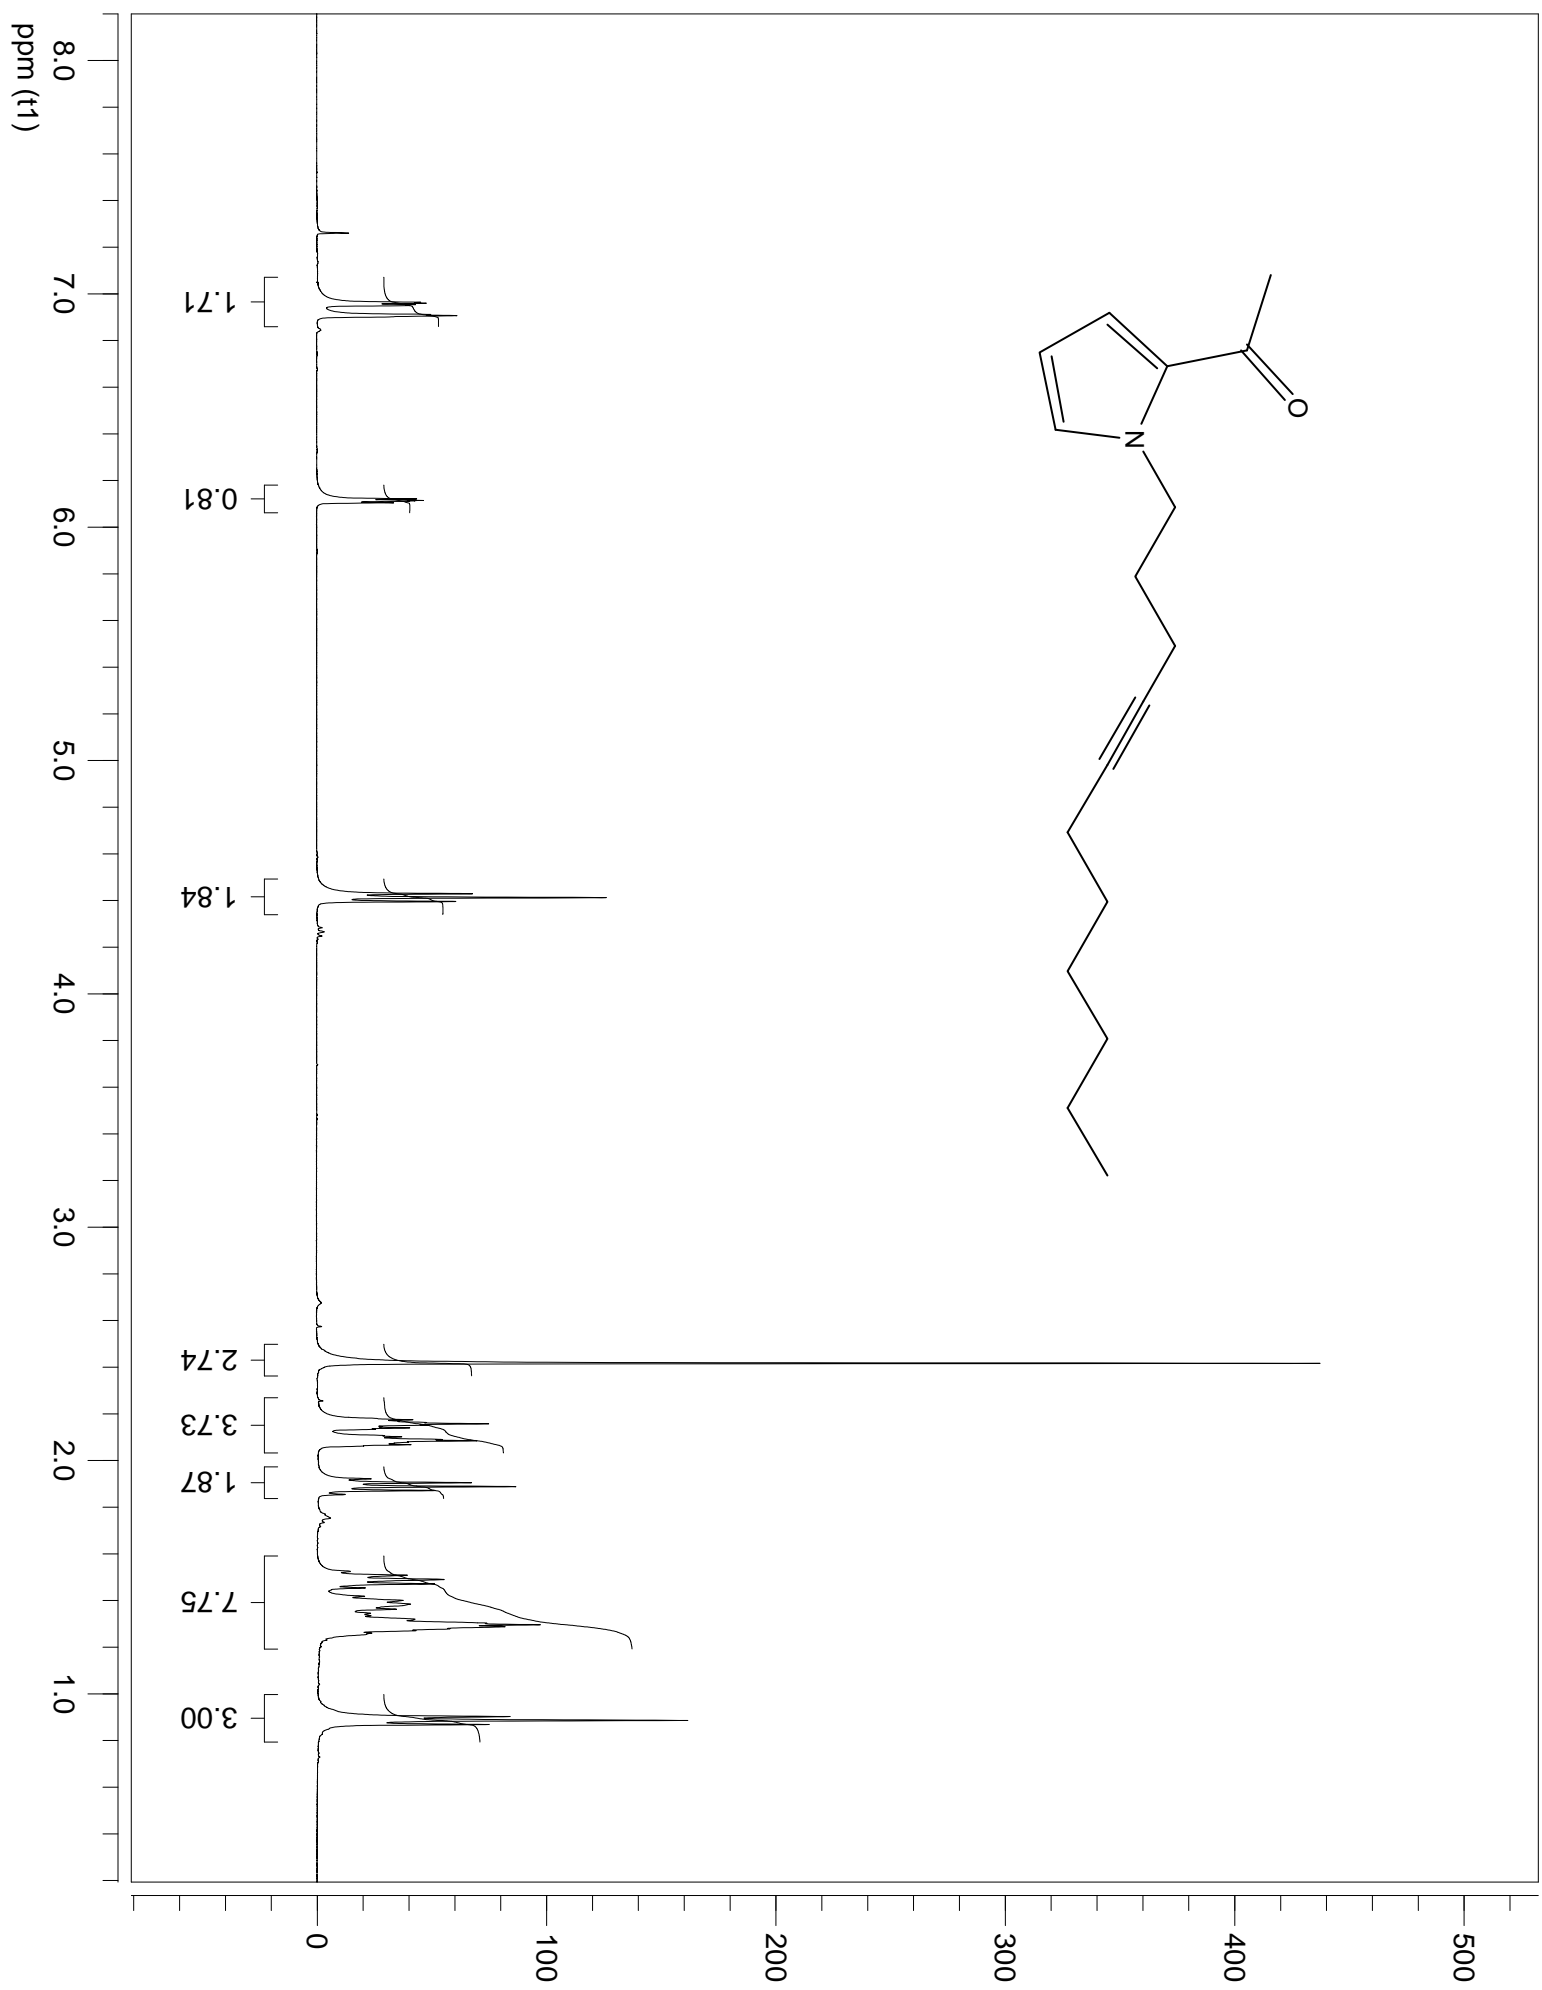

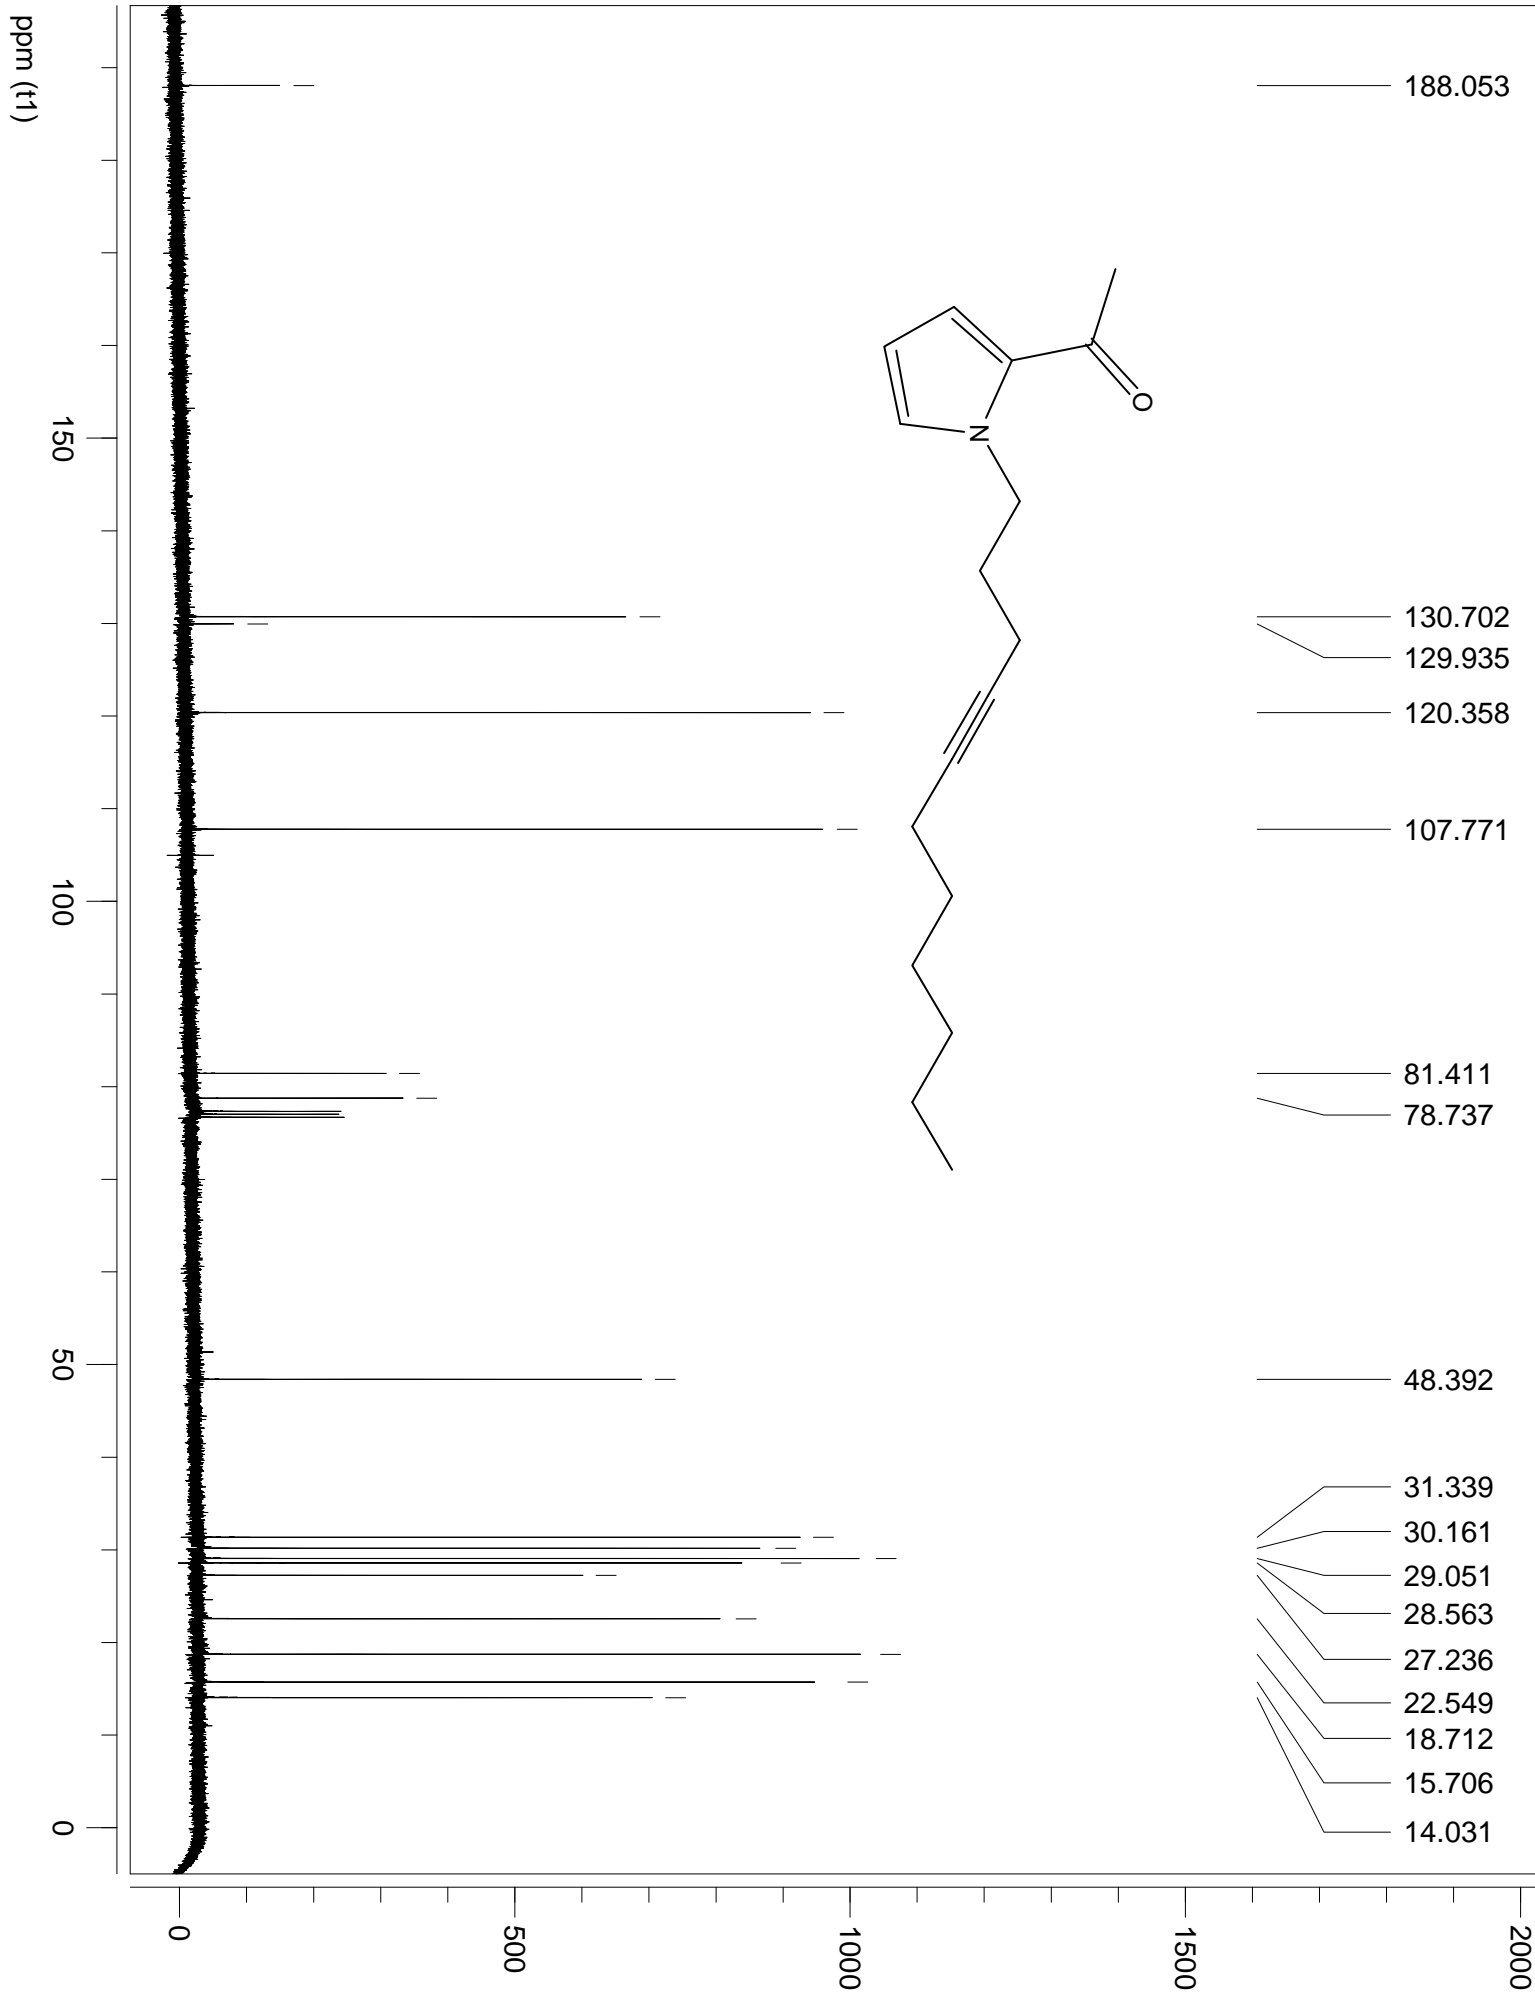

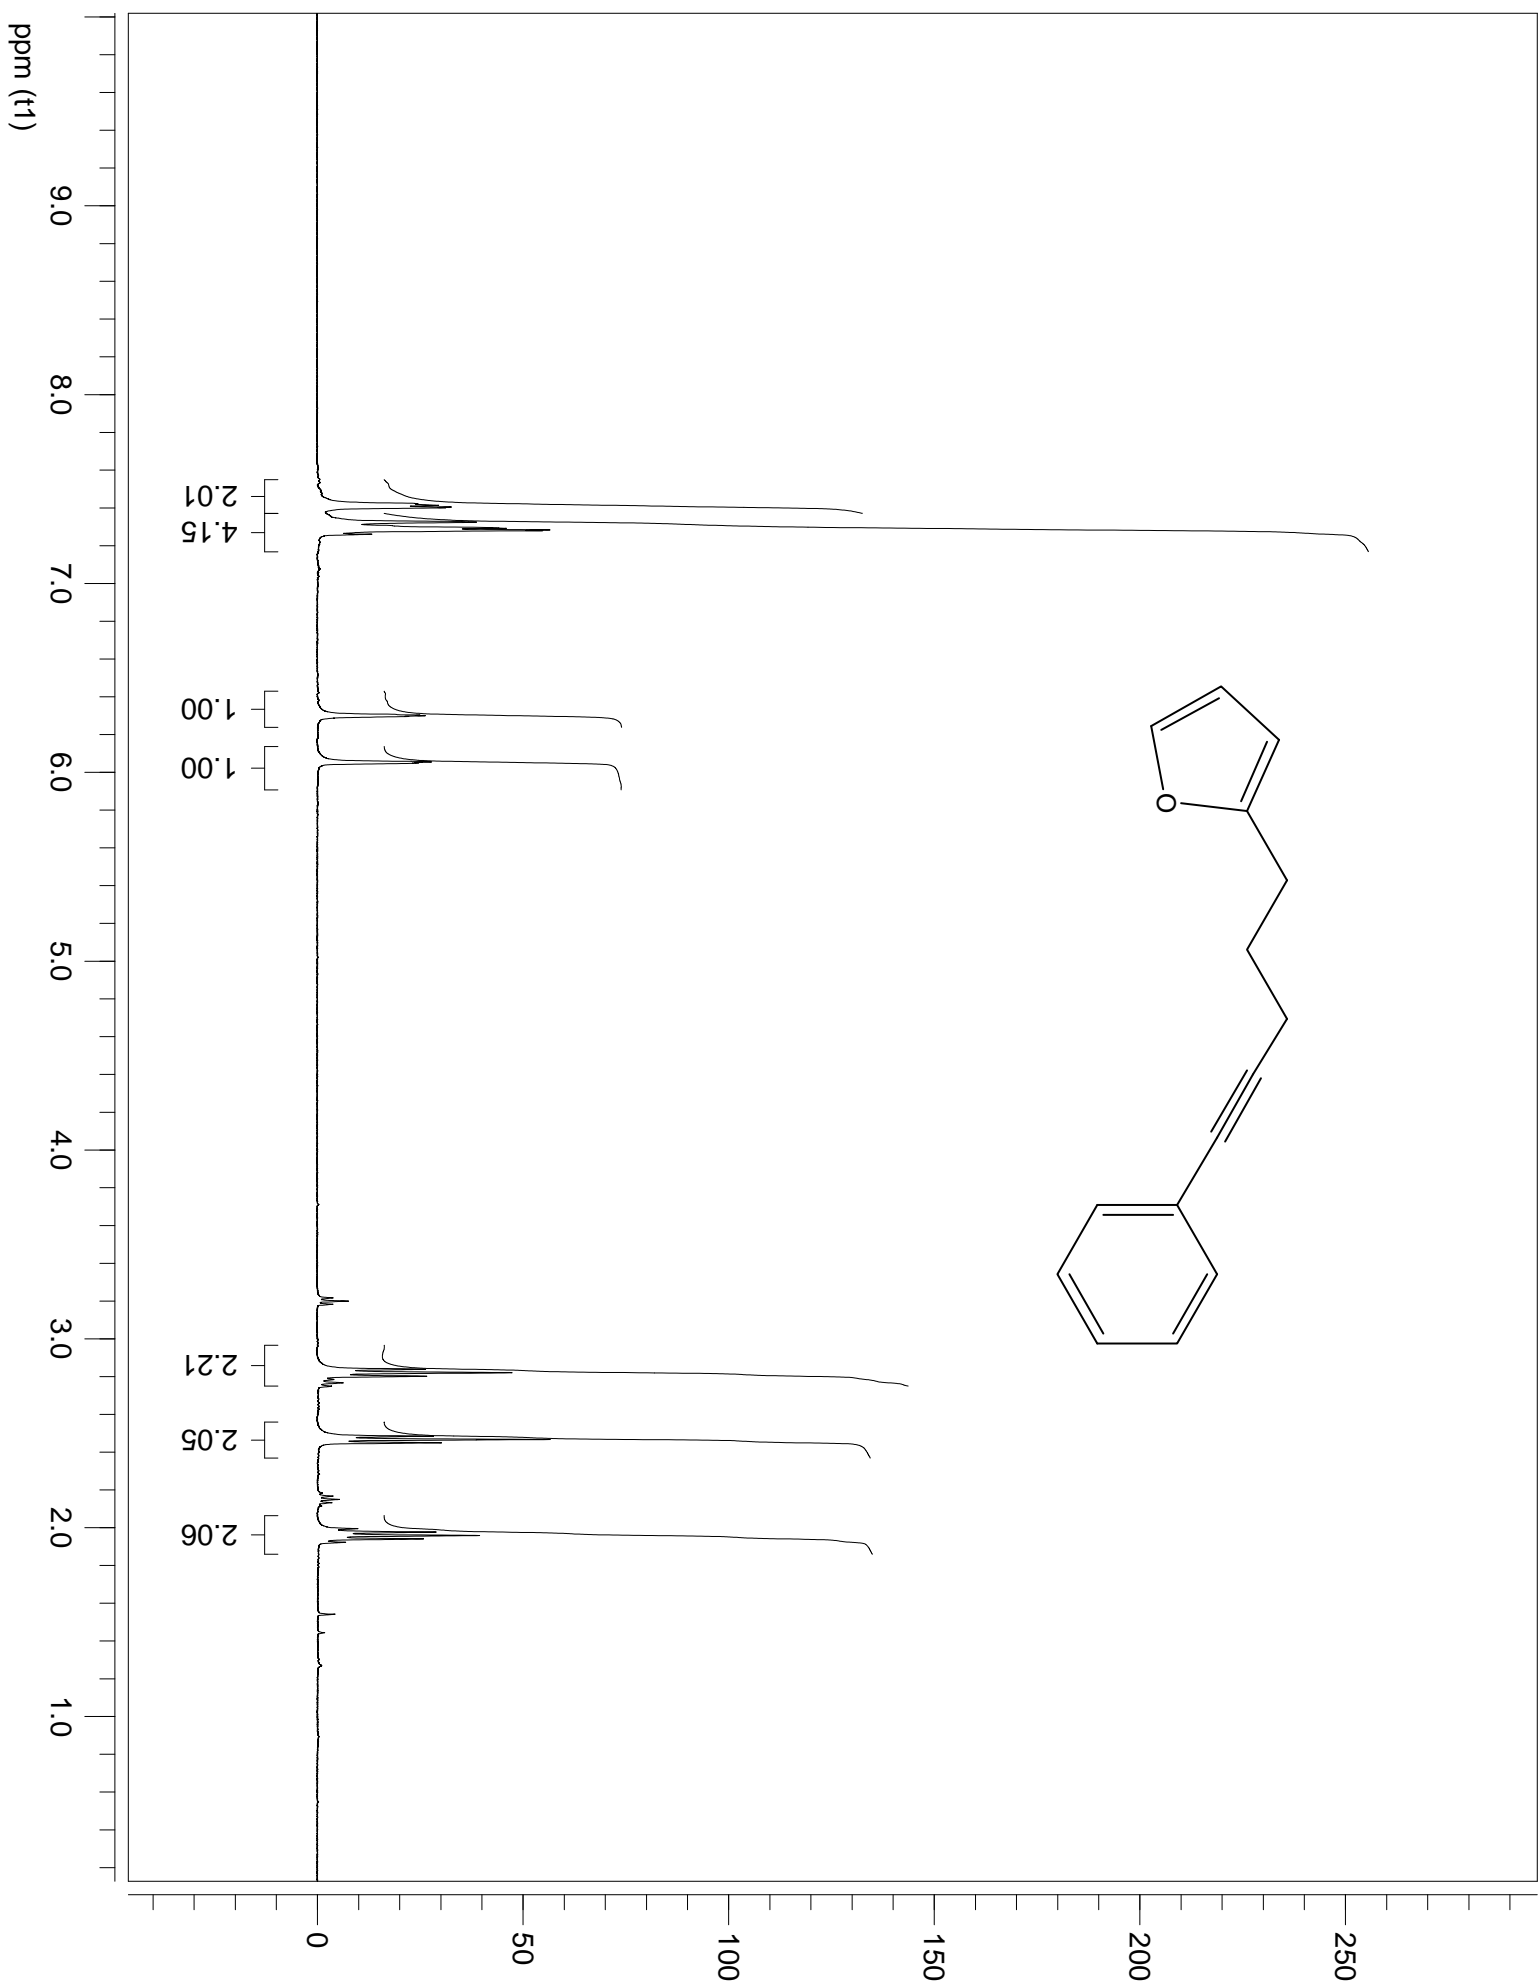

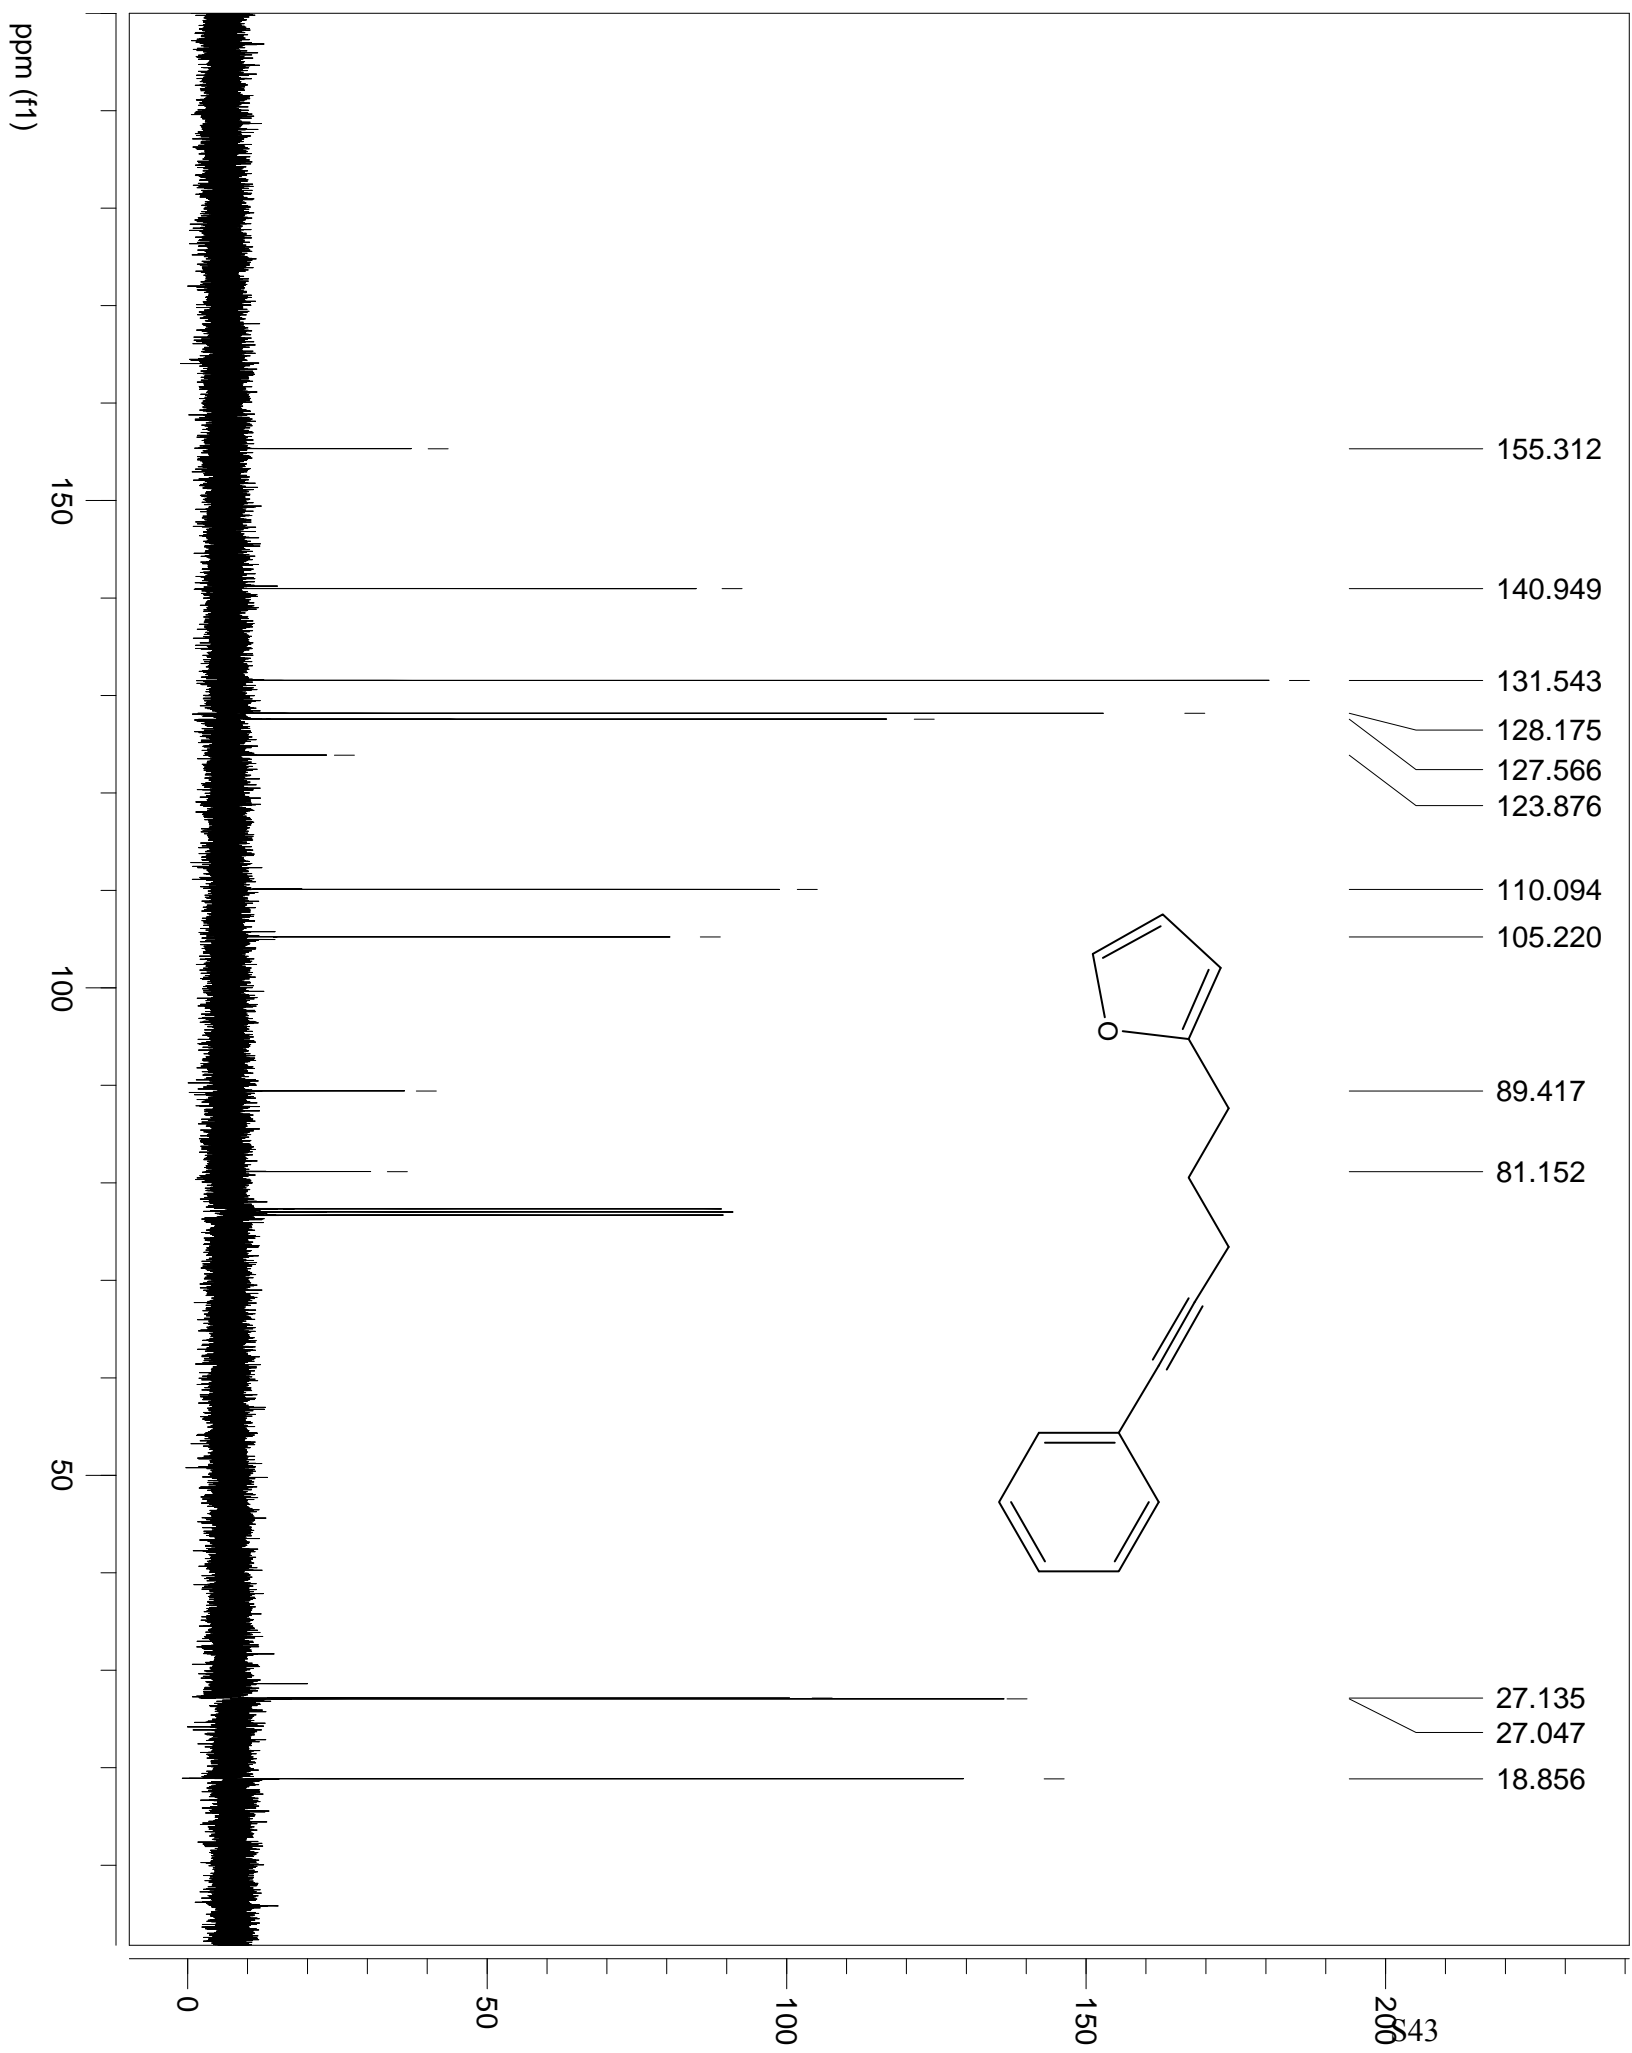

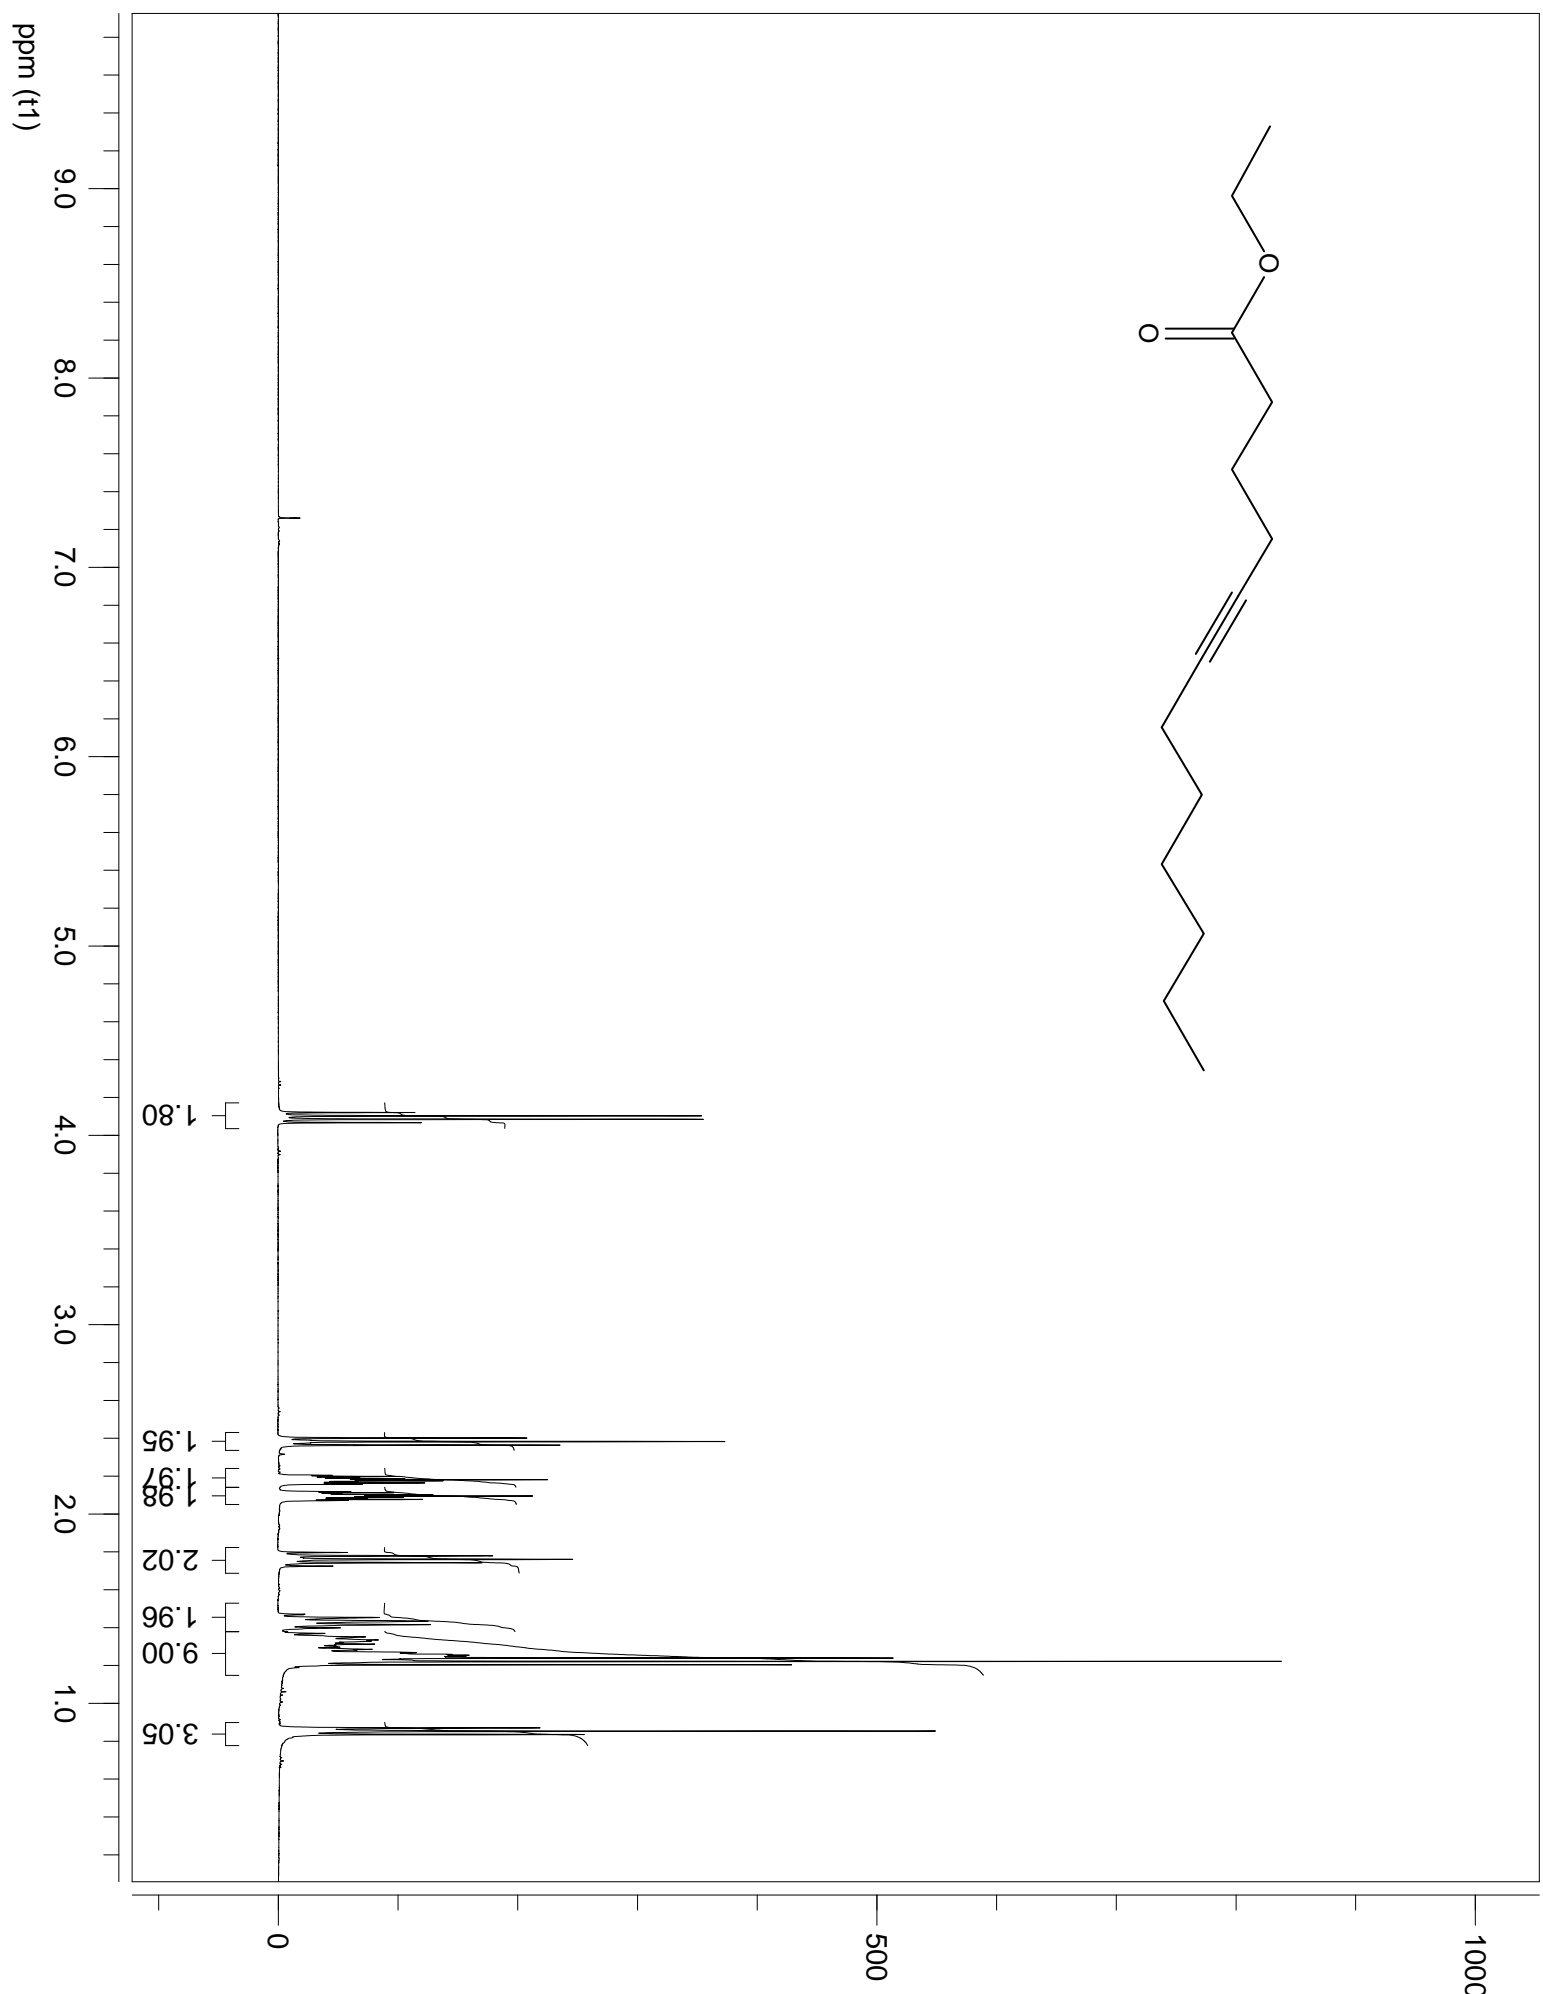



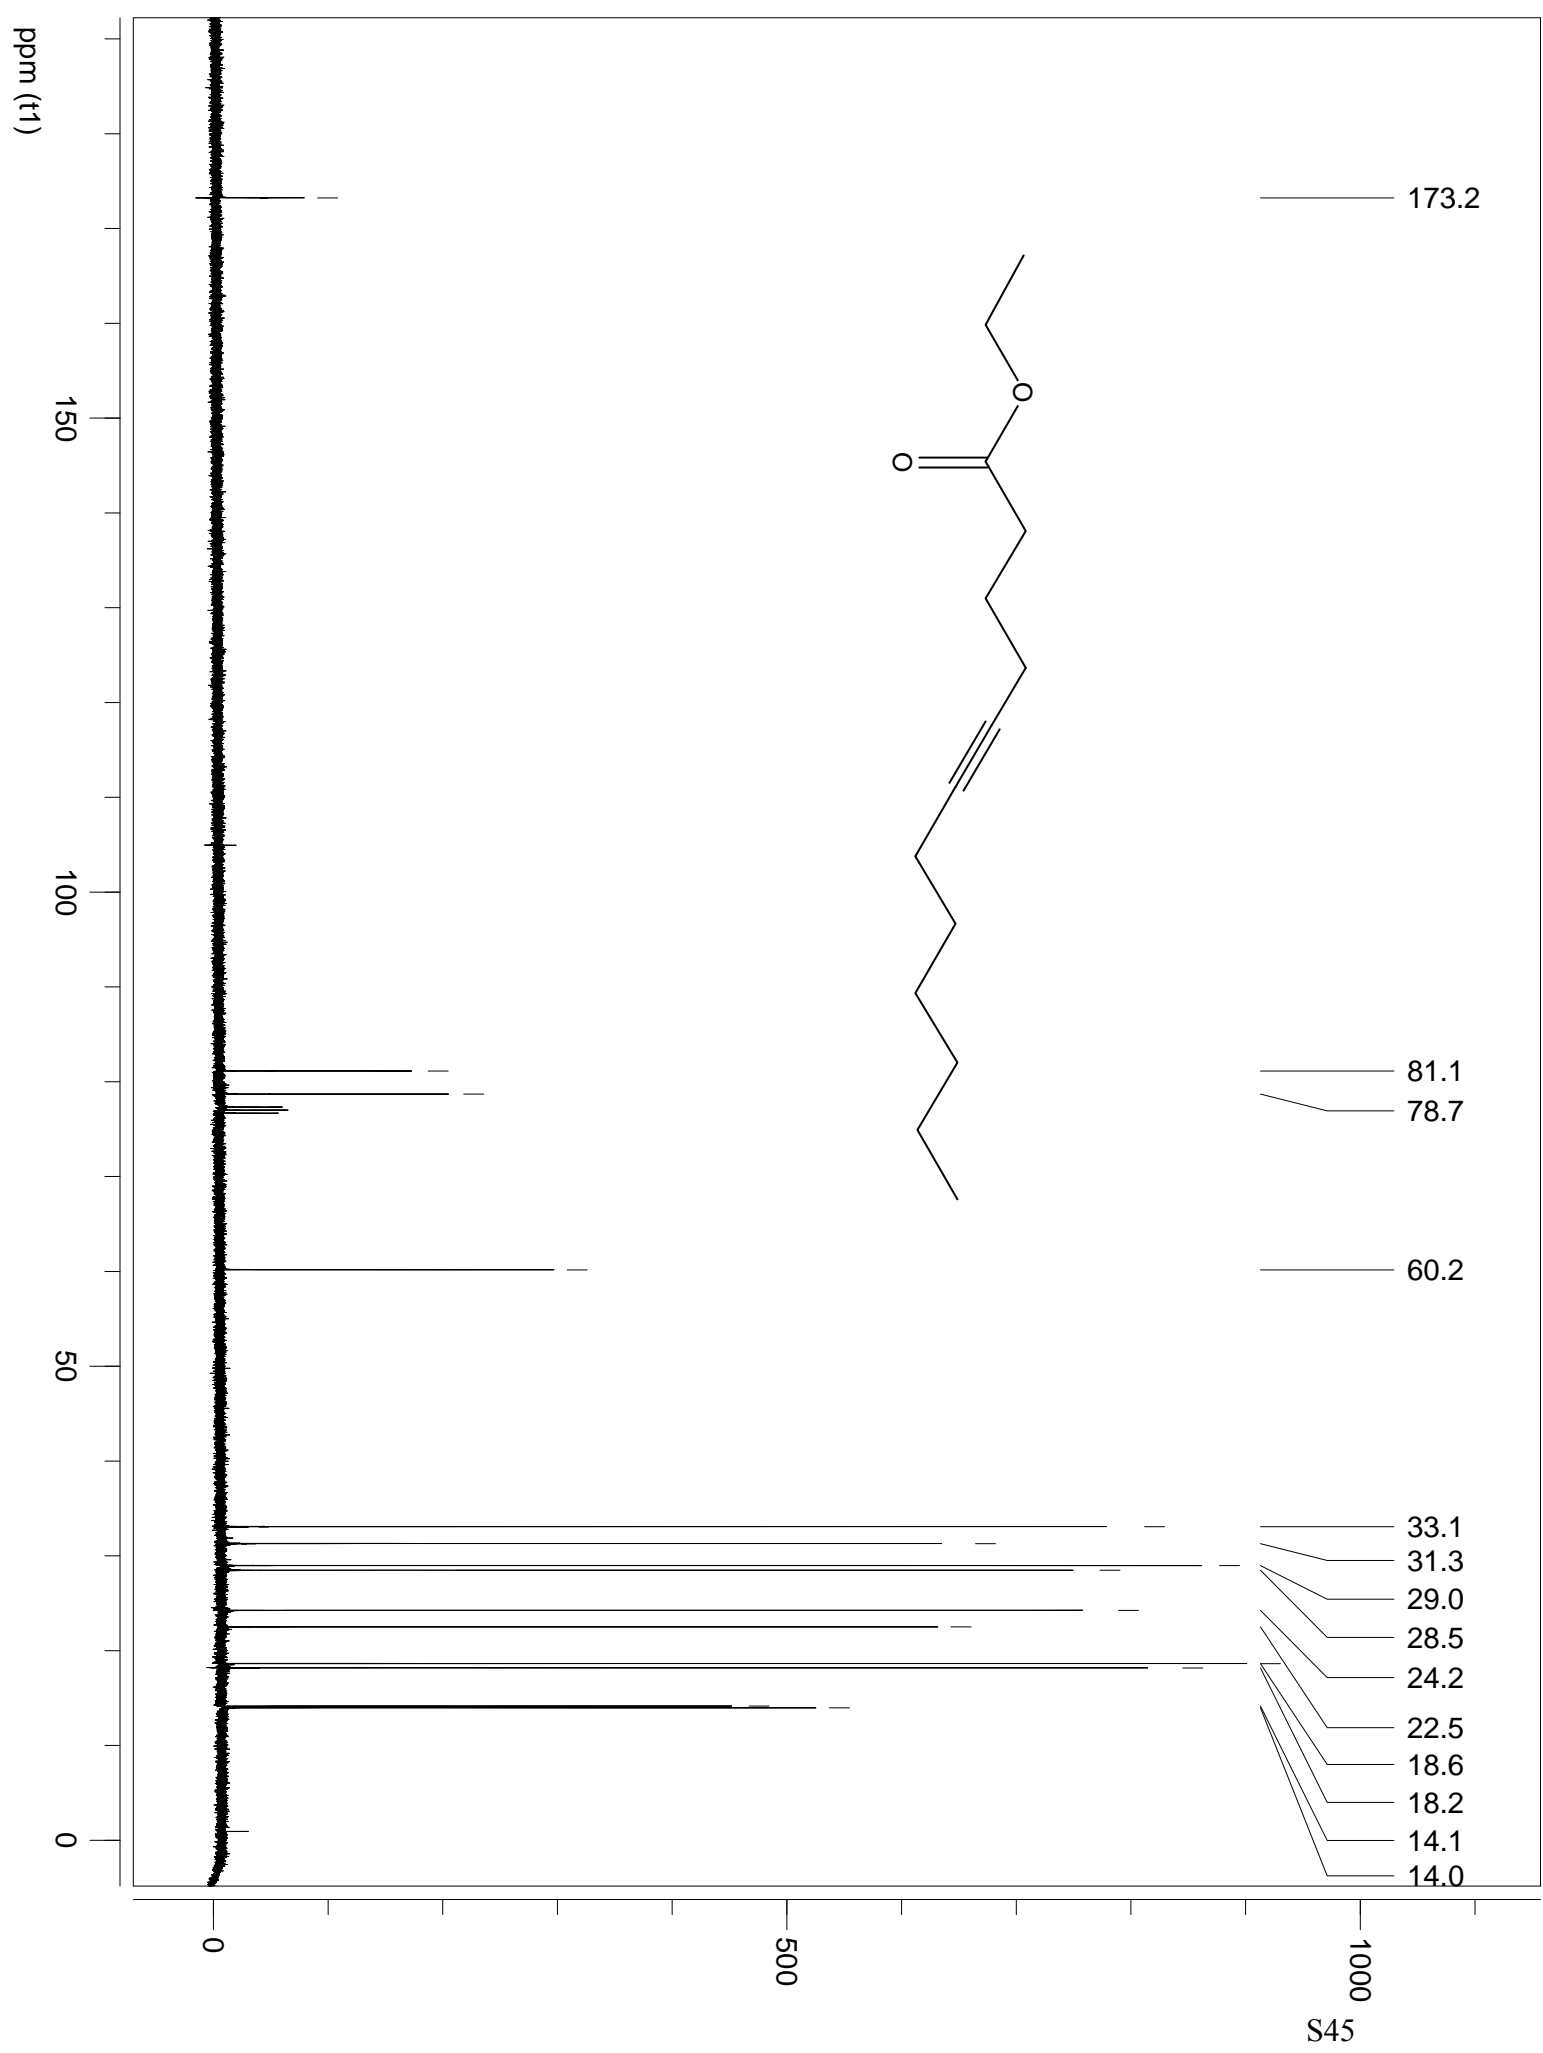

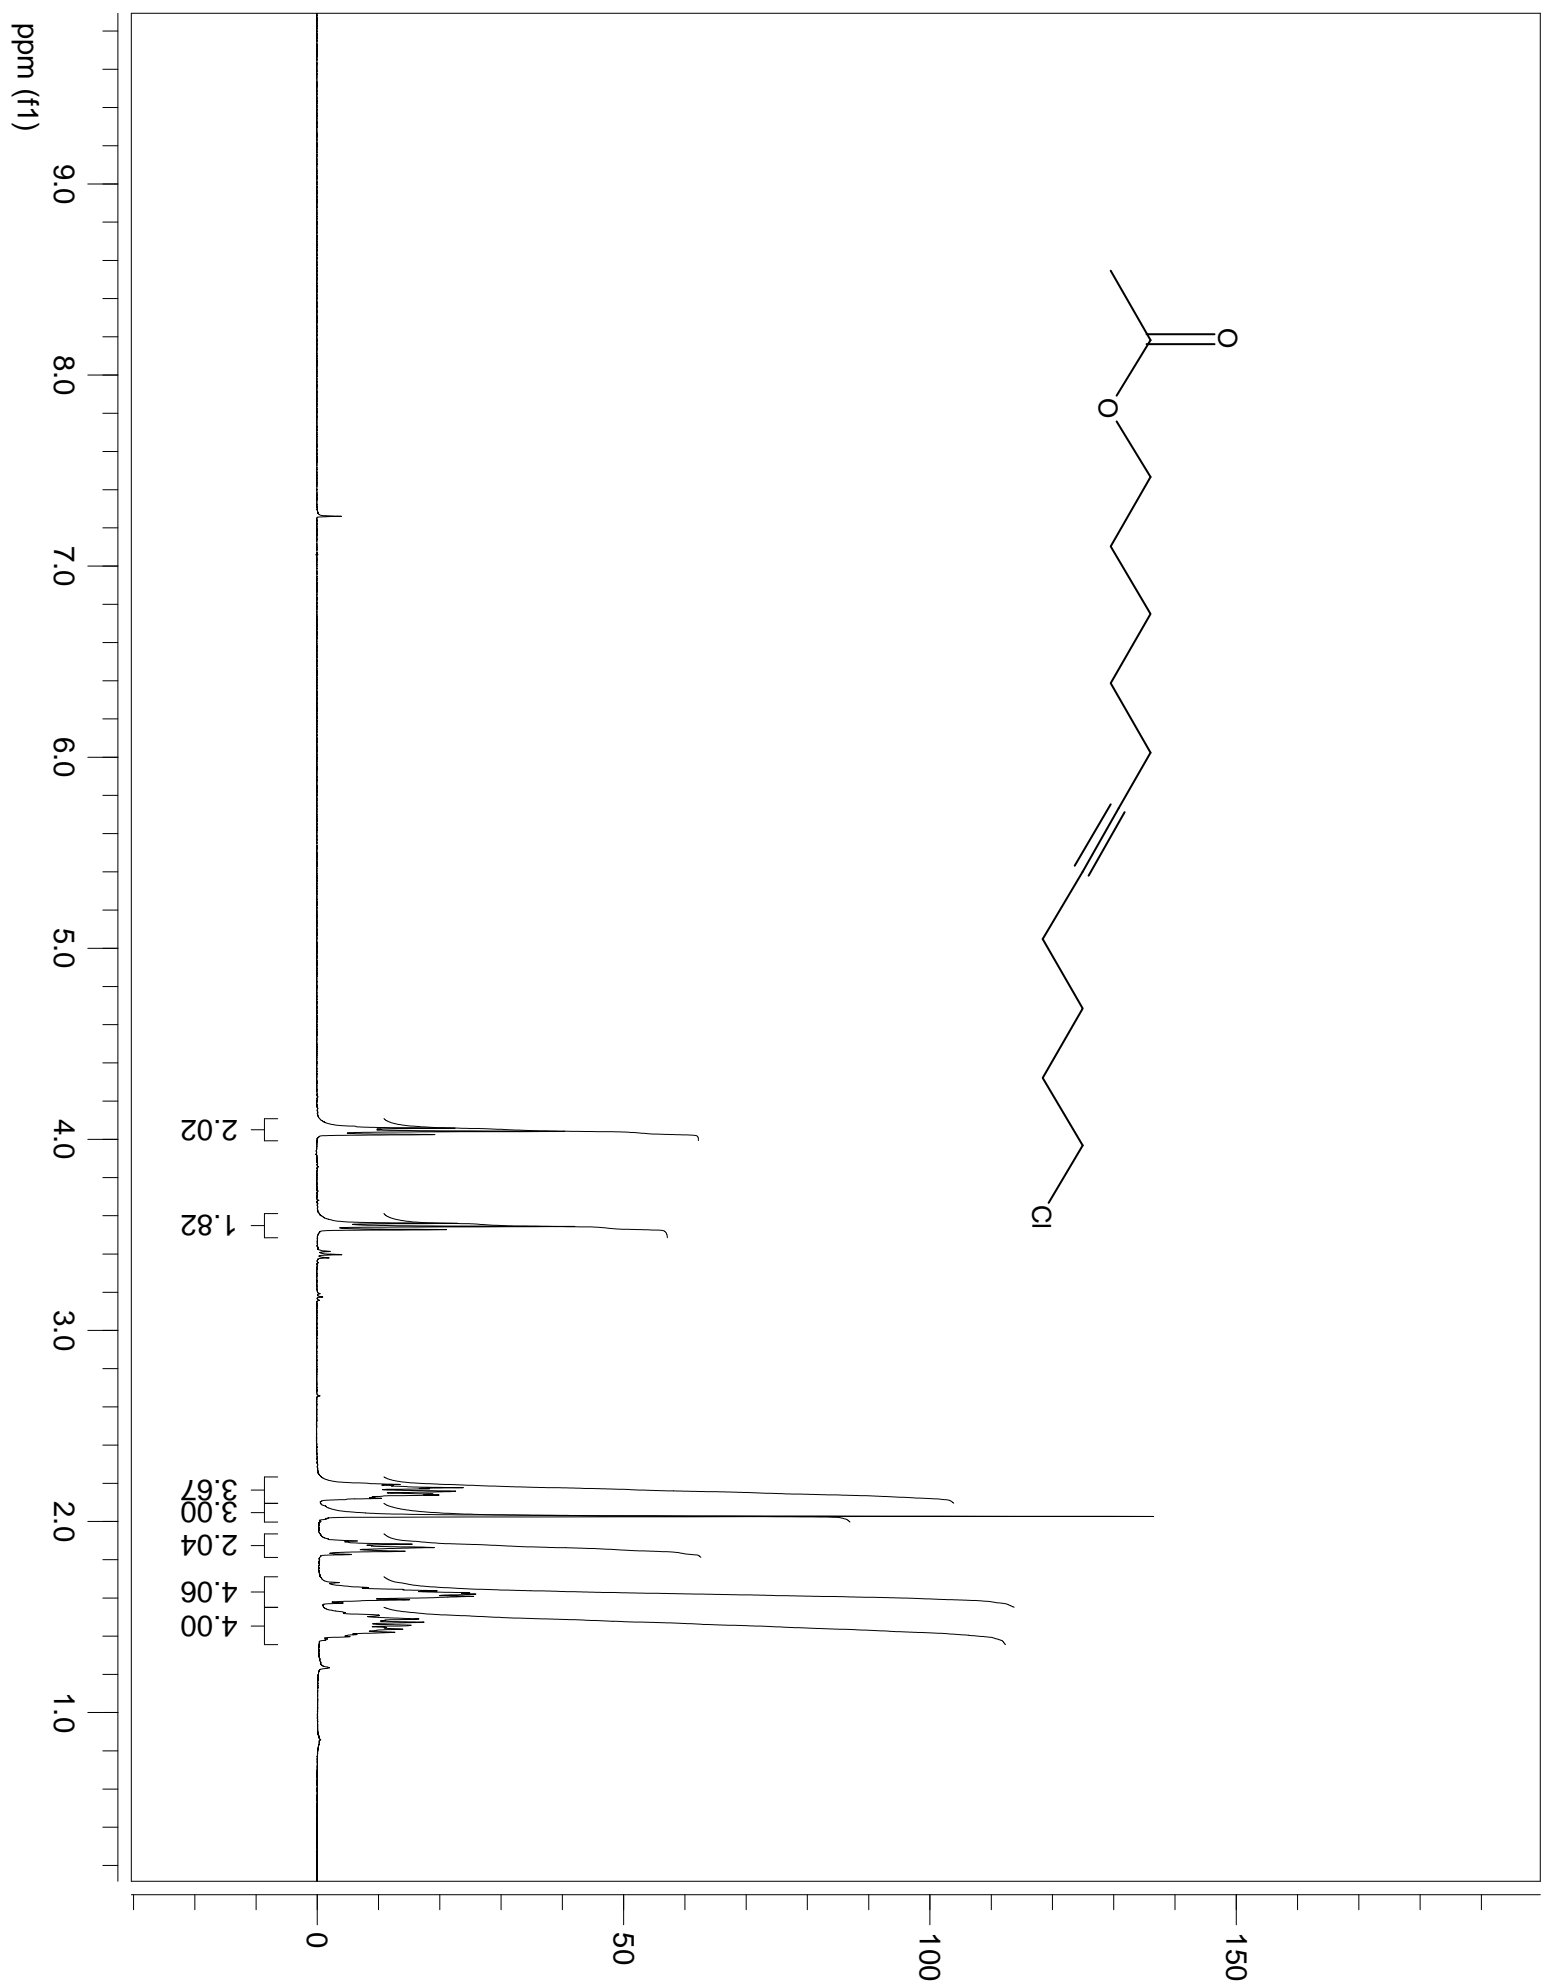

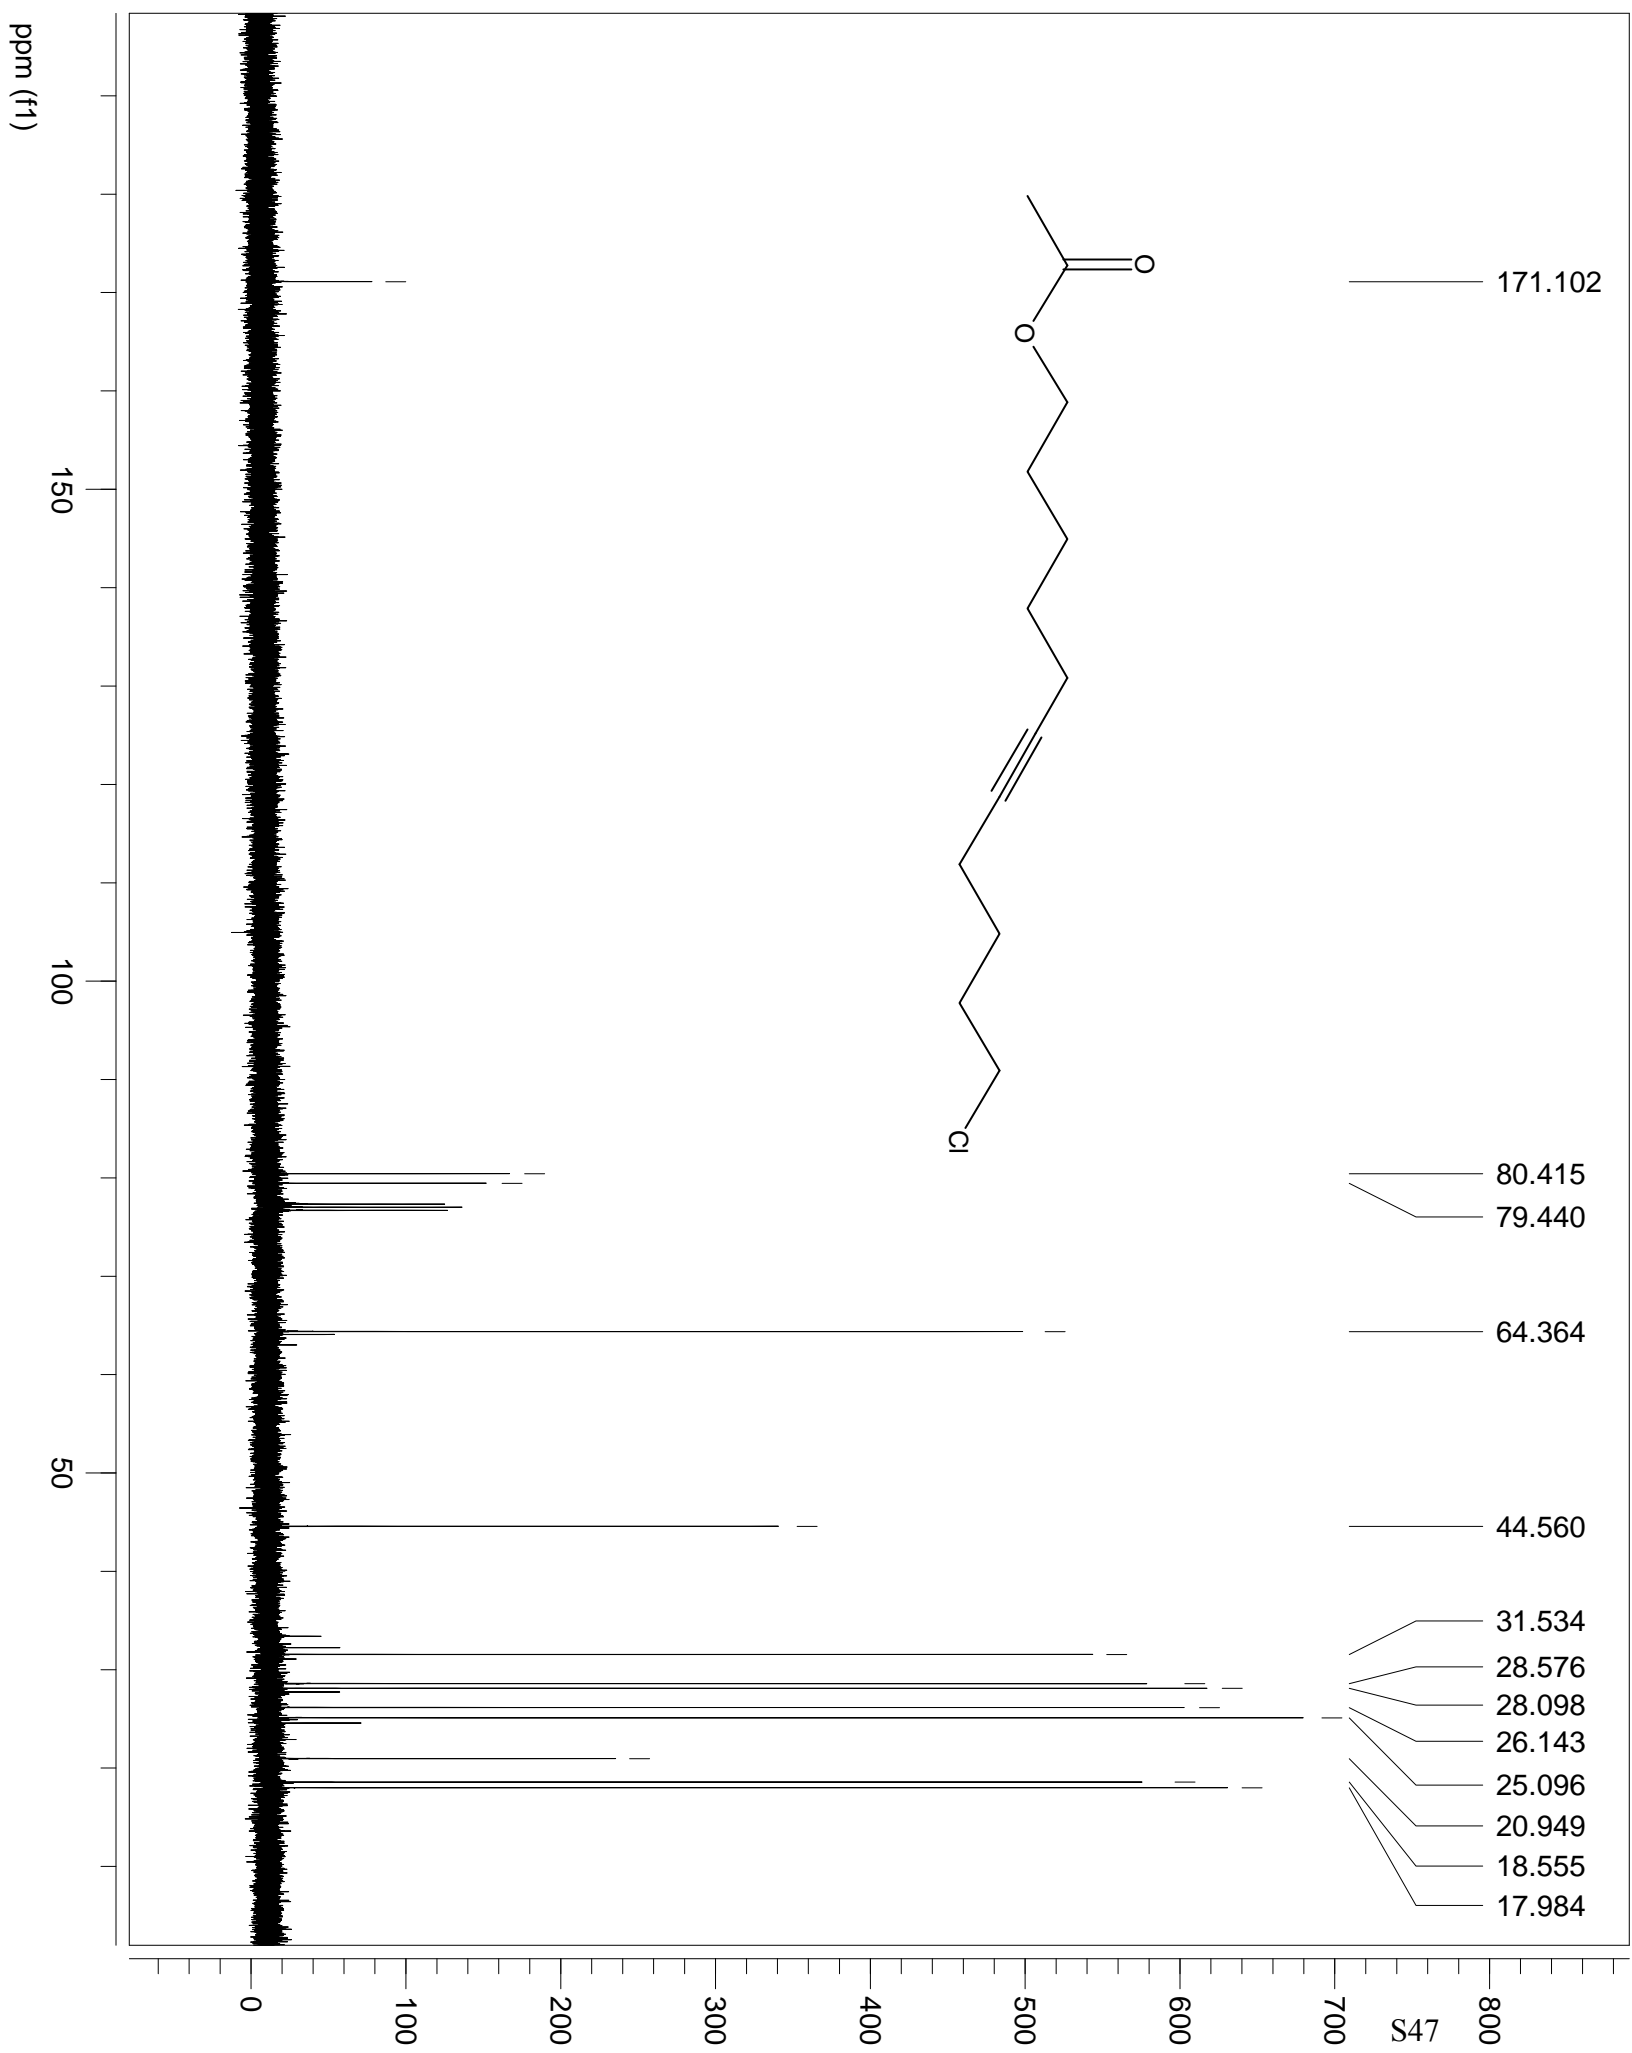

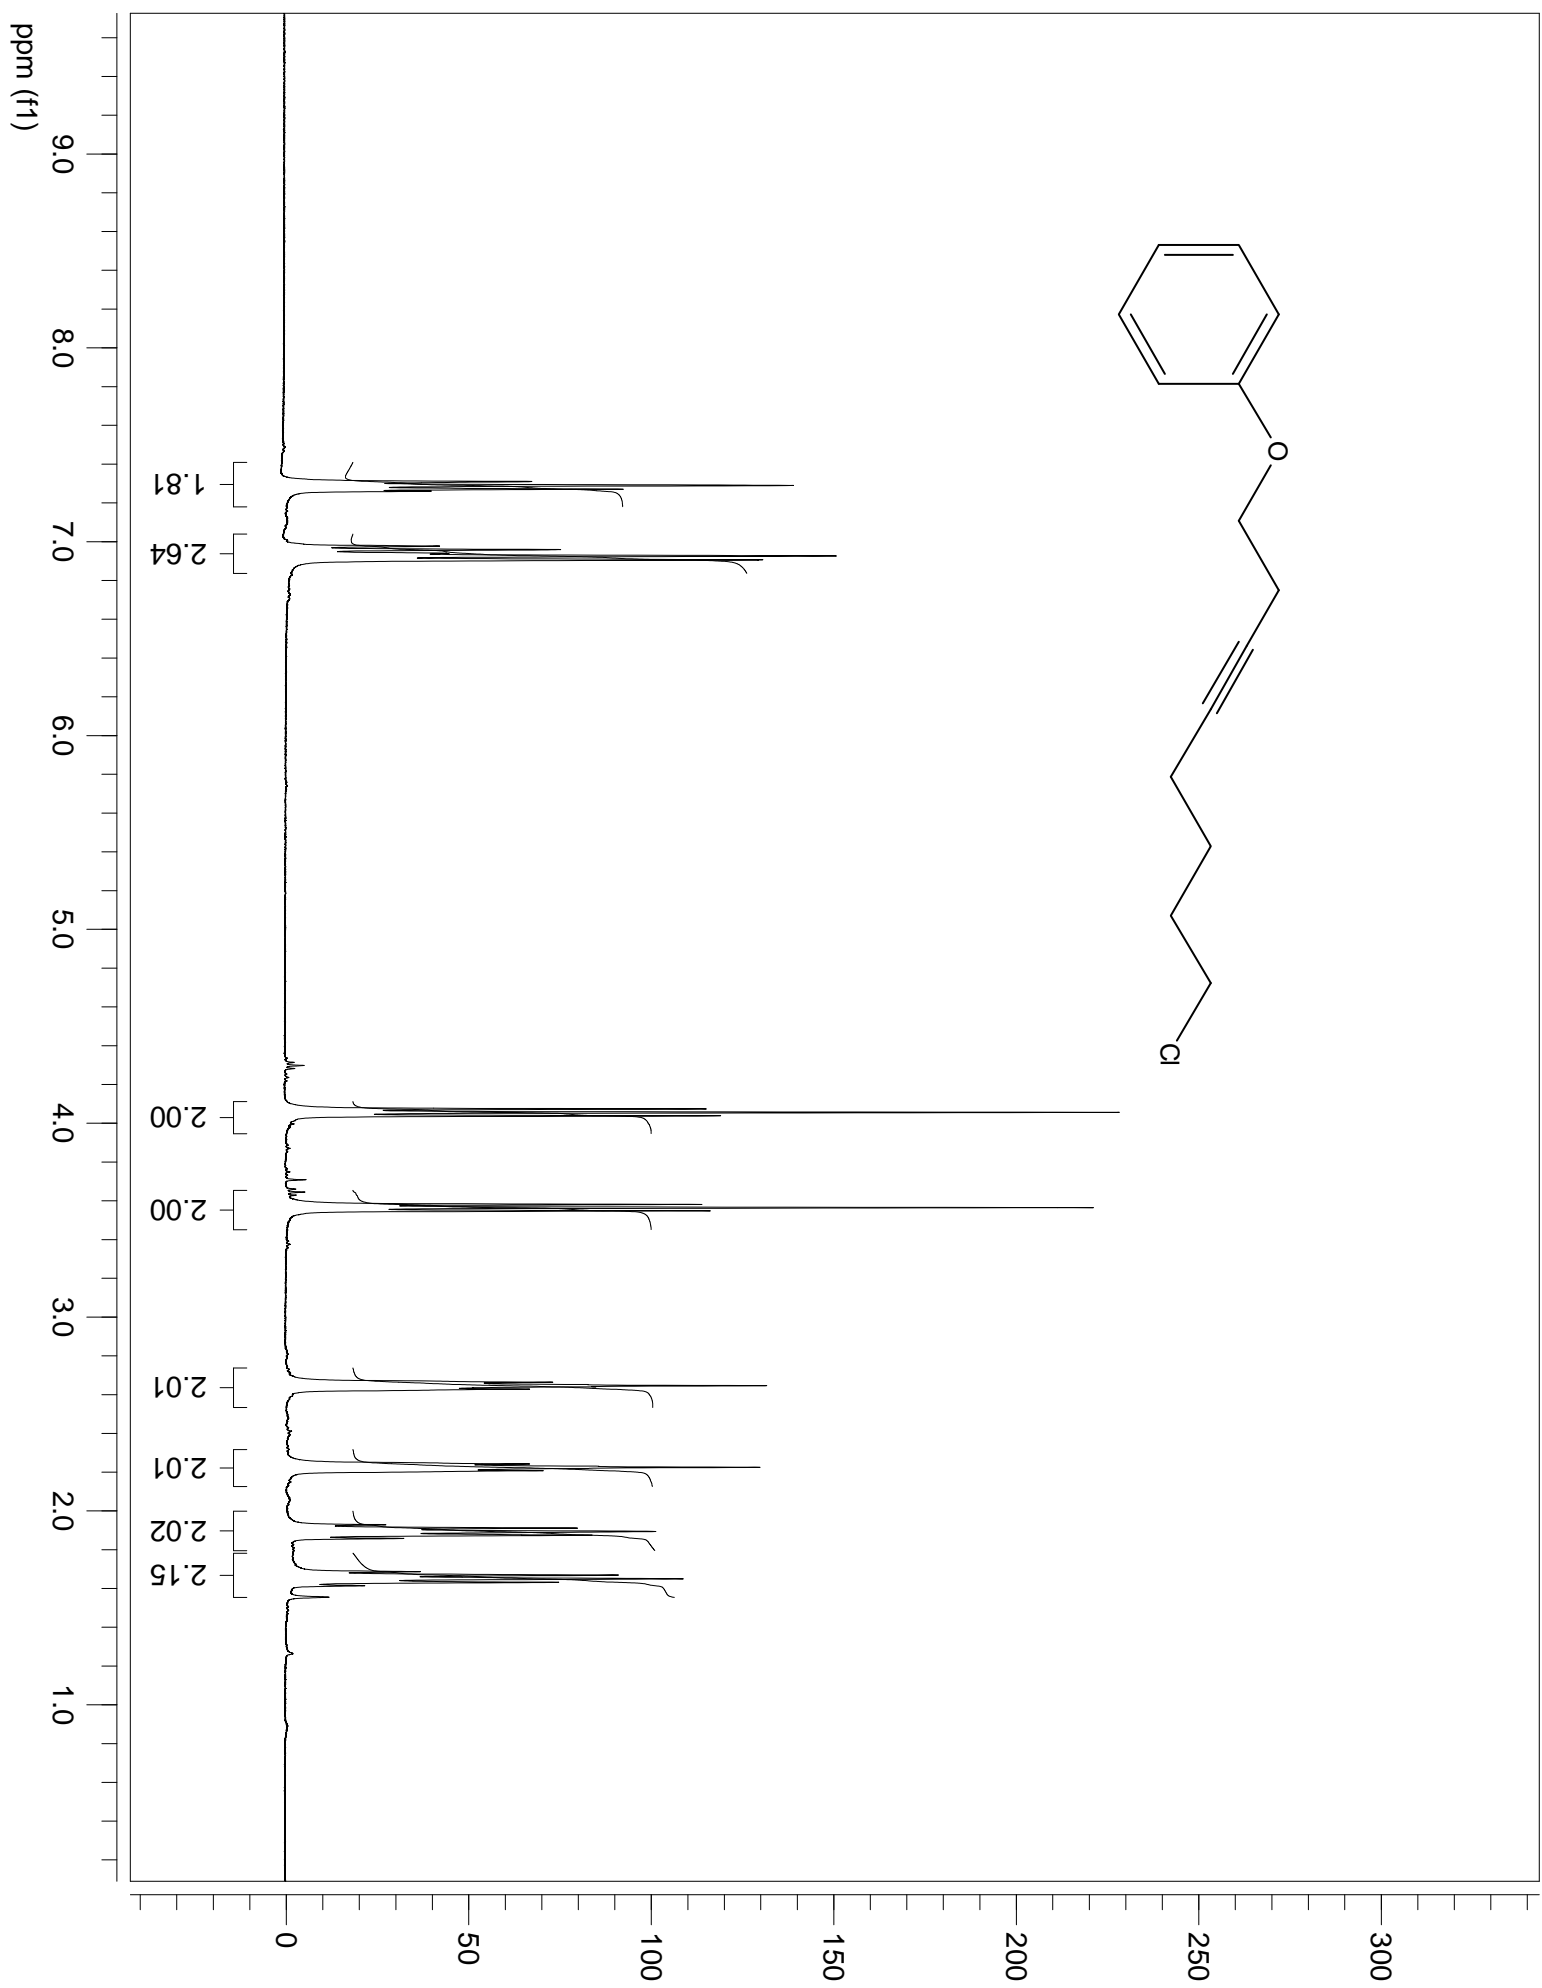

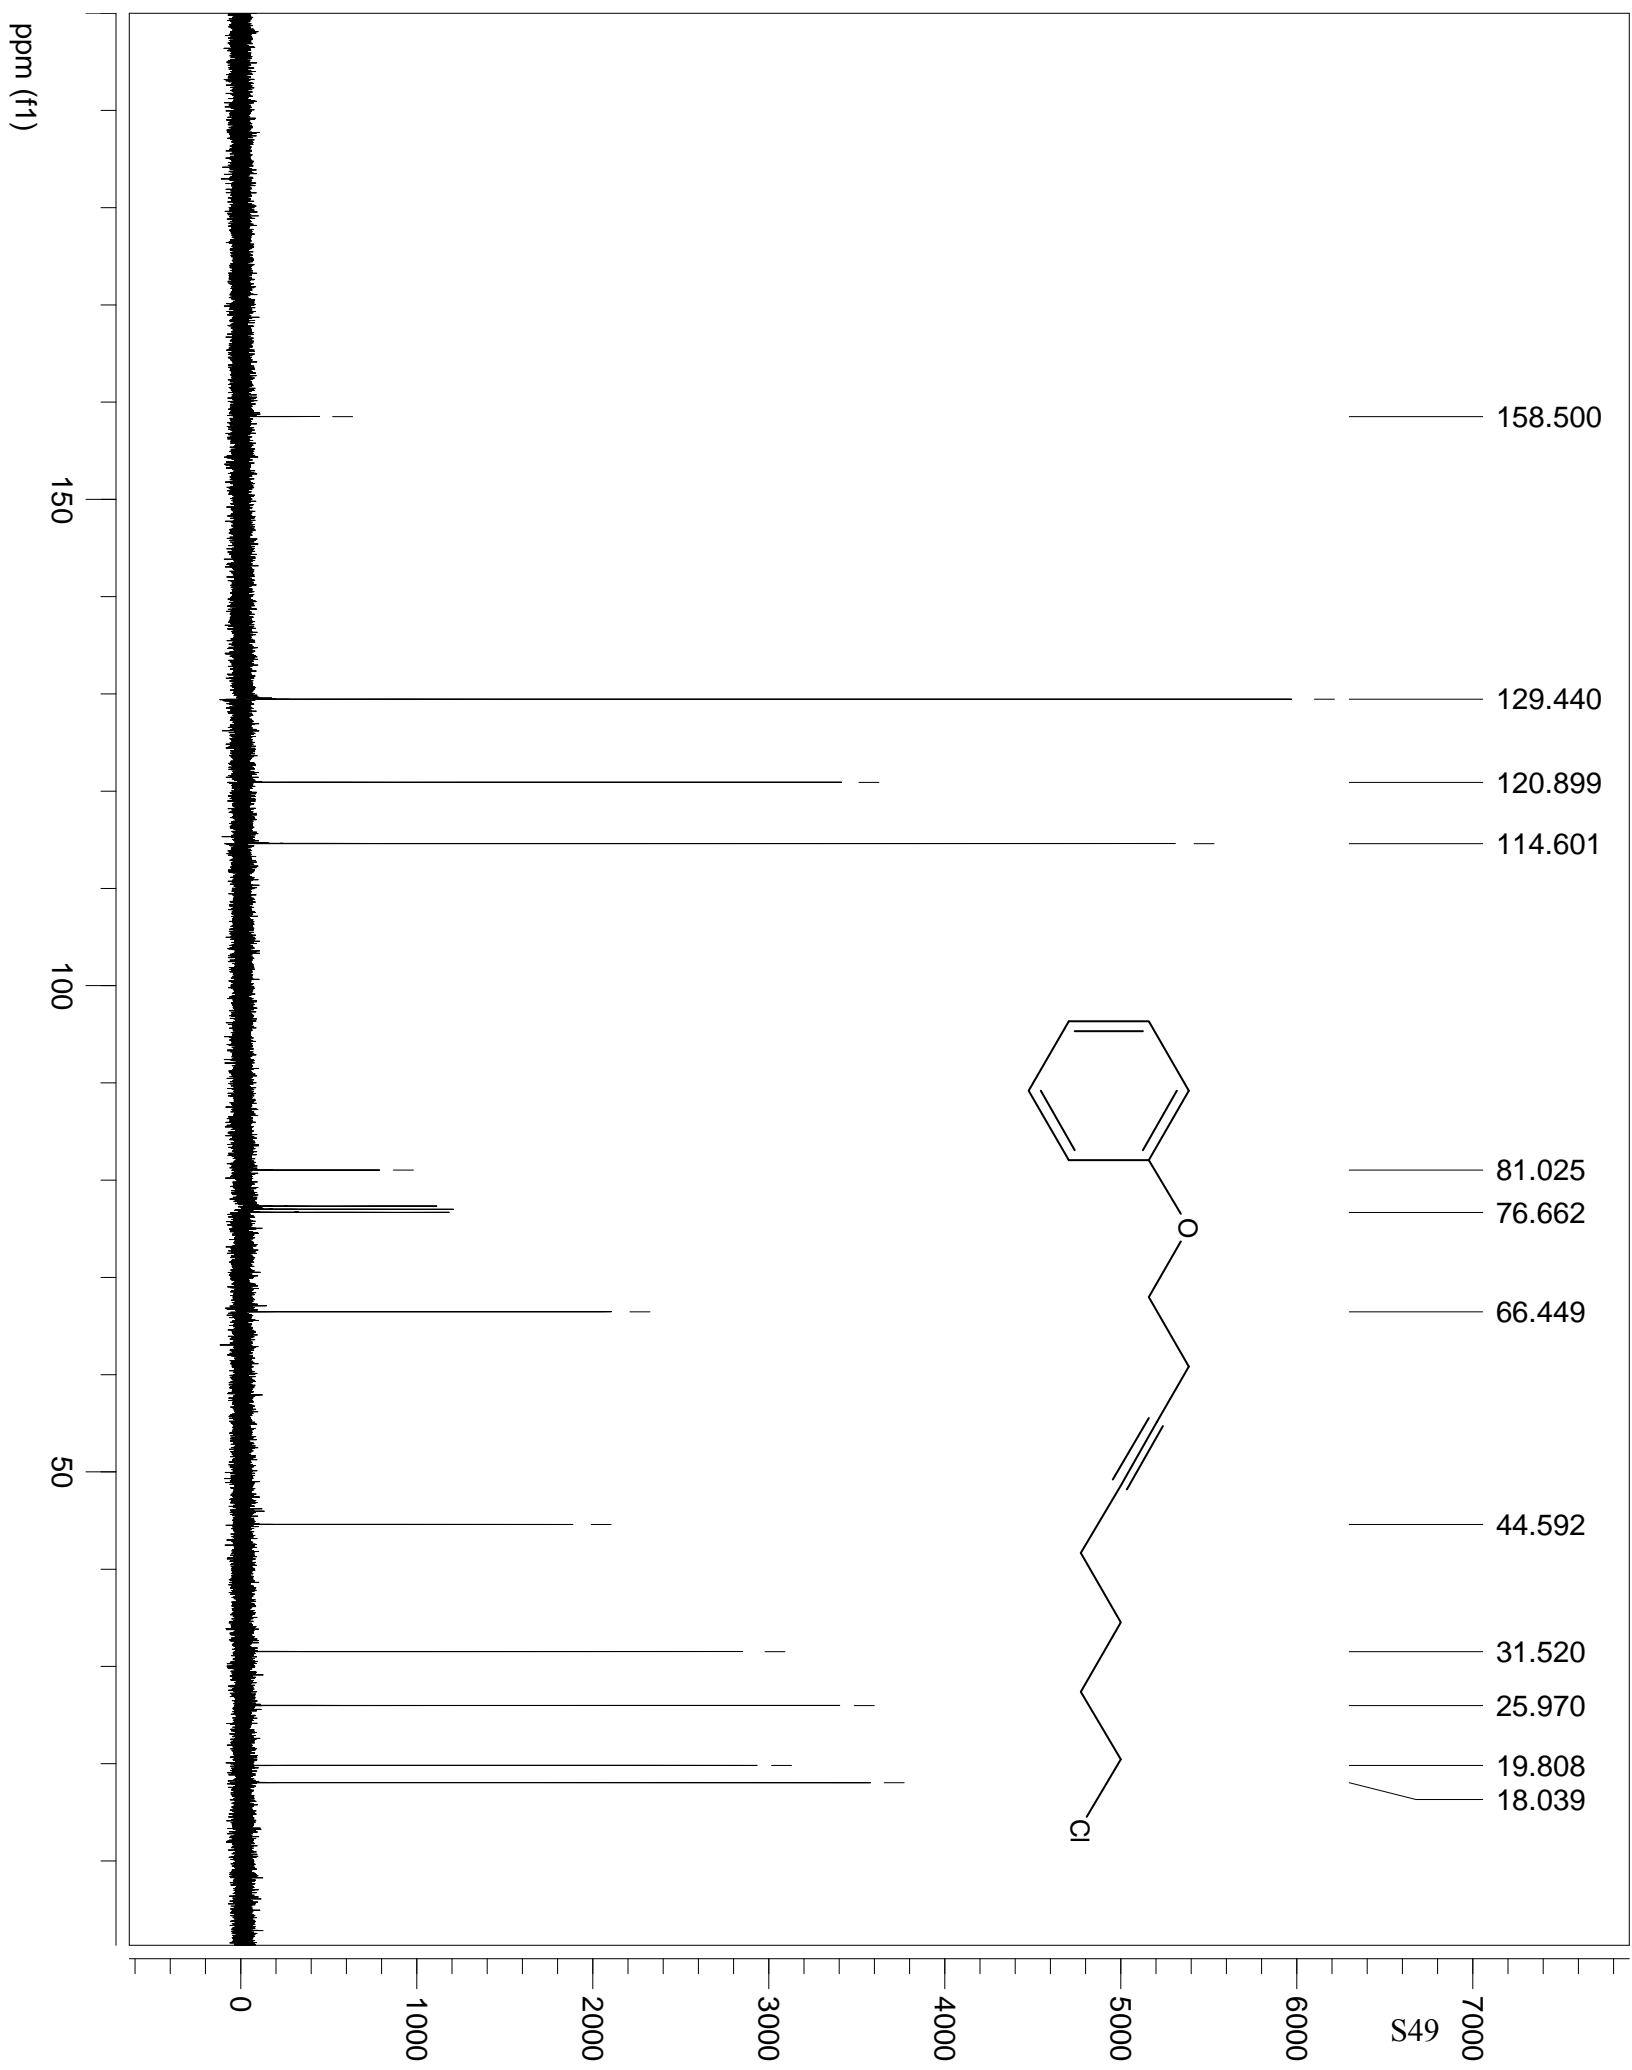

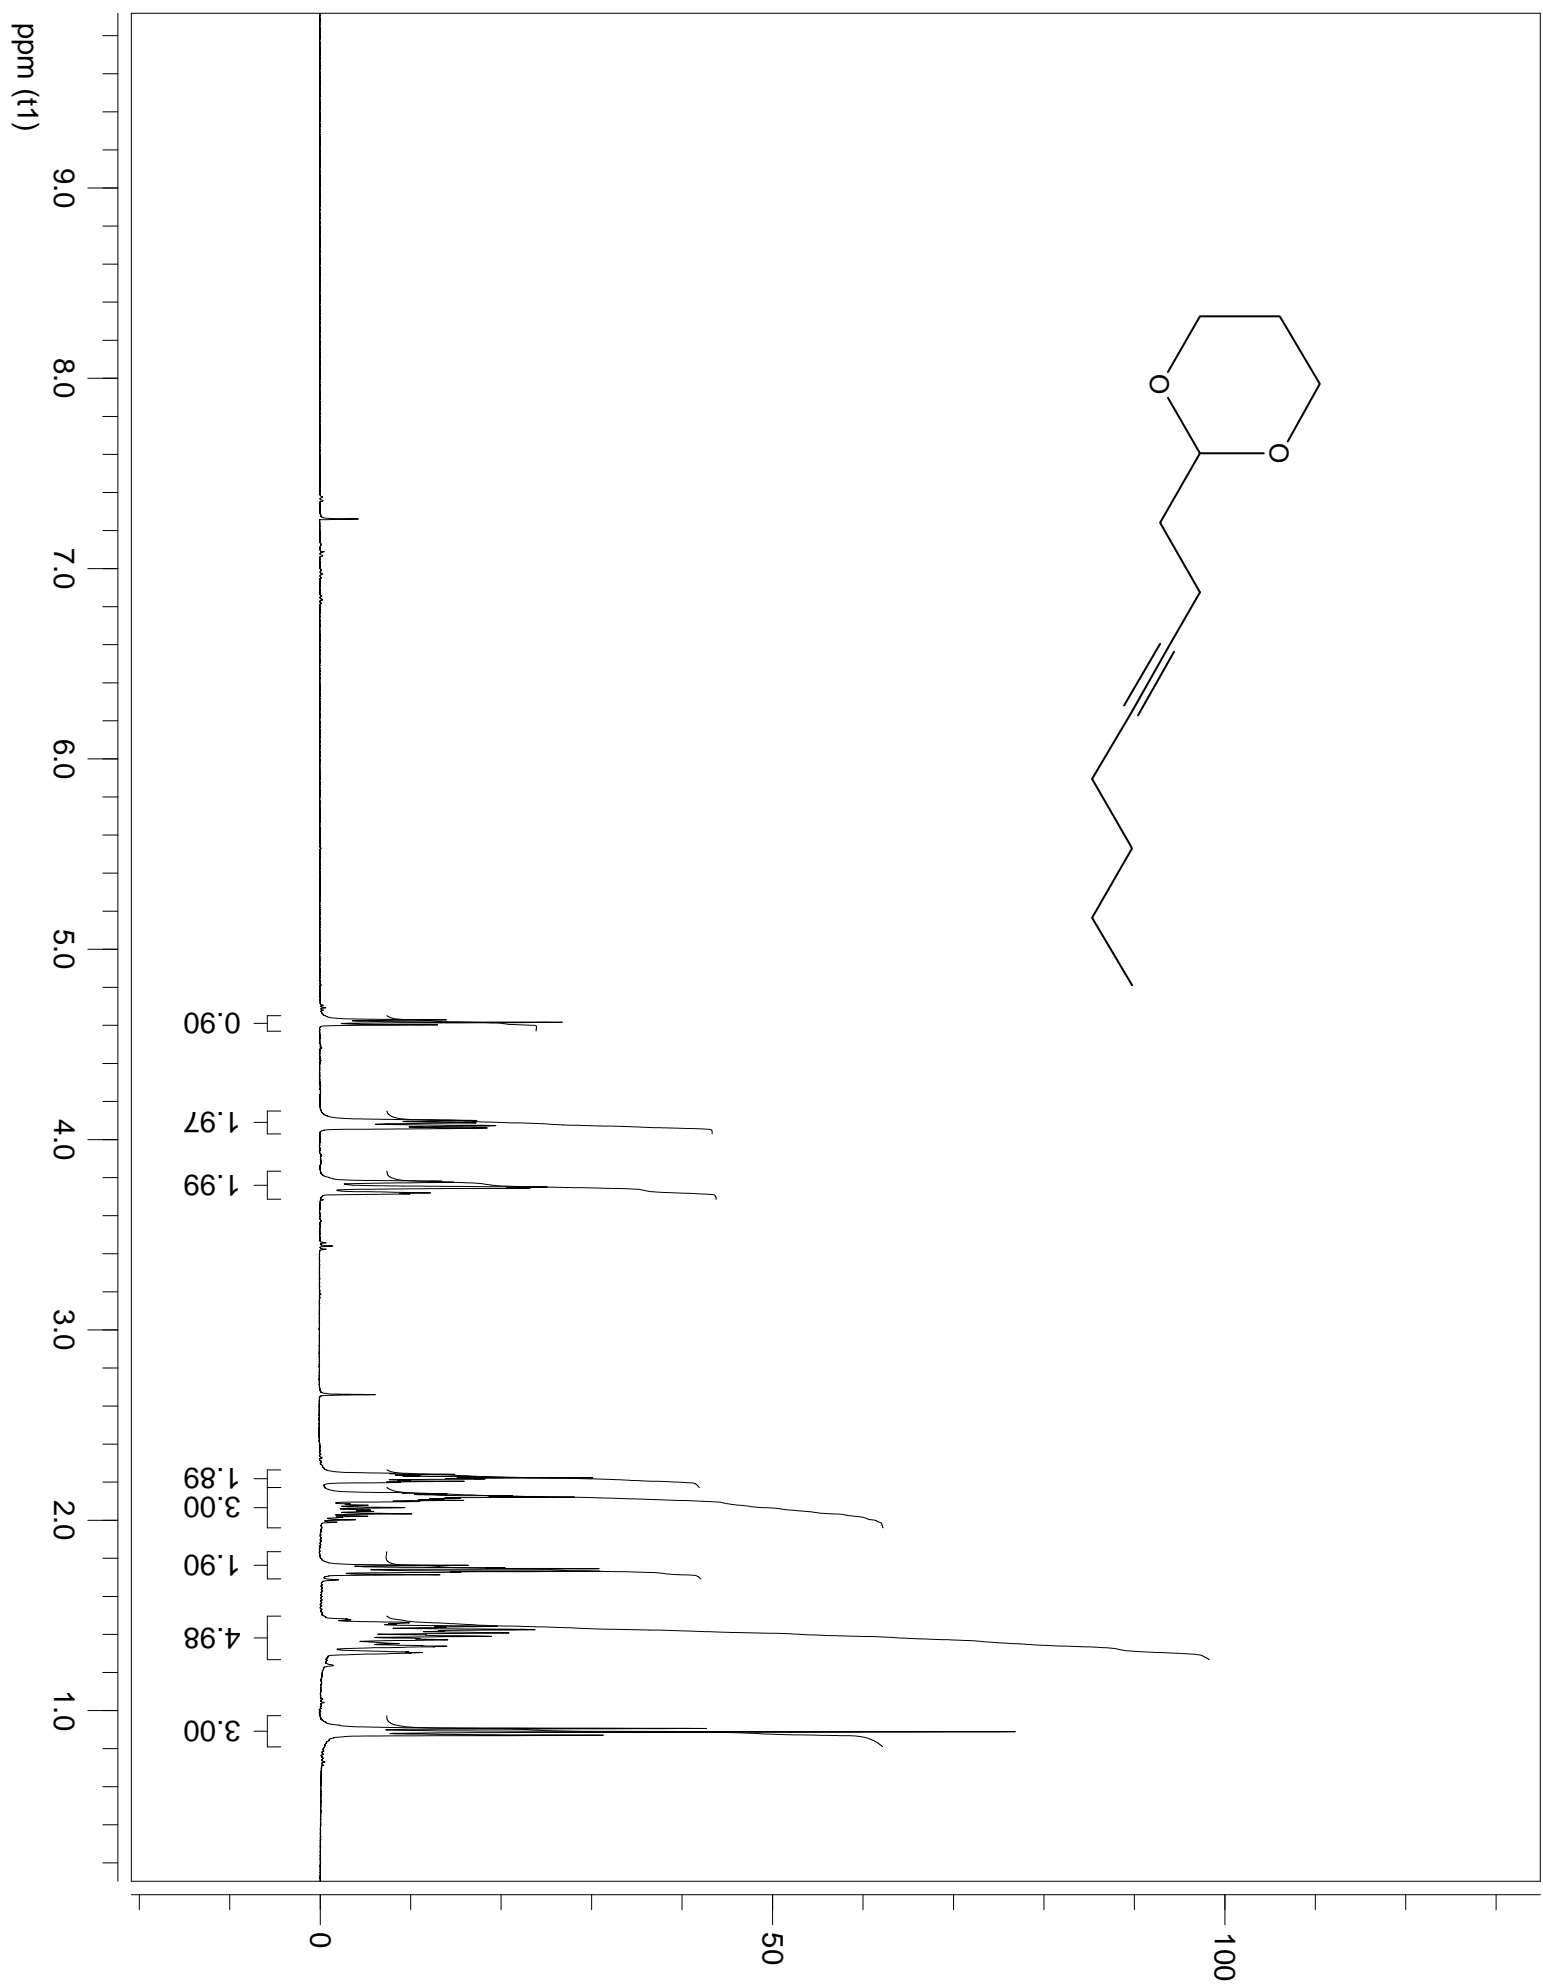

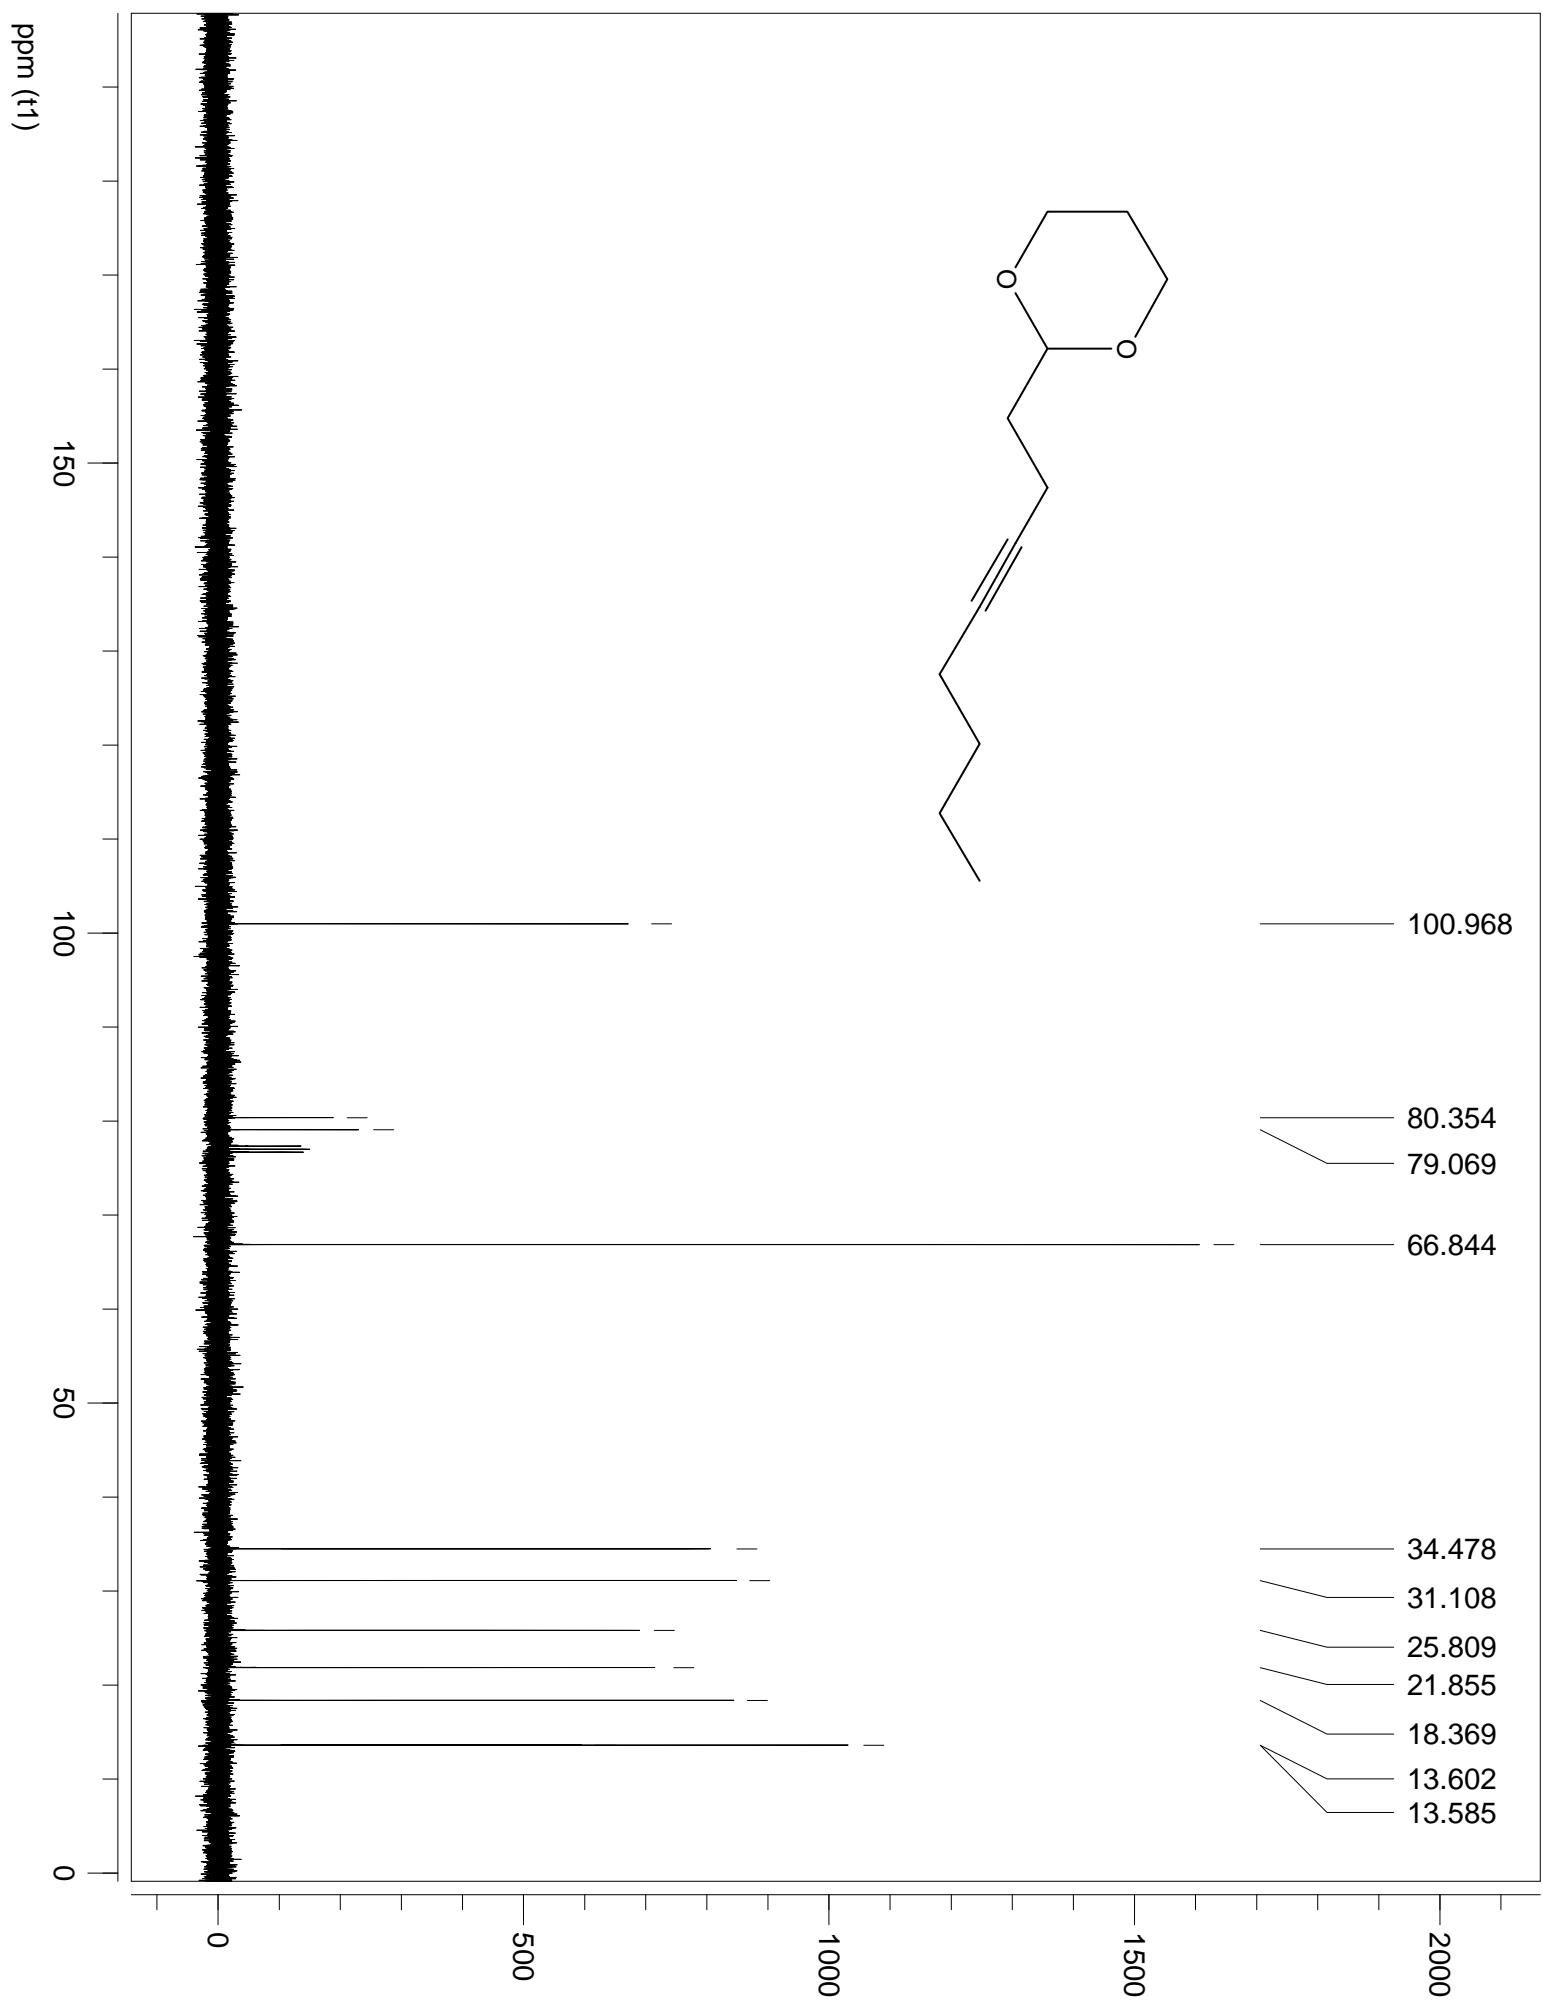

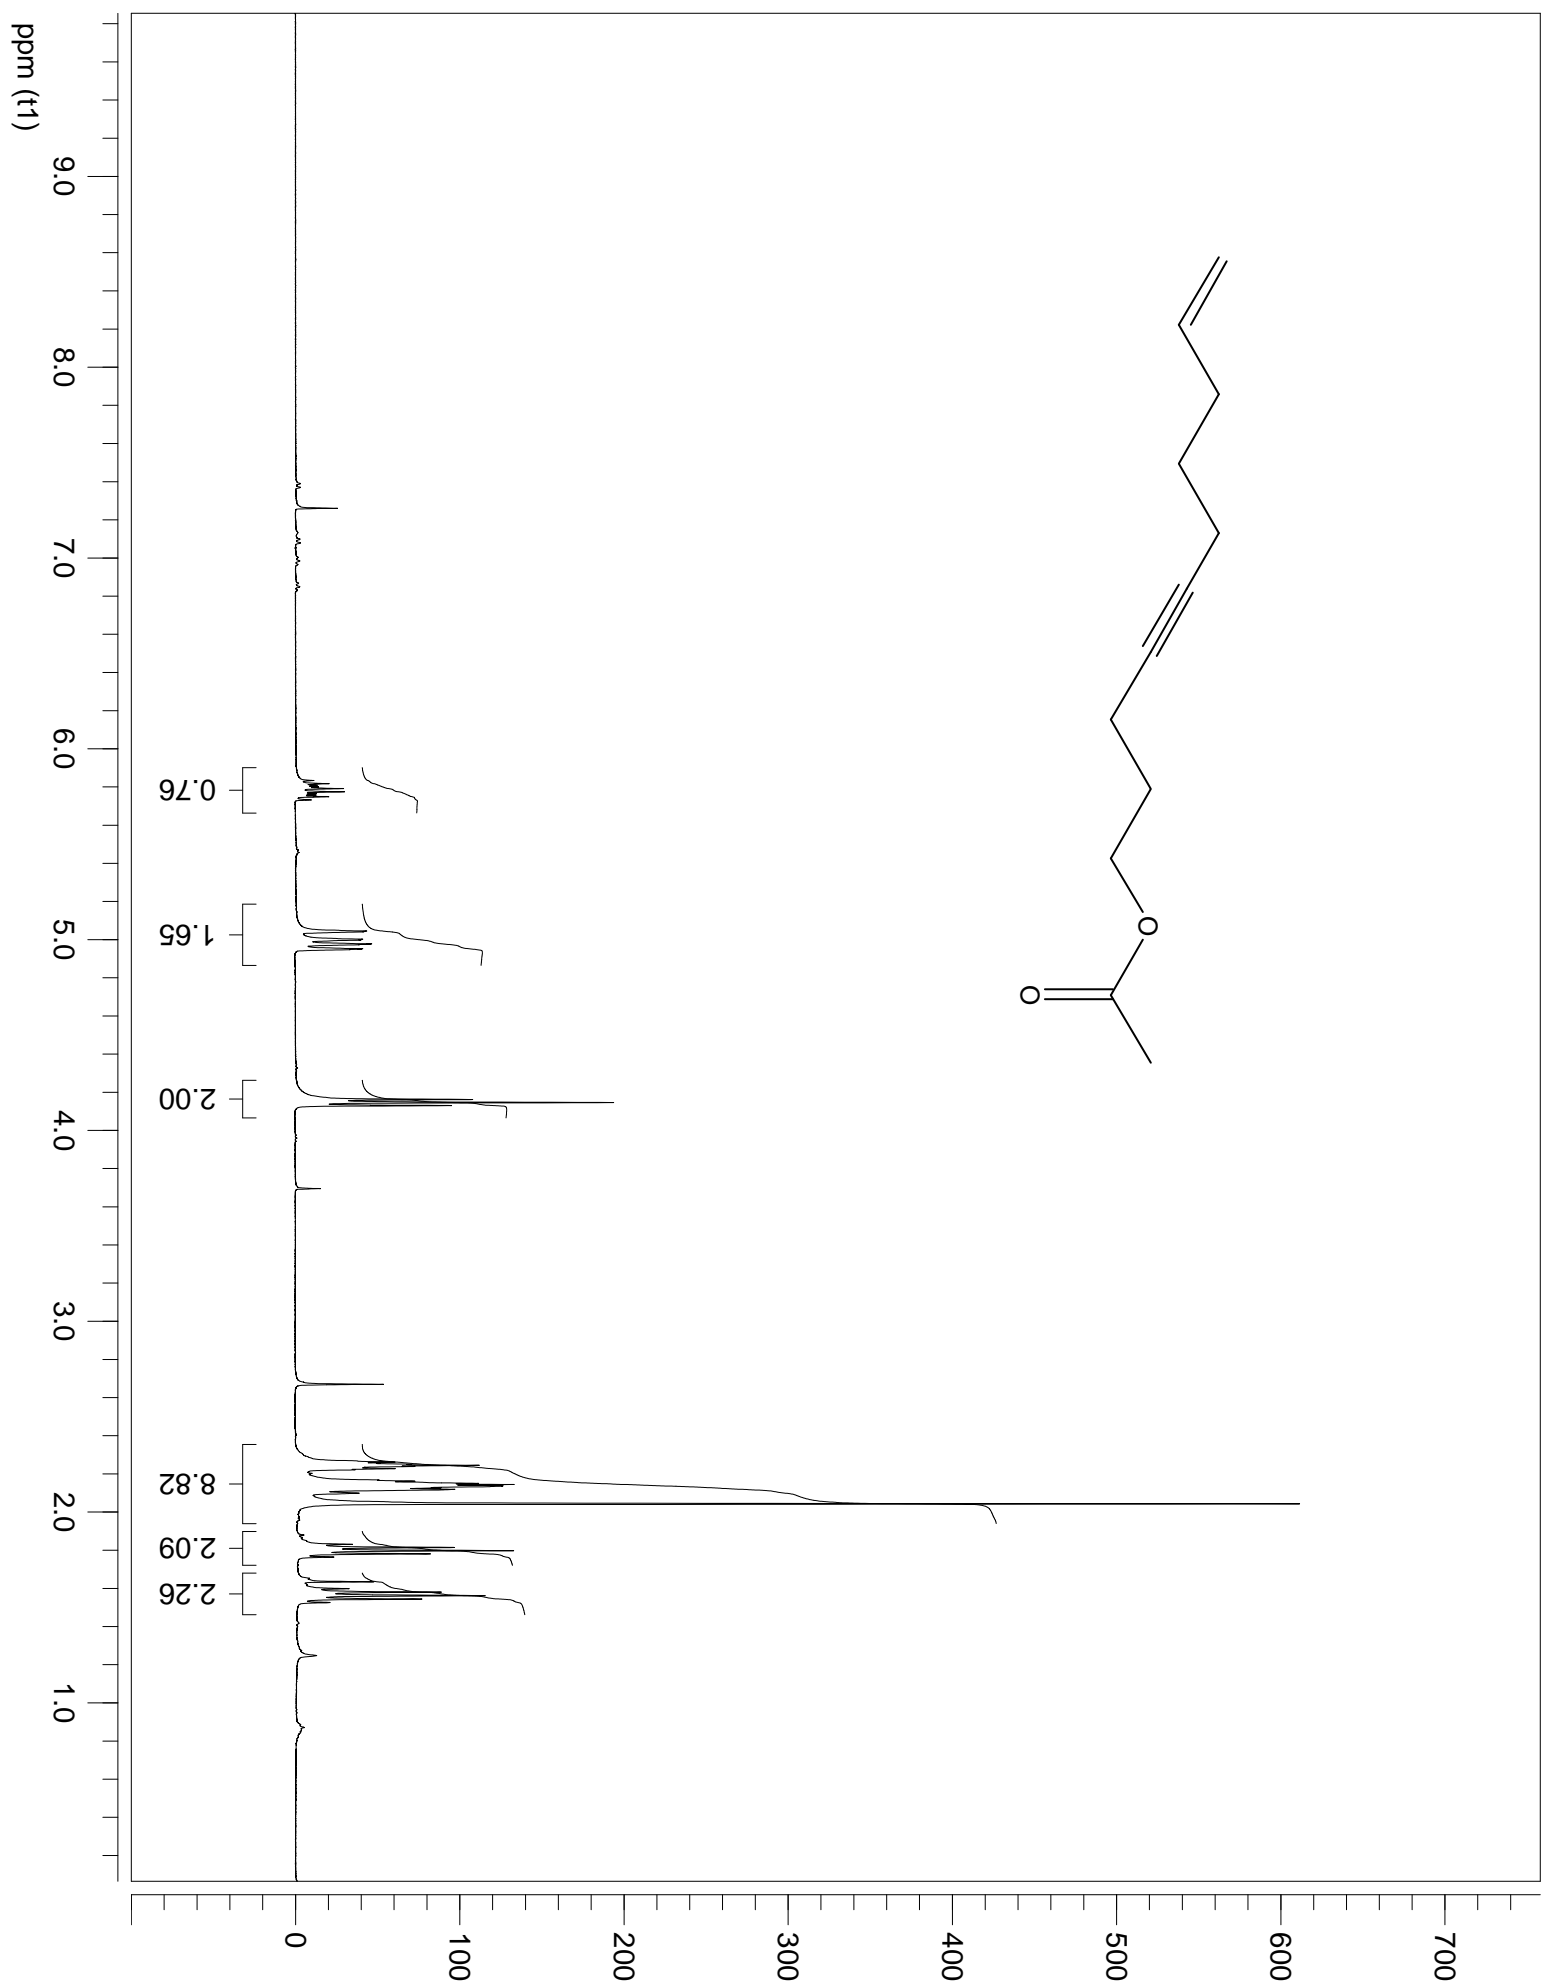



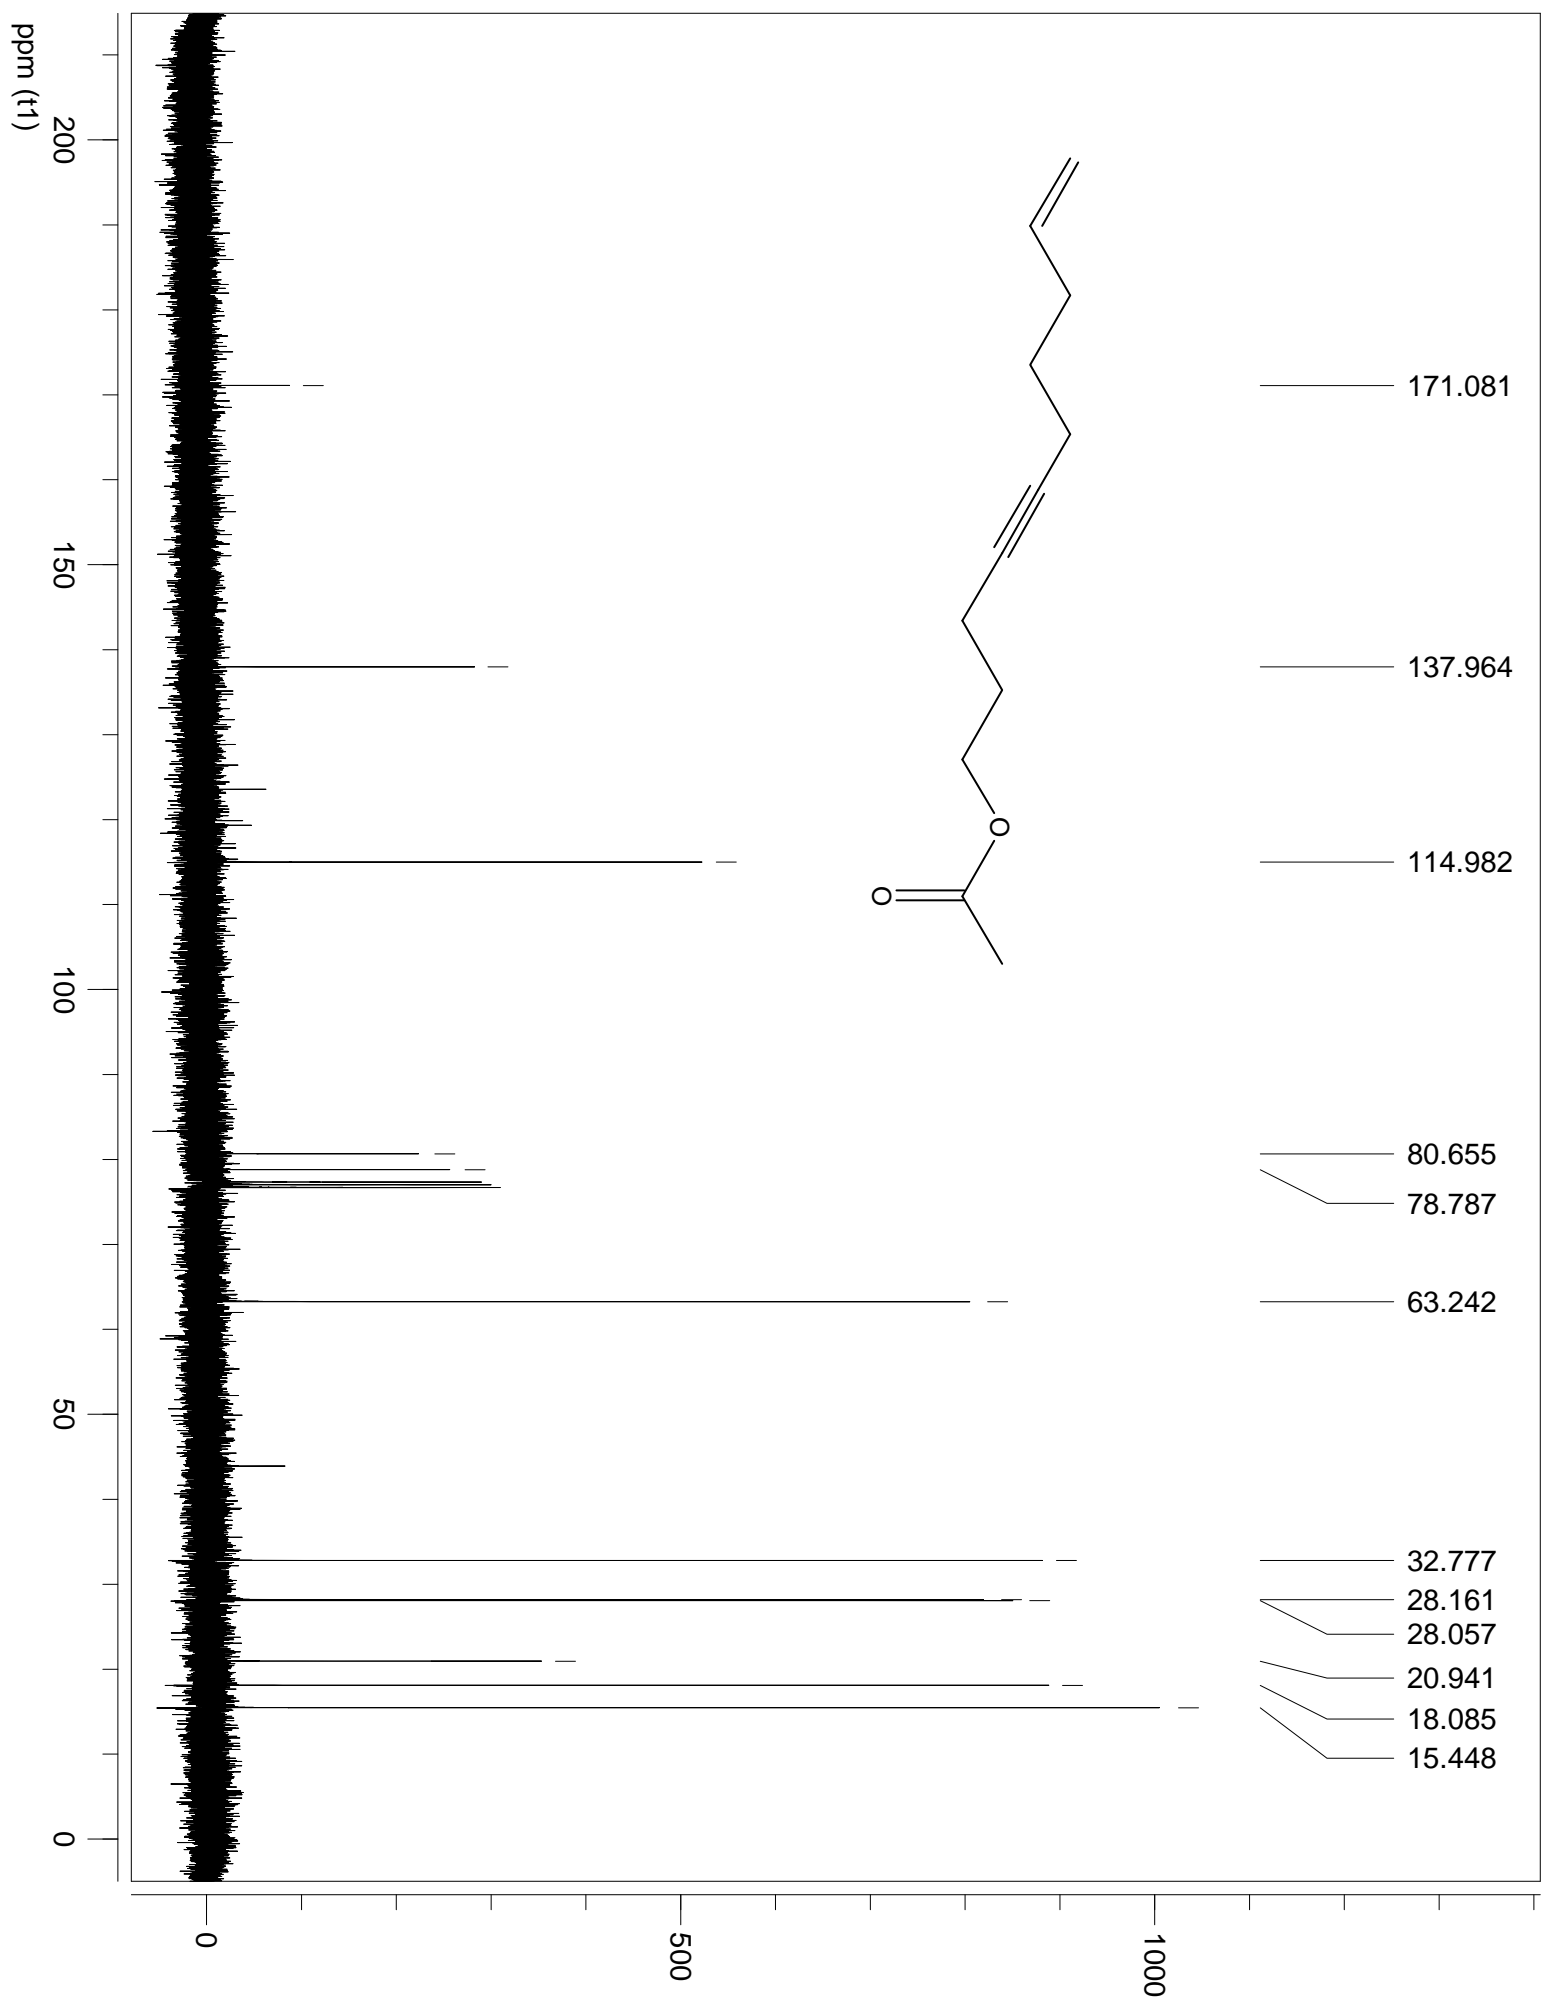

S53

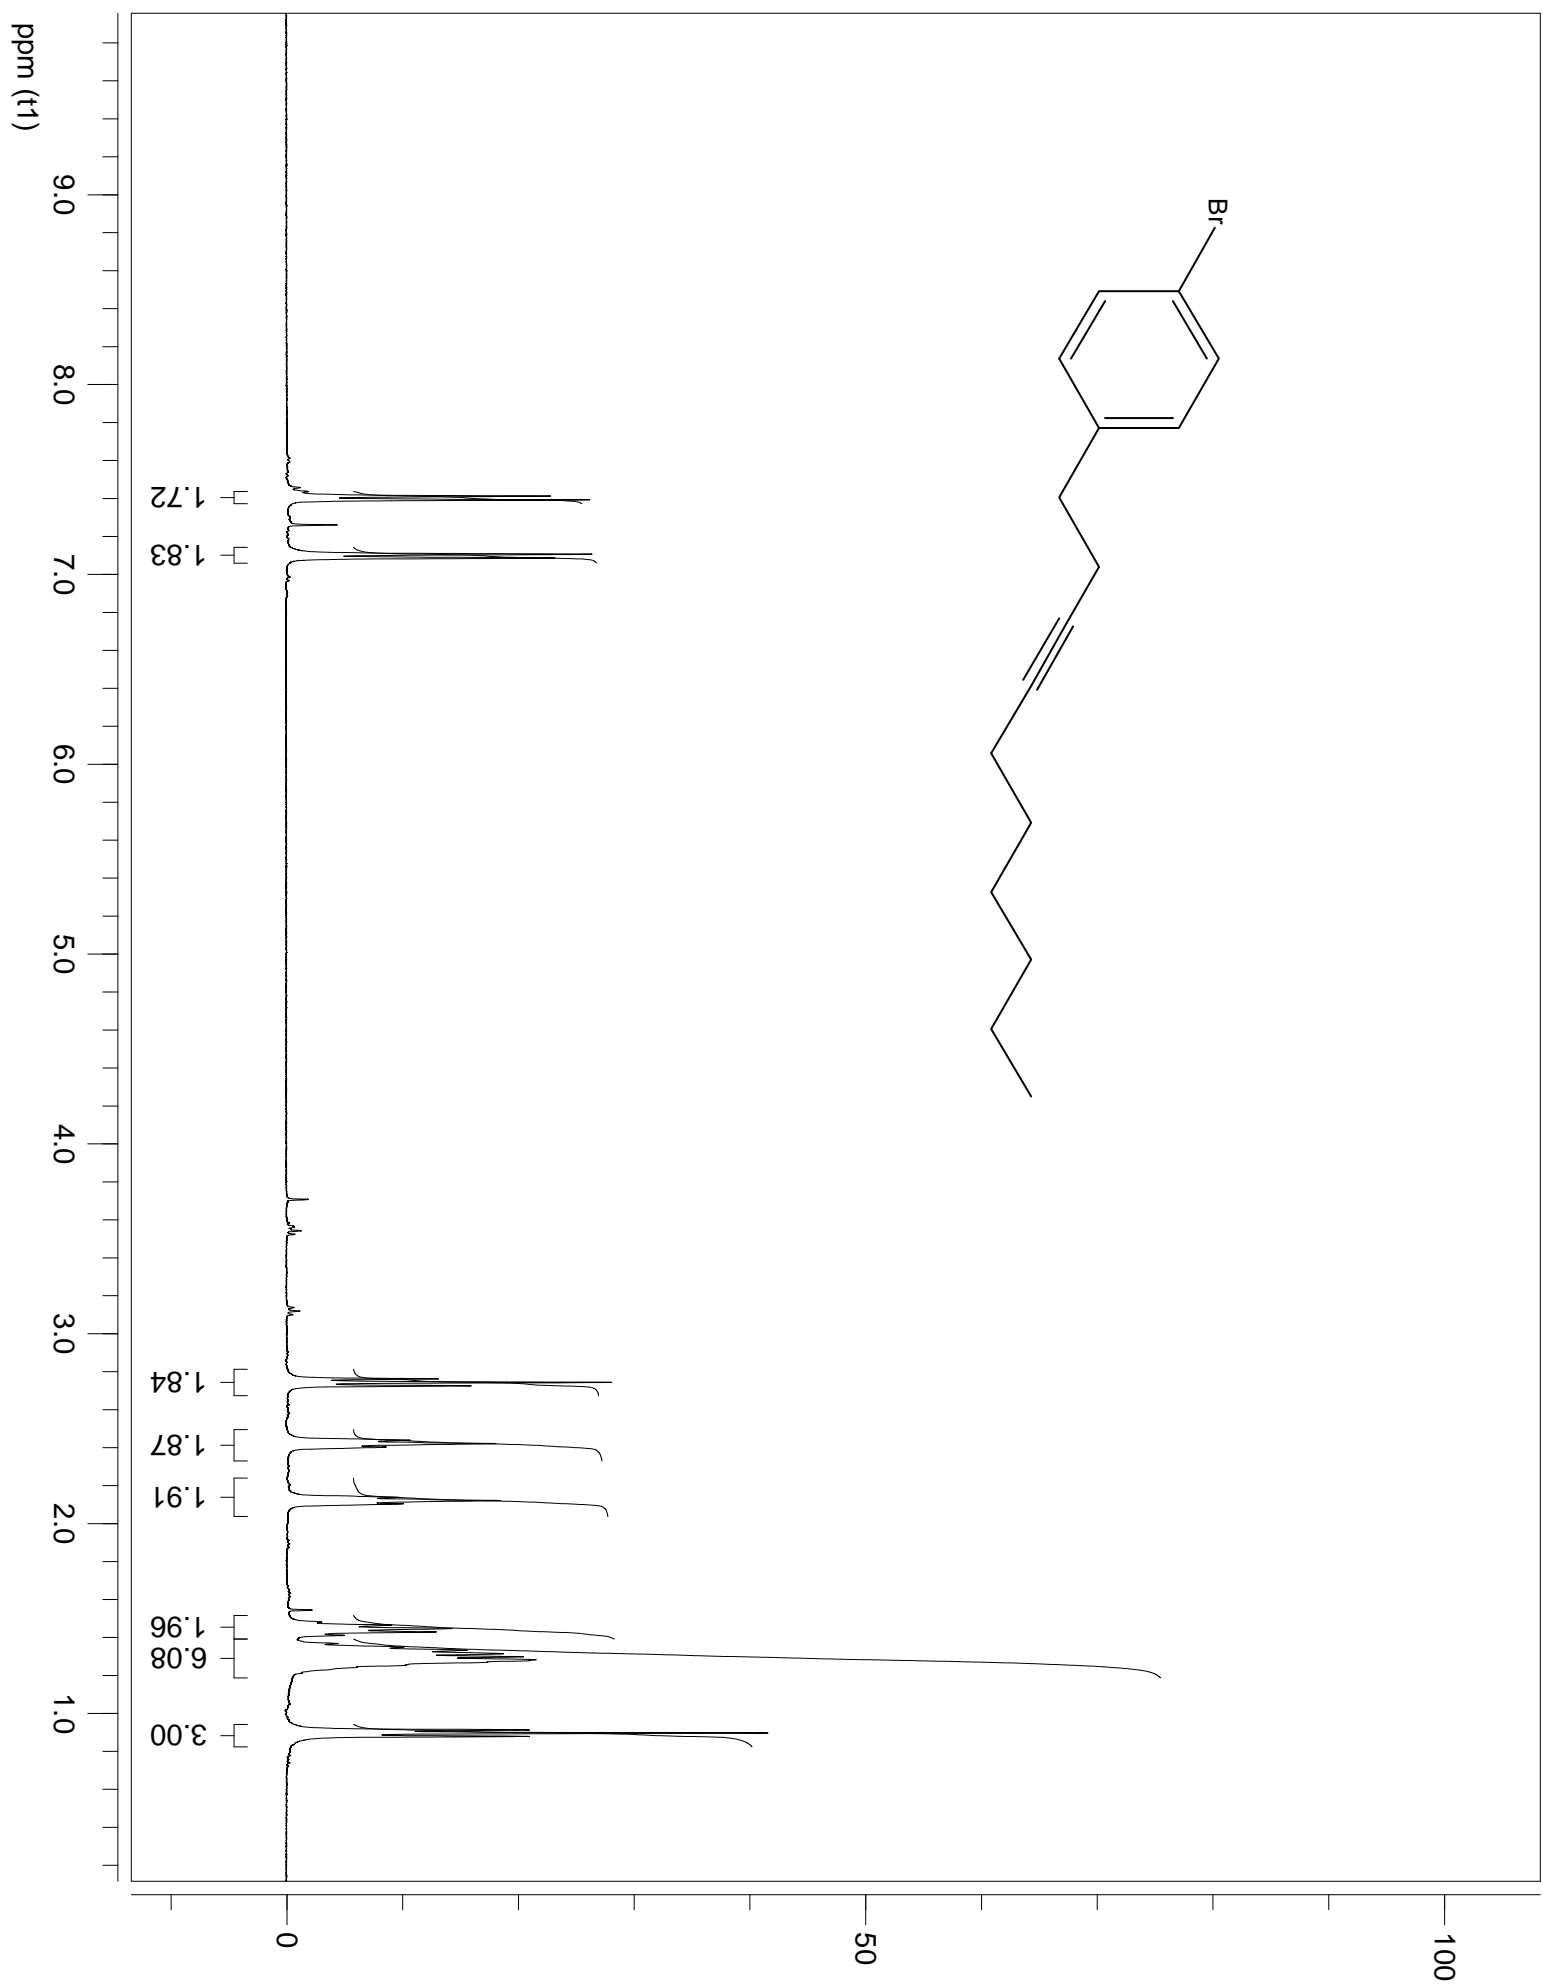

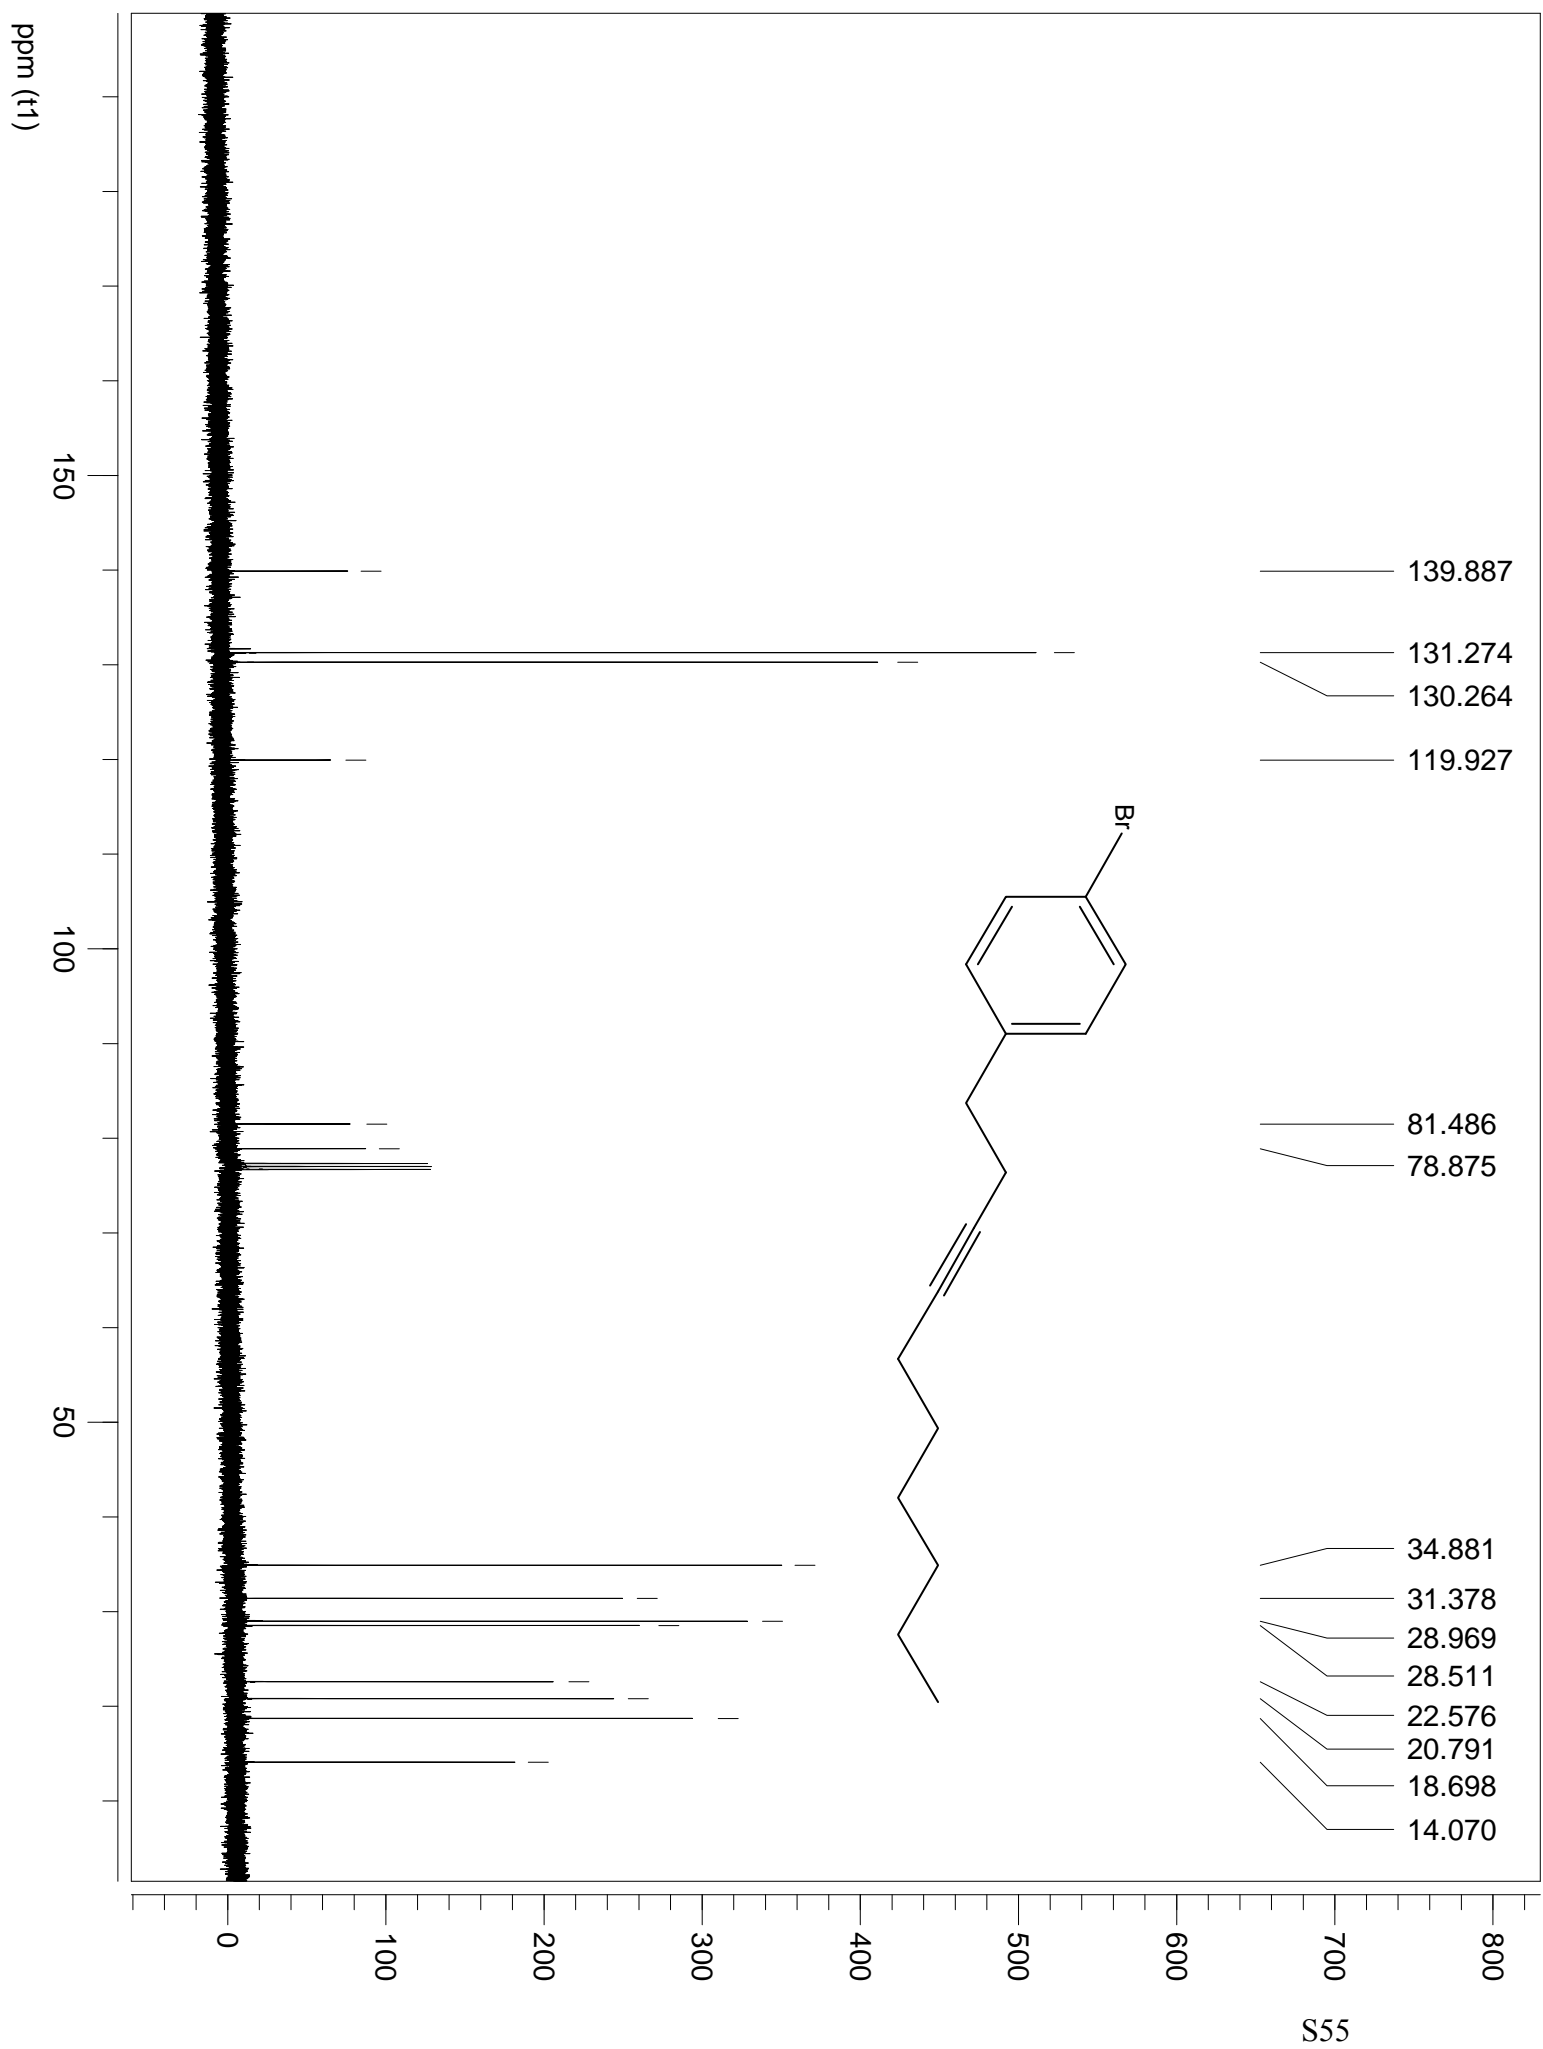

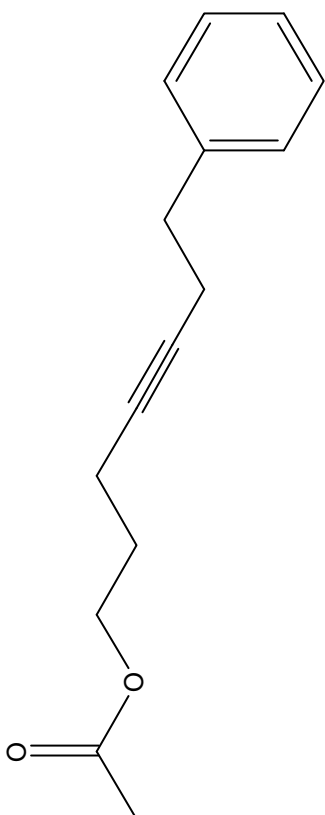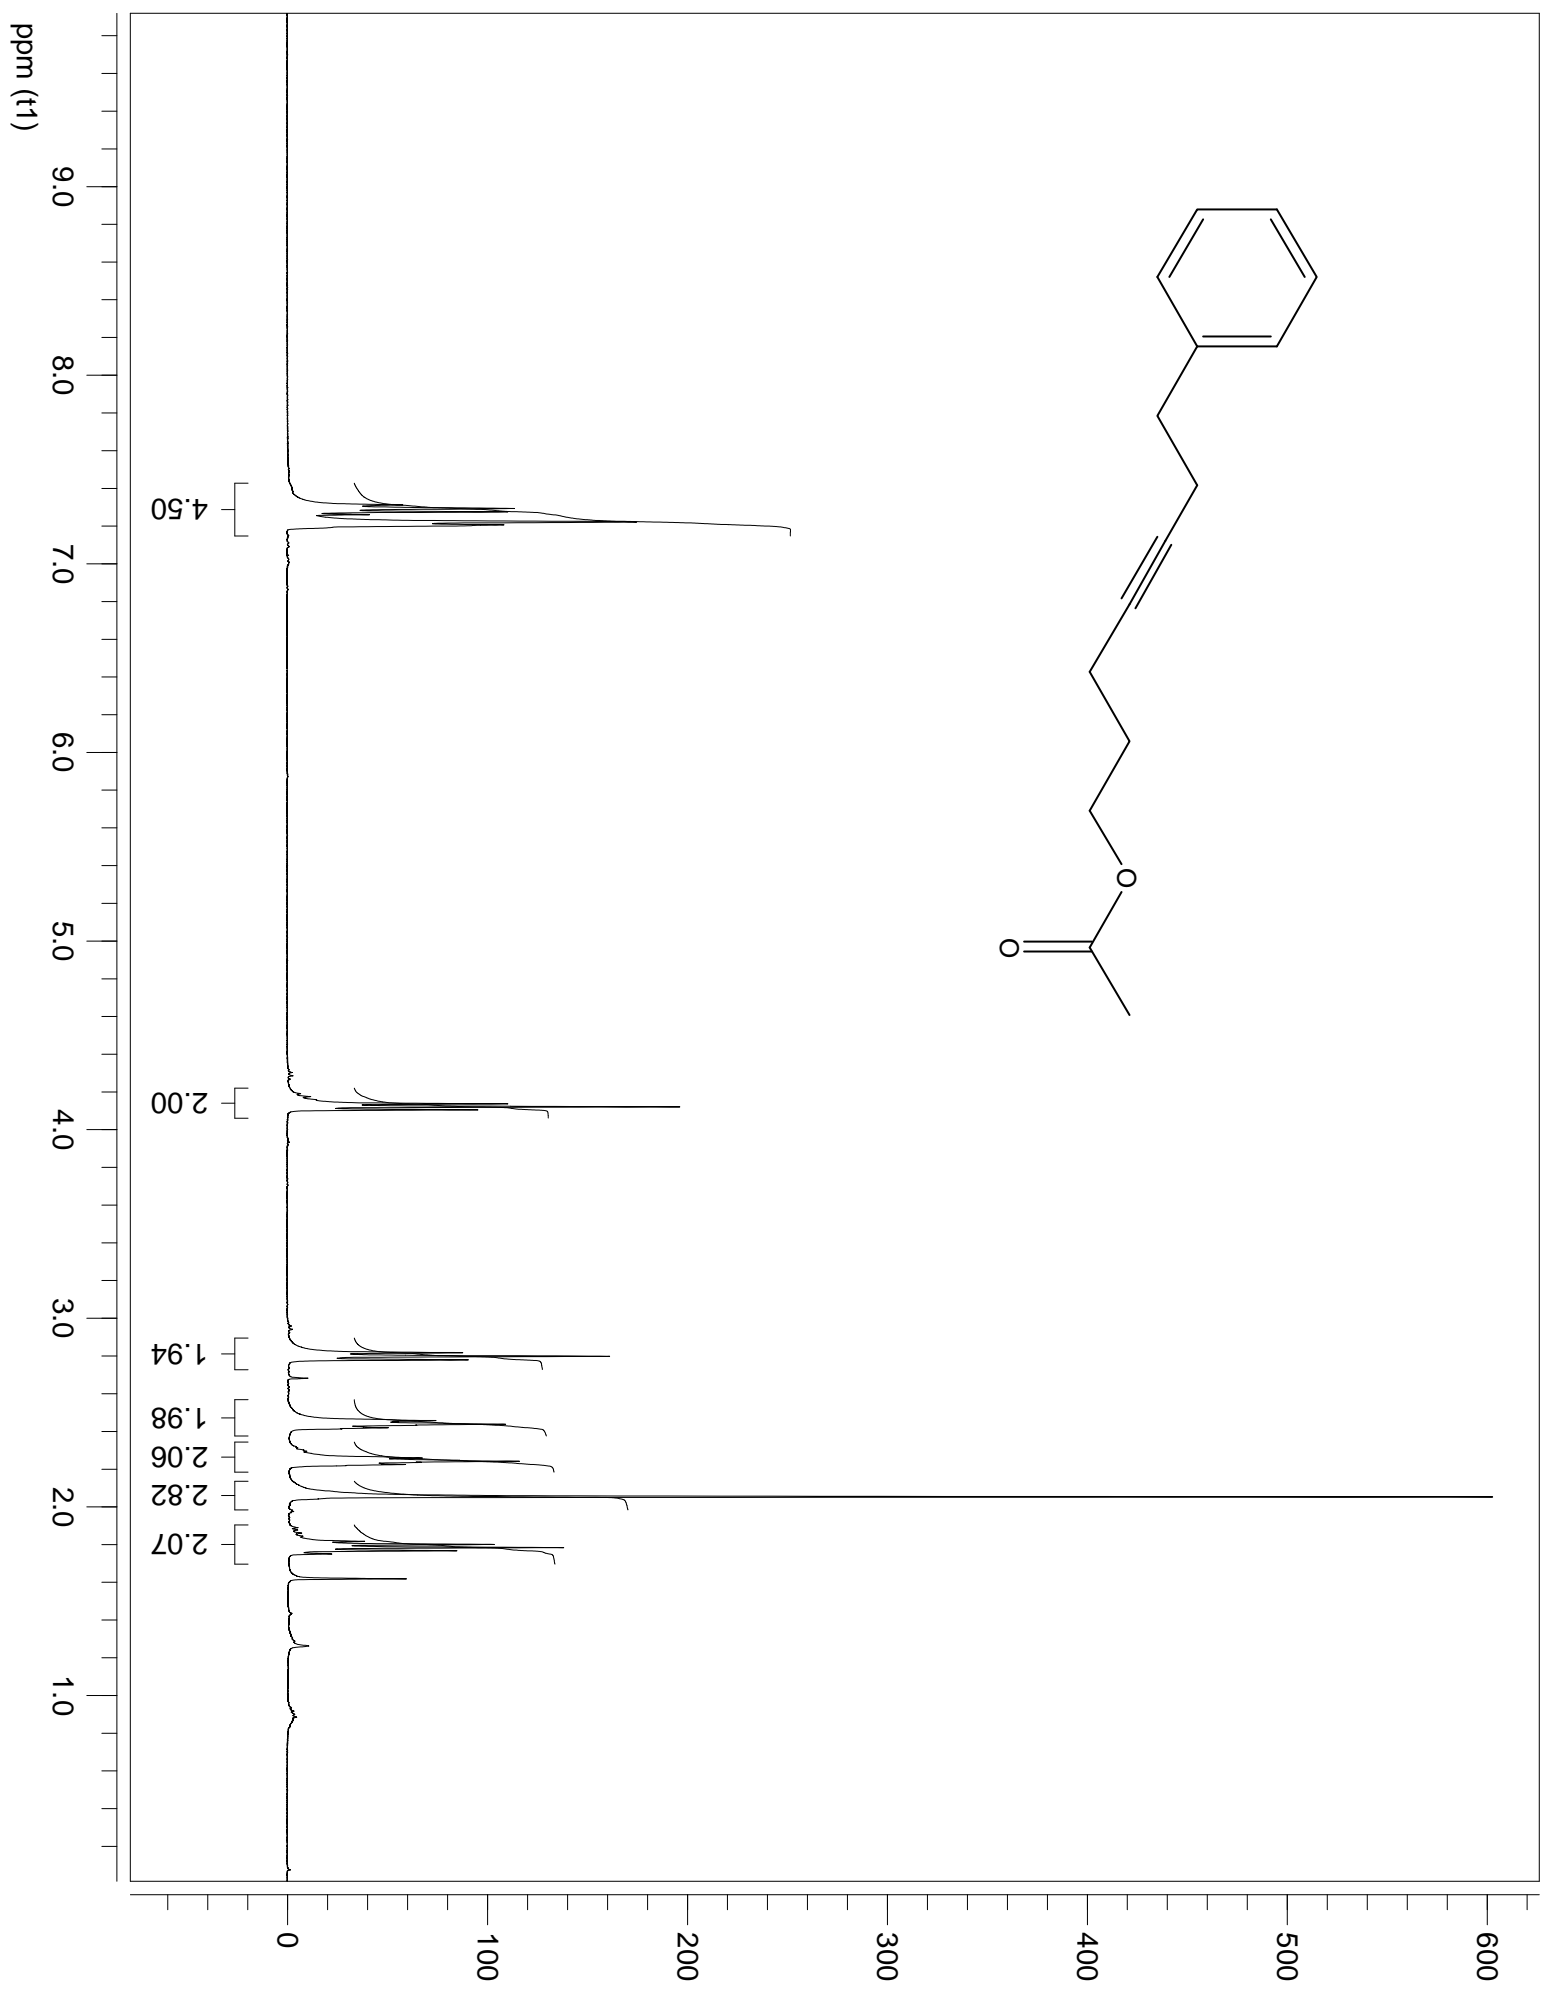

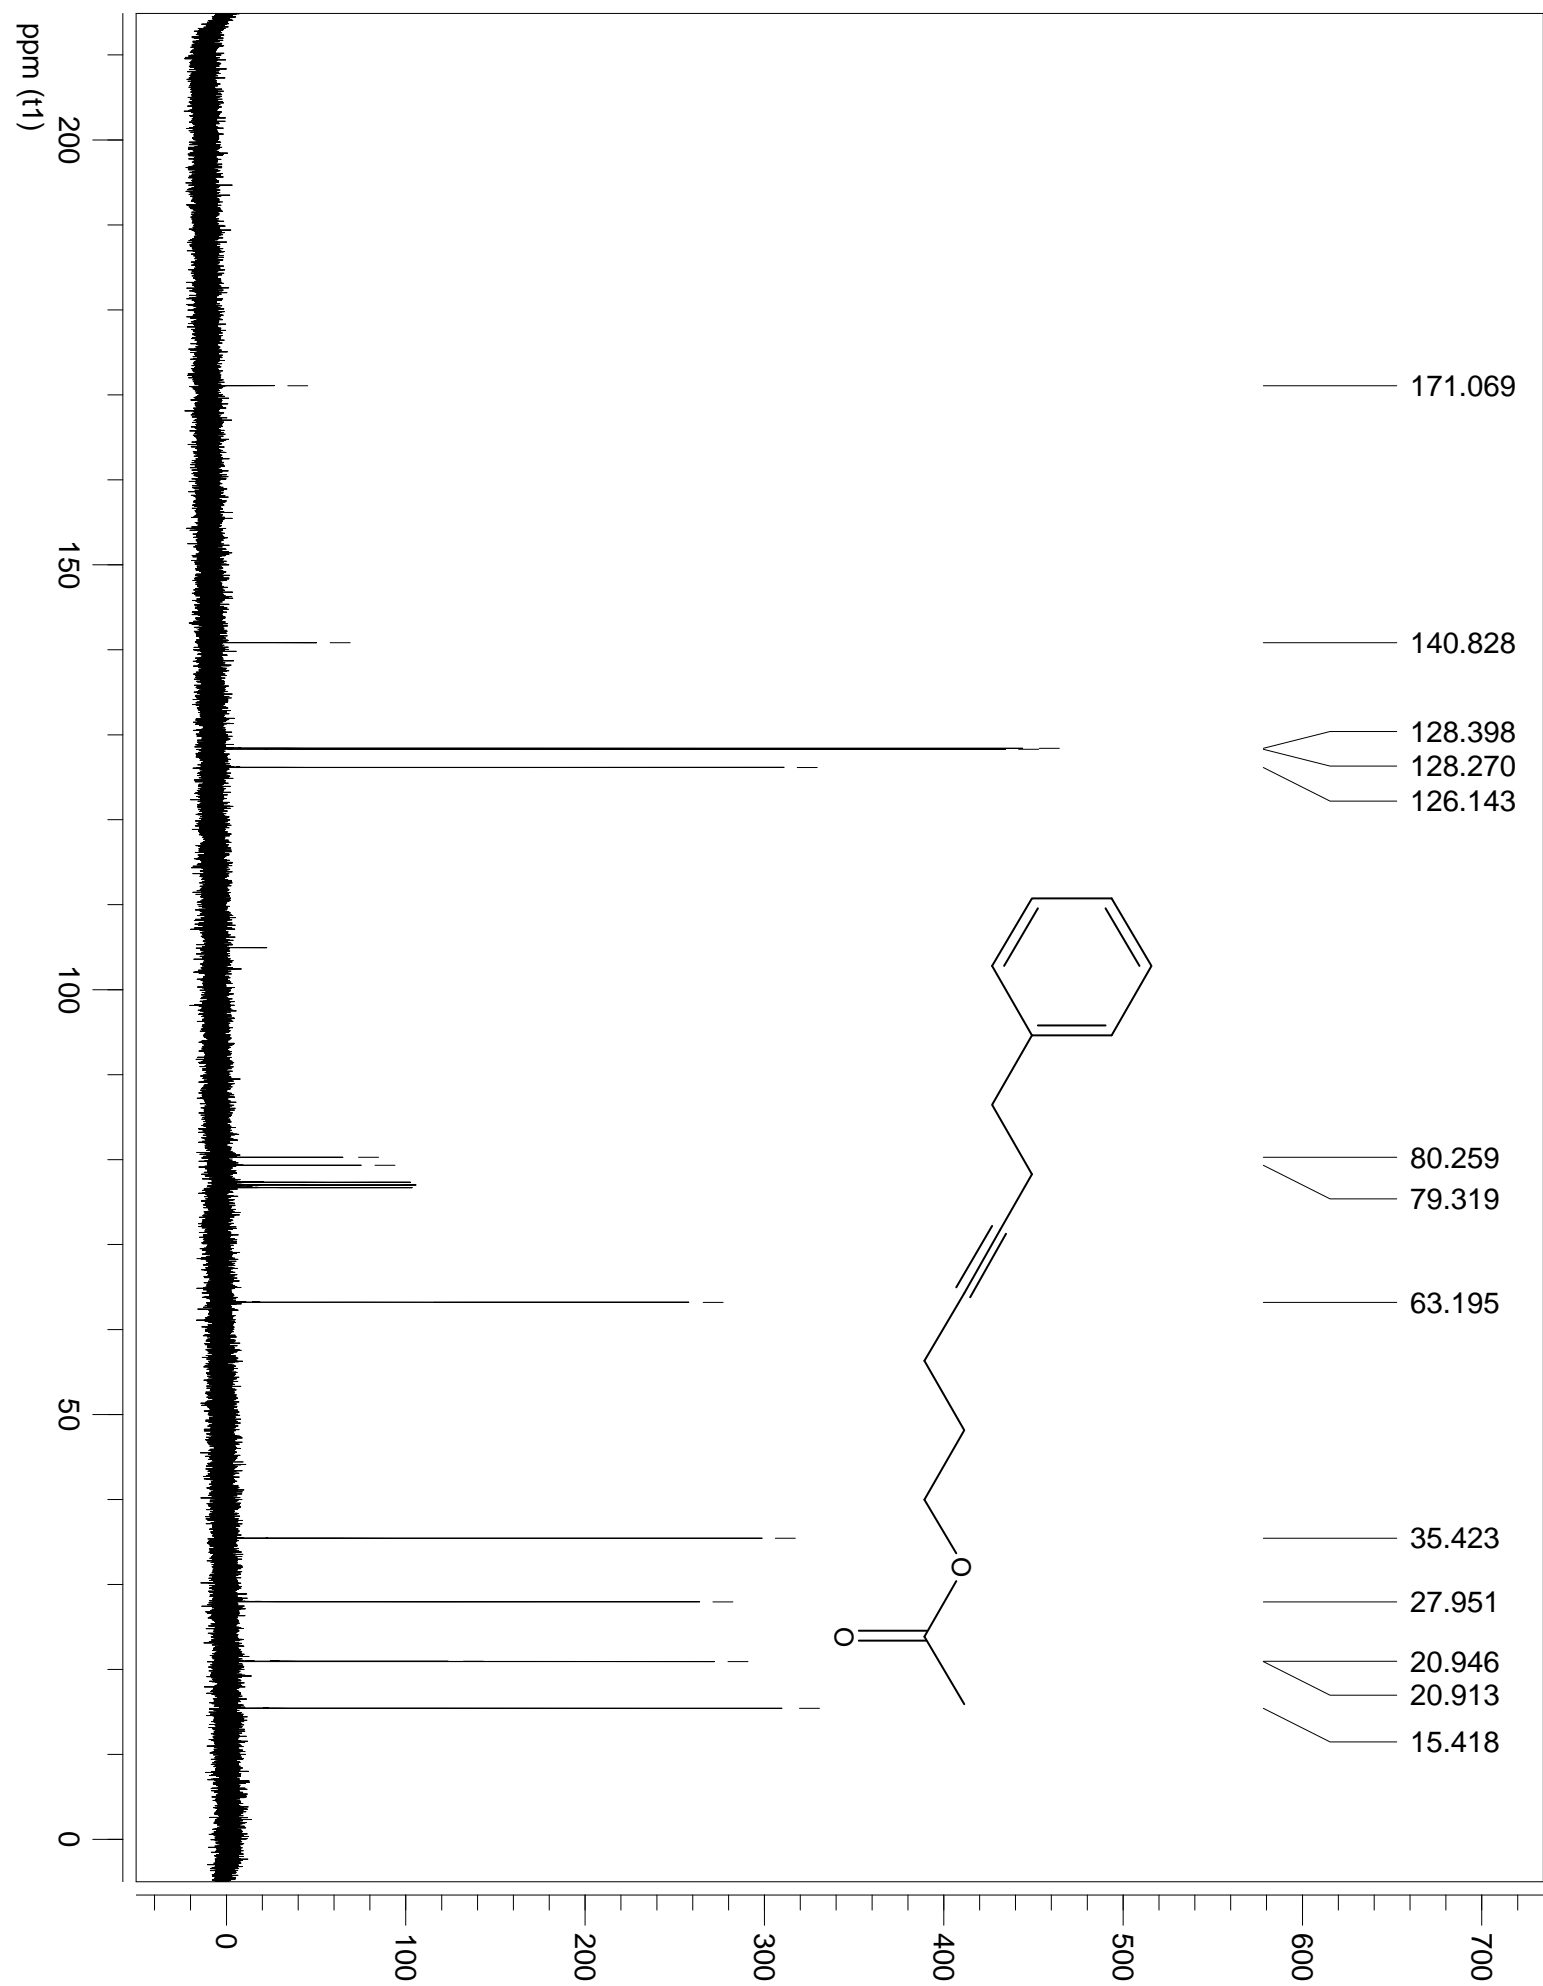

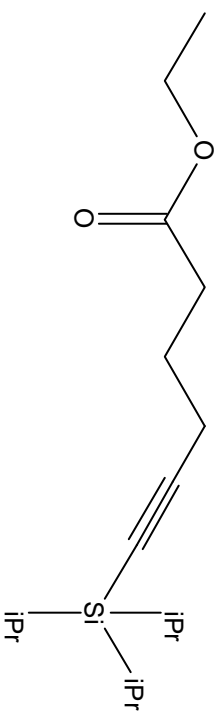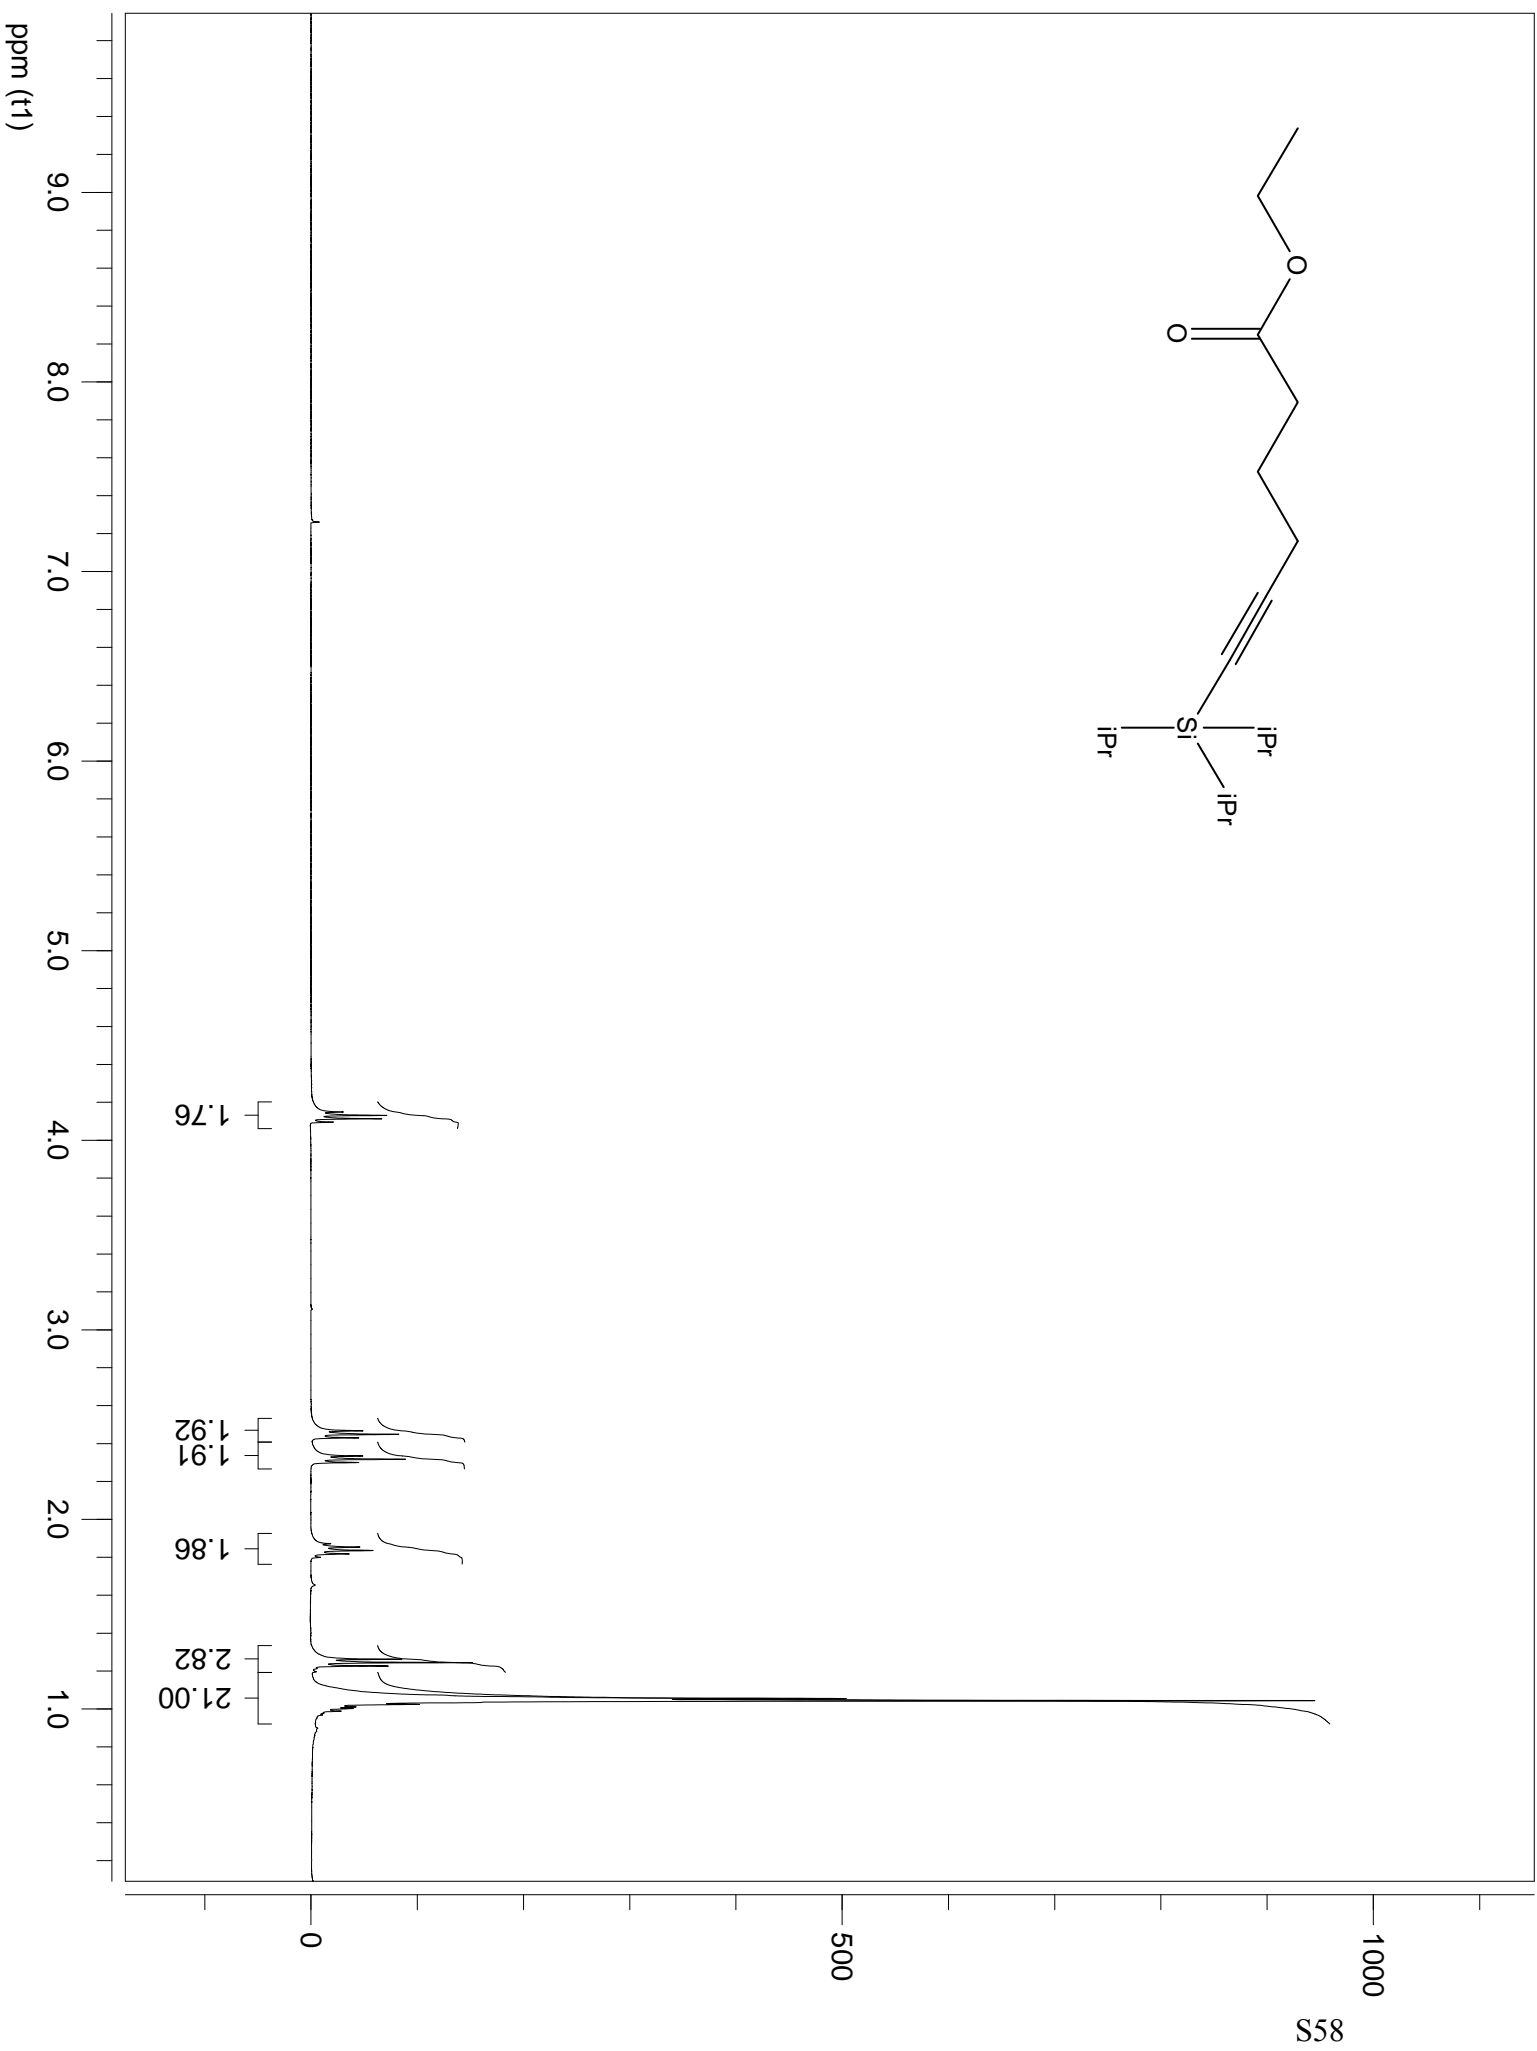

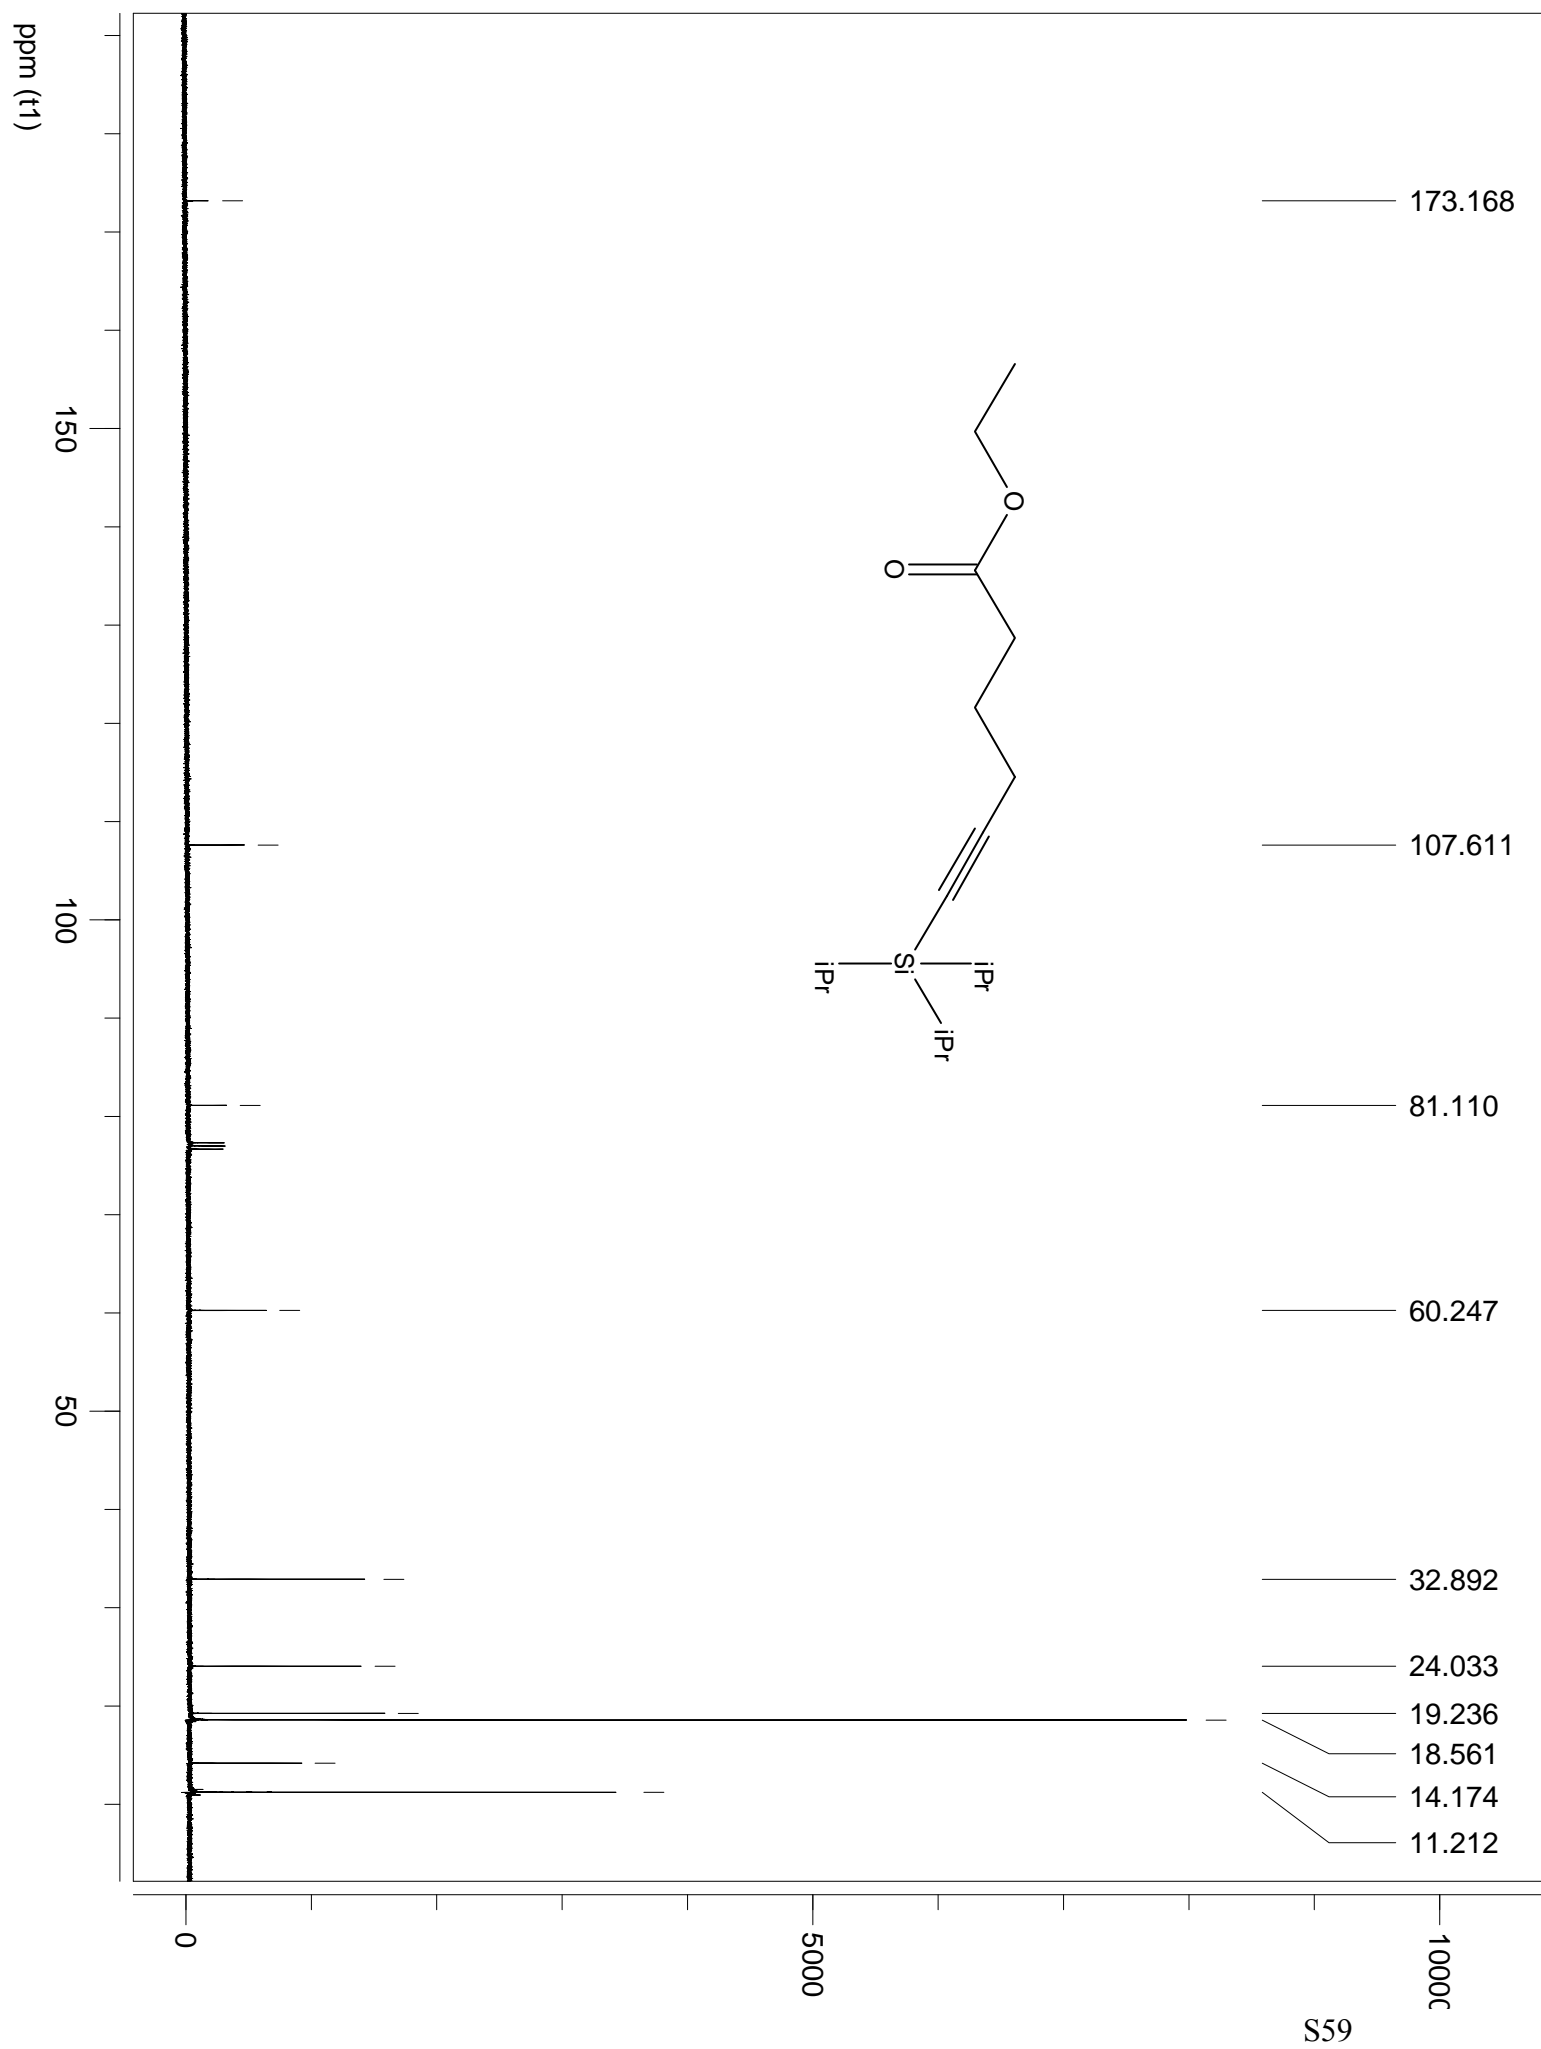

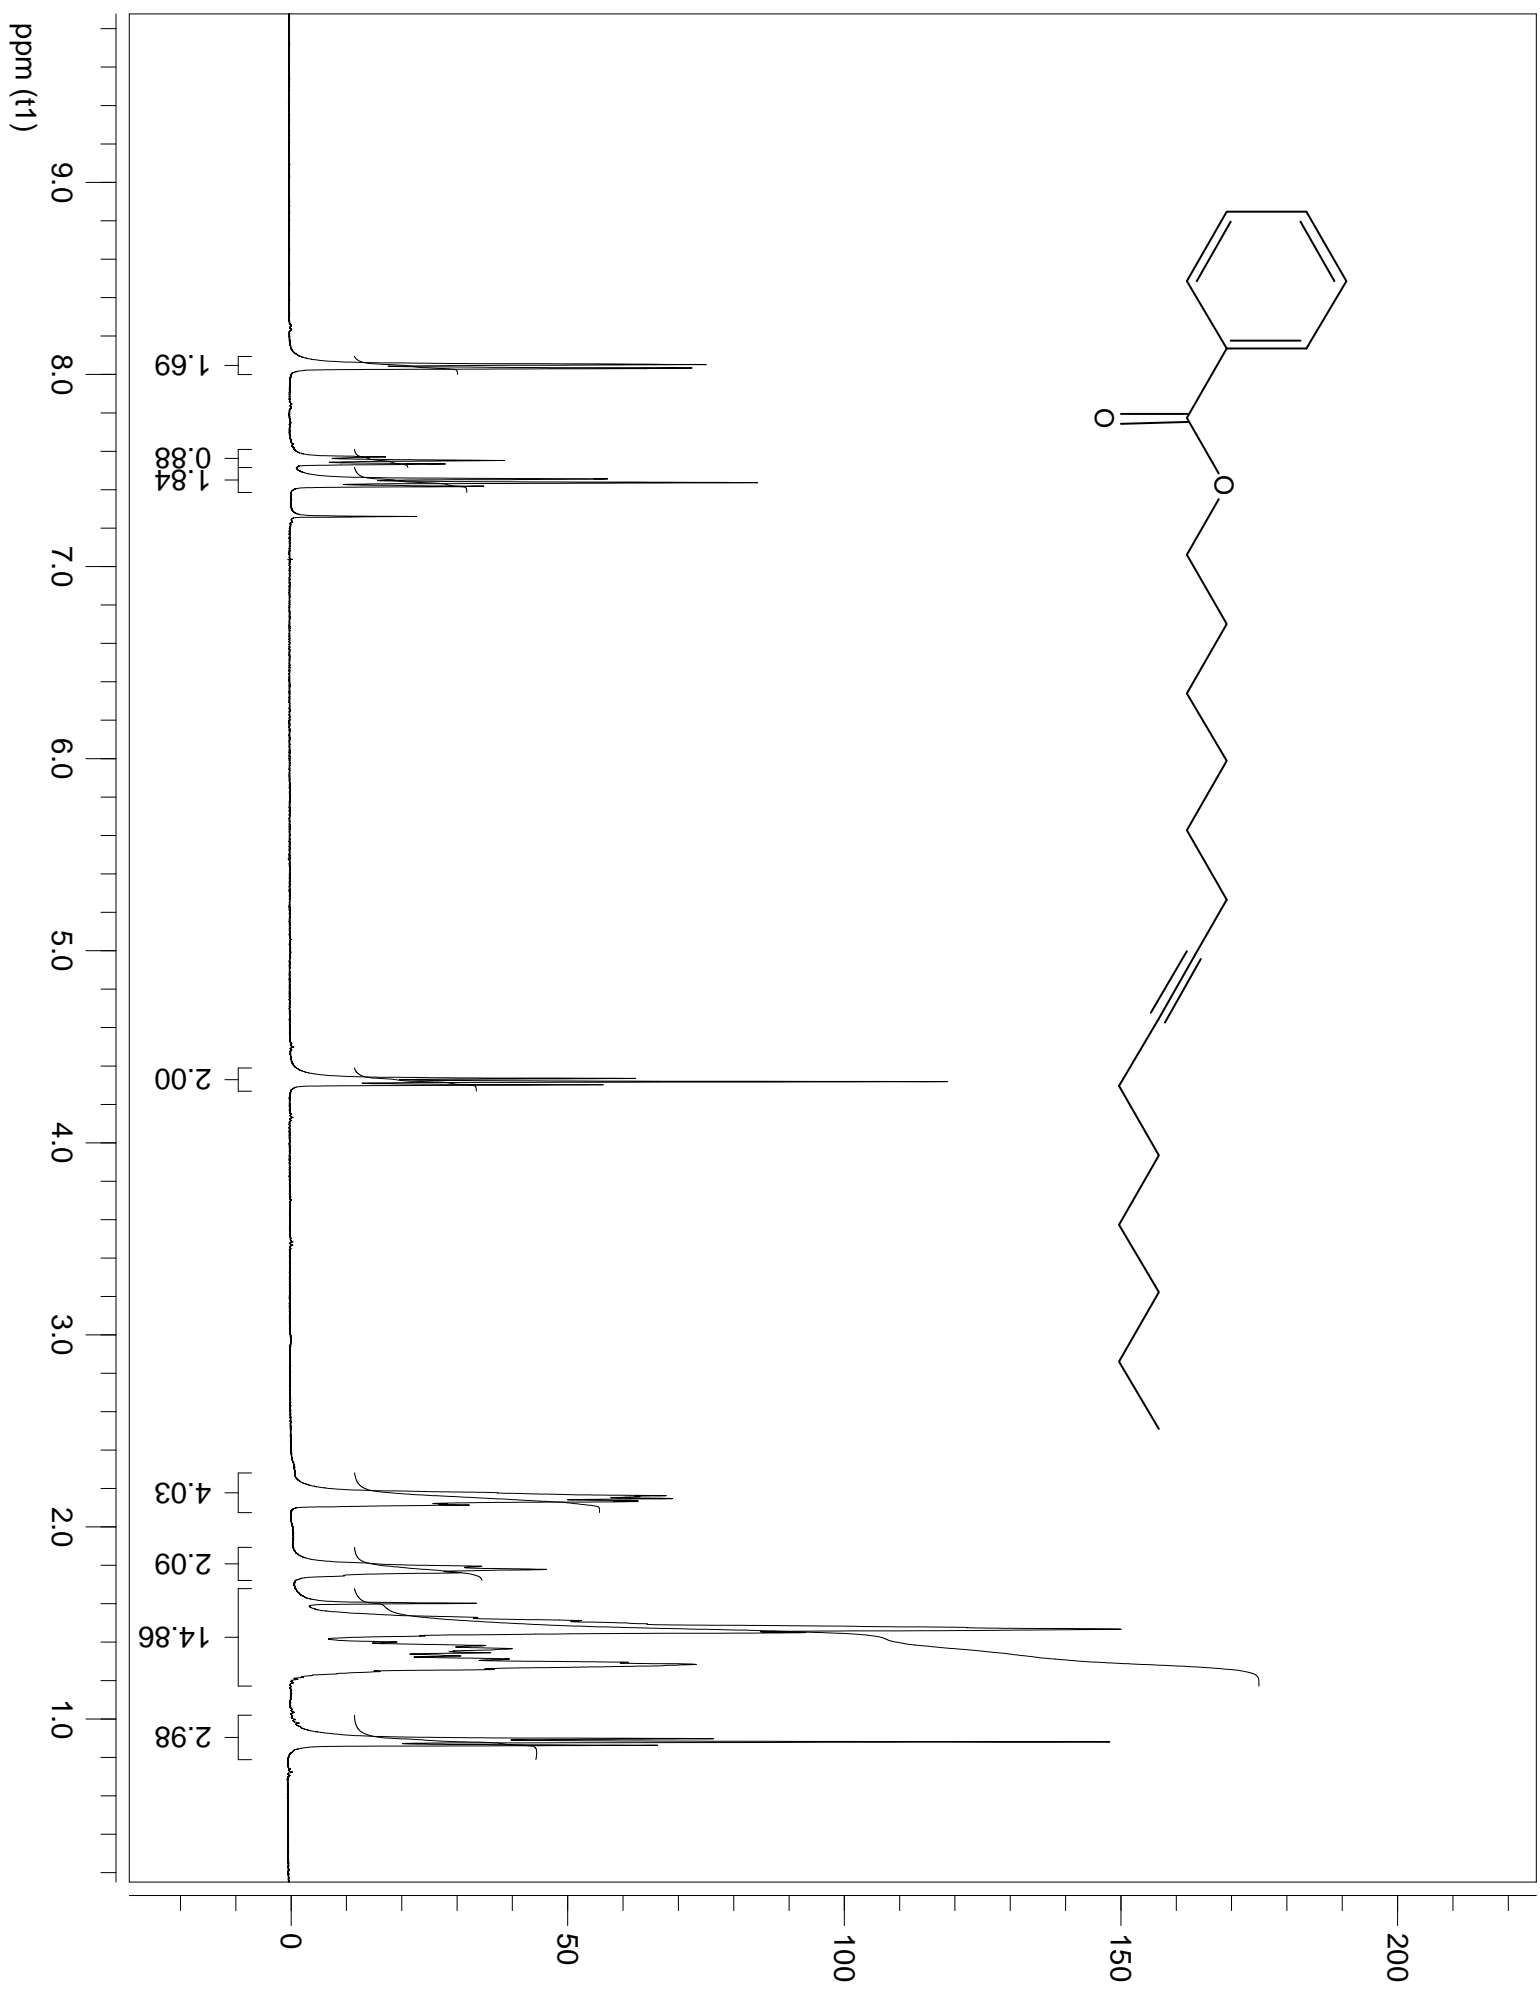



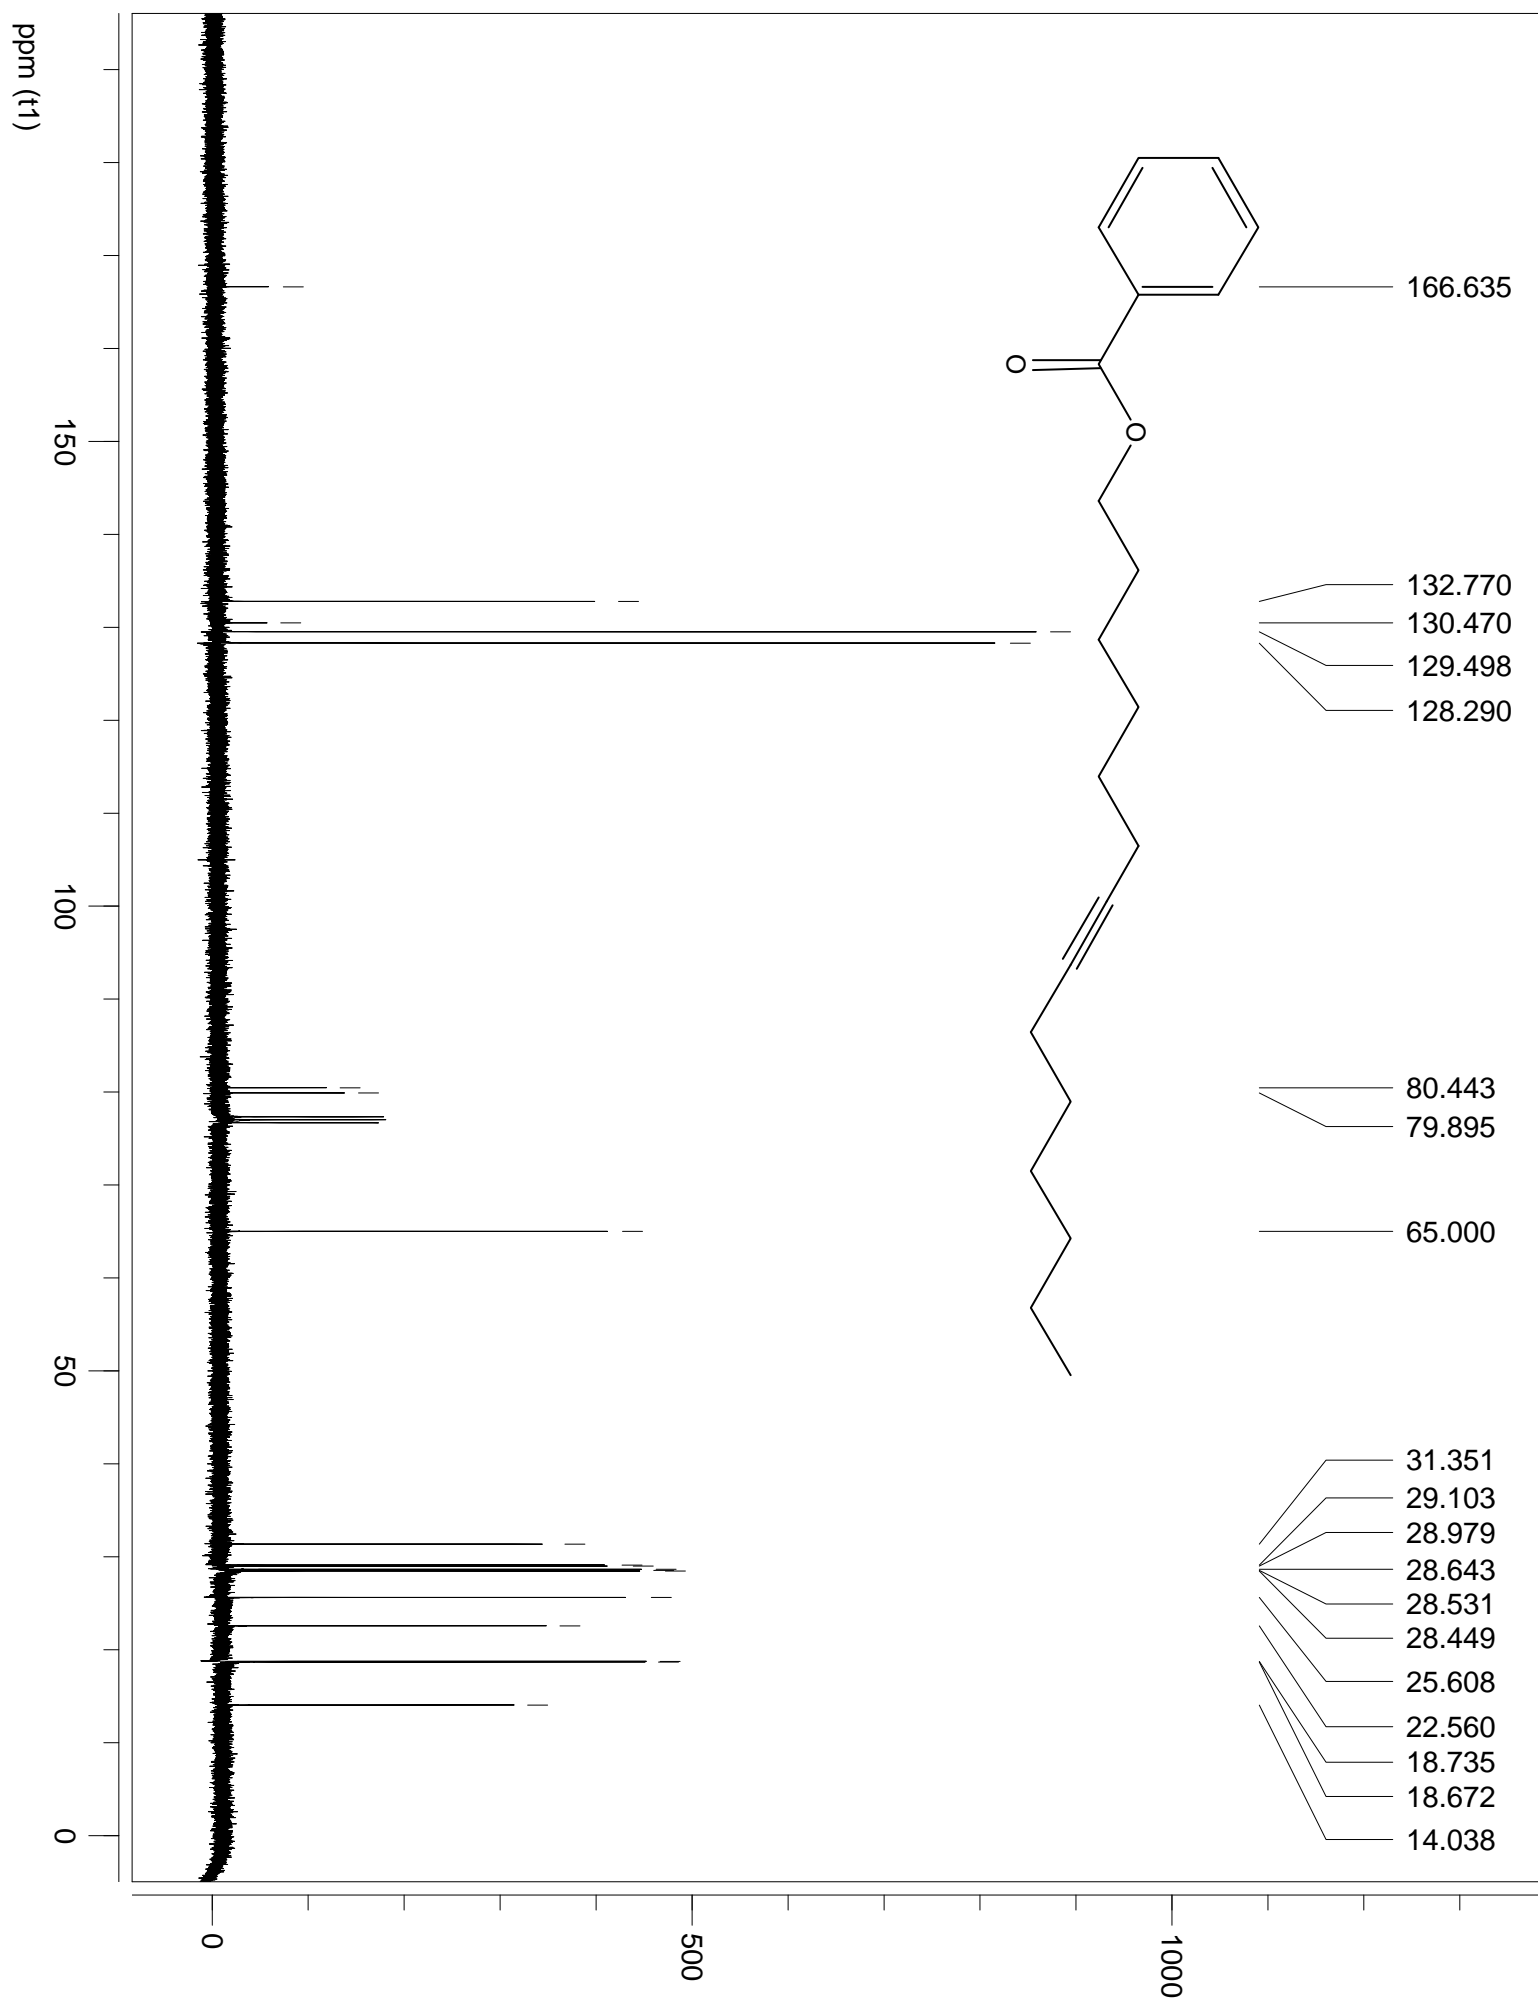

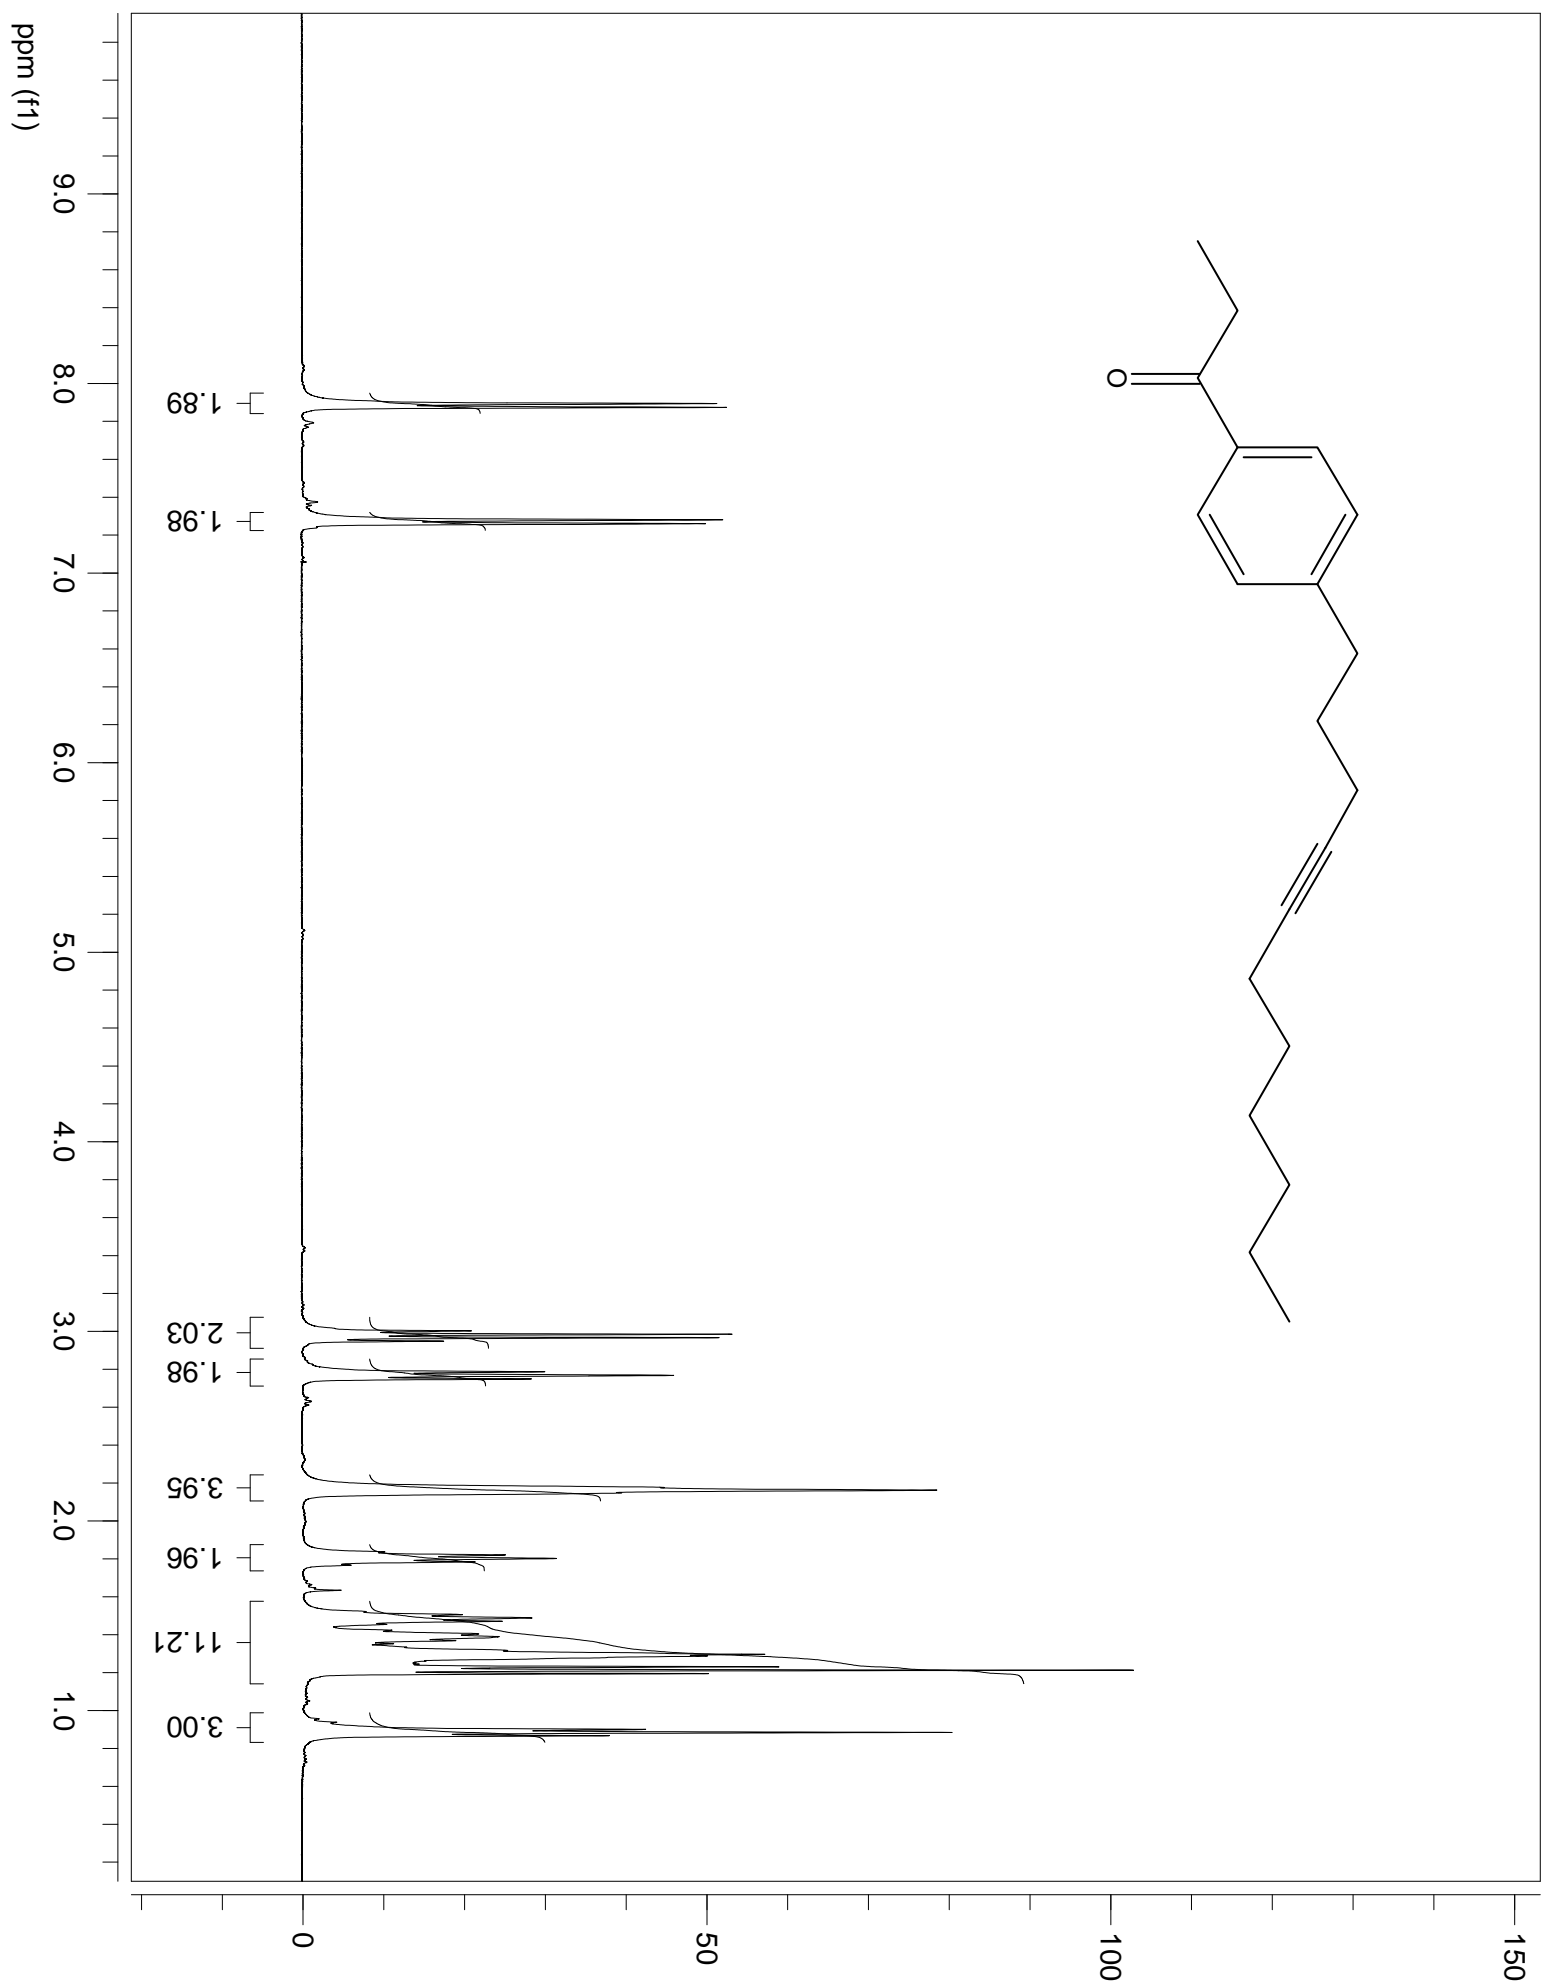

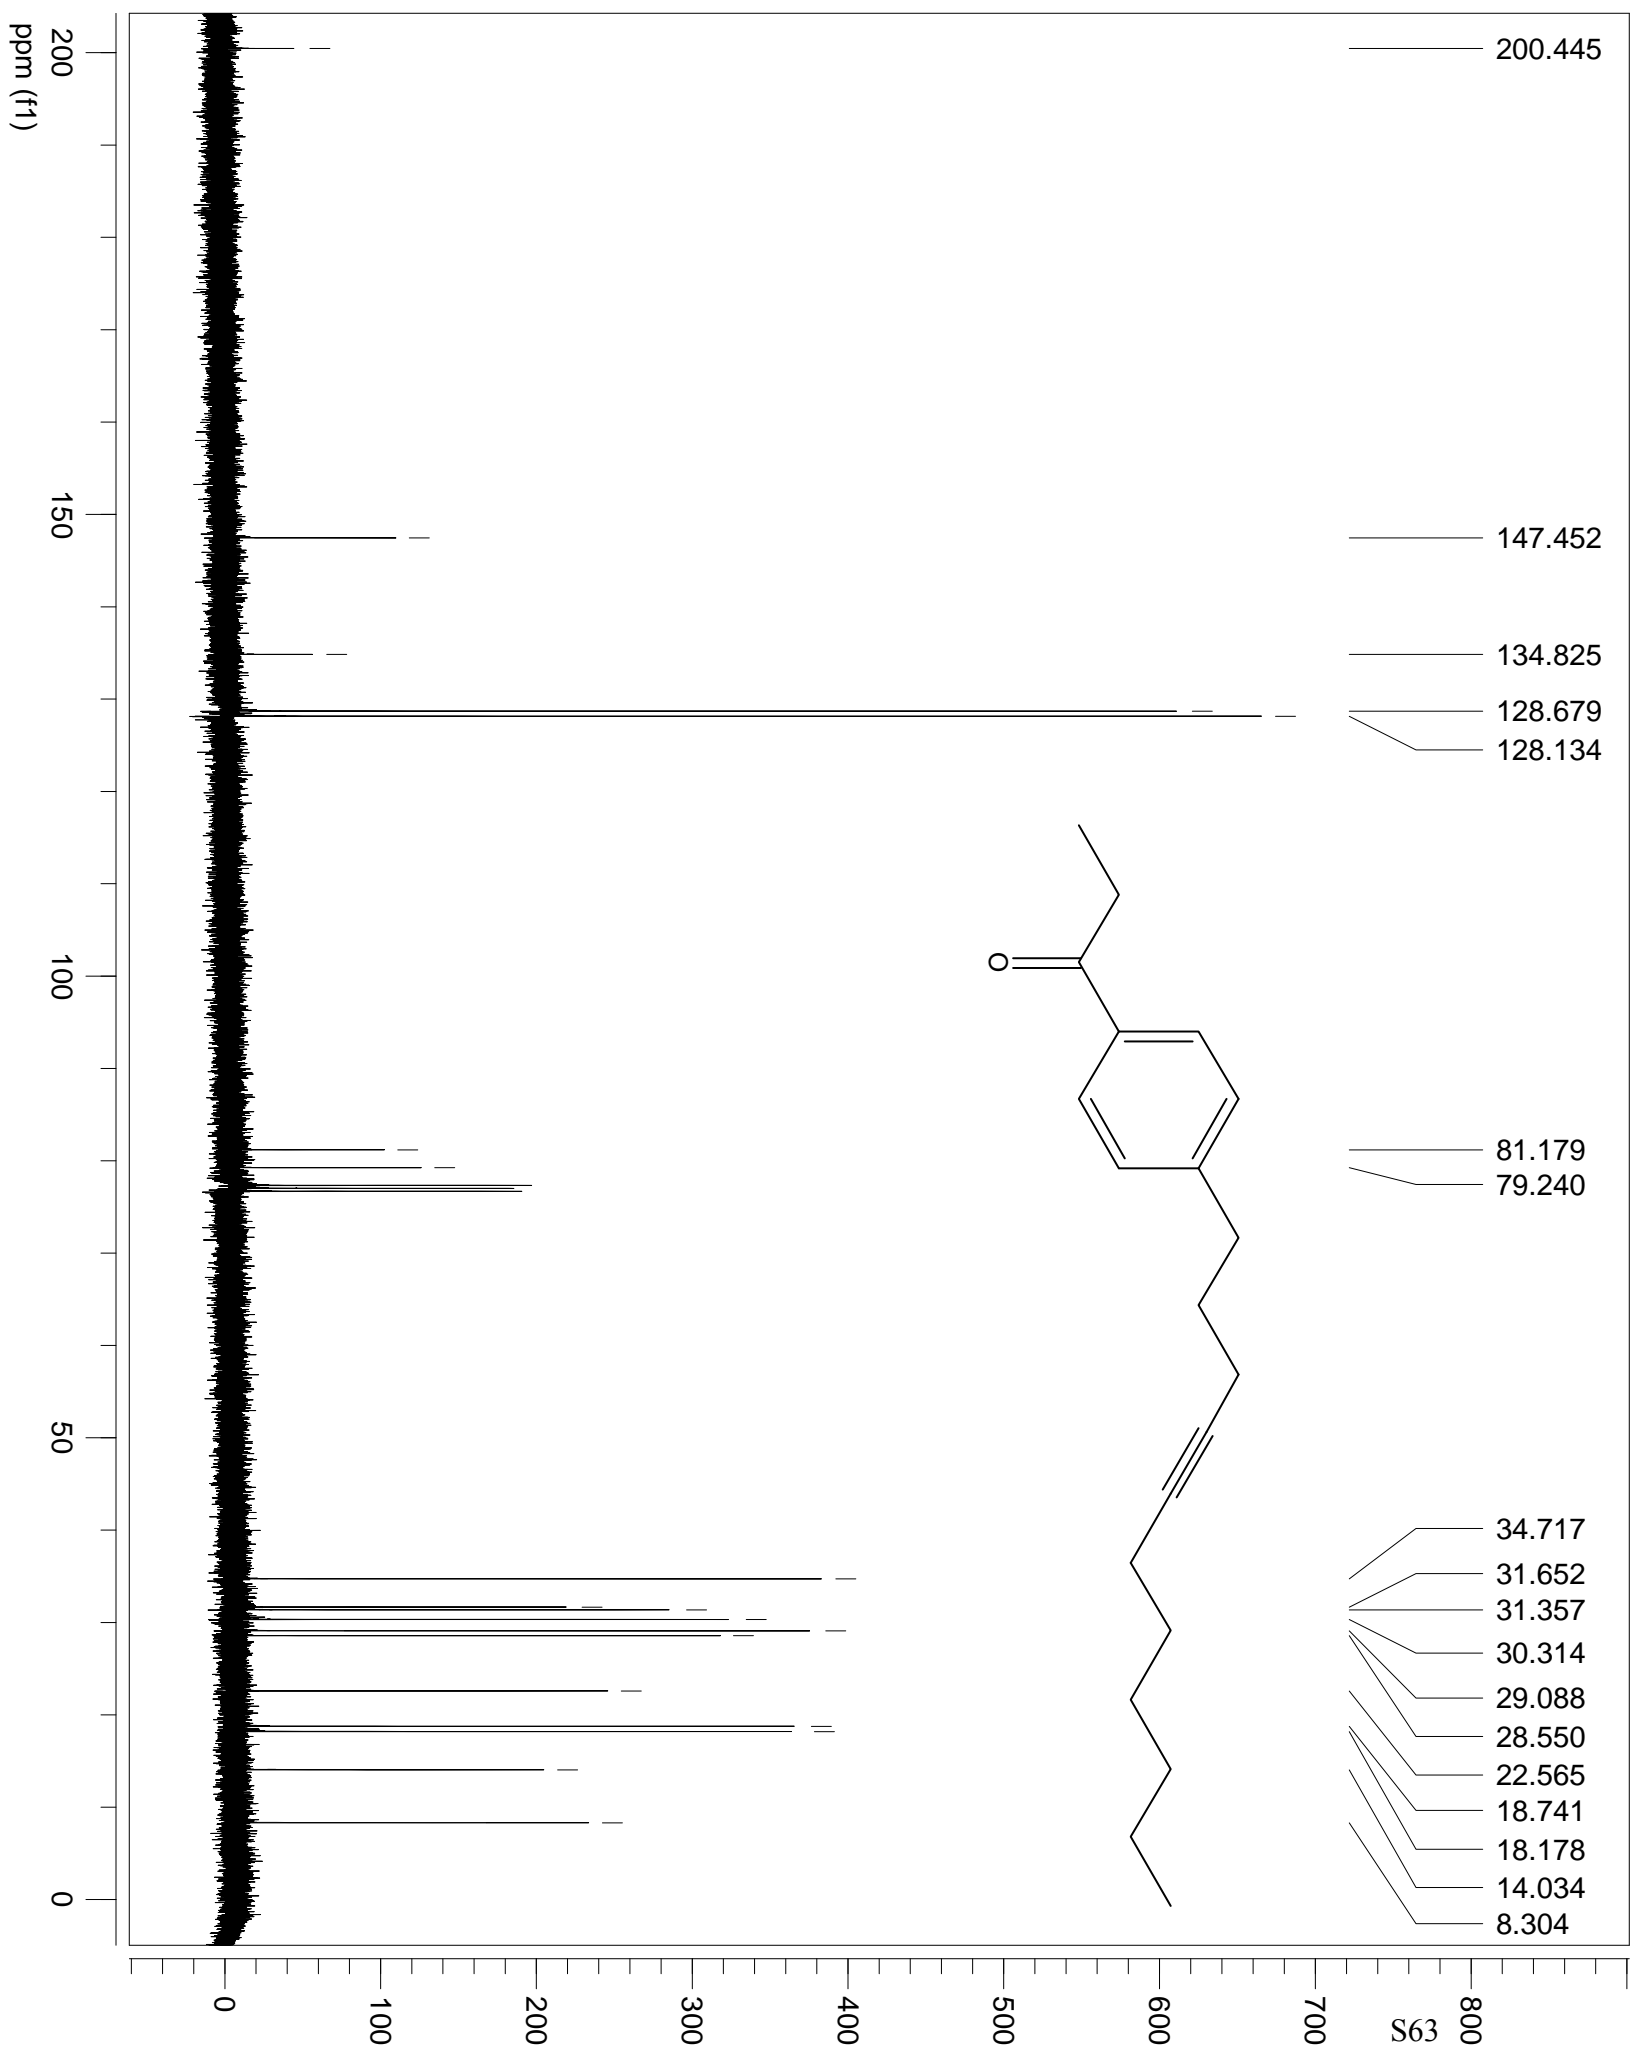

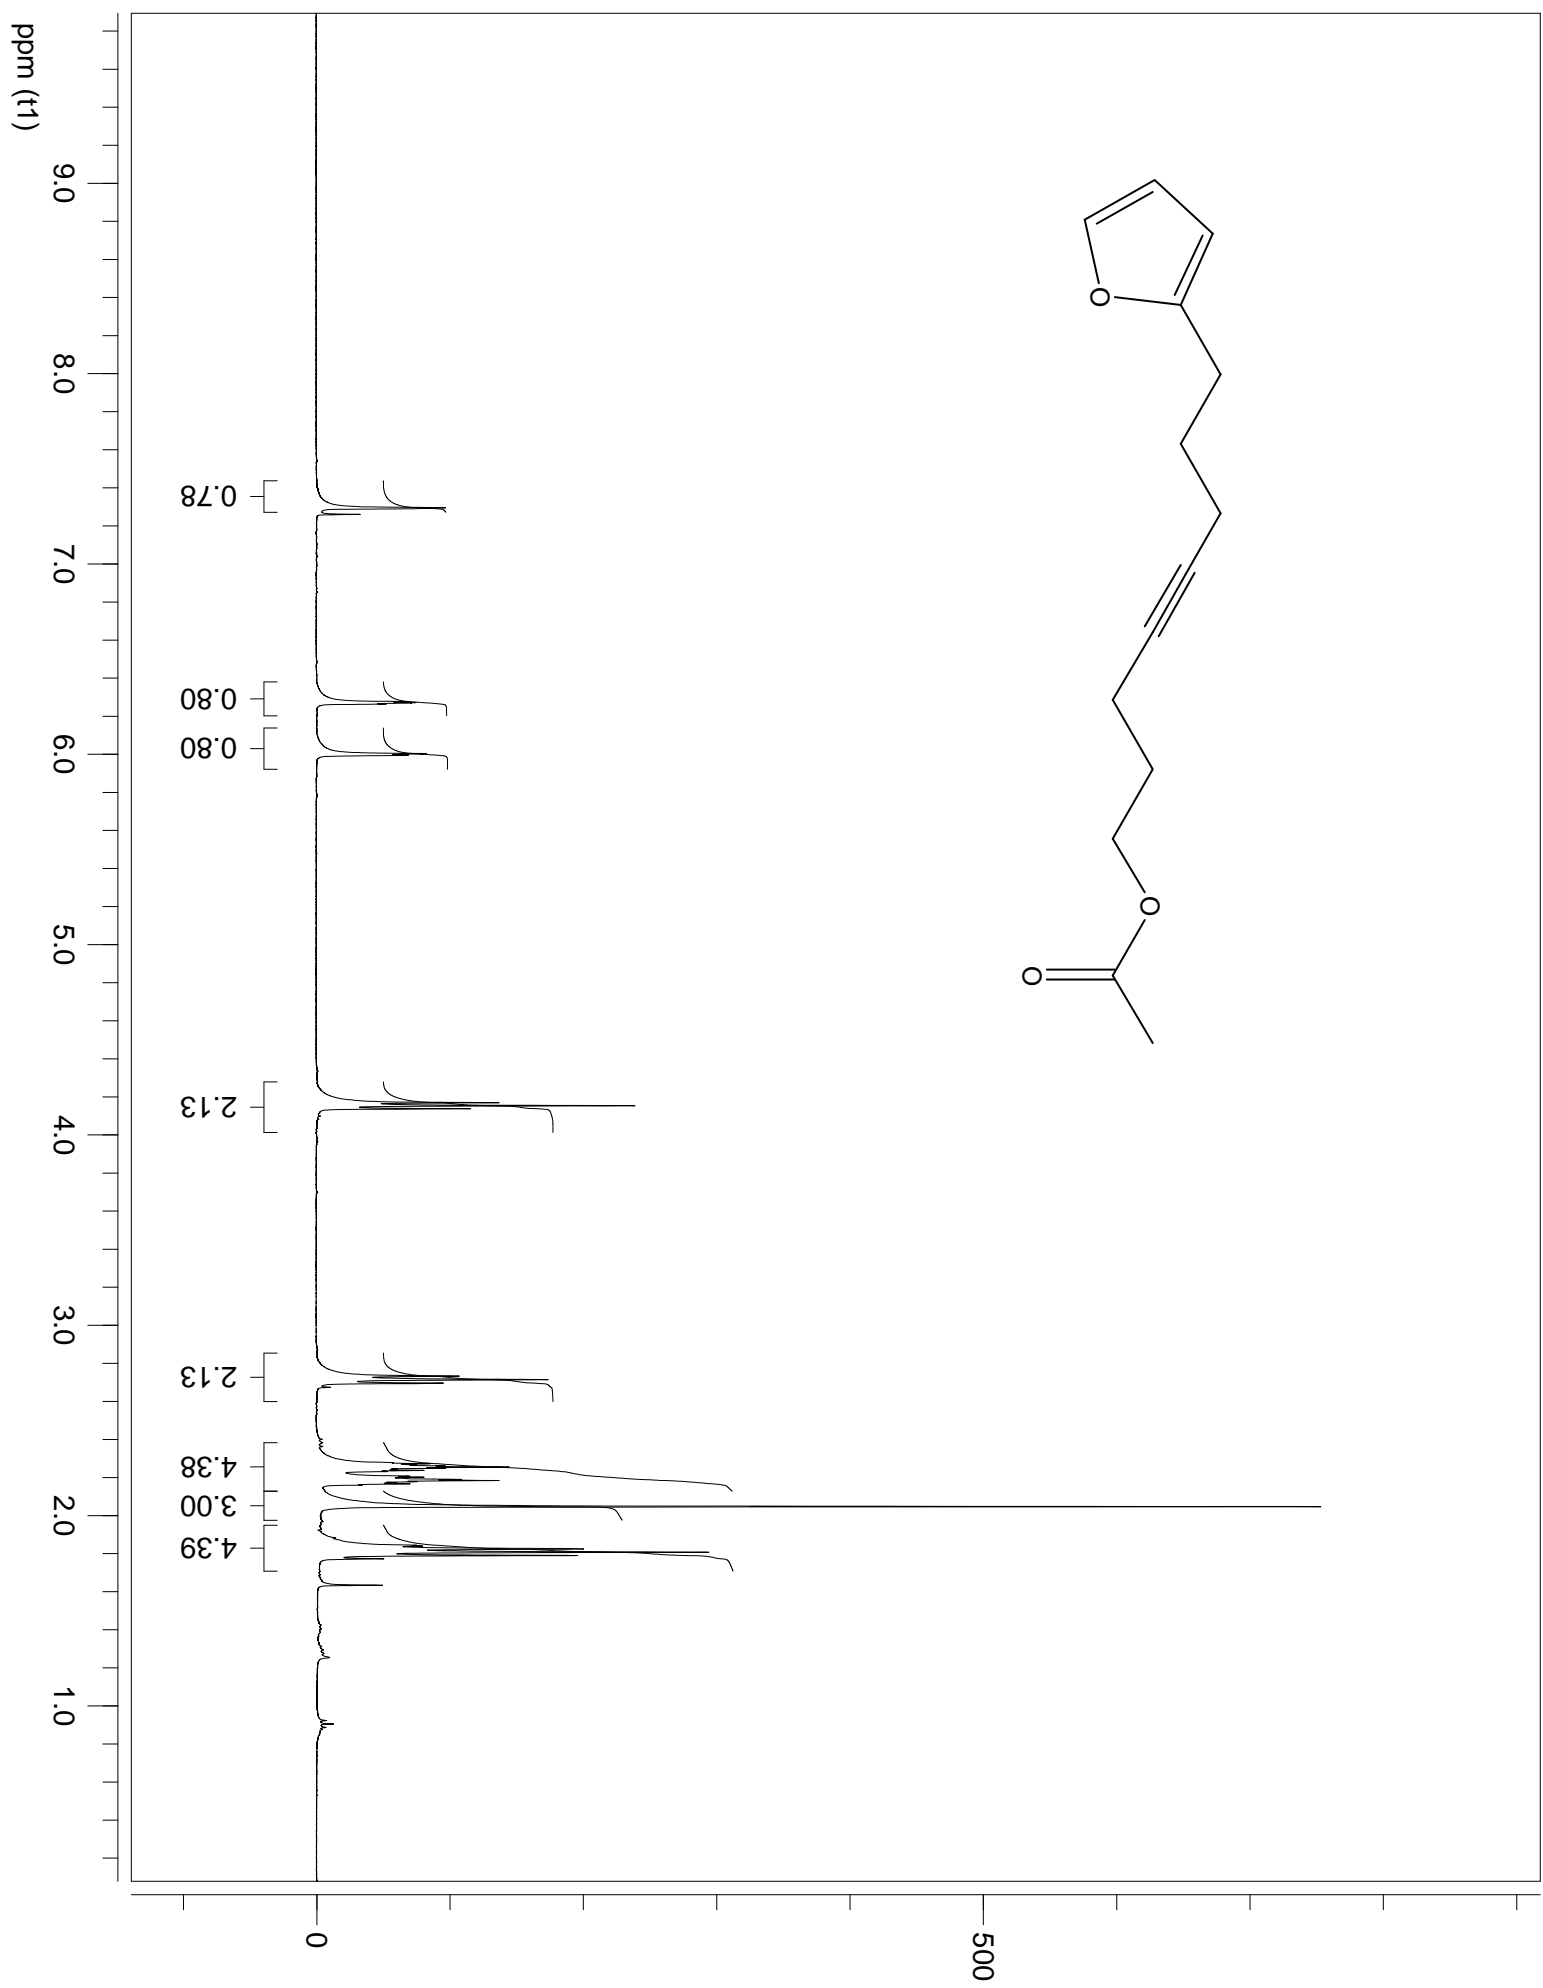

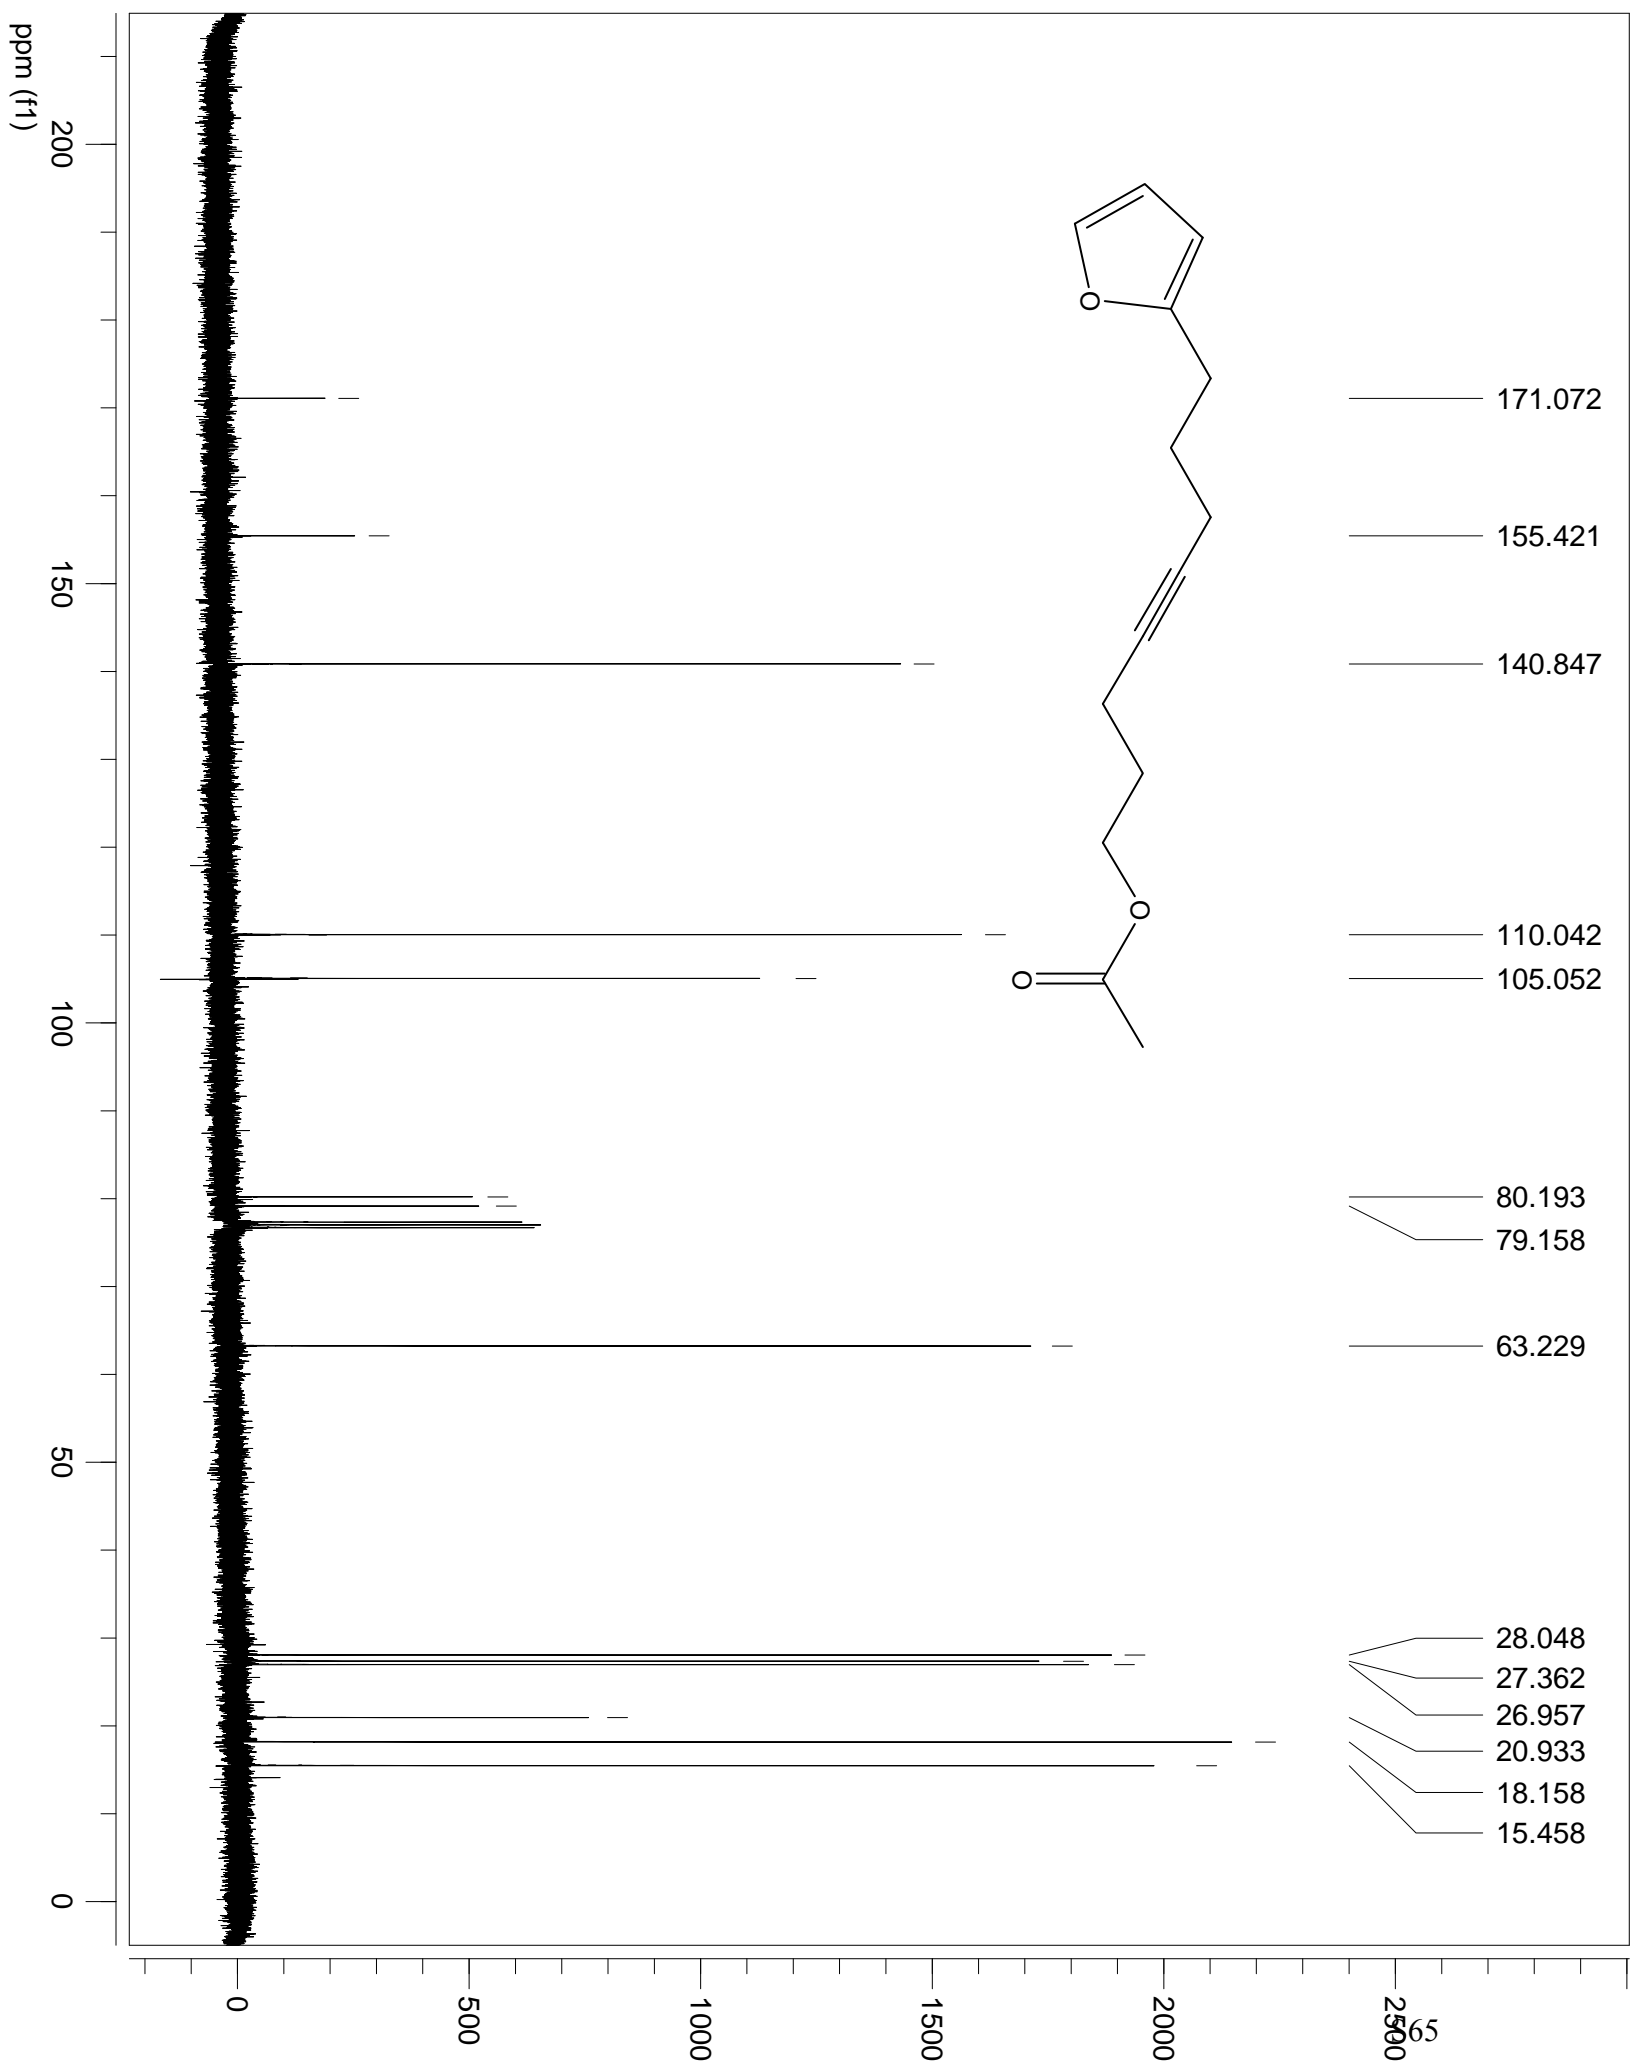

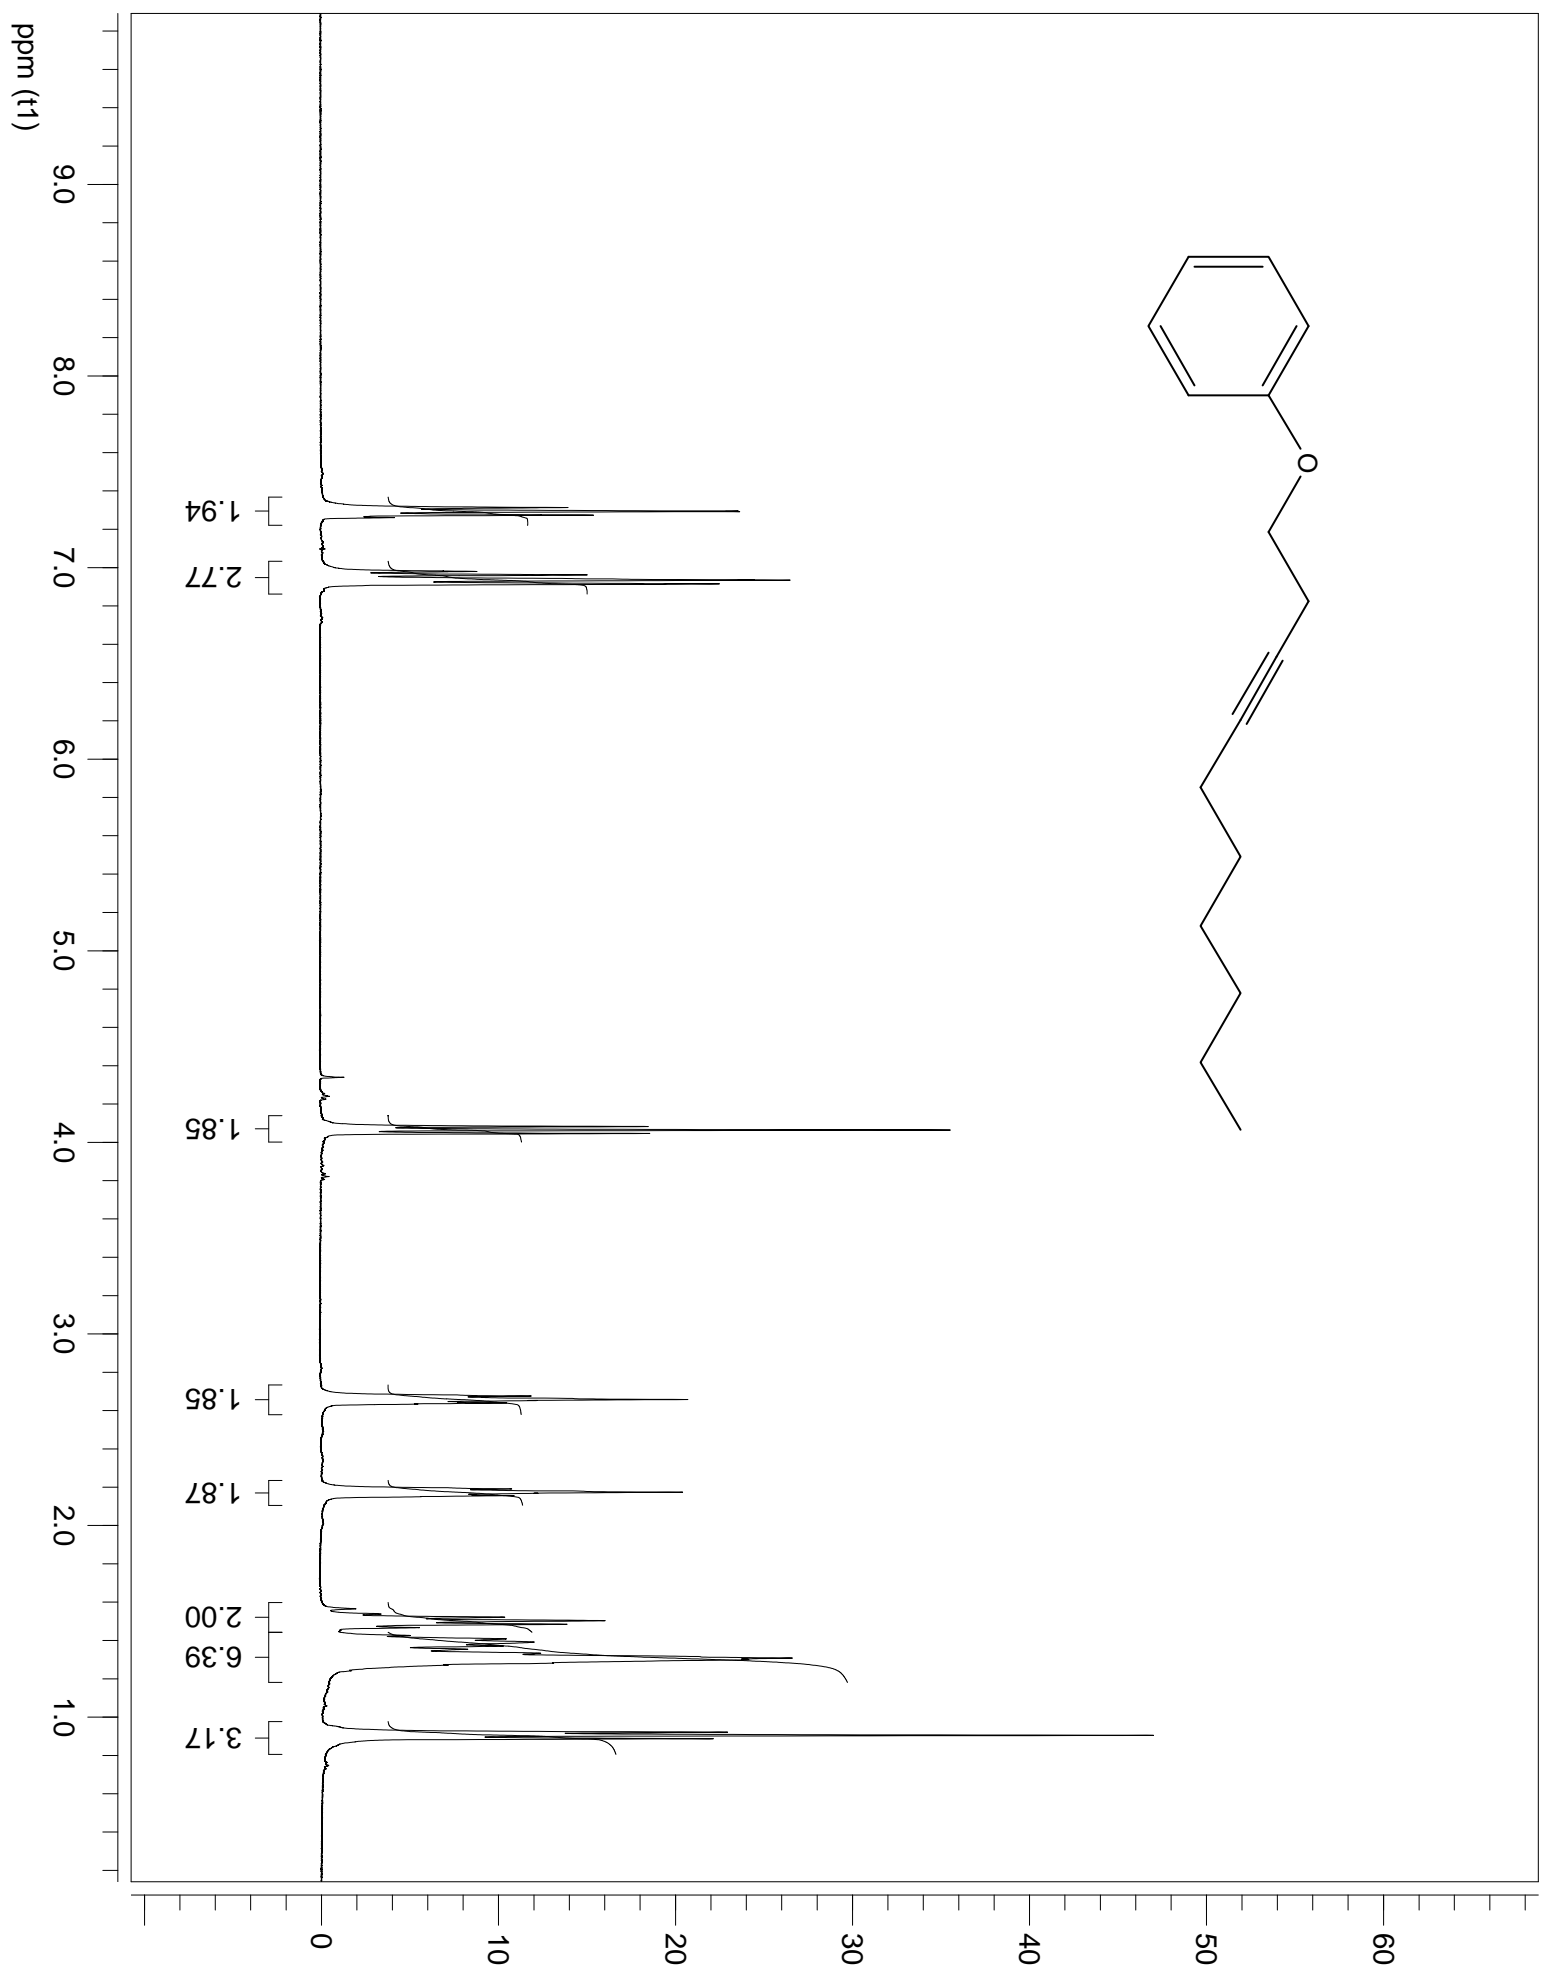

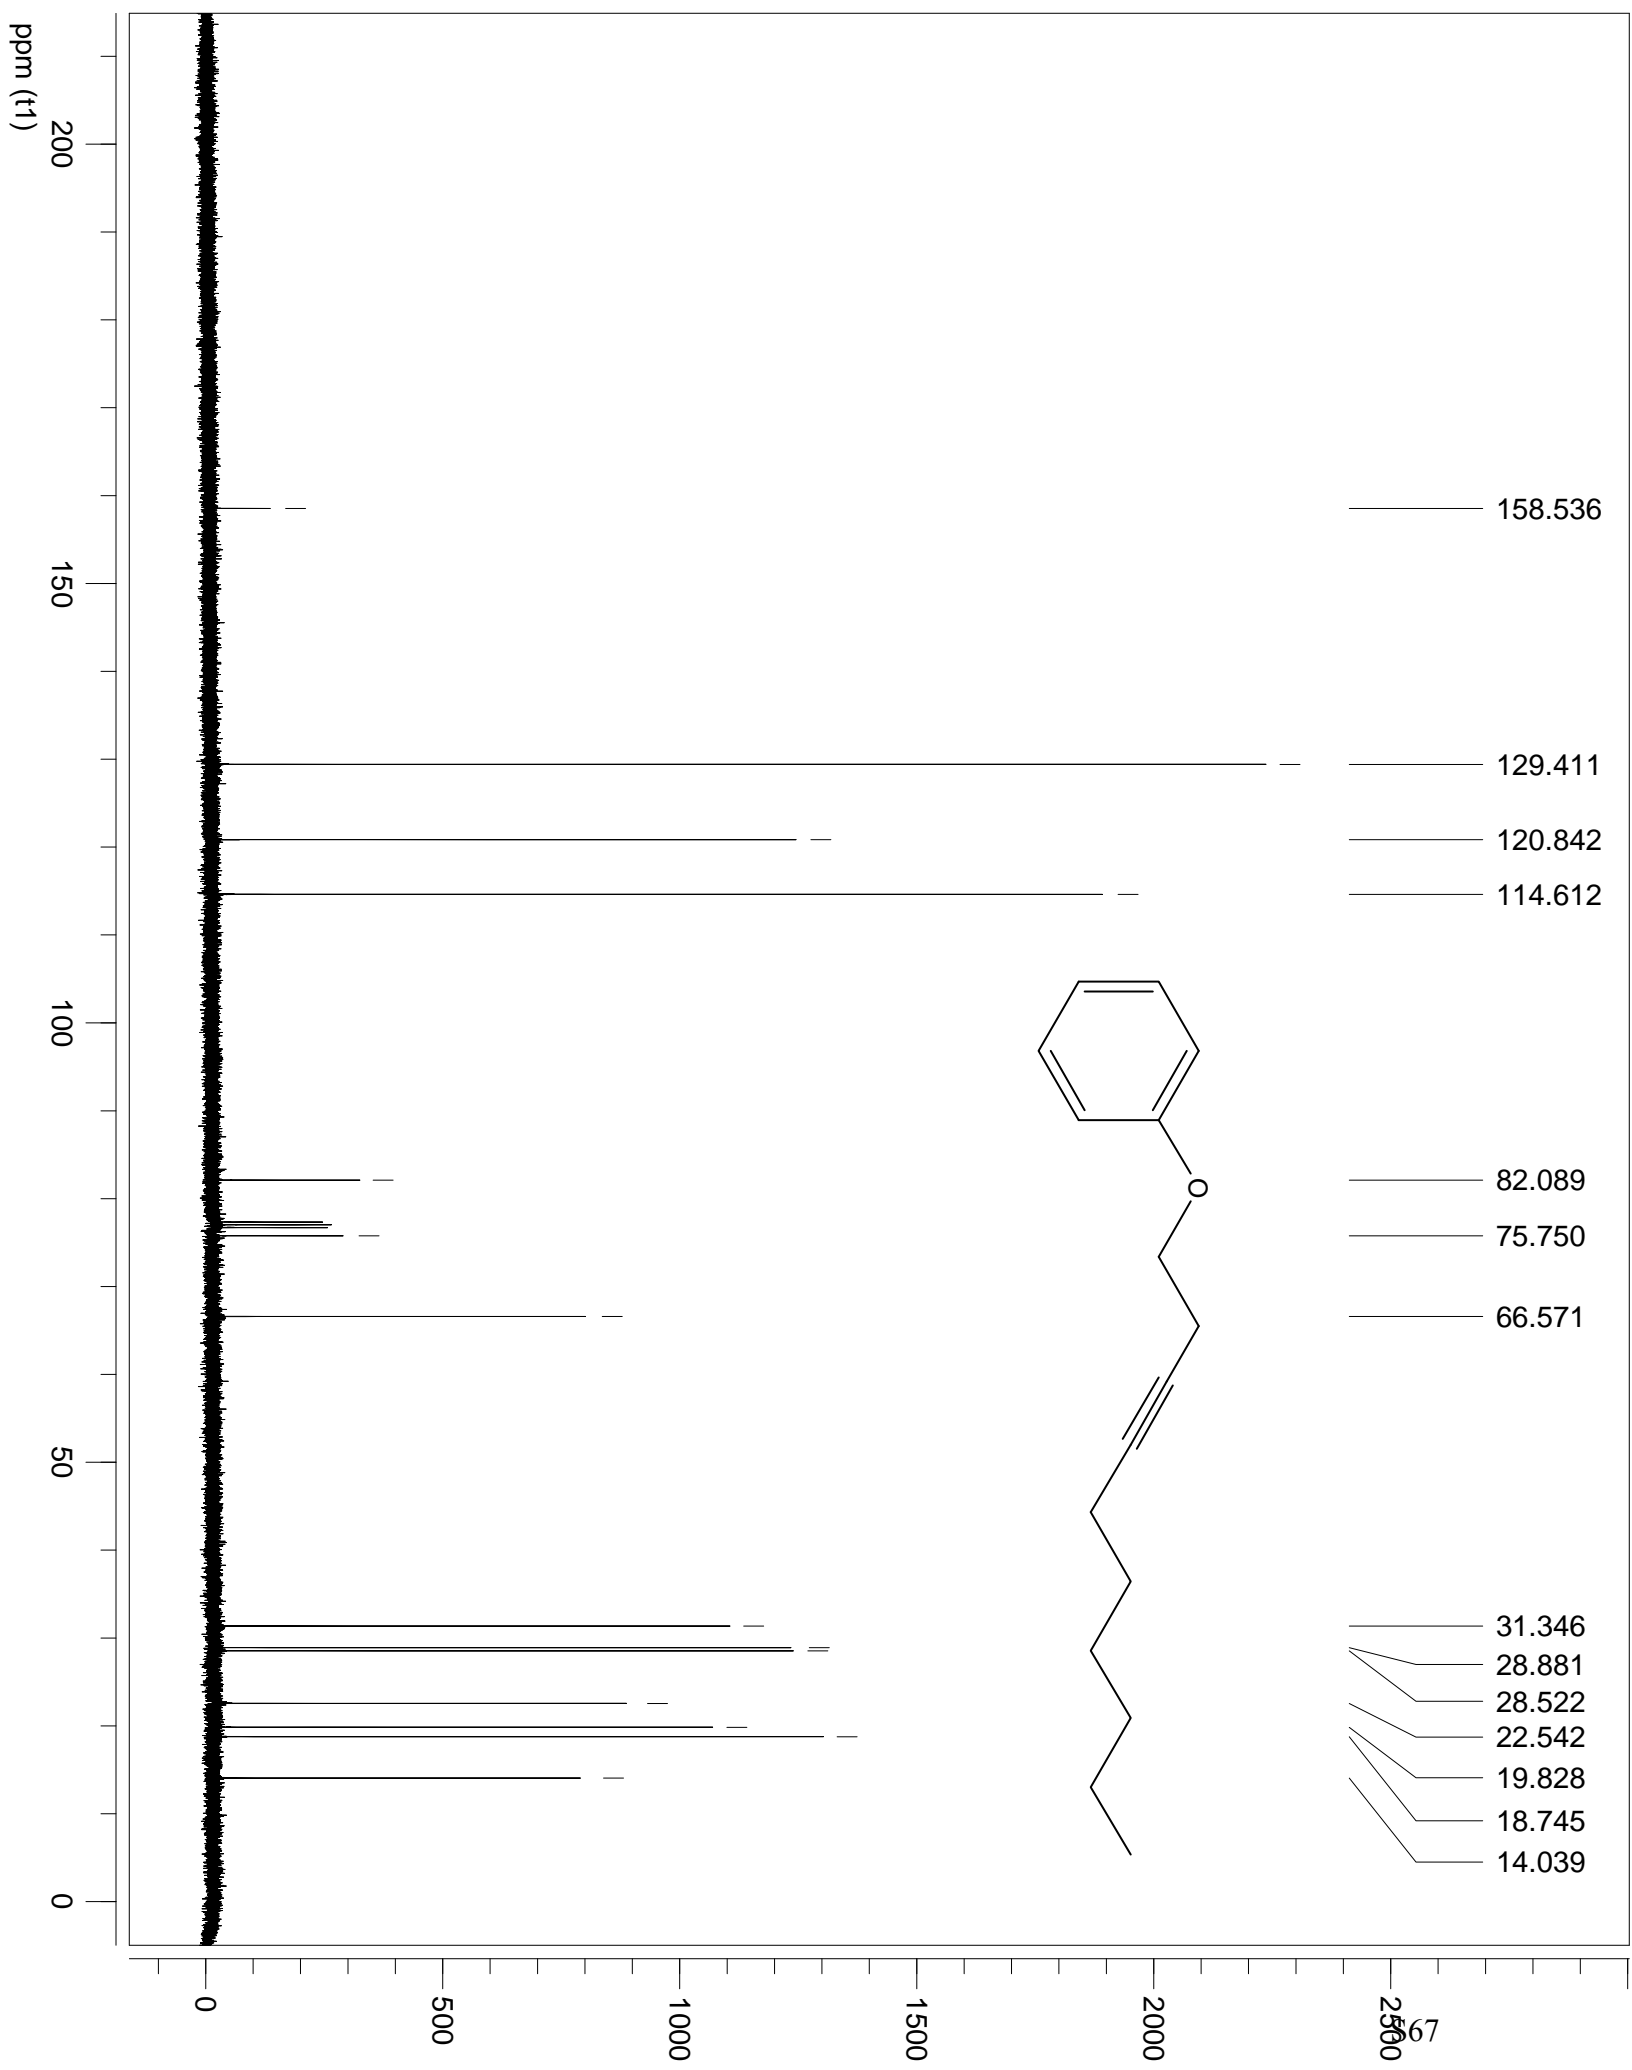

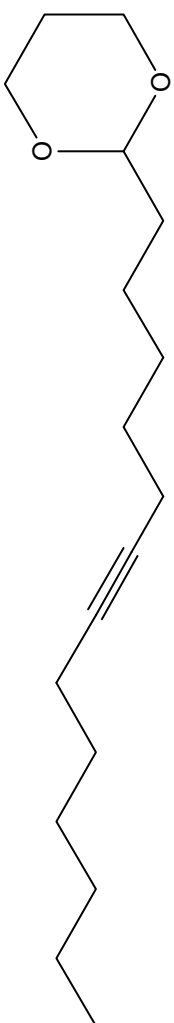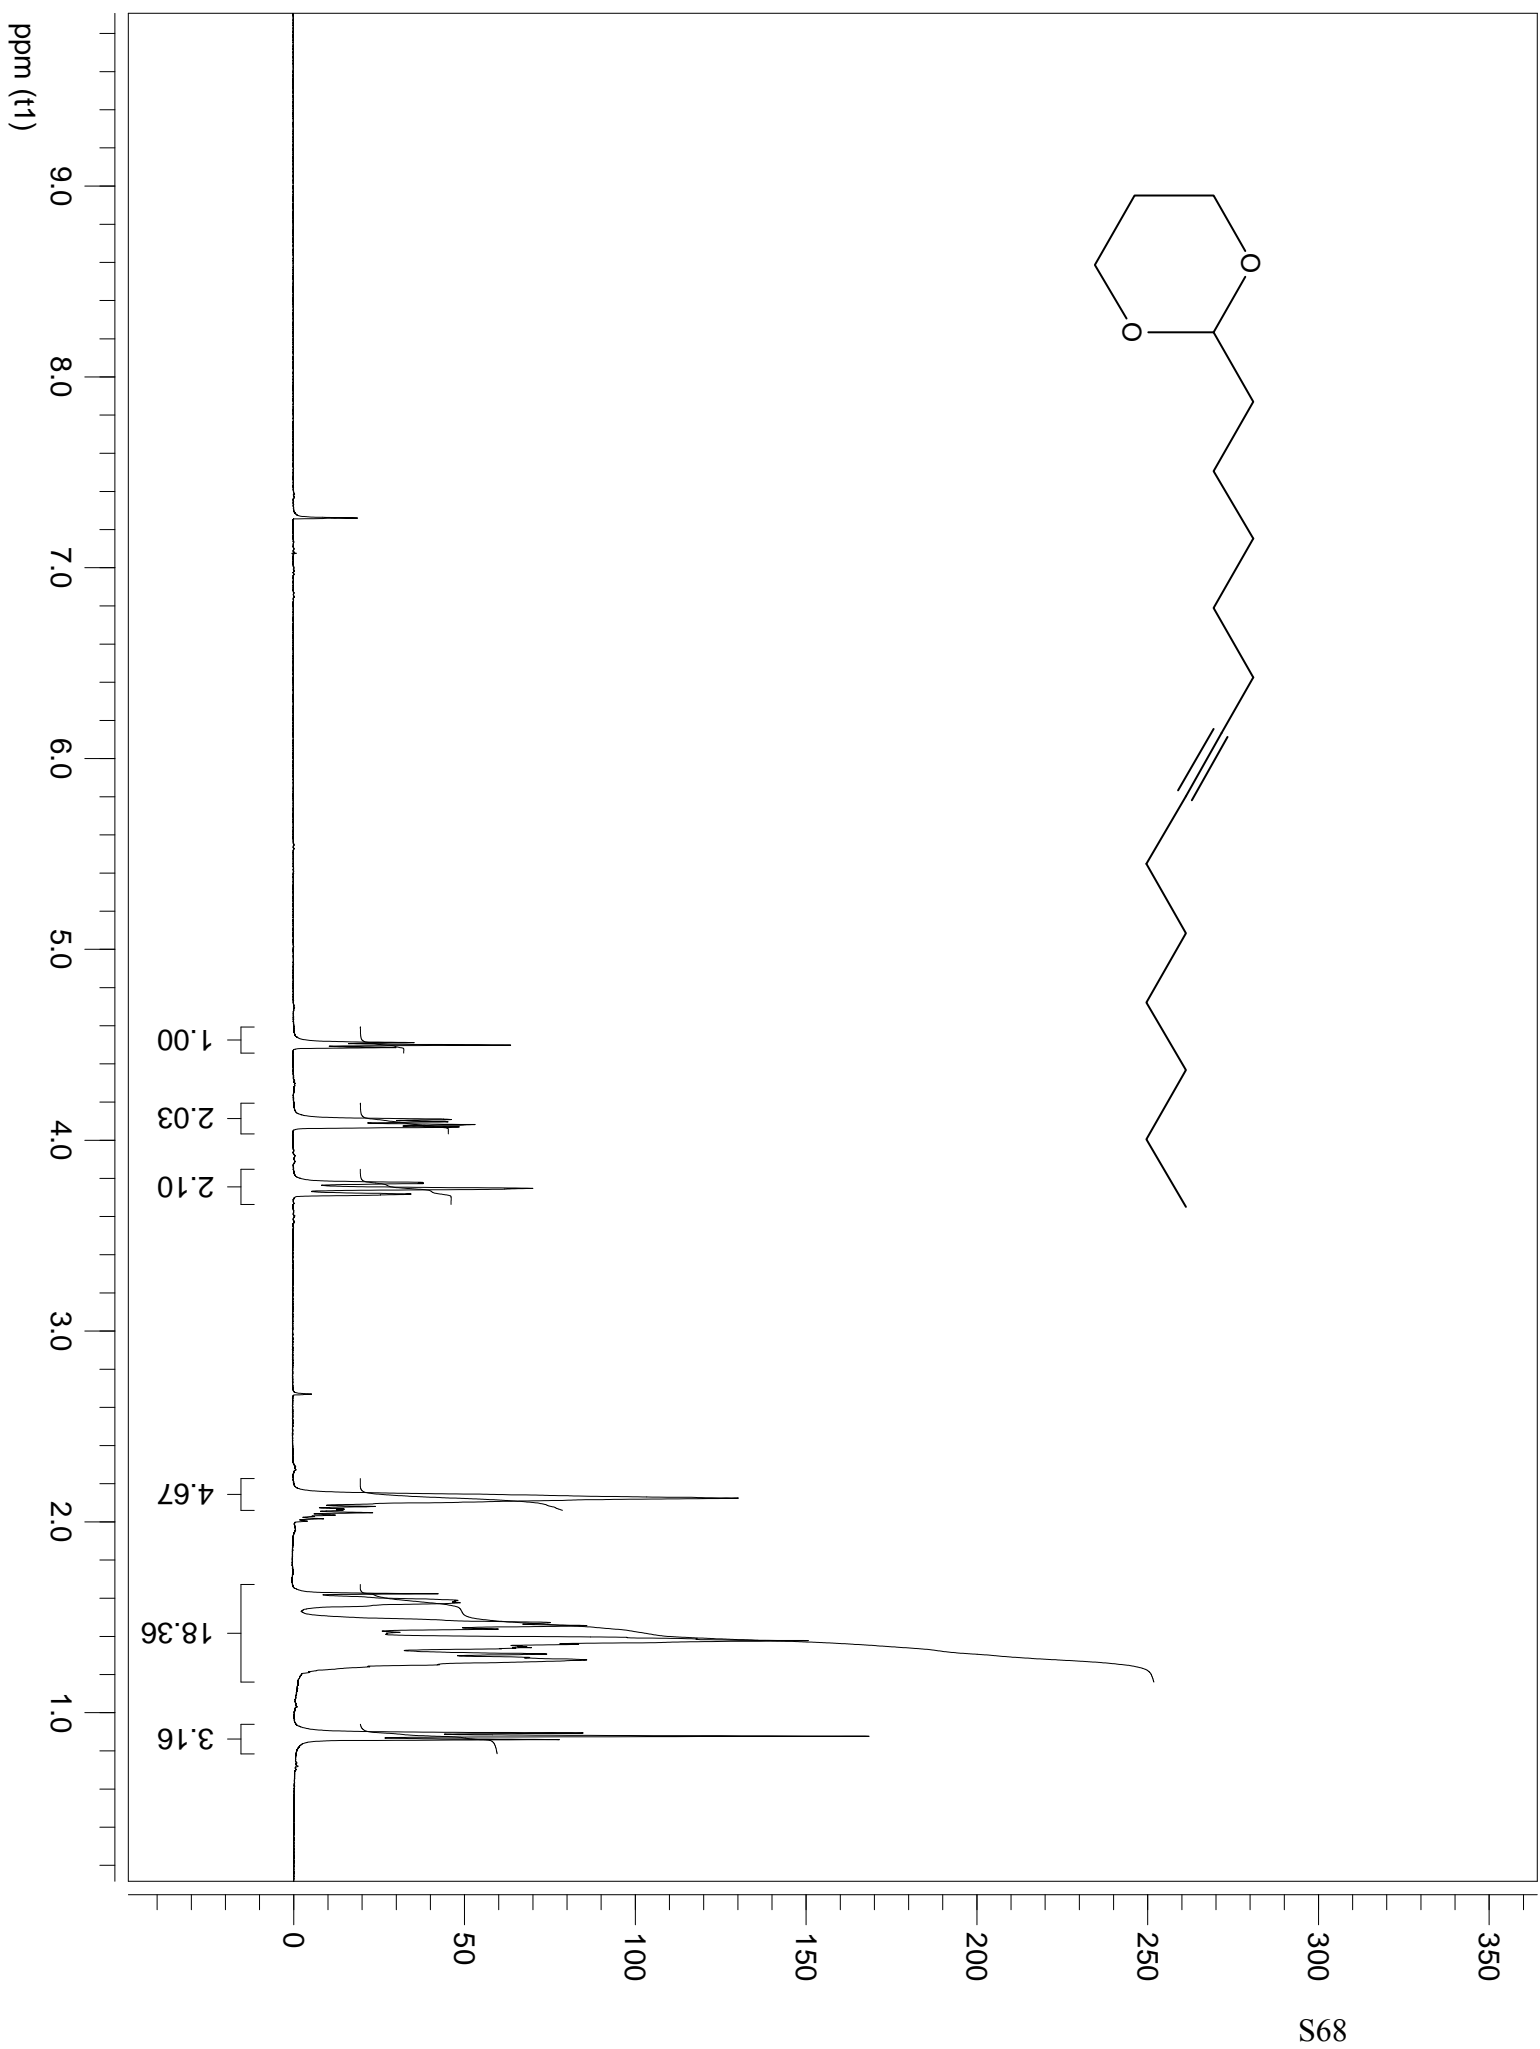





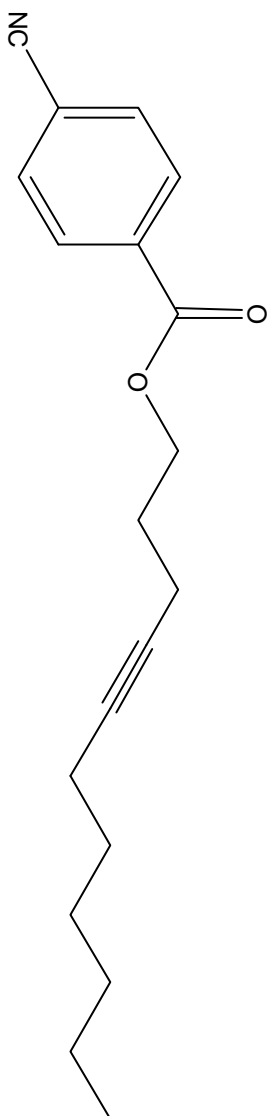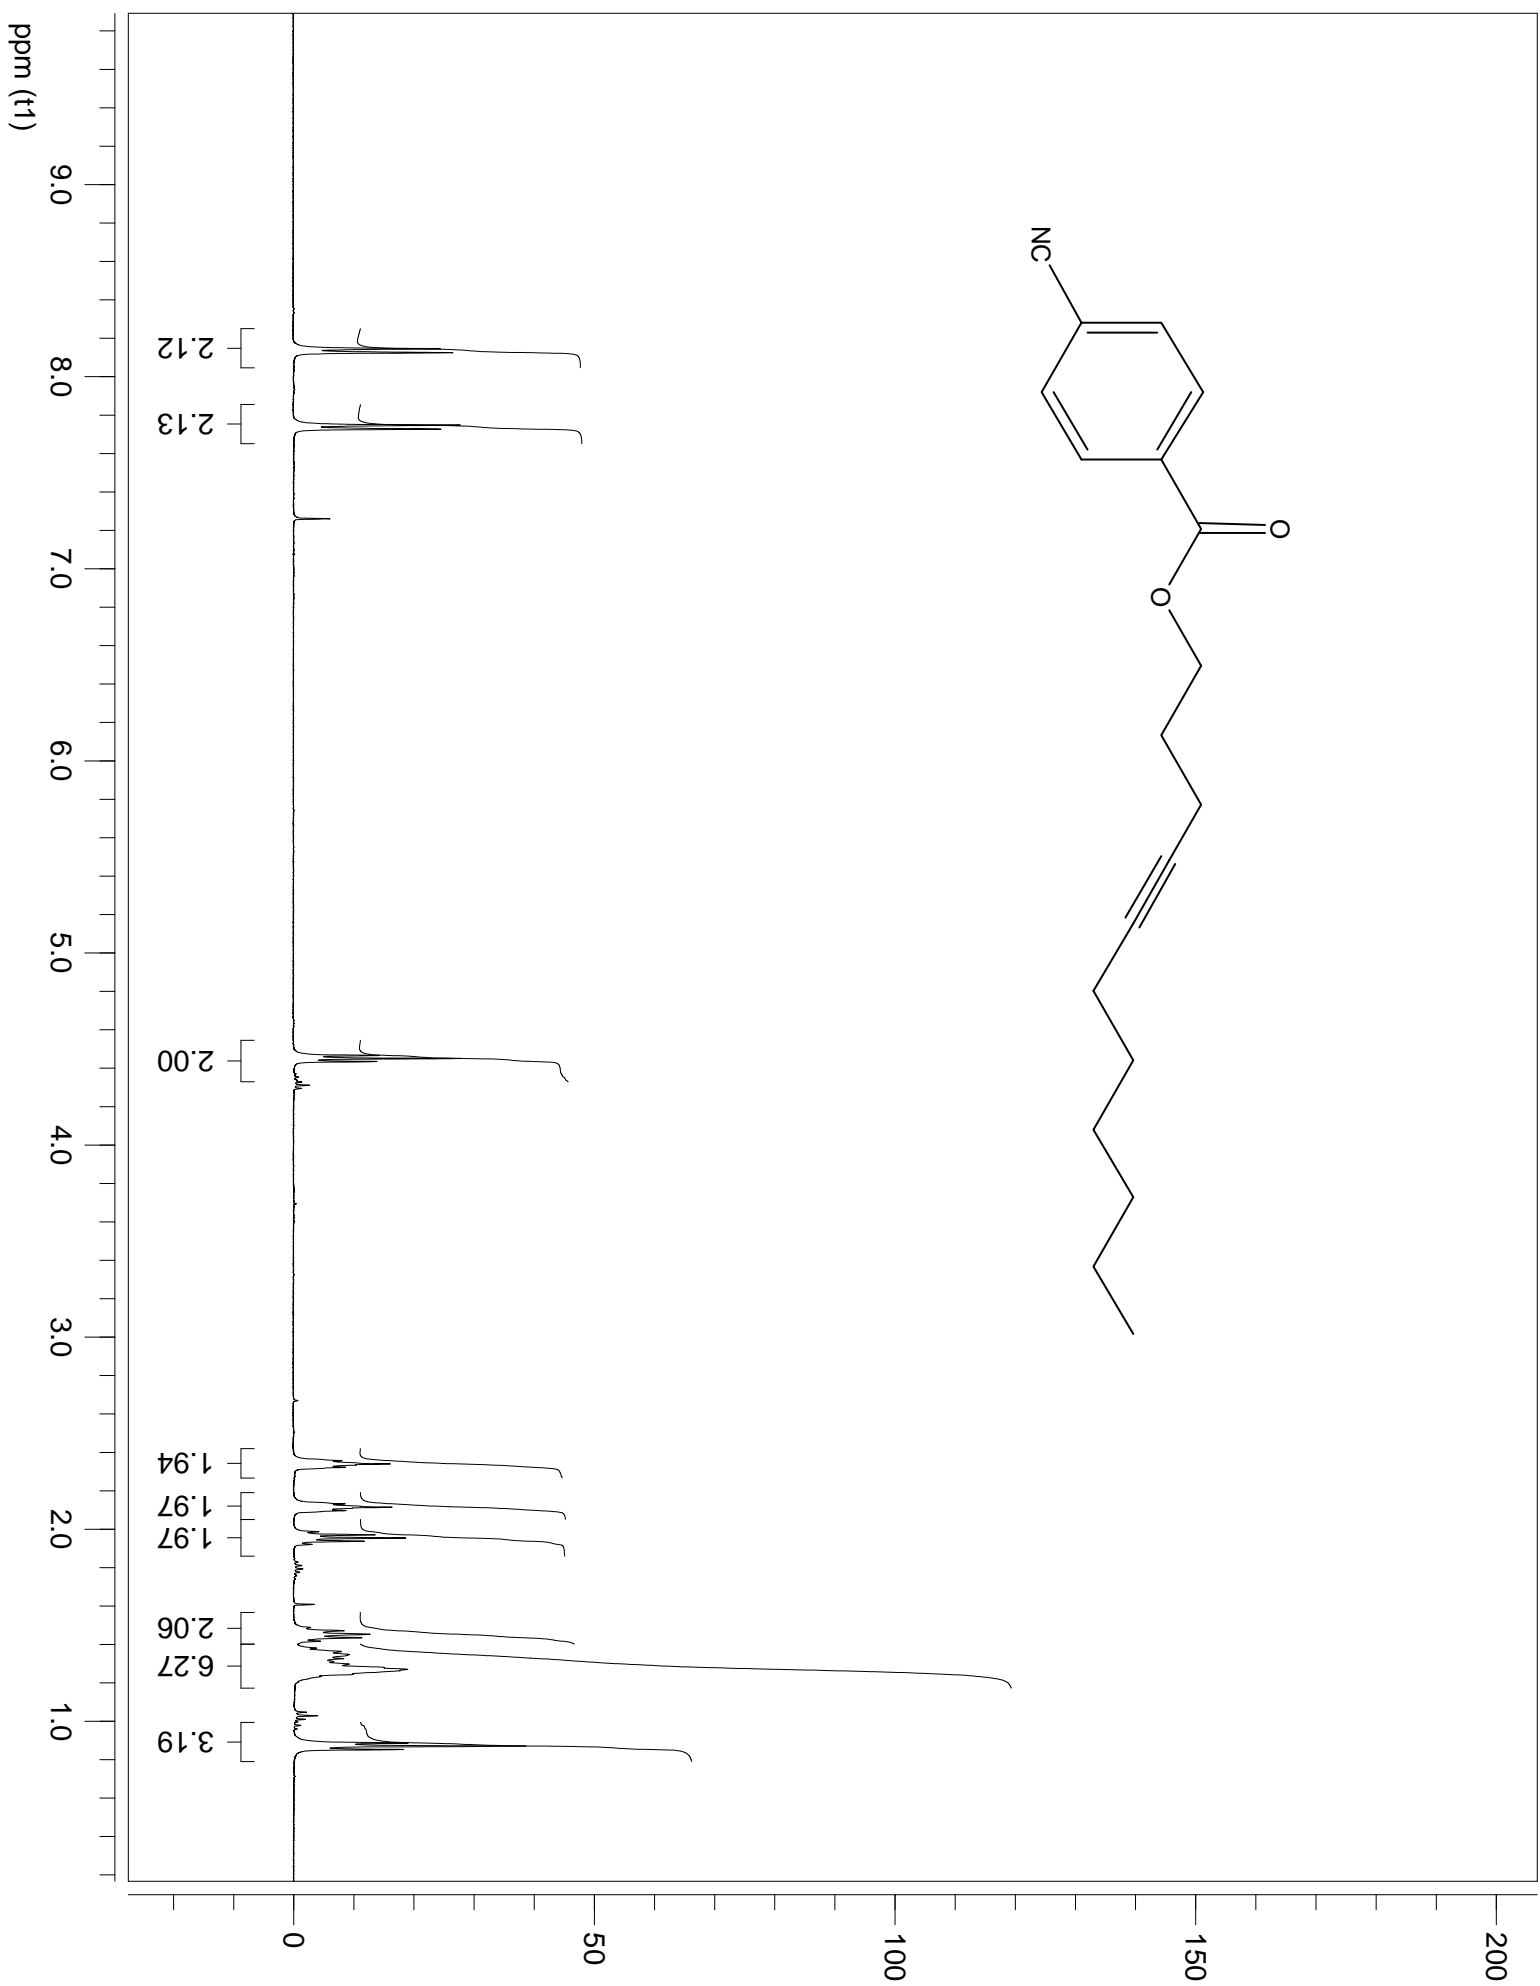

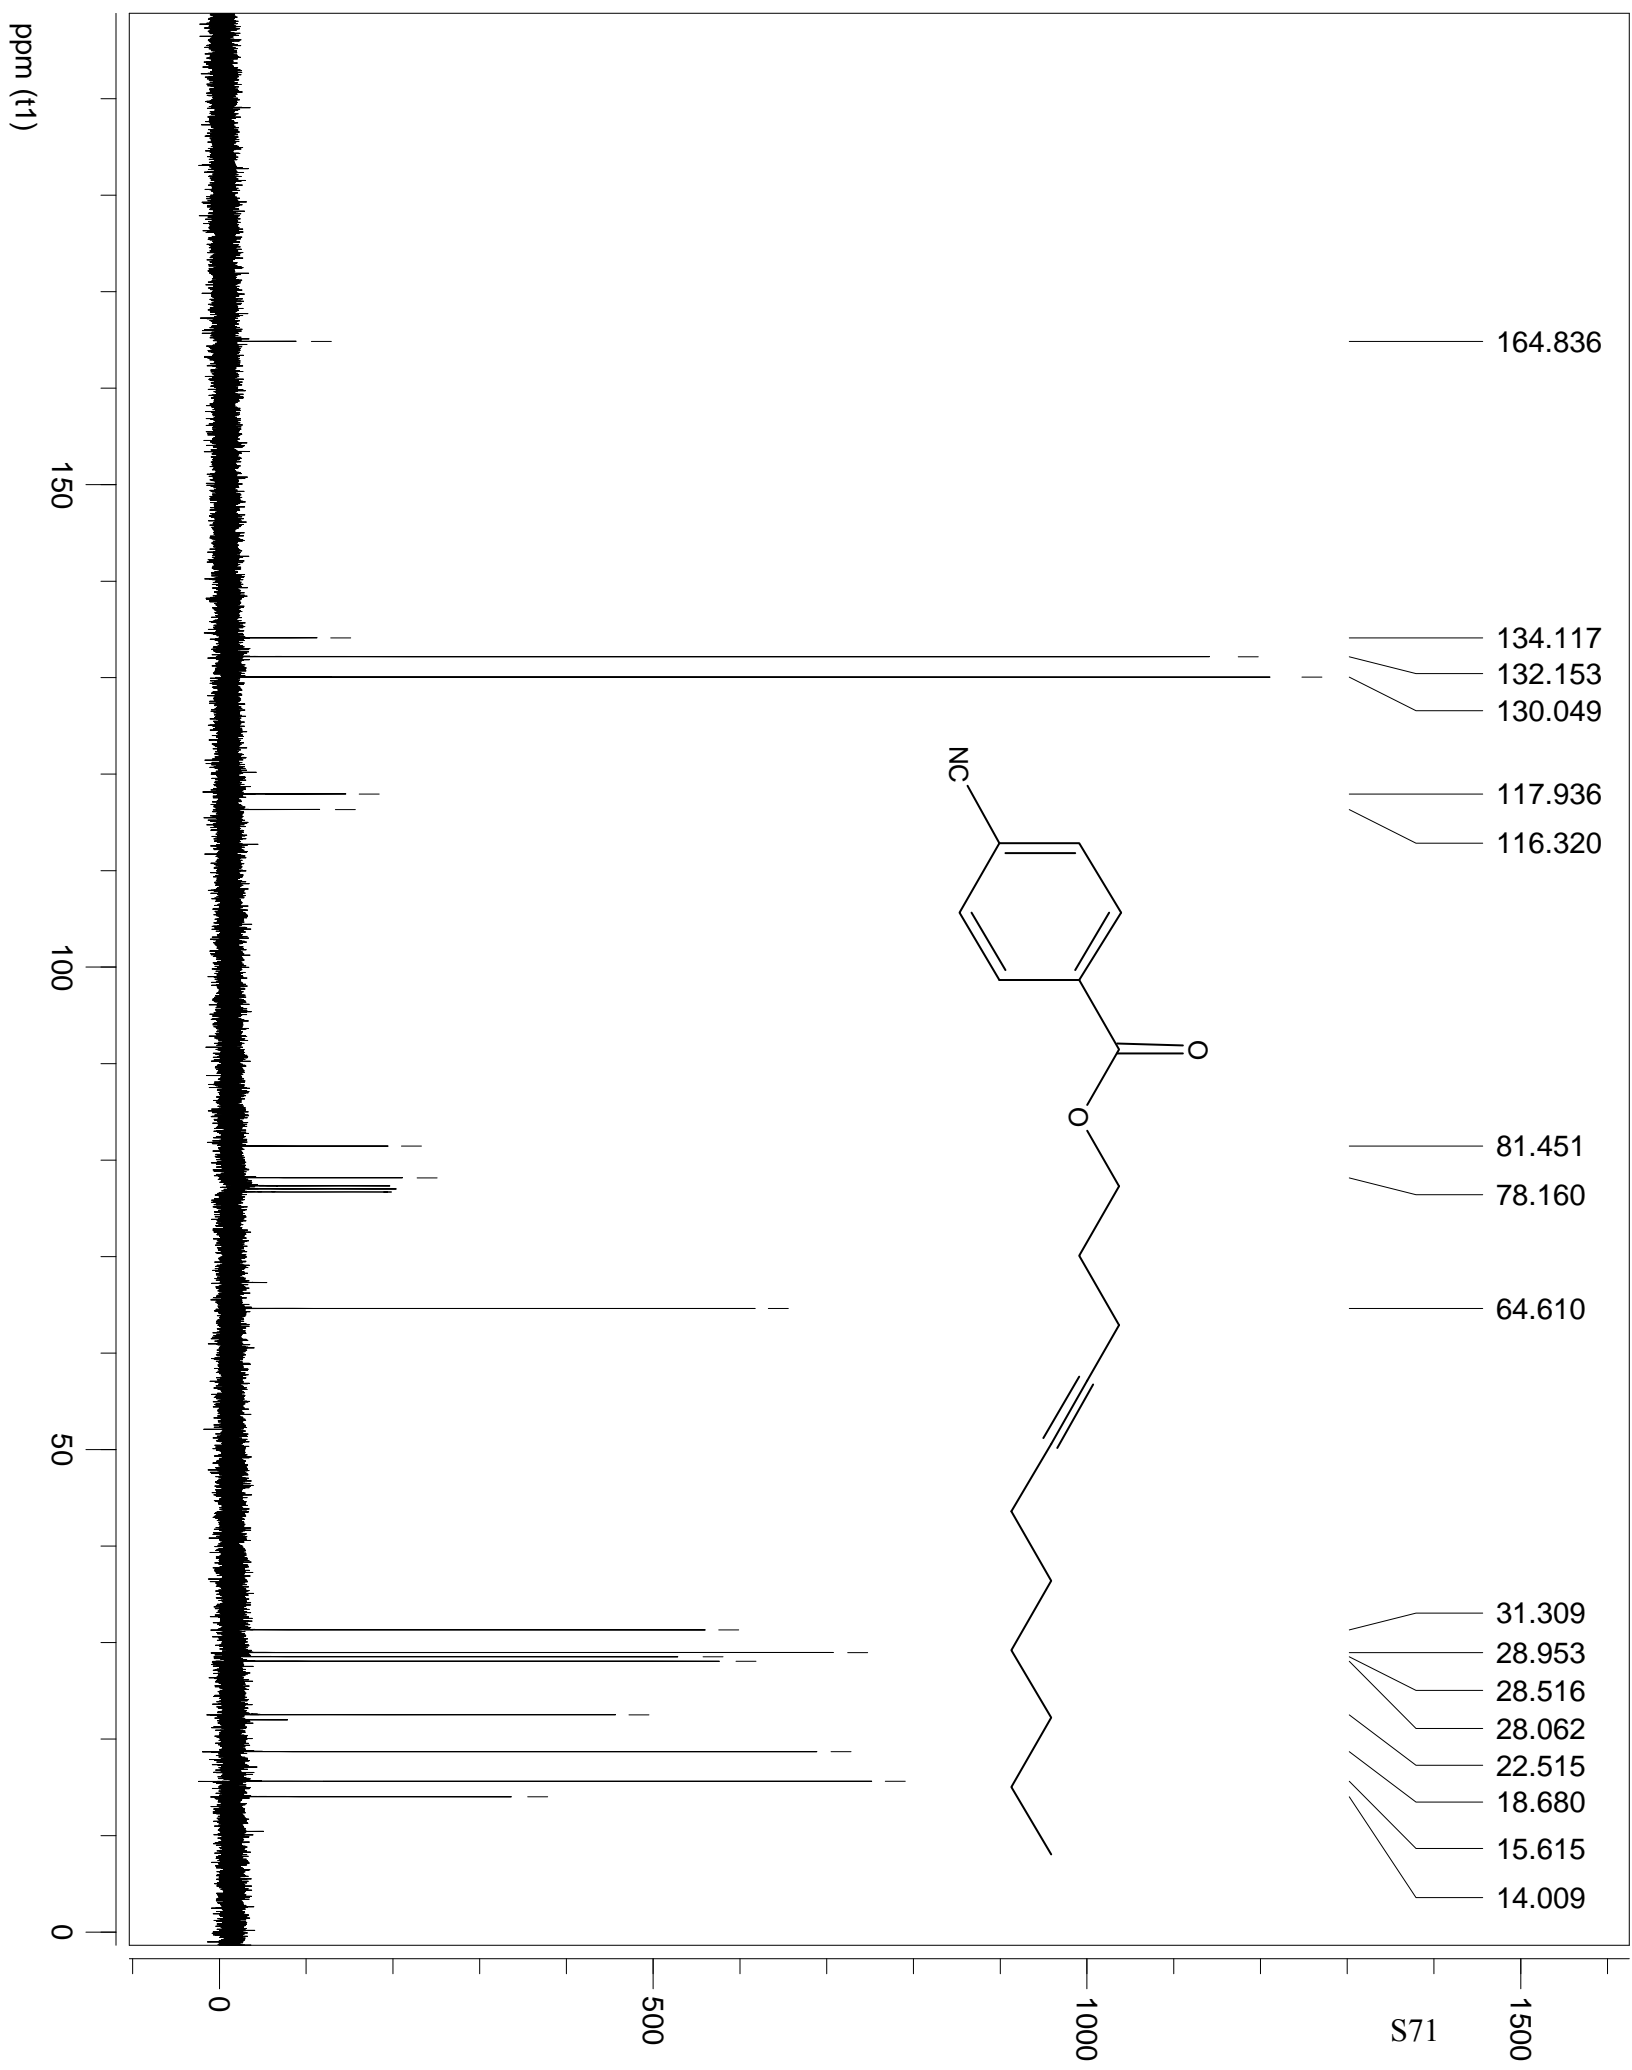

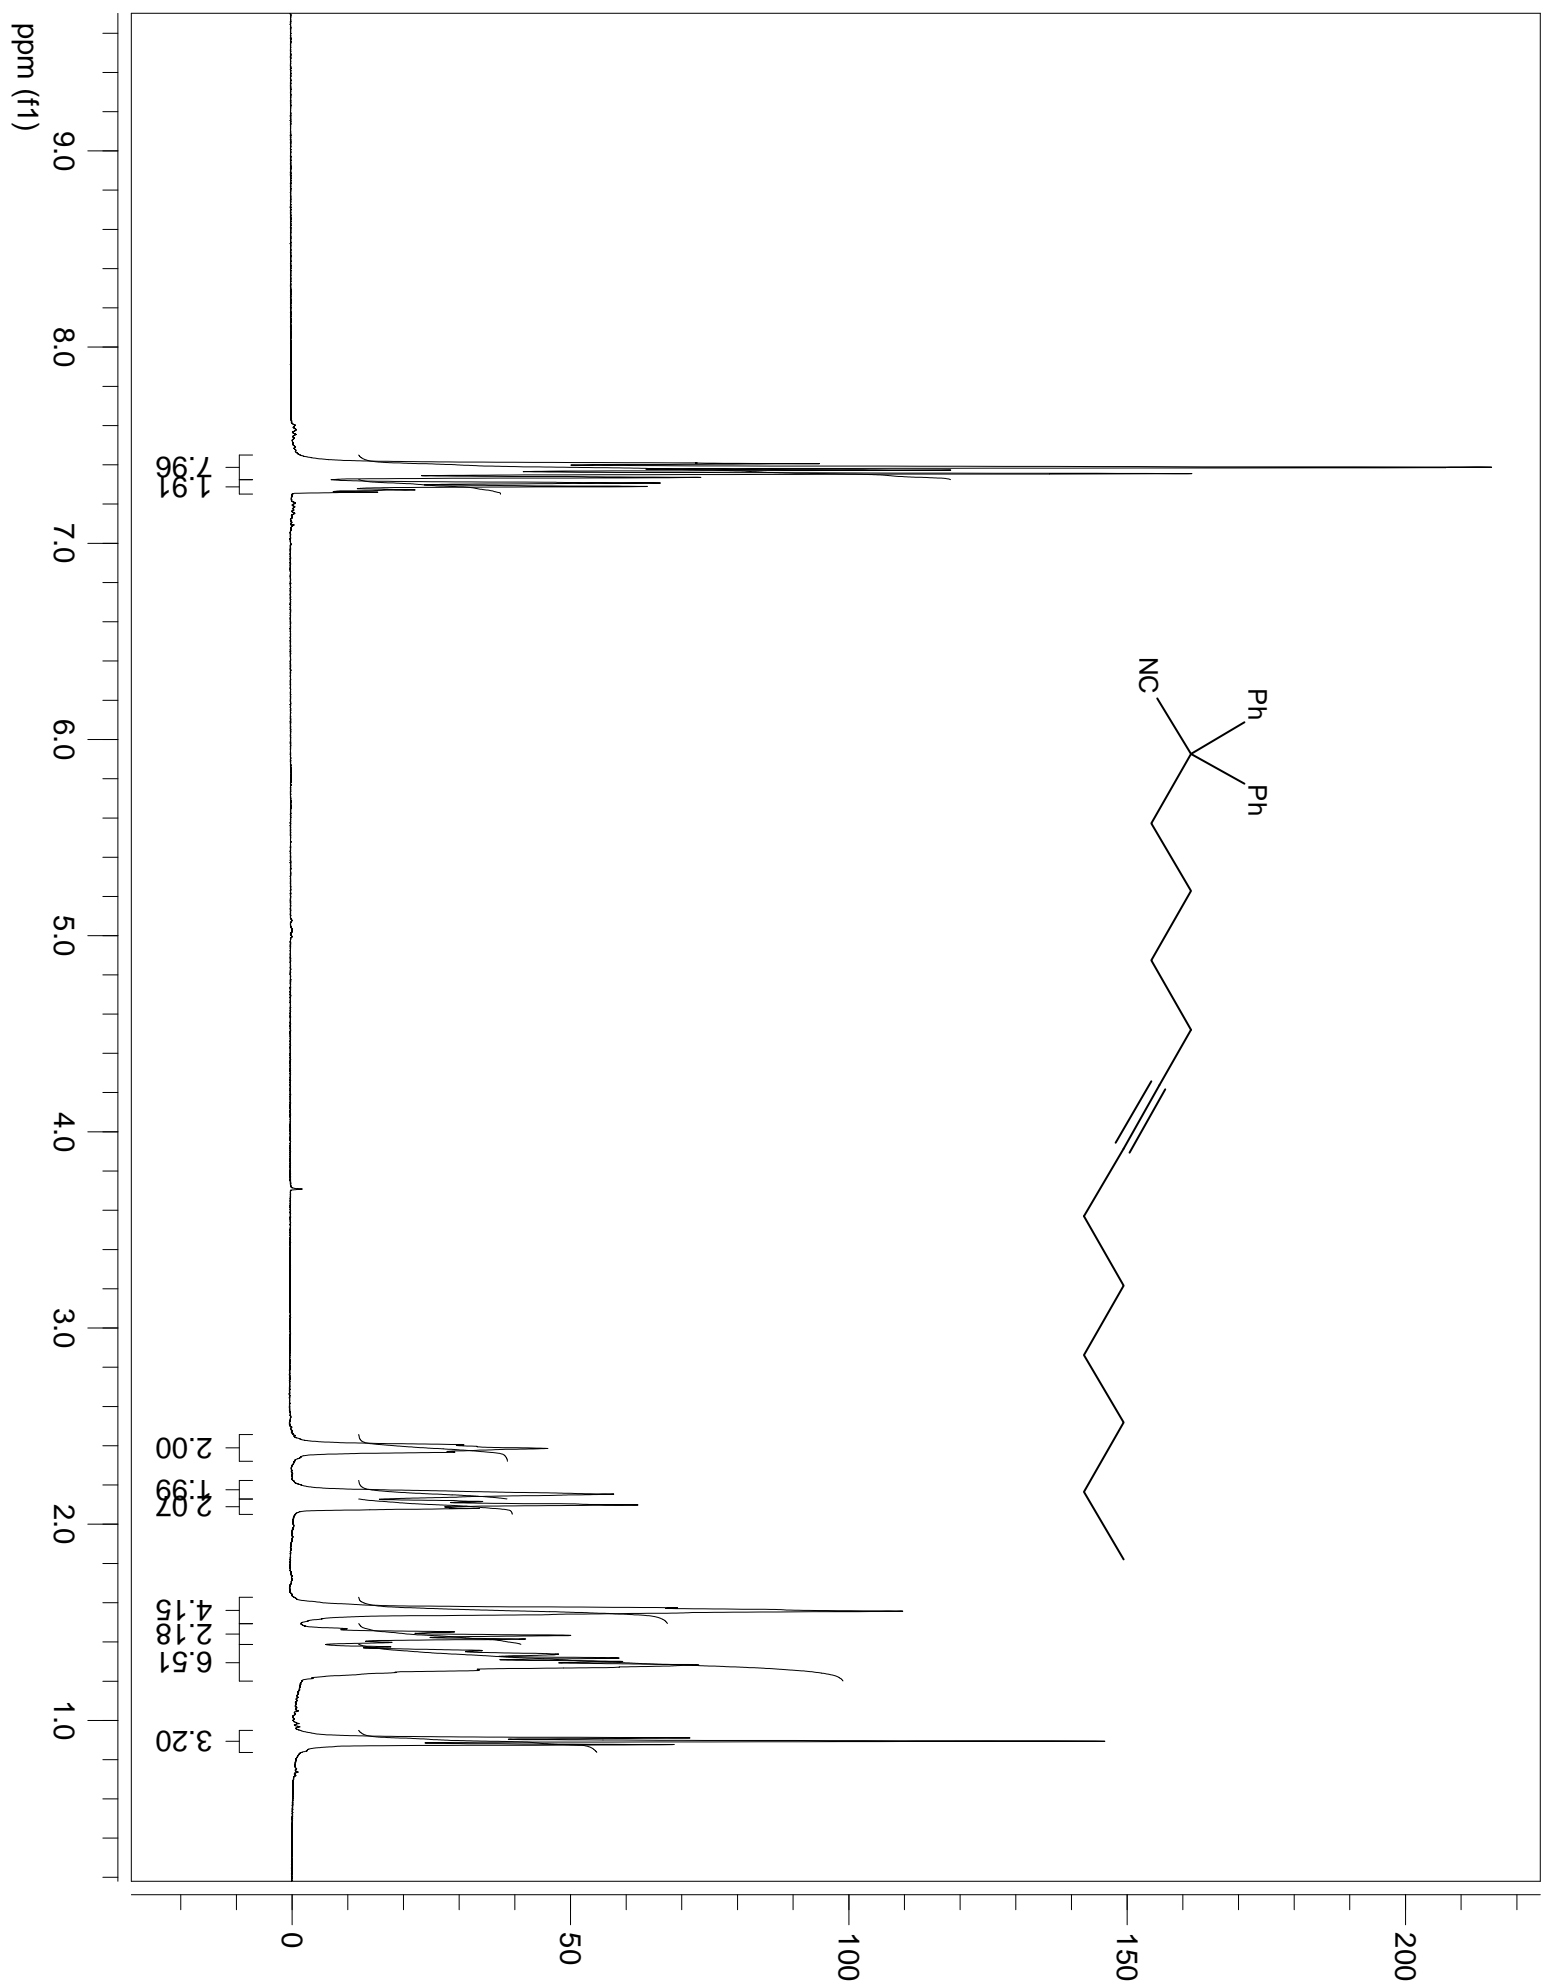

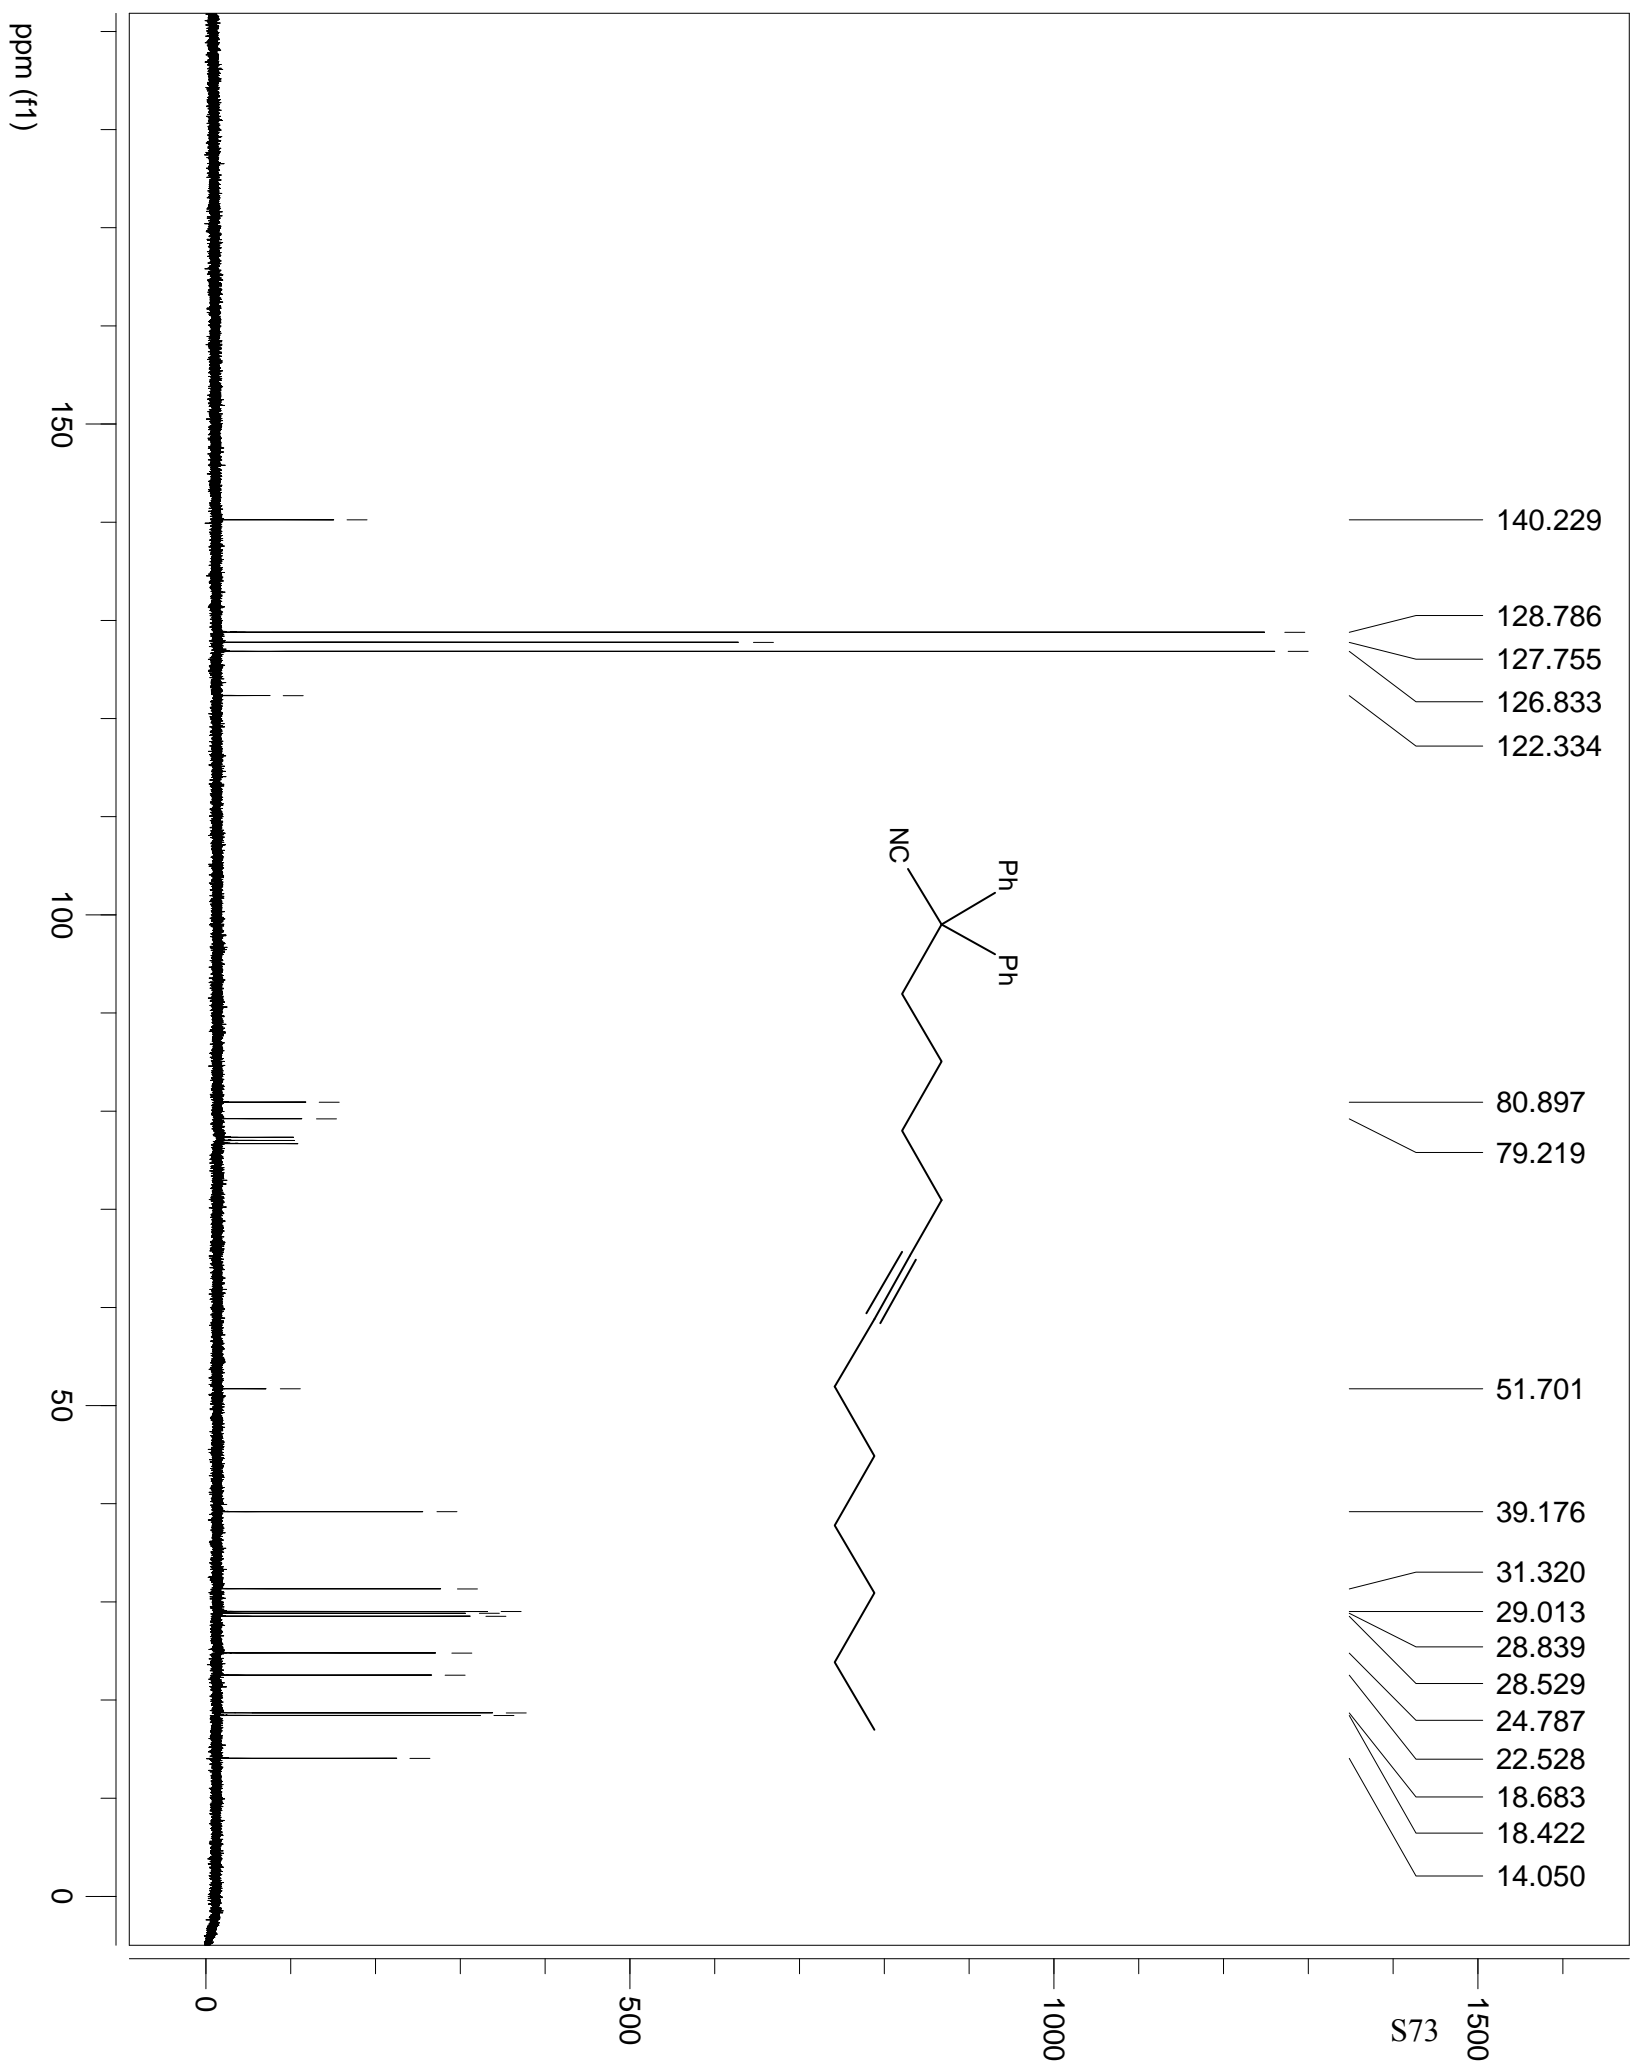

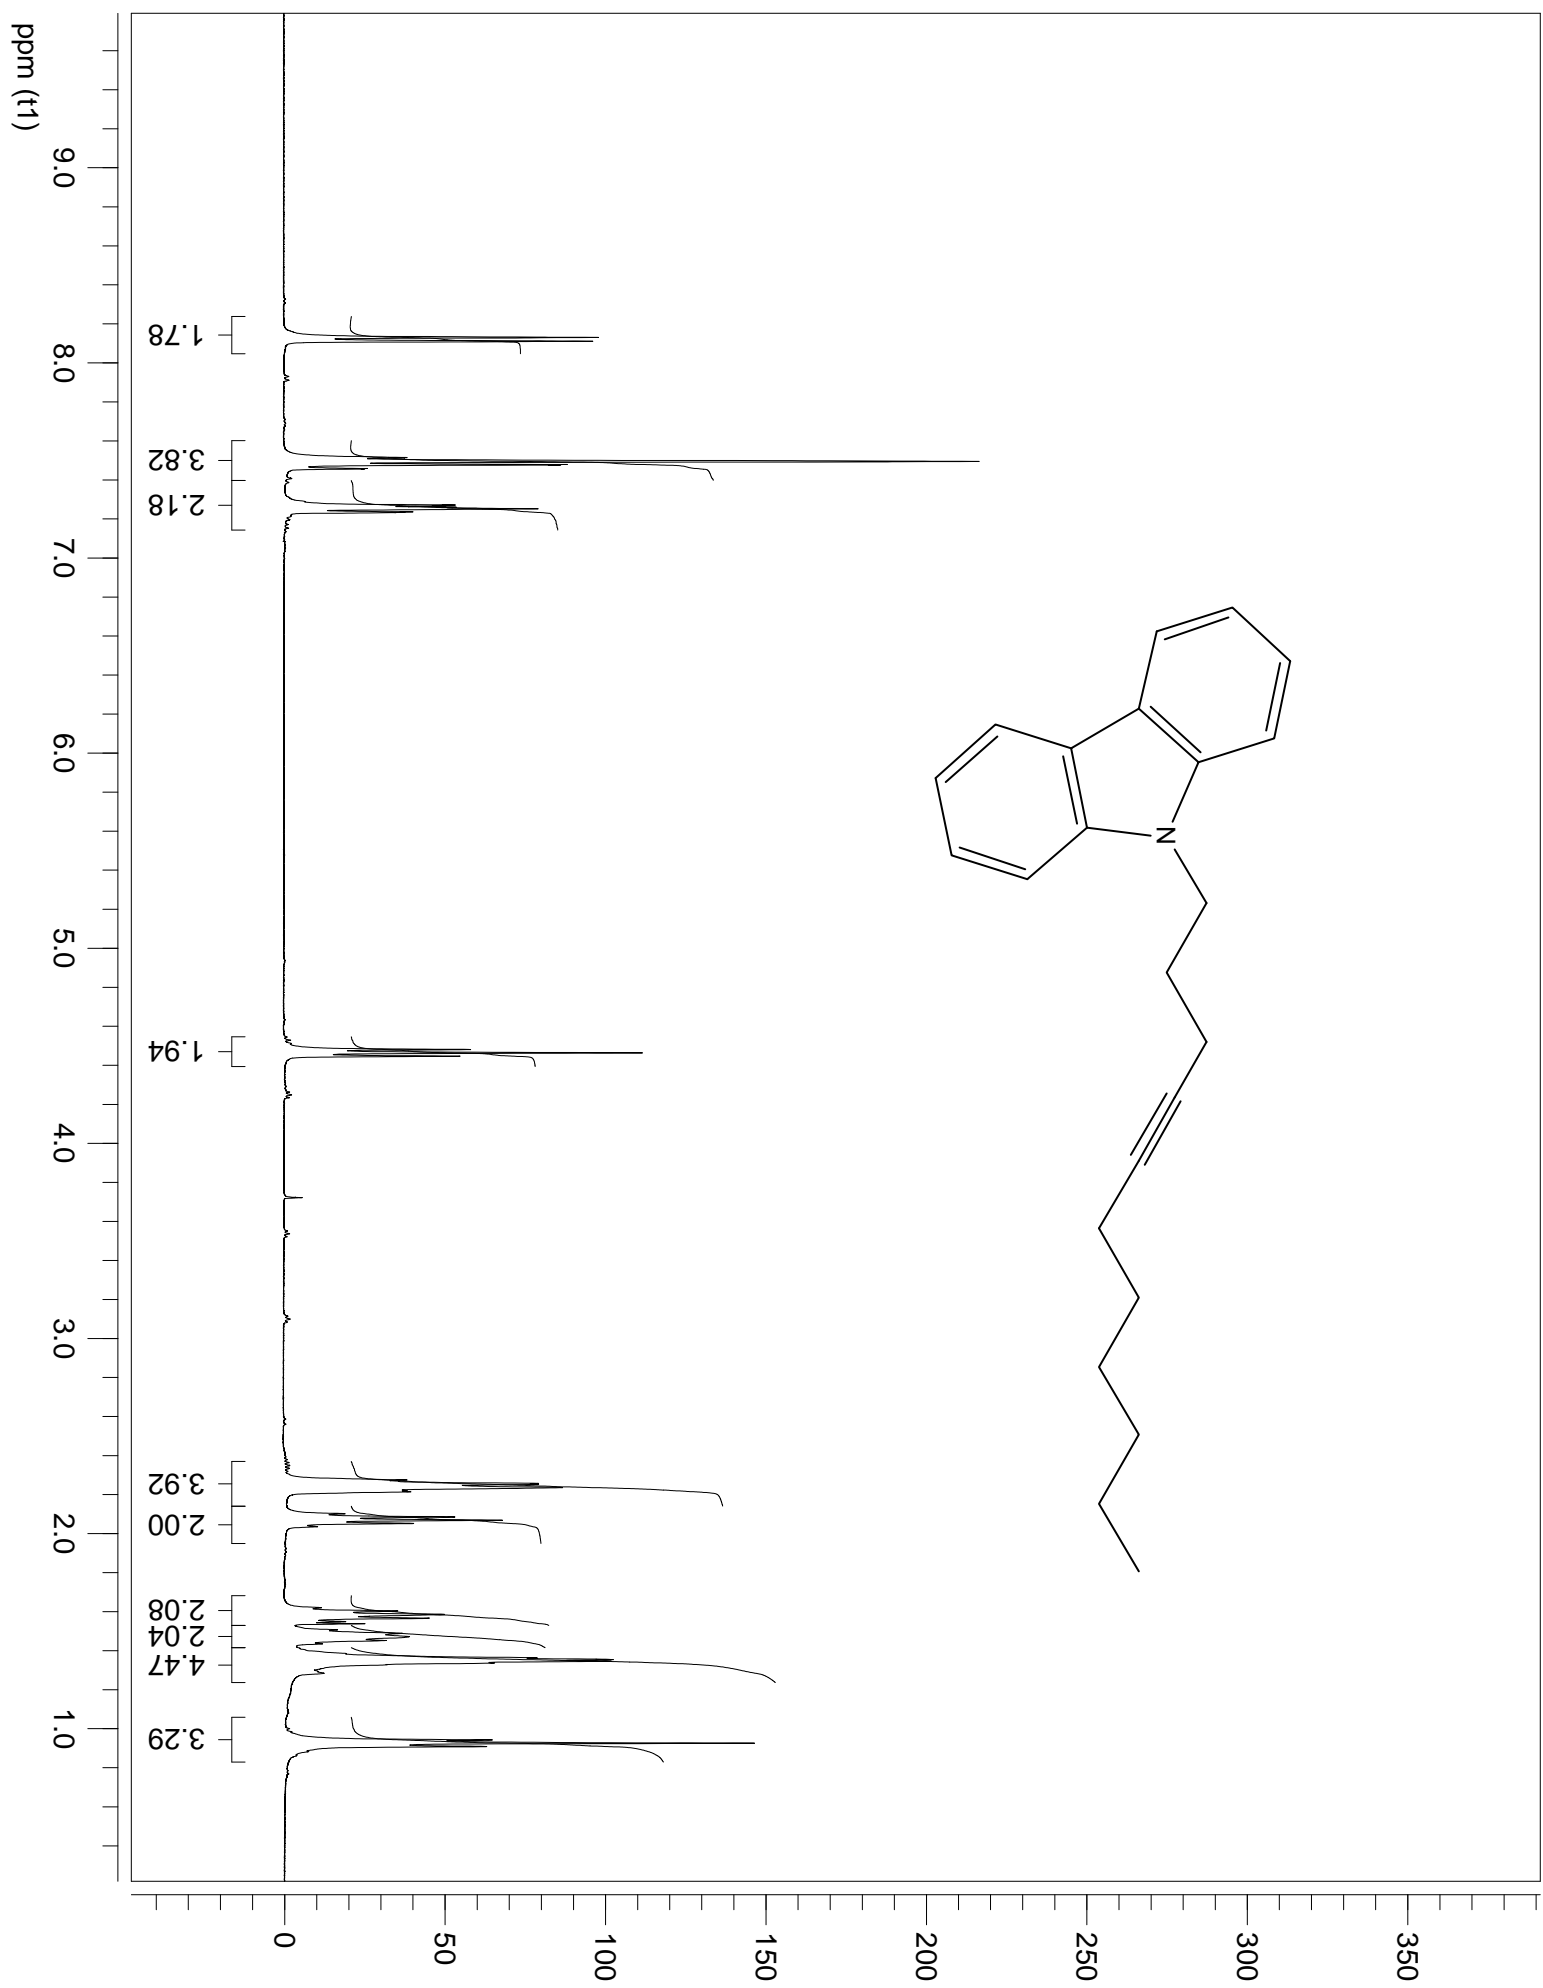

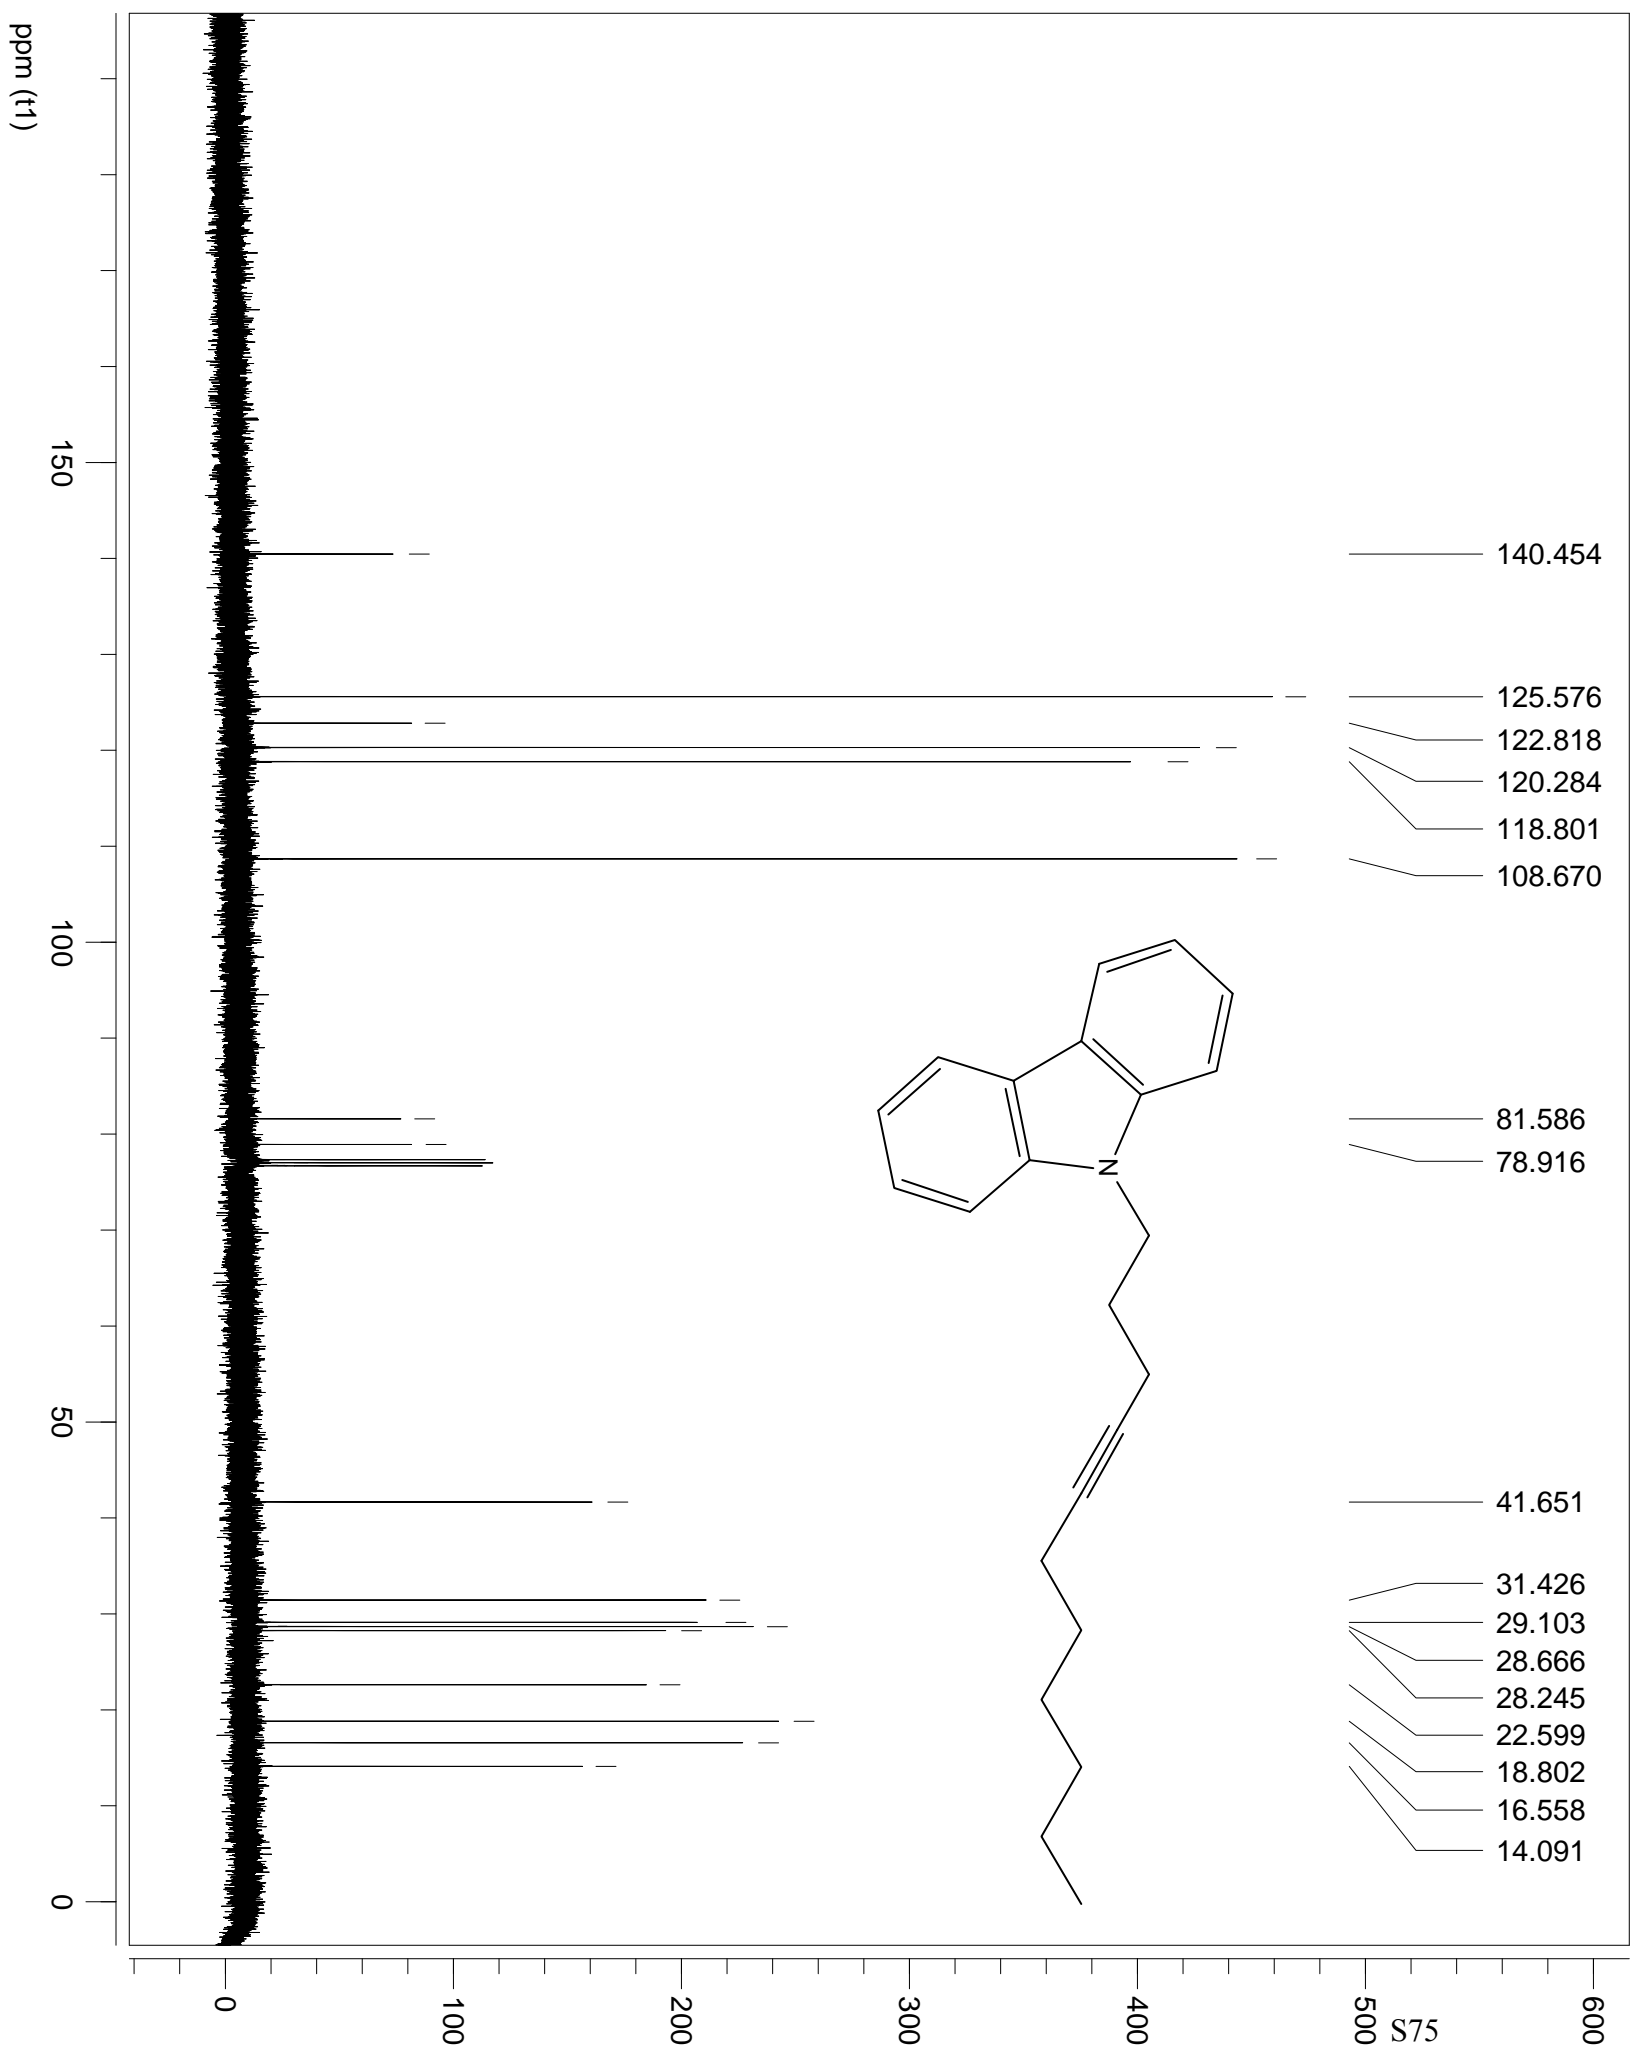

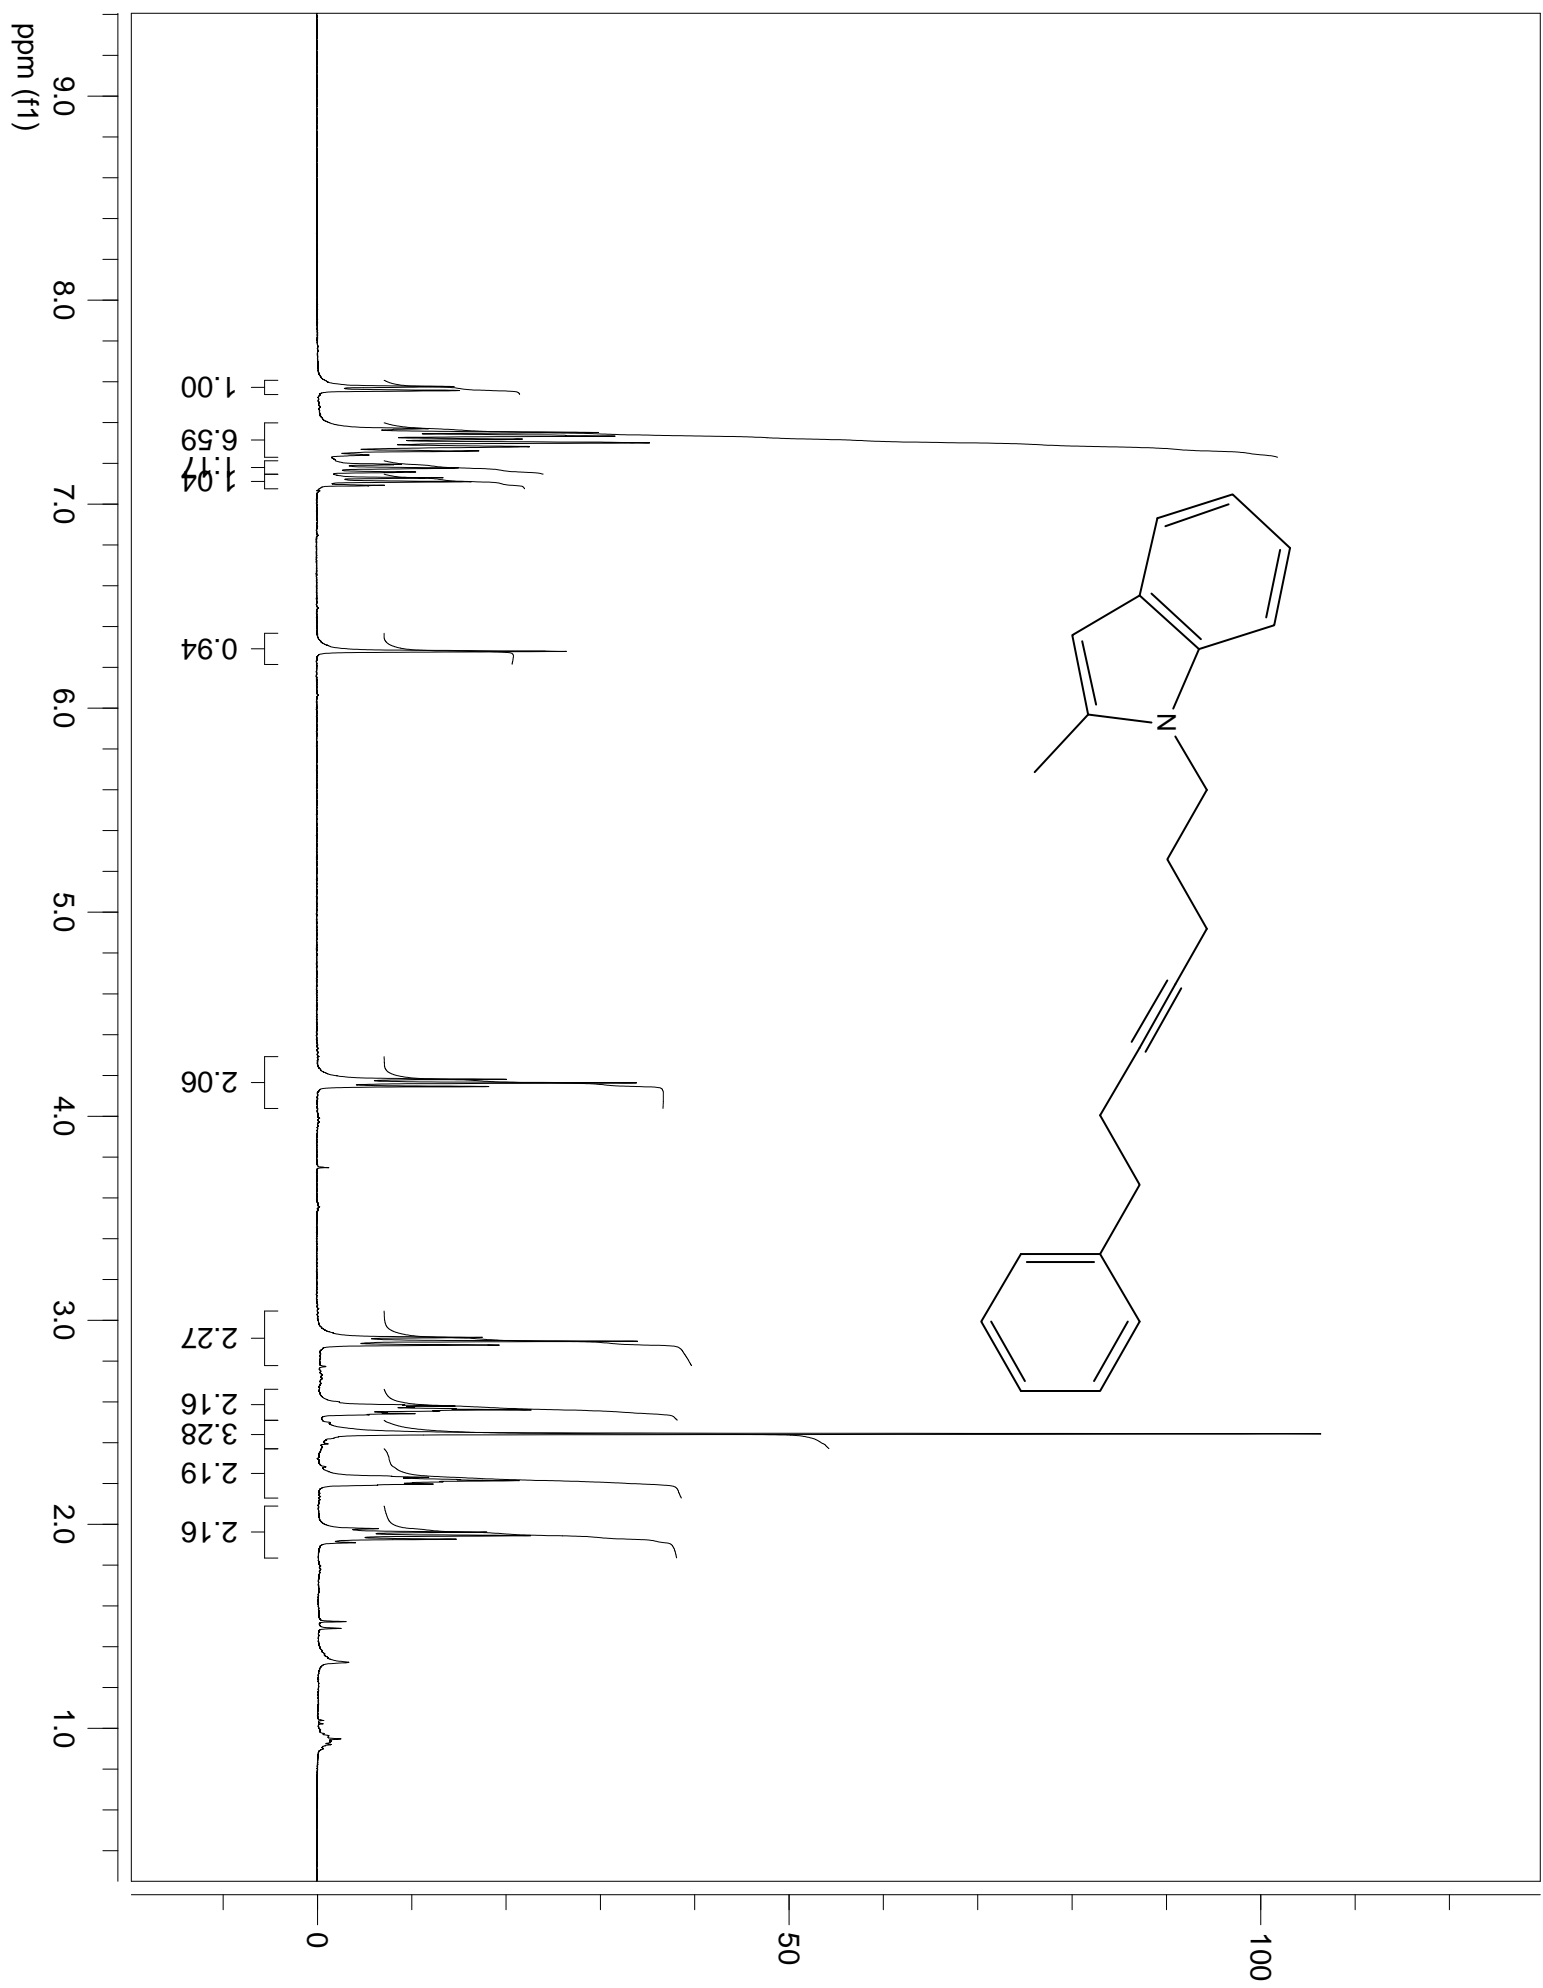



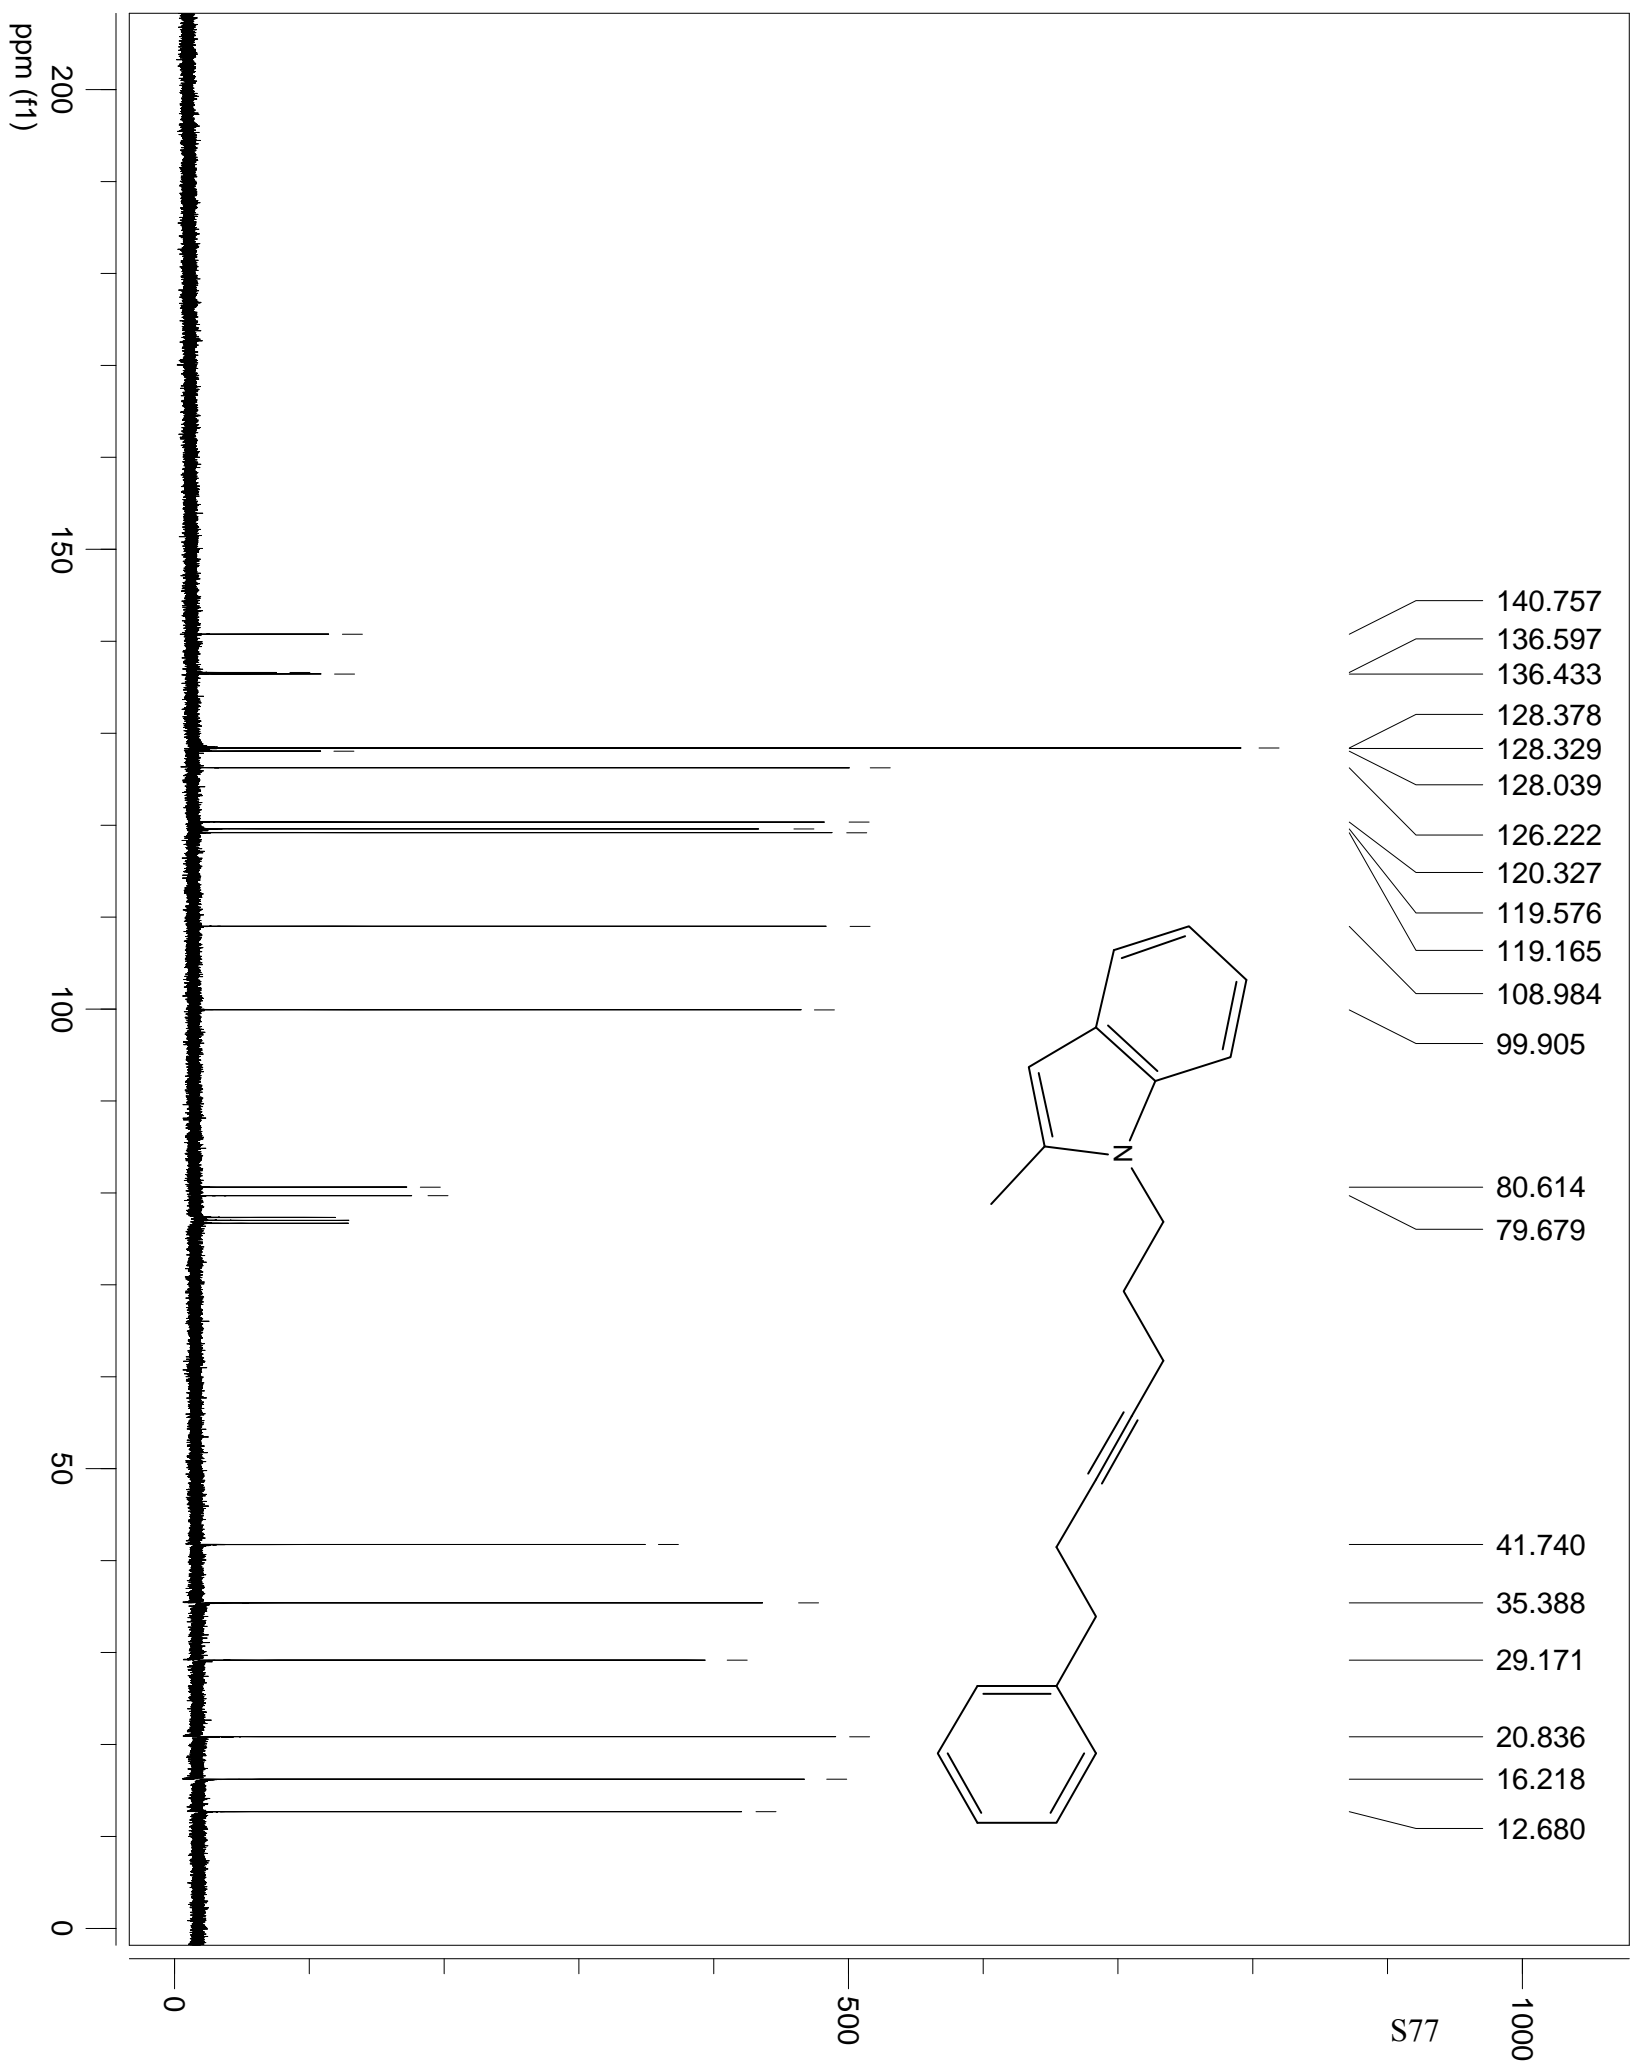

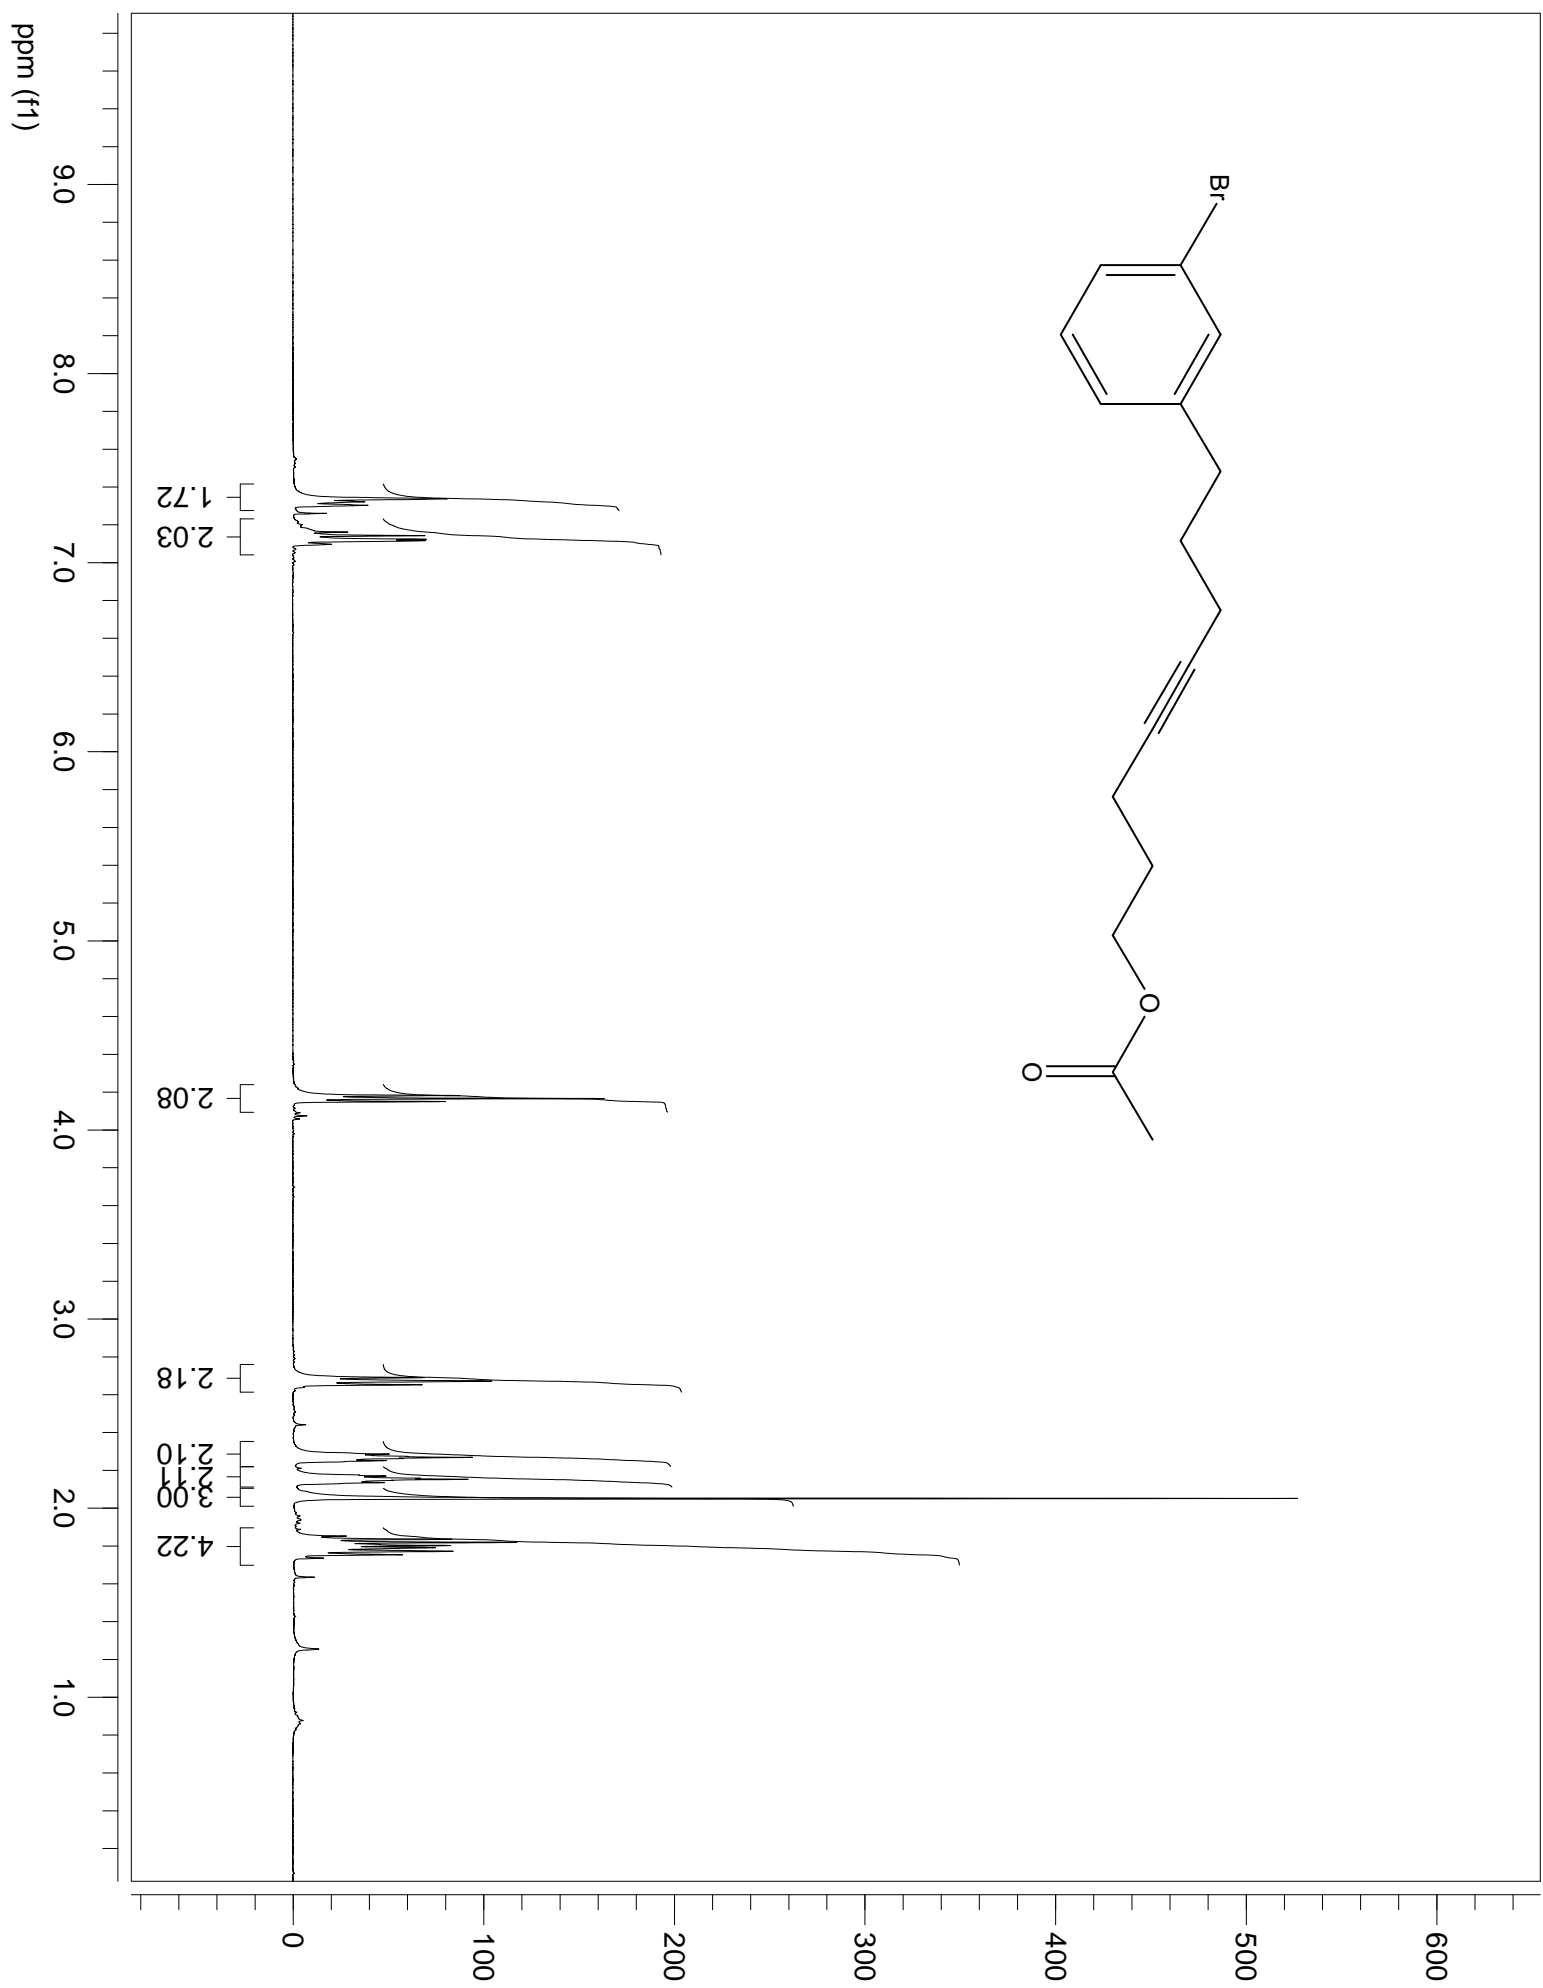

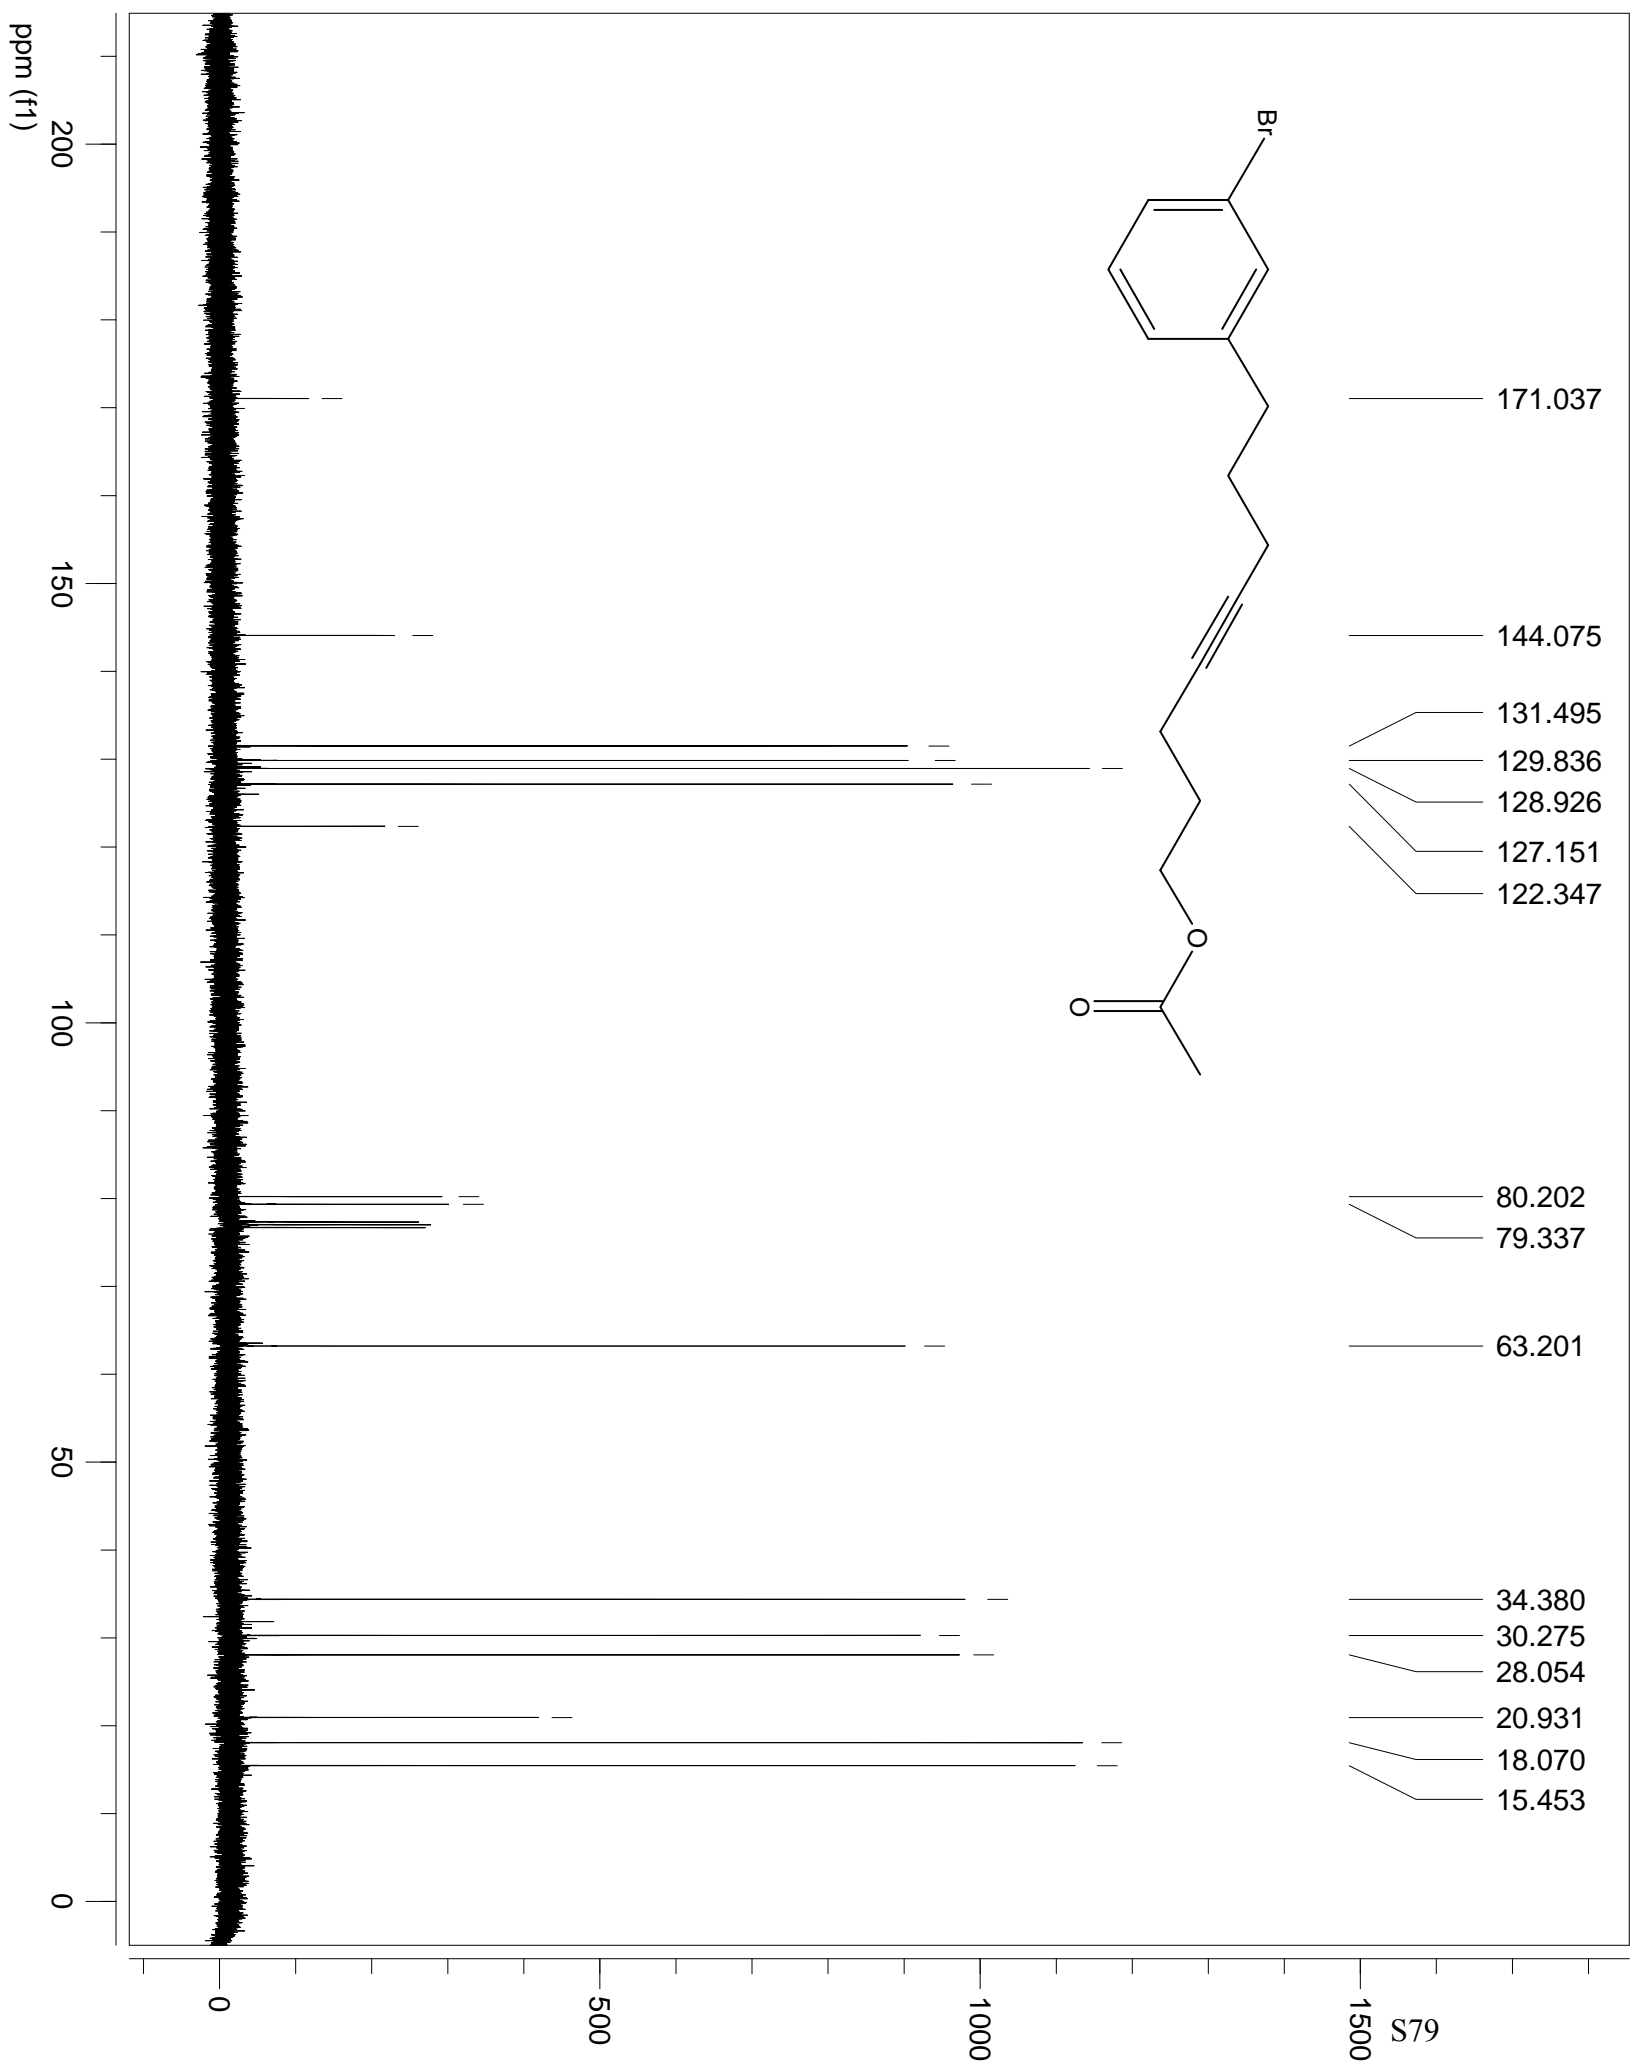

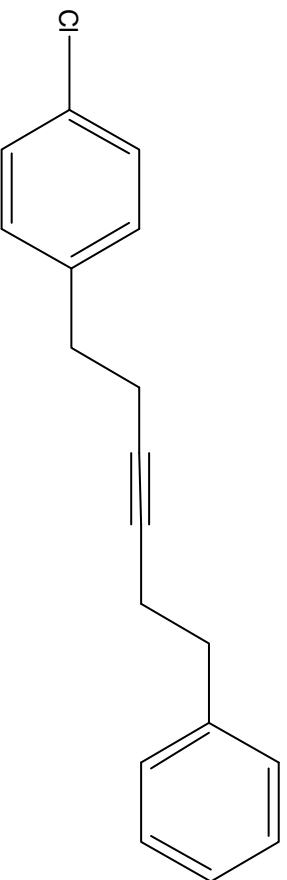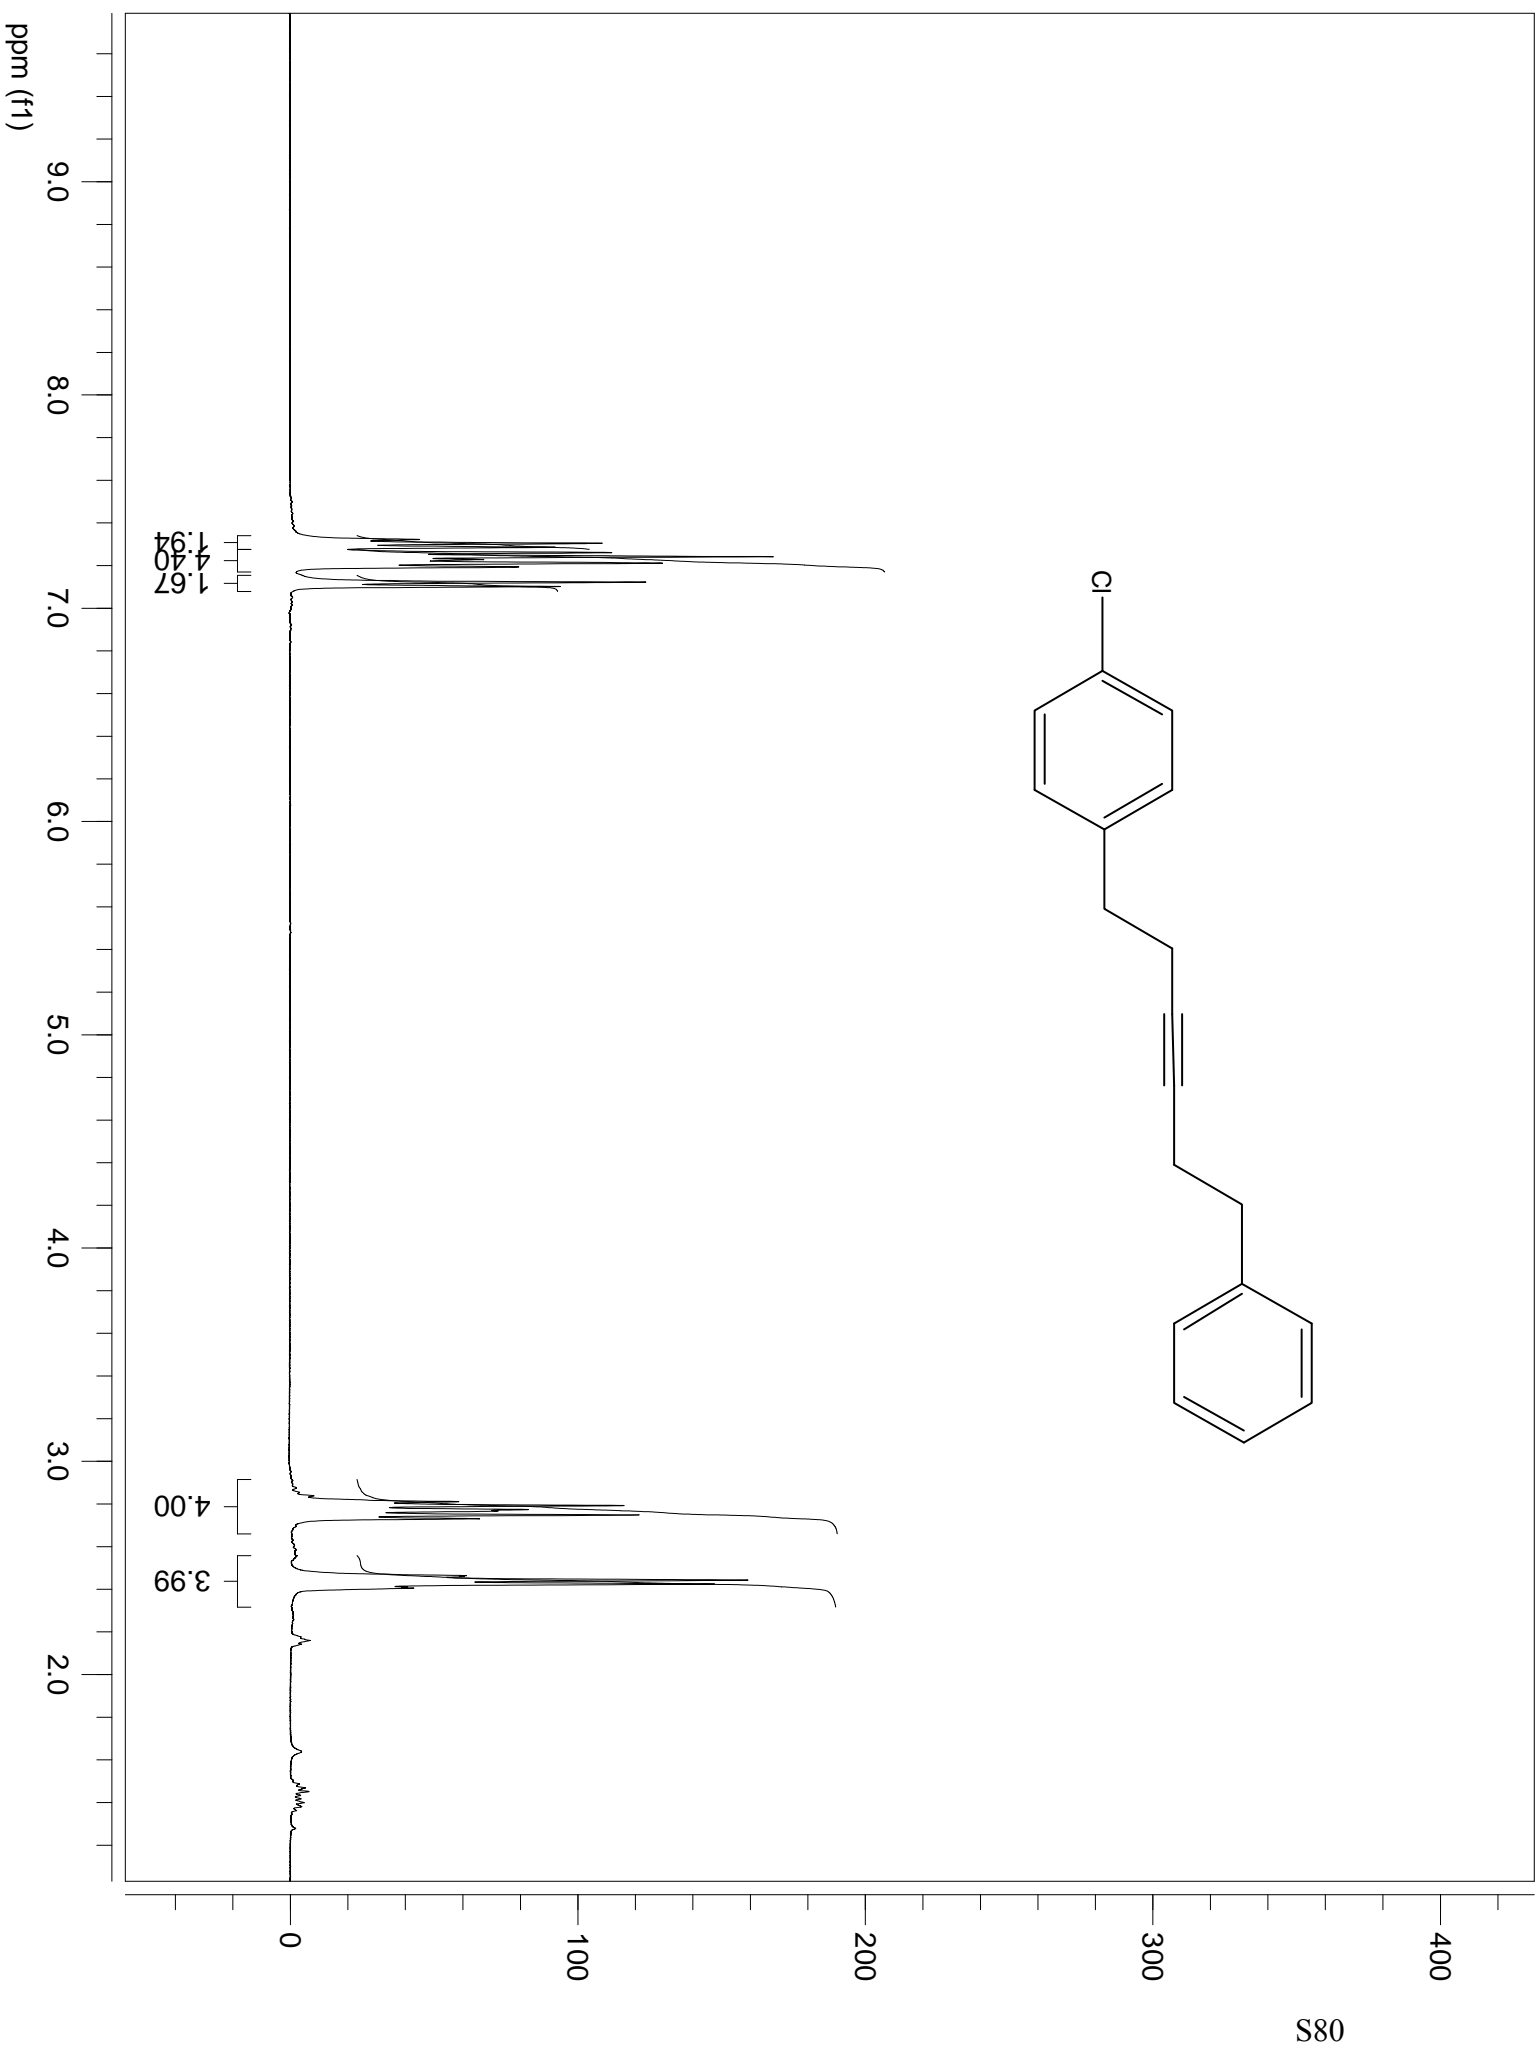

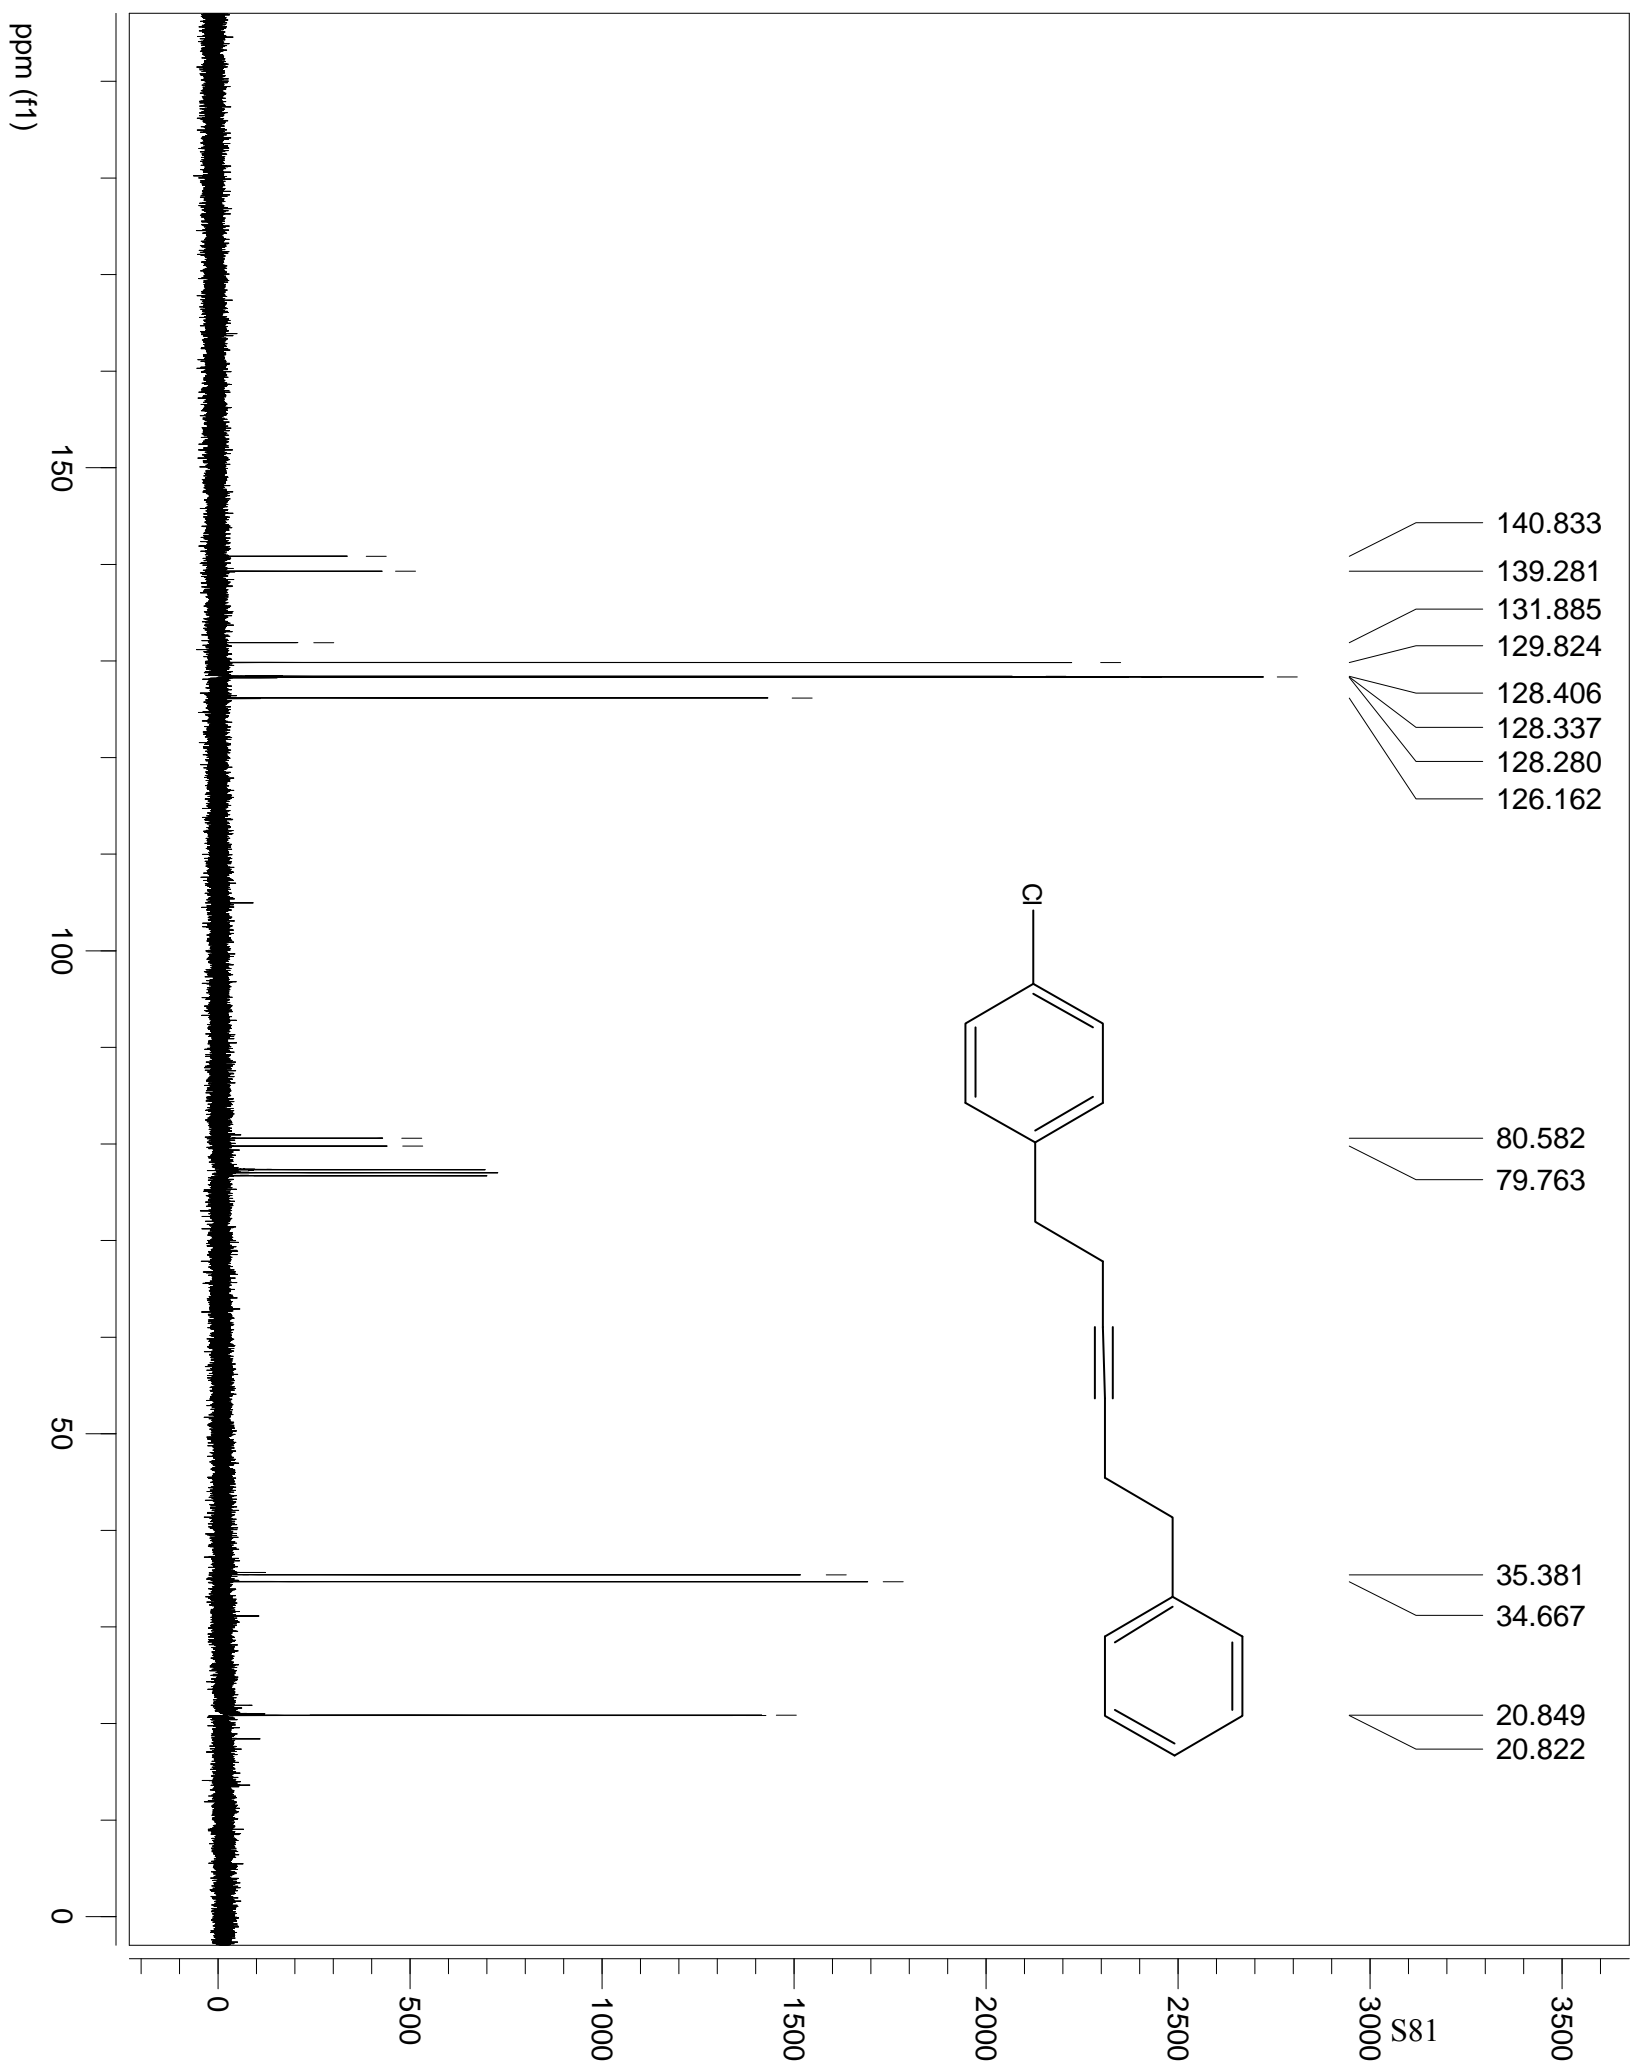

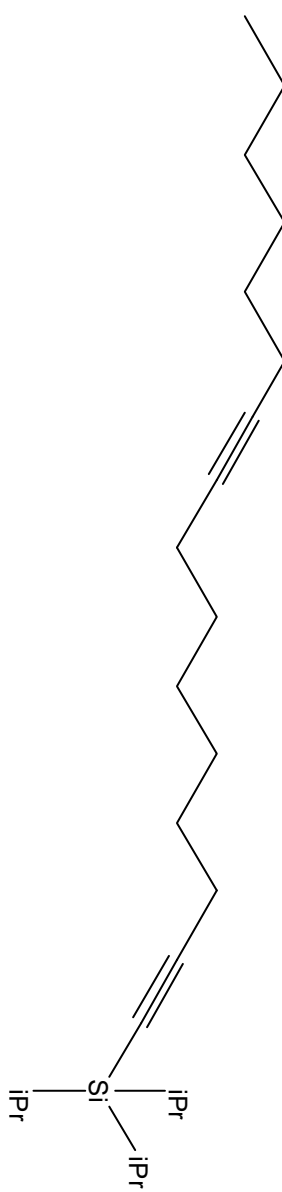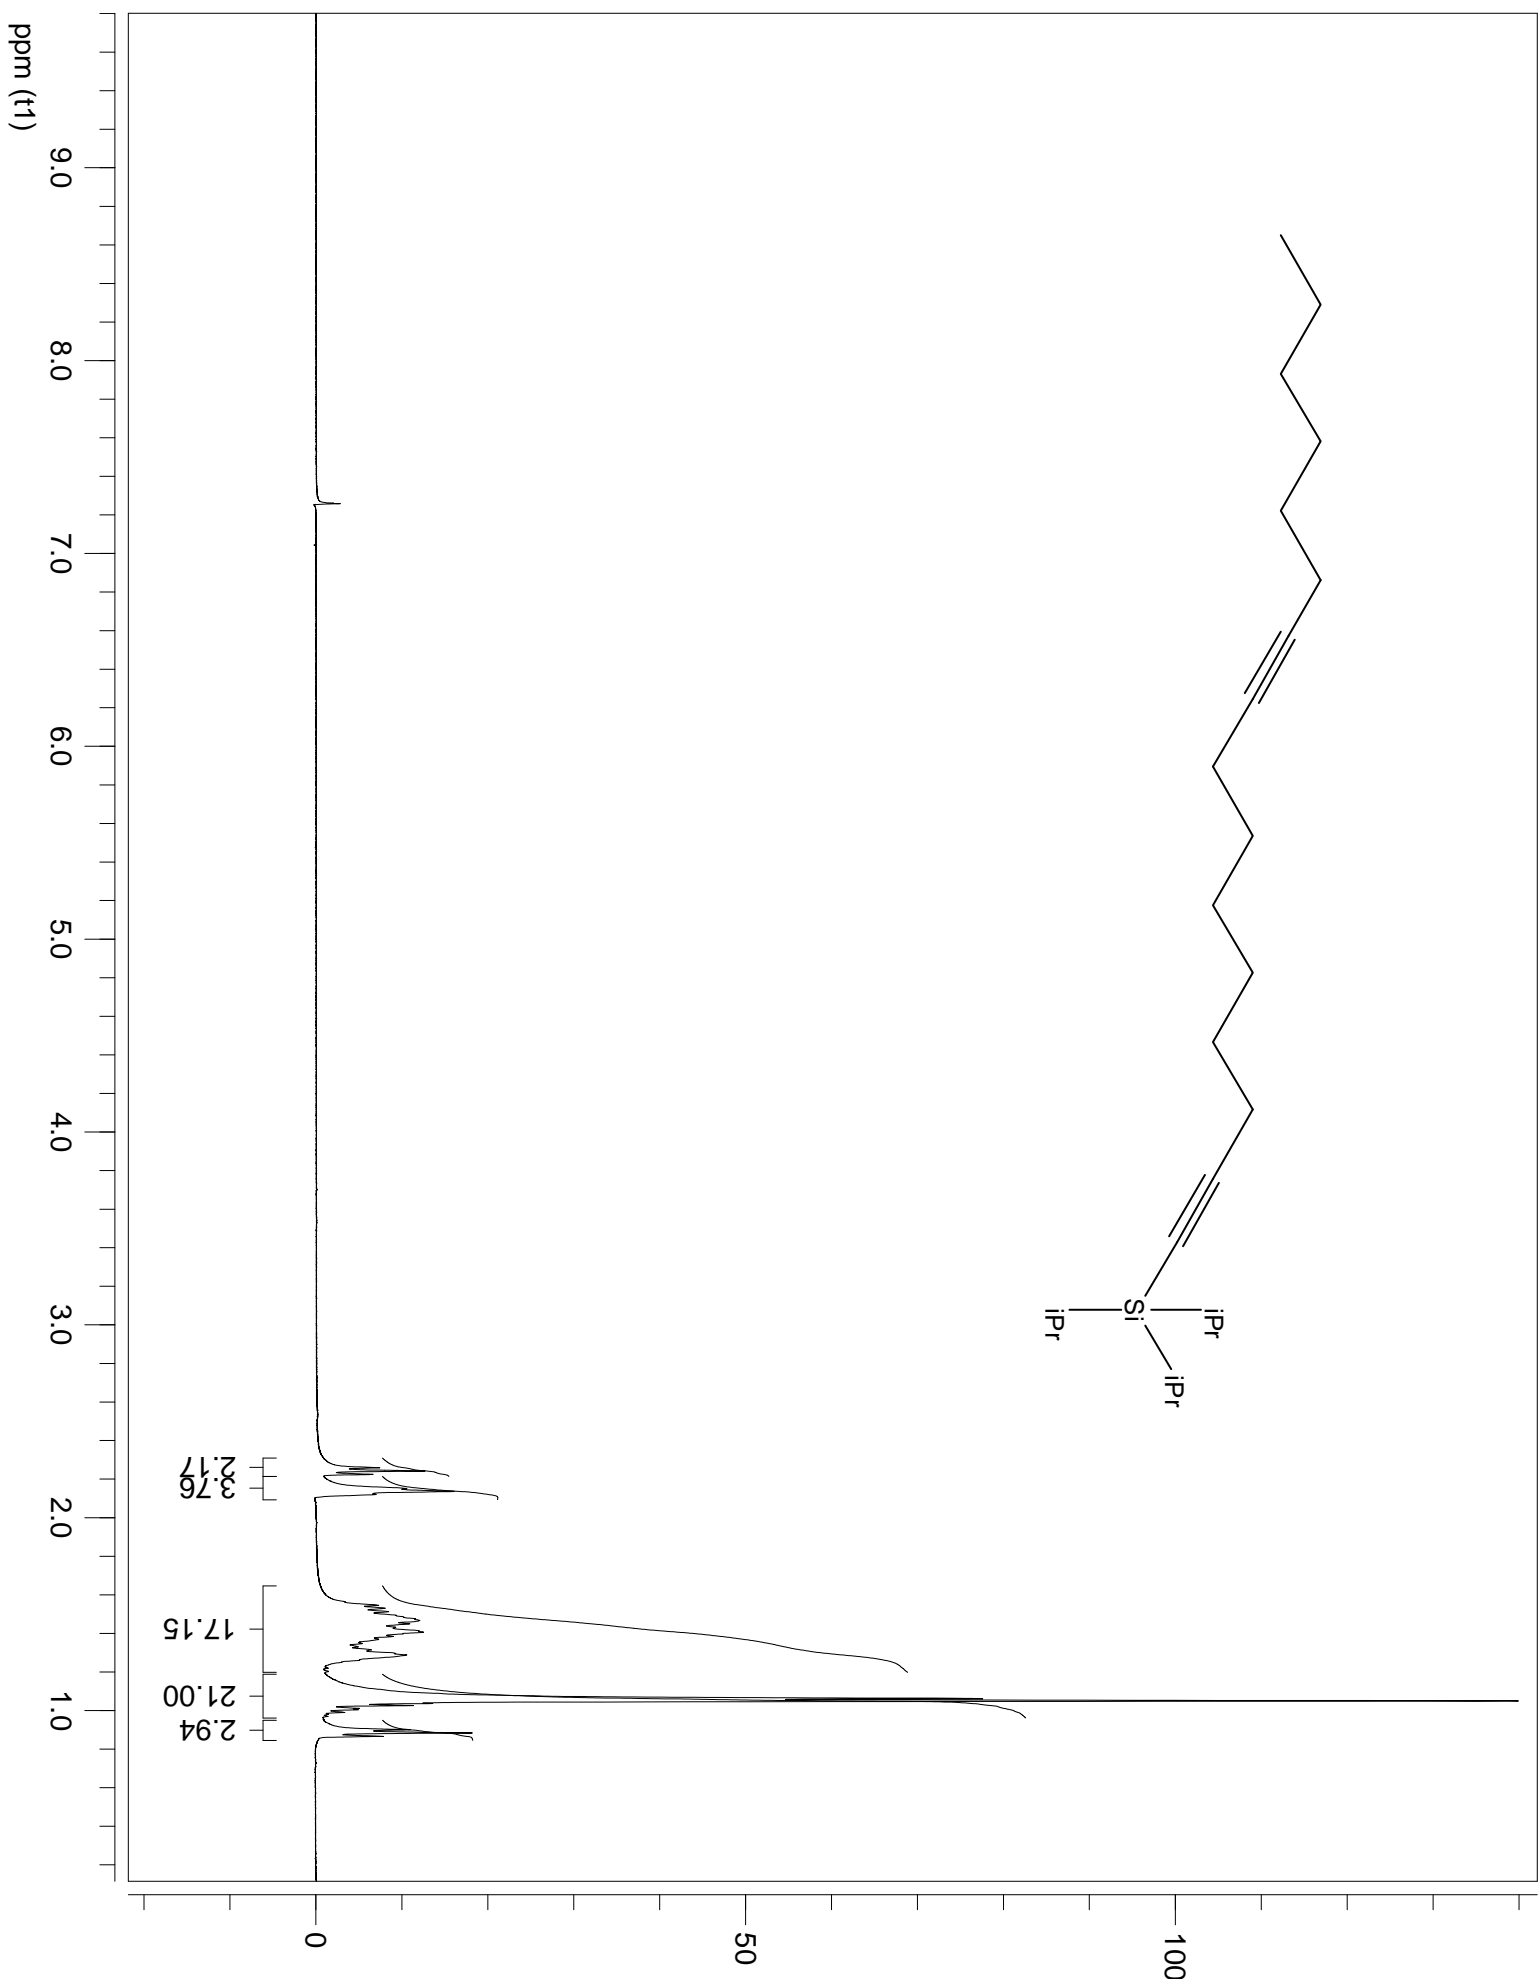

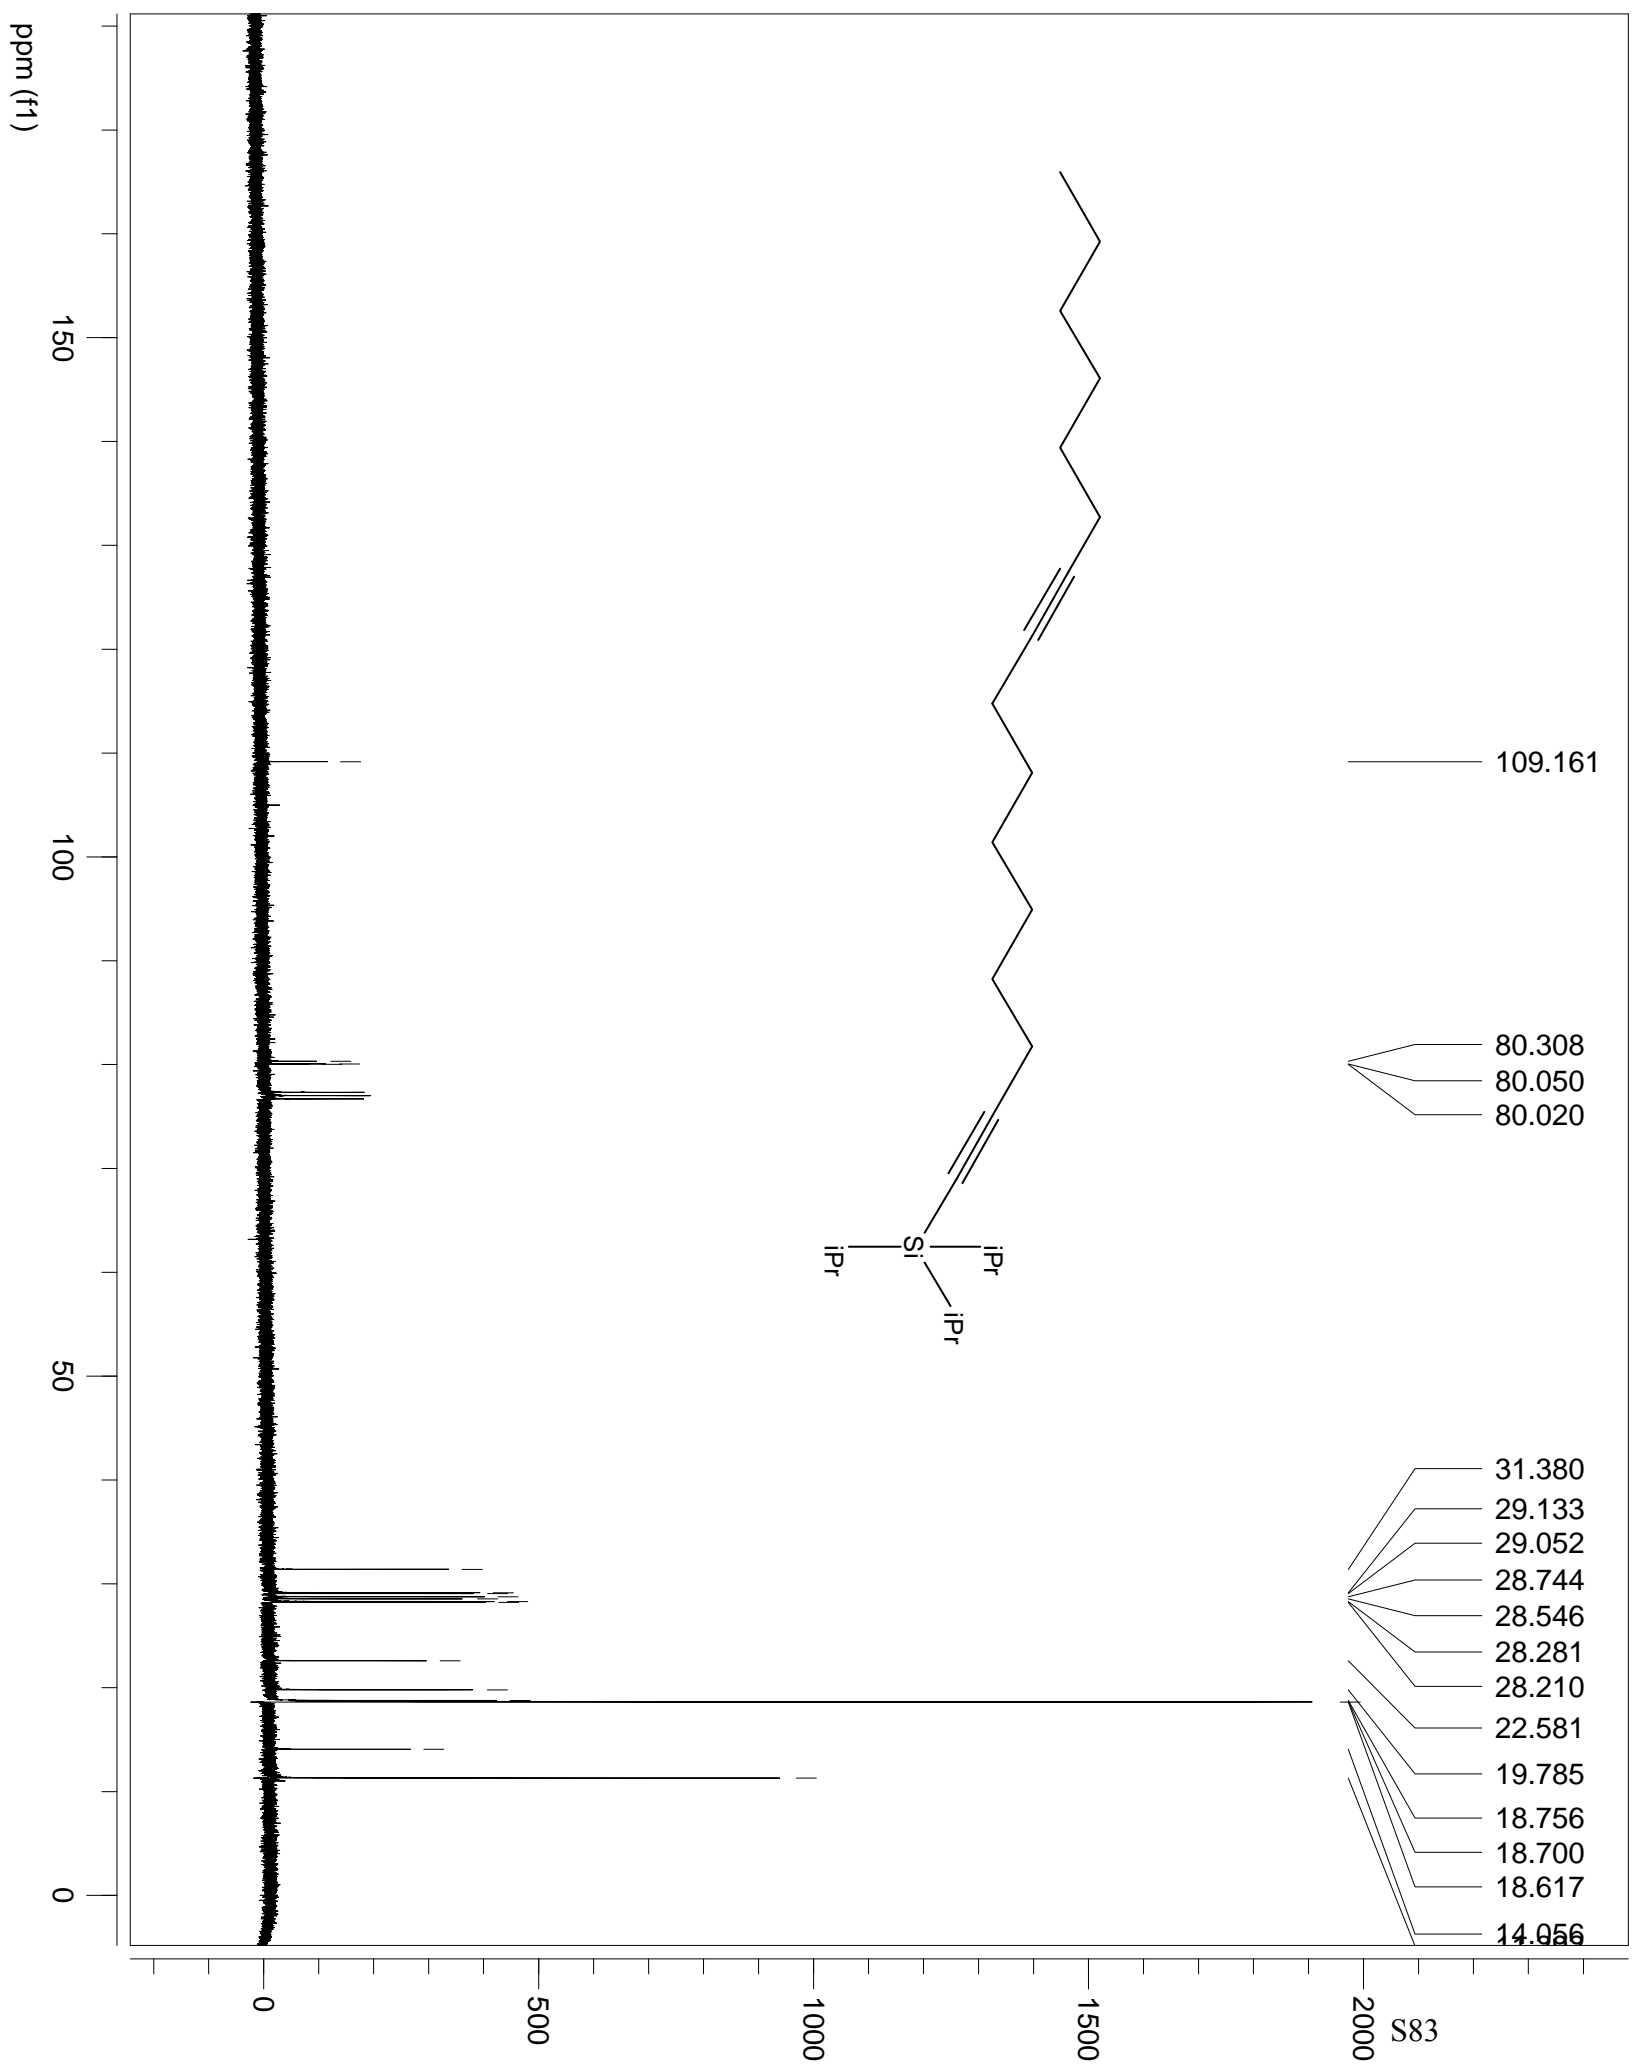

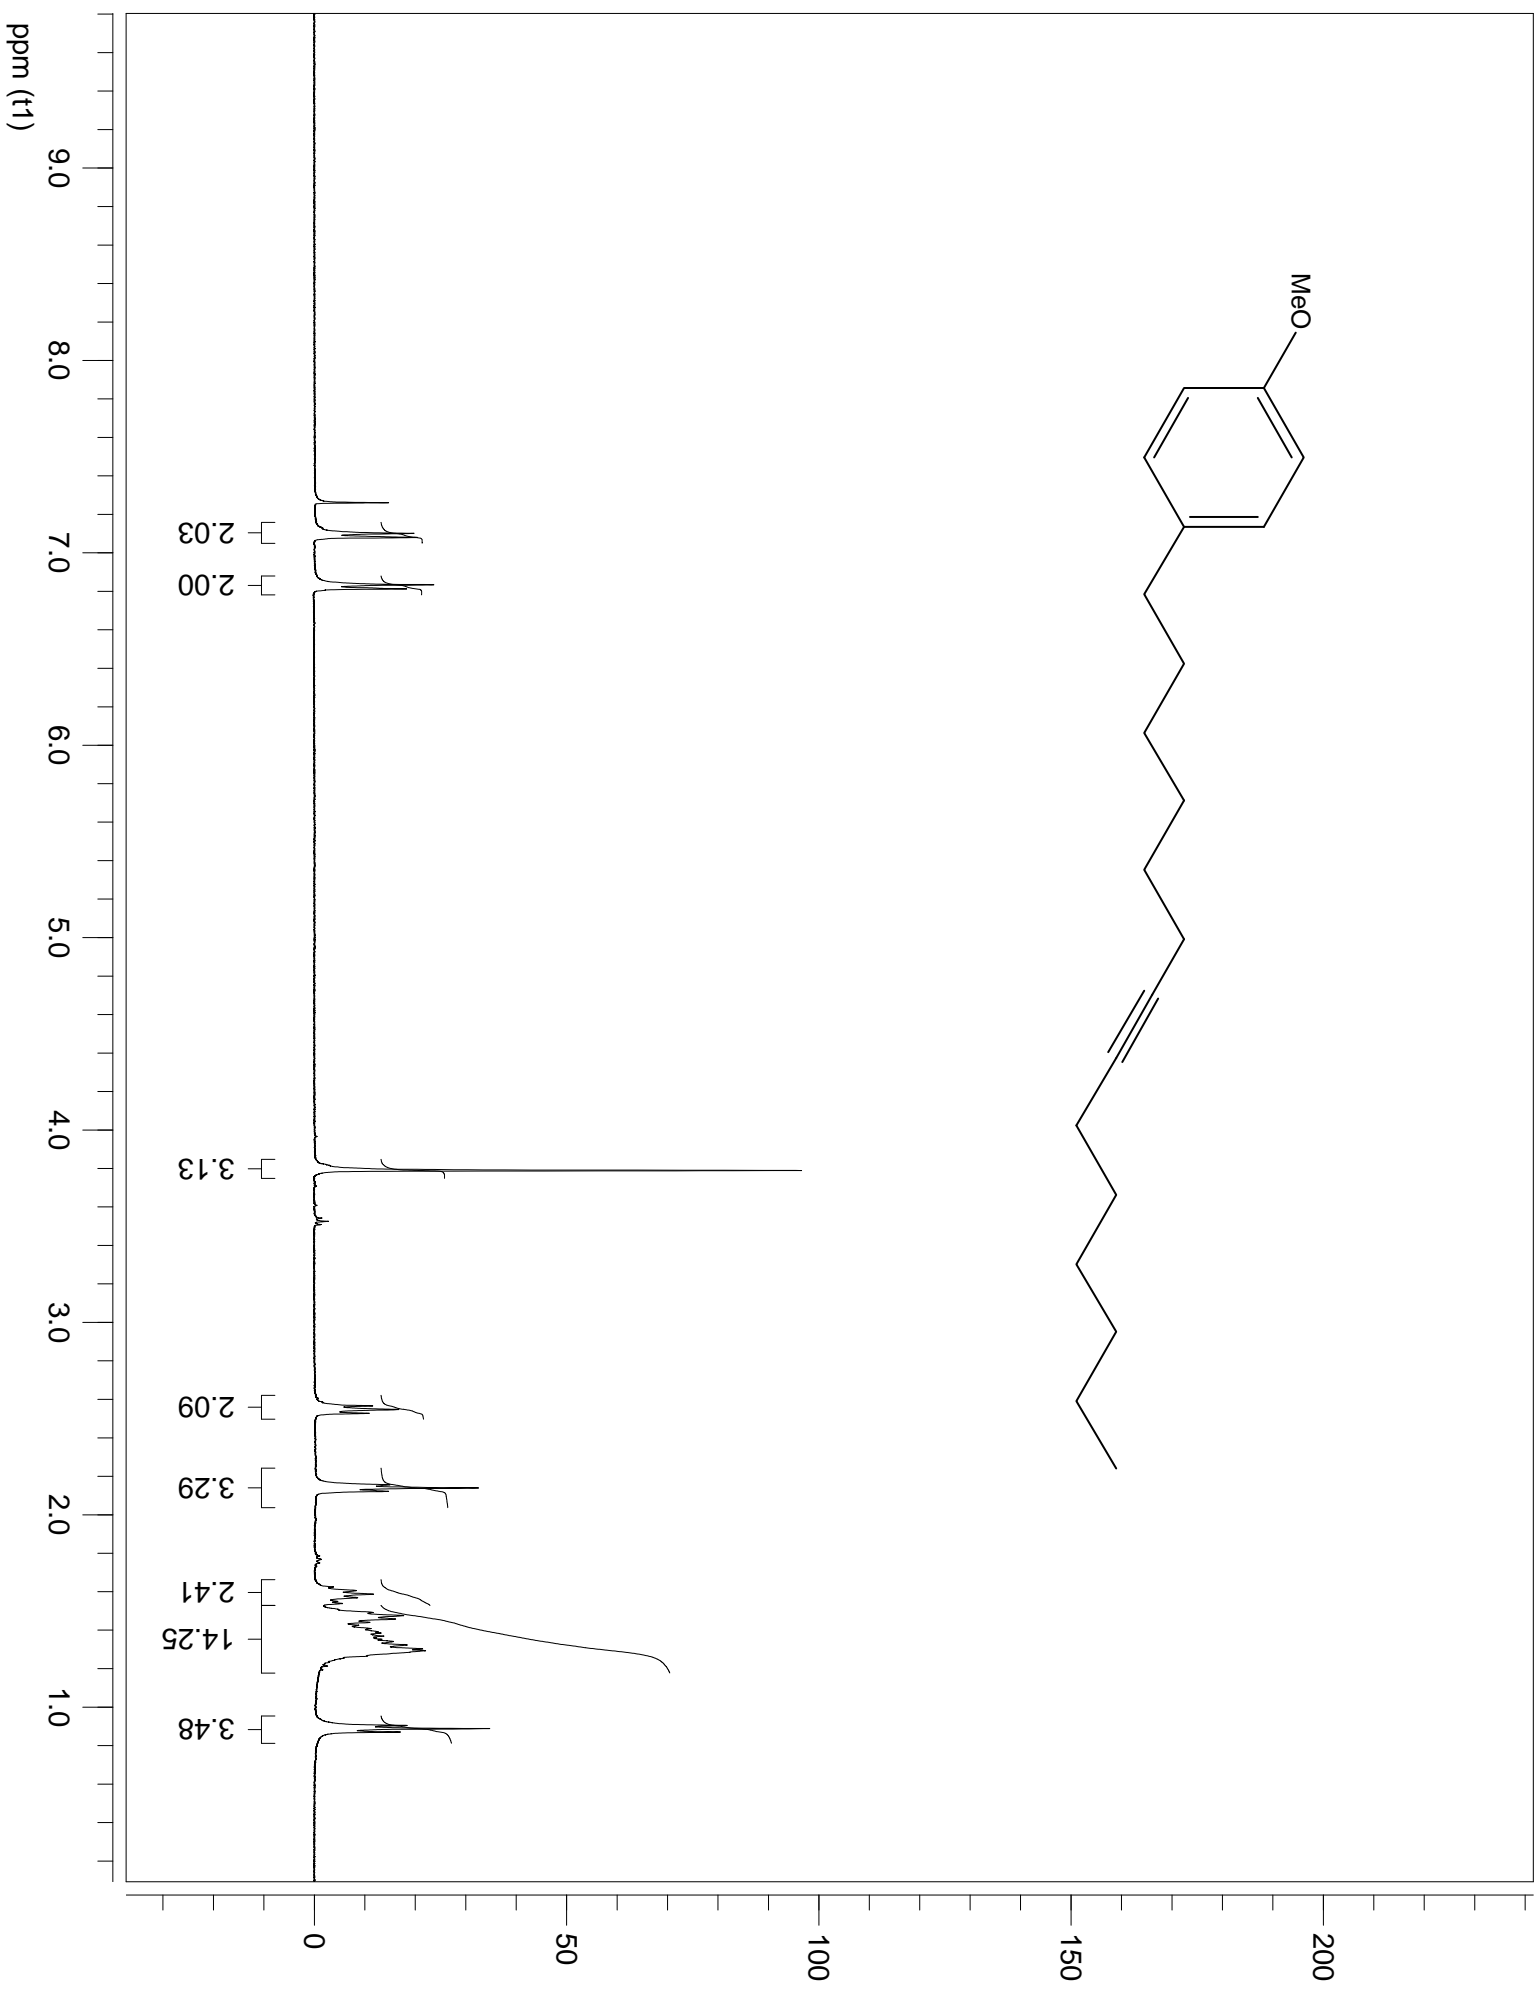



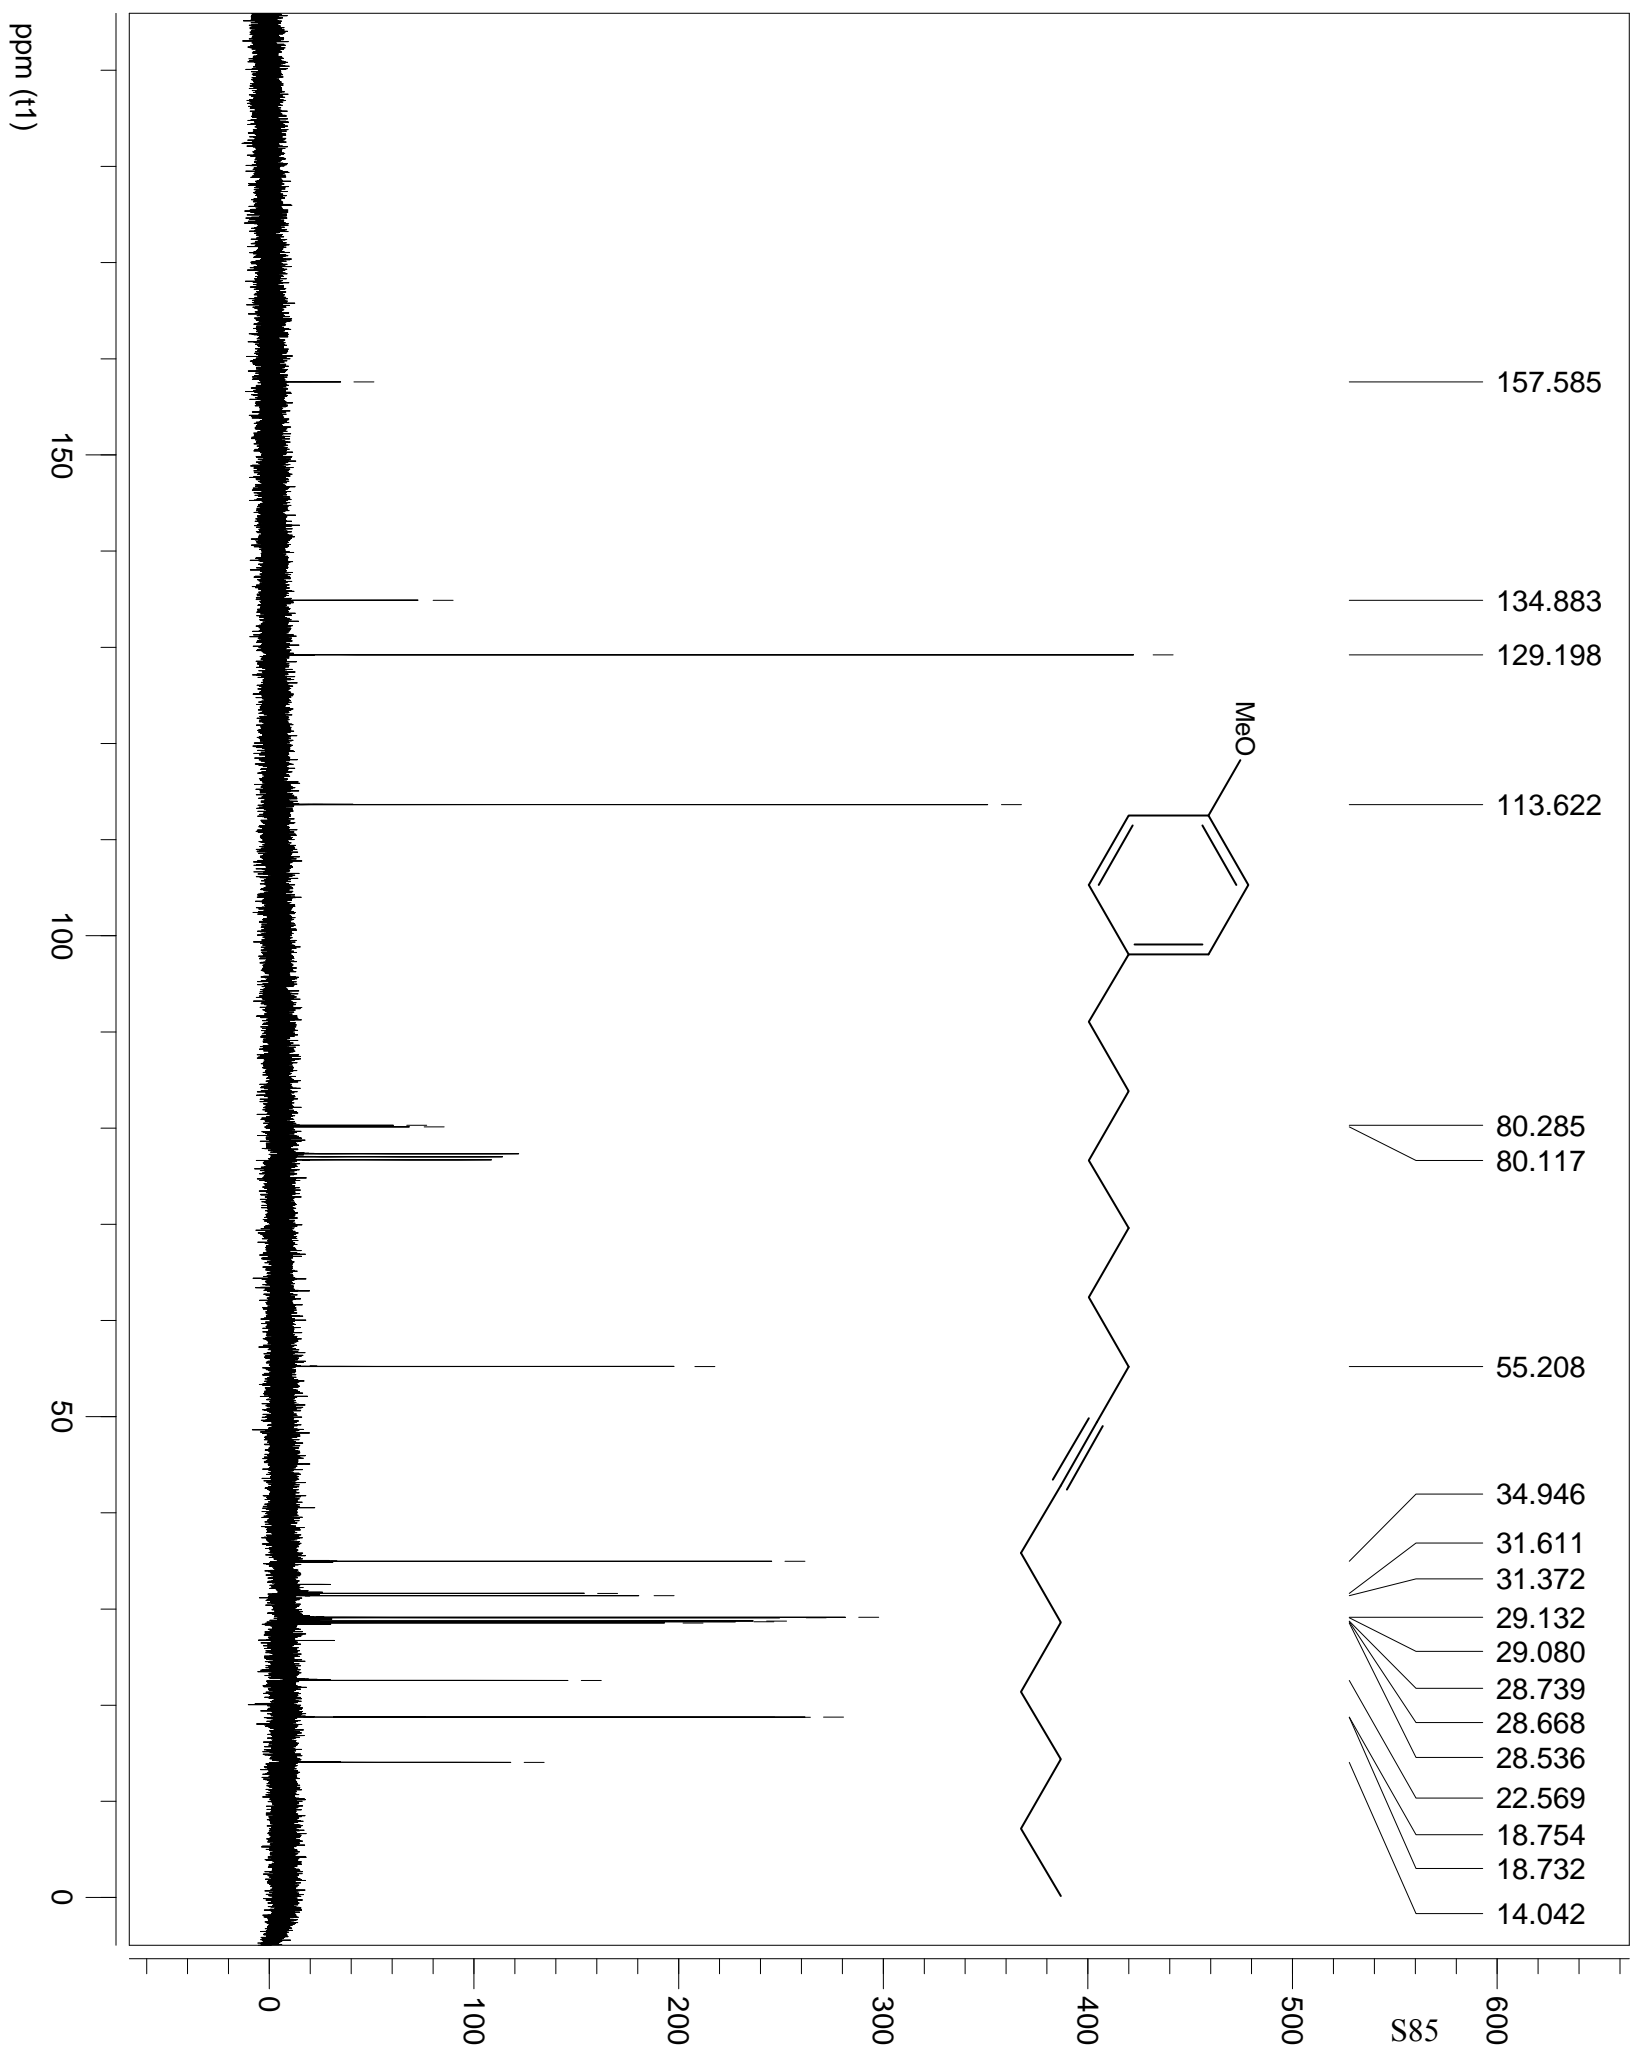

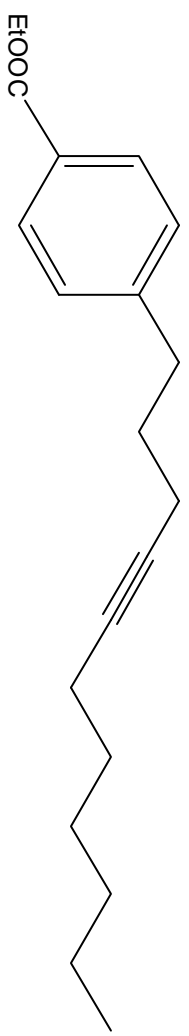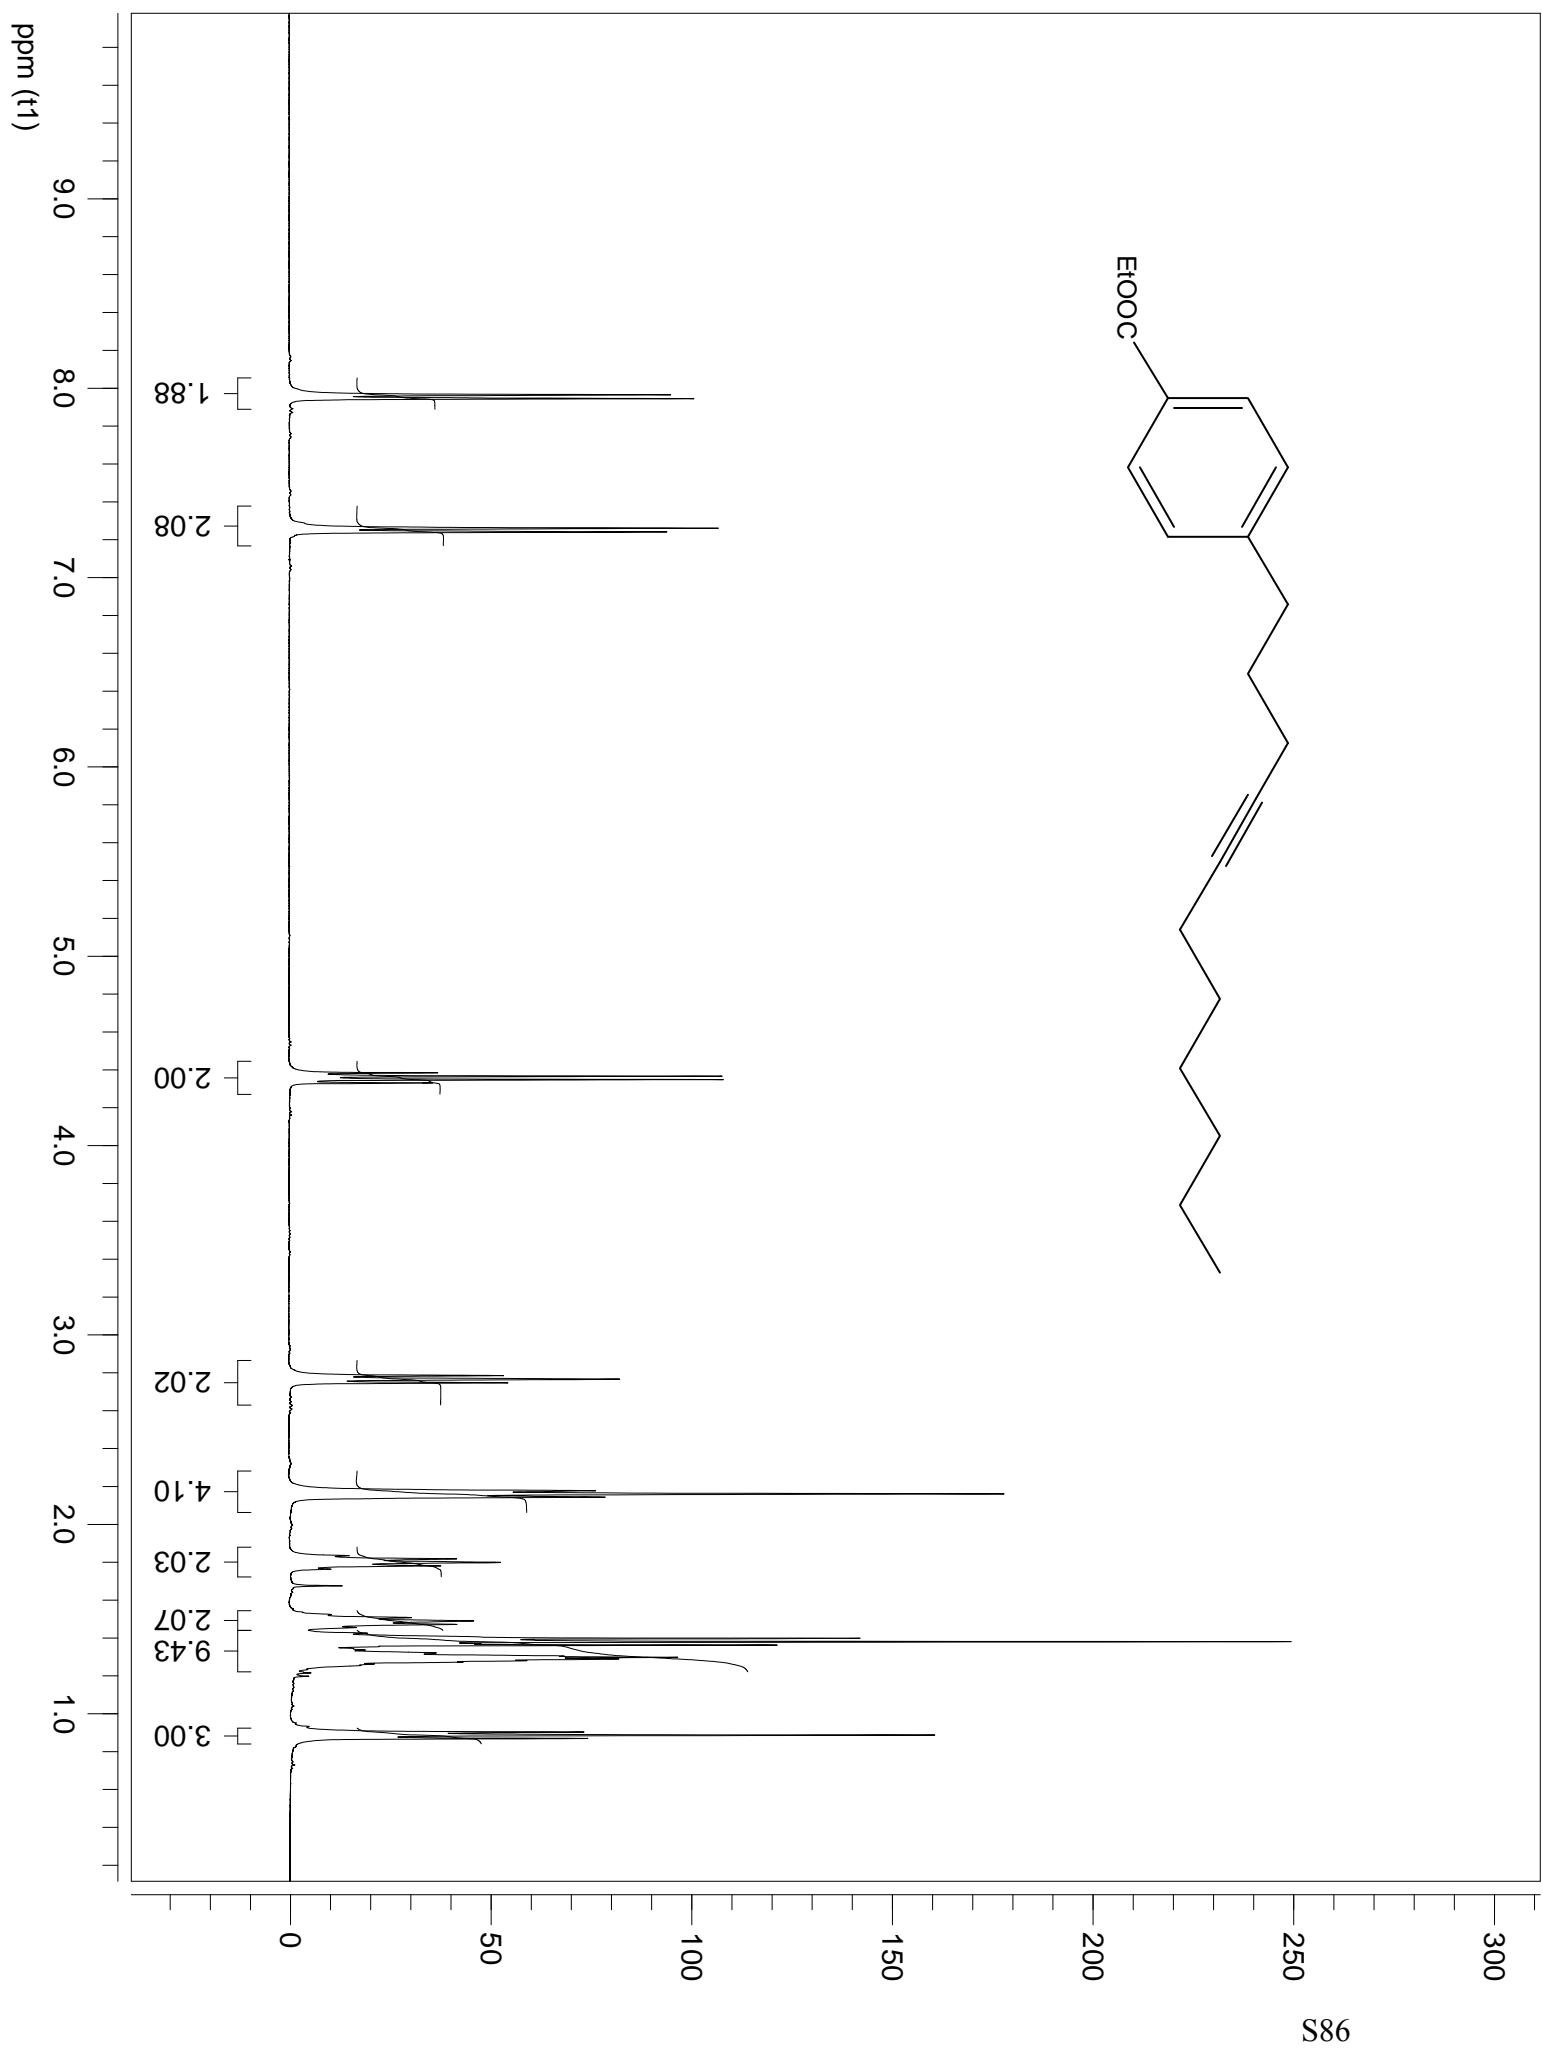

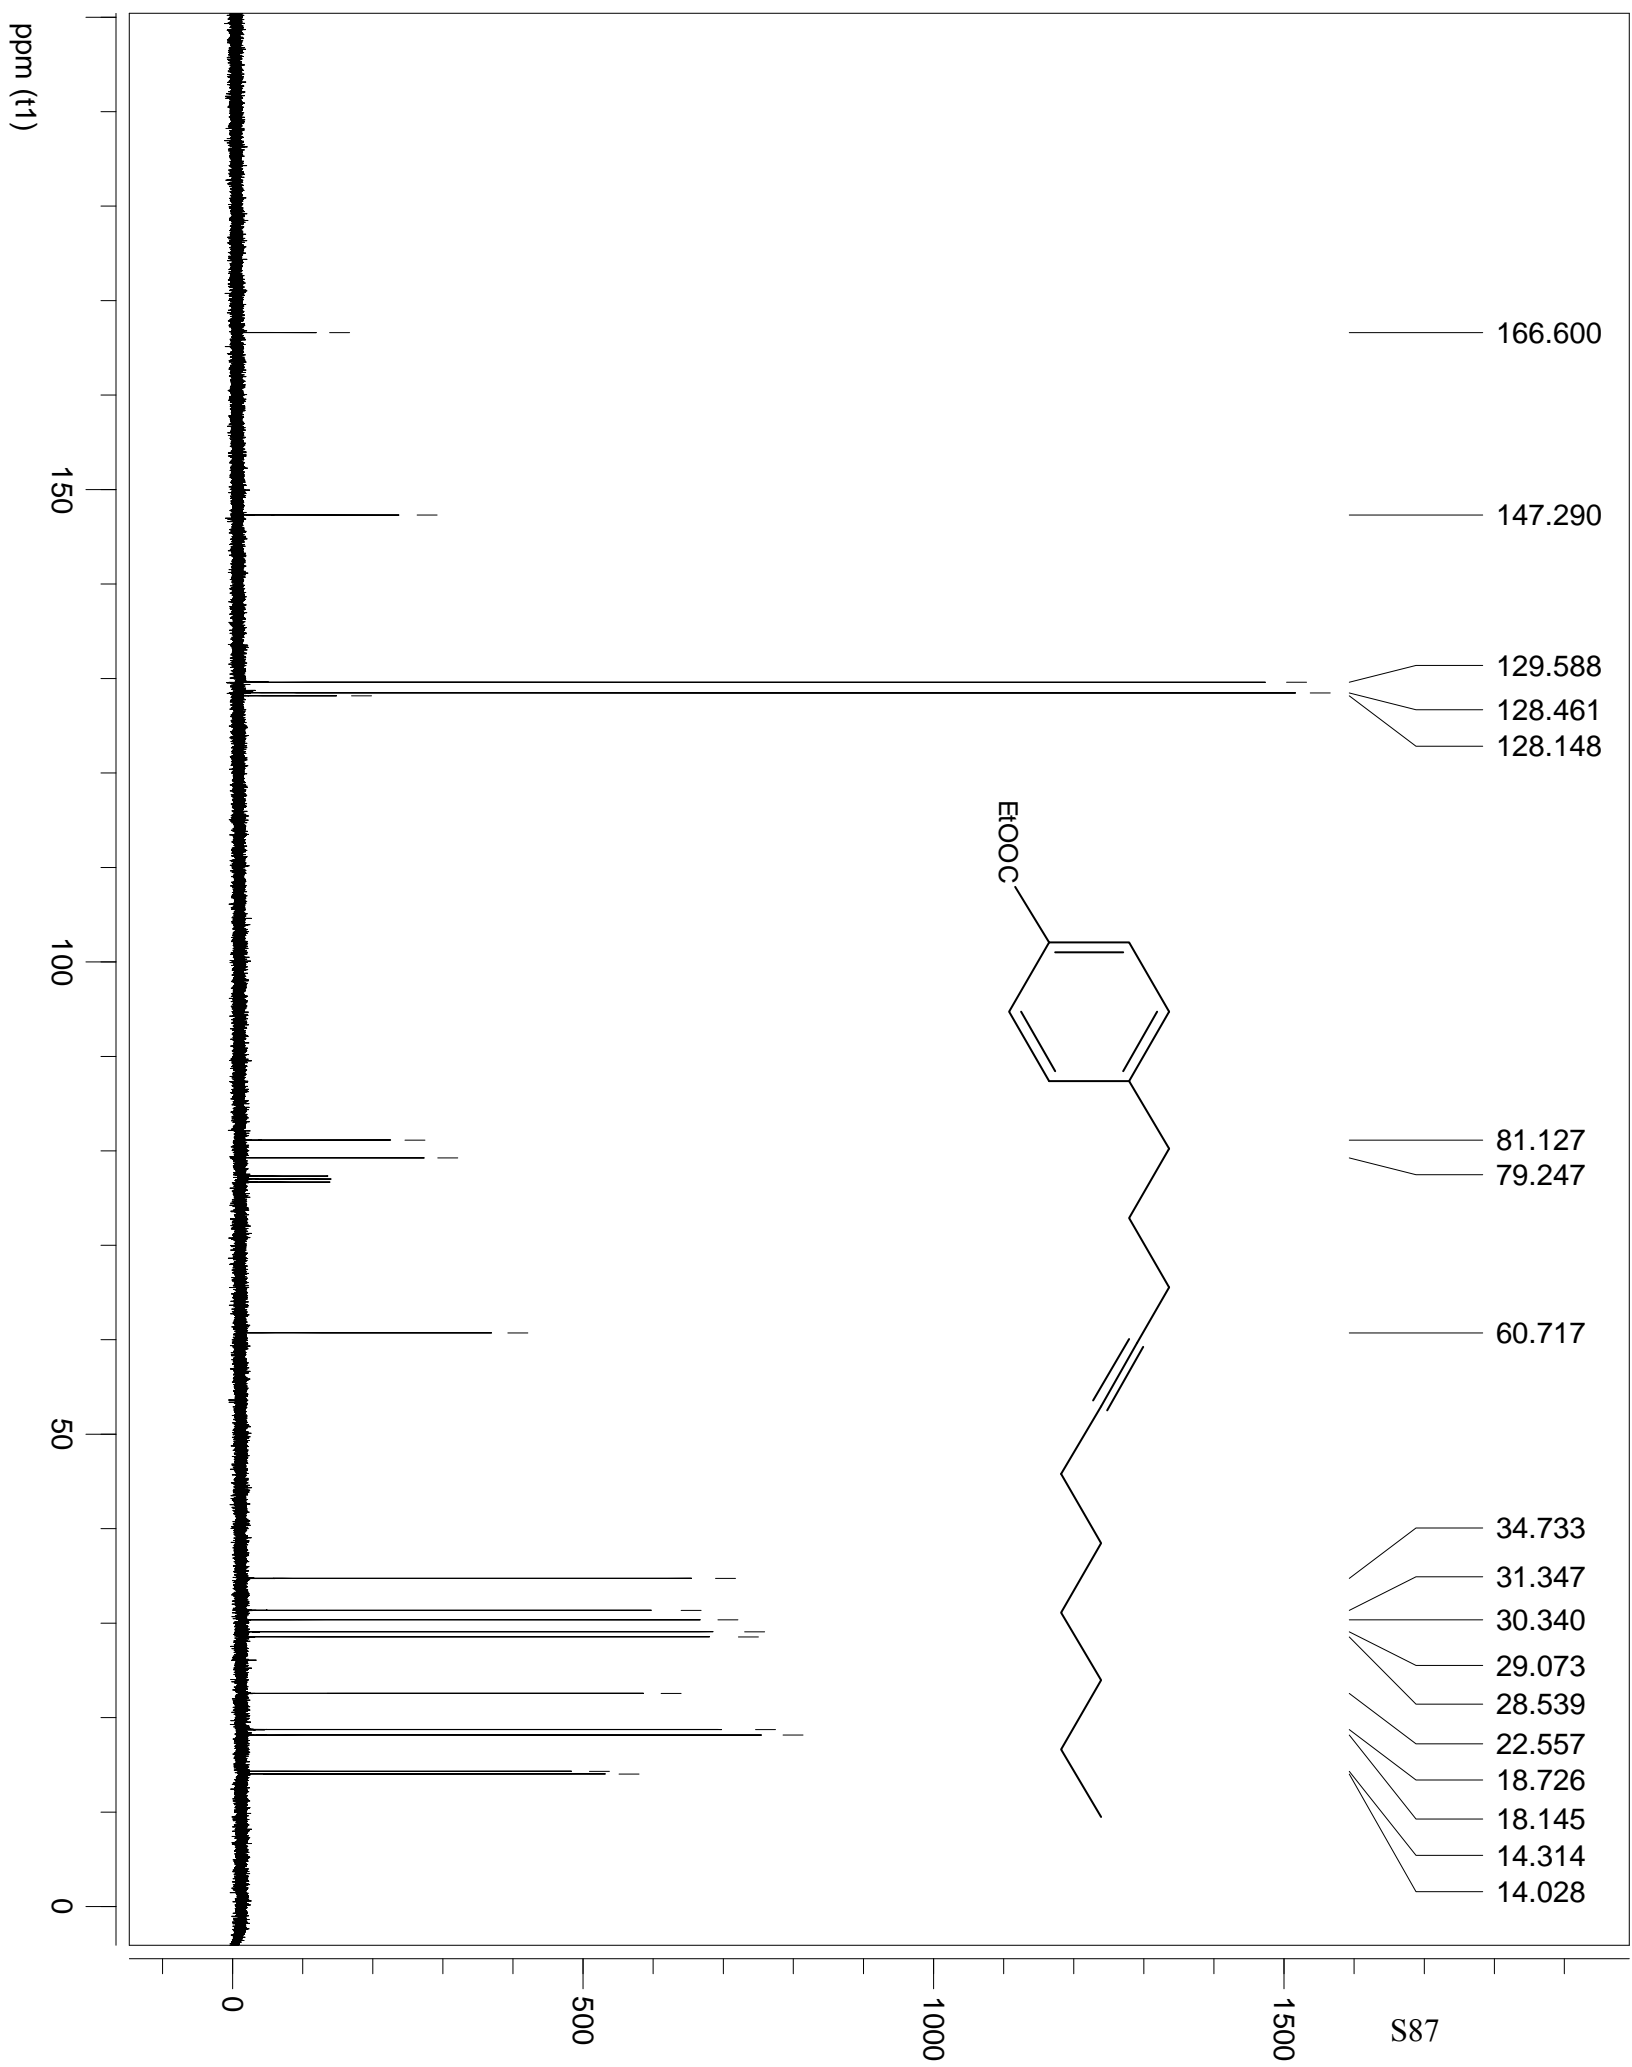

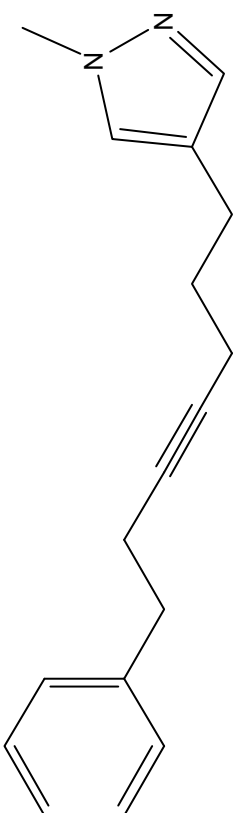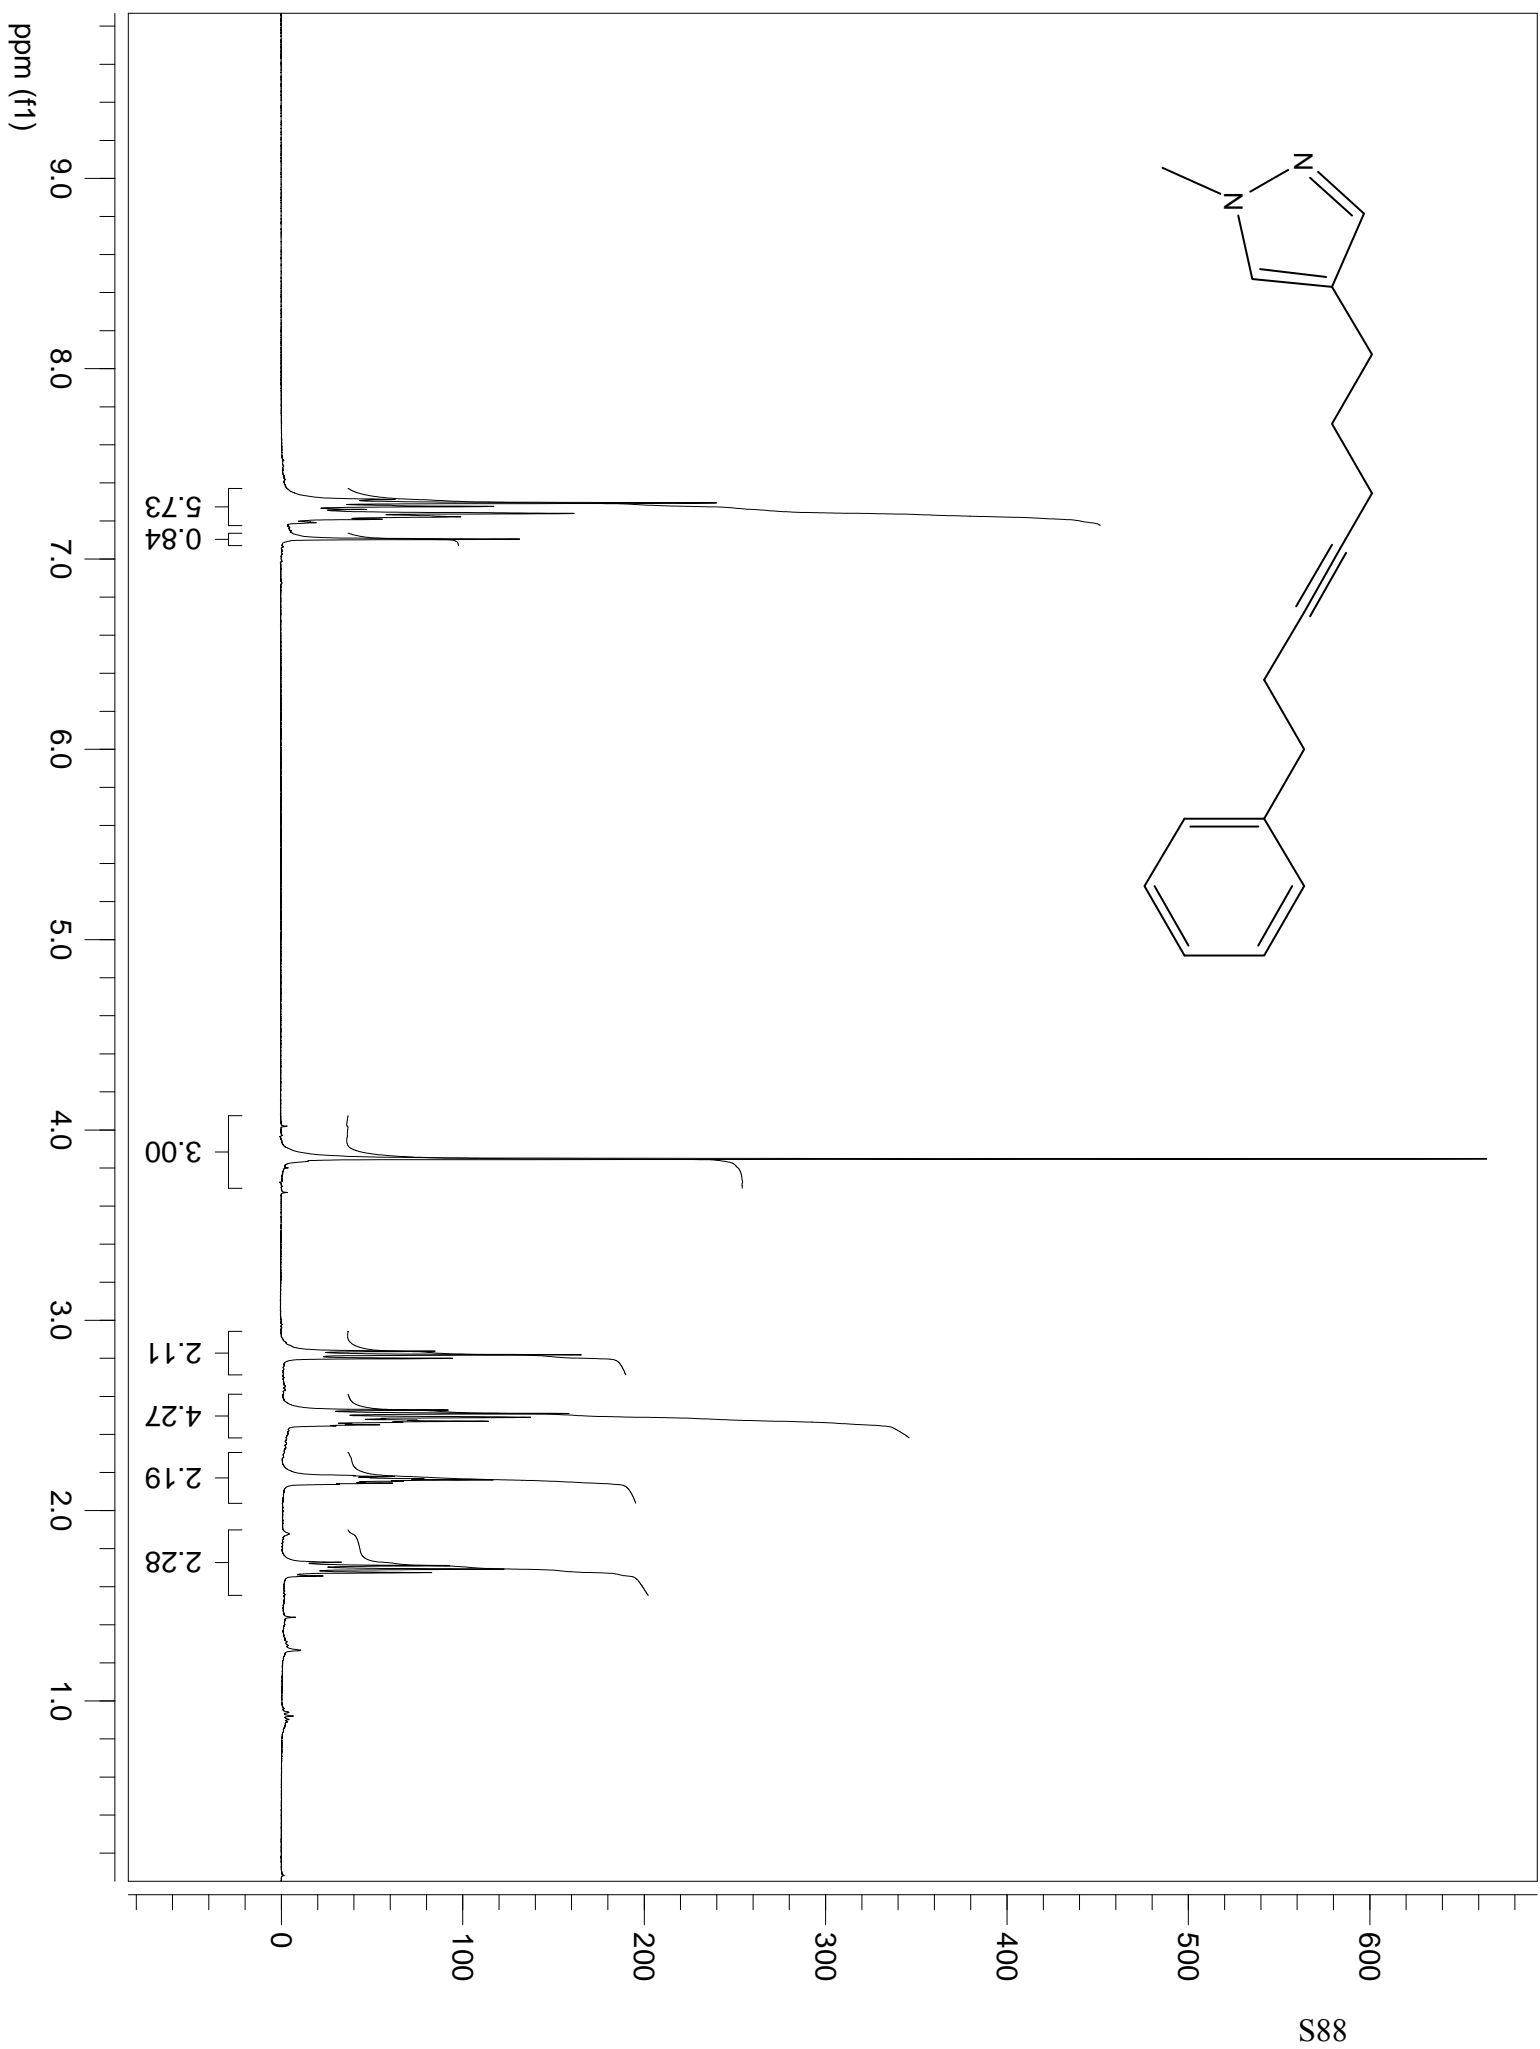

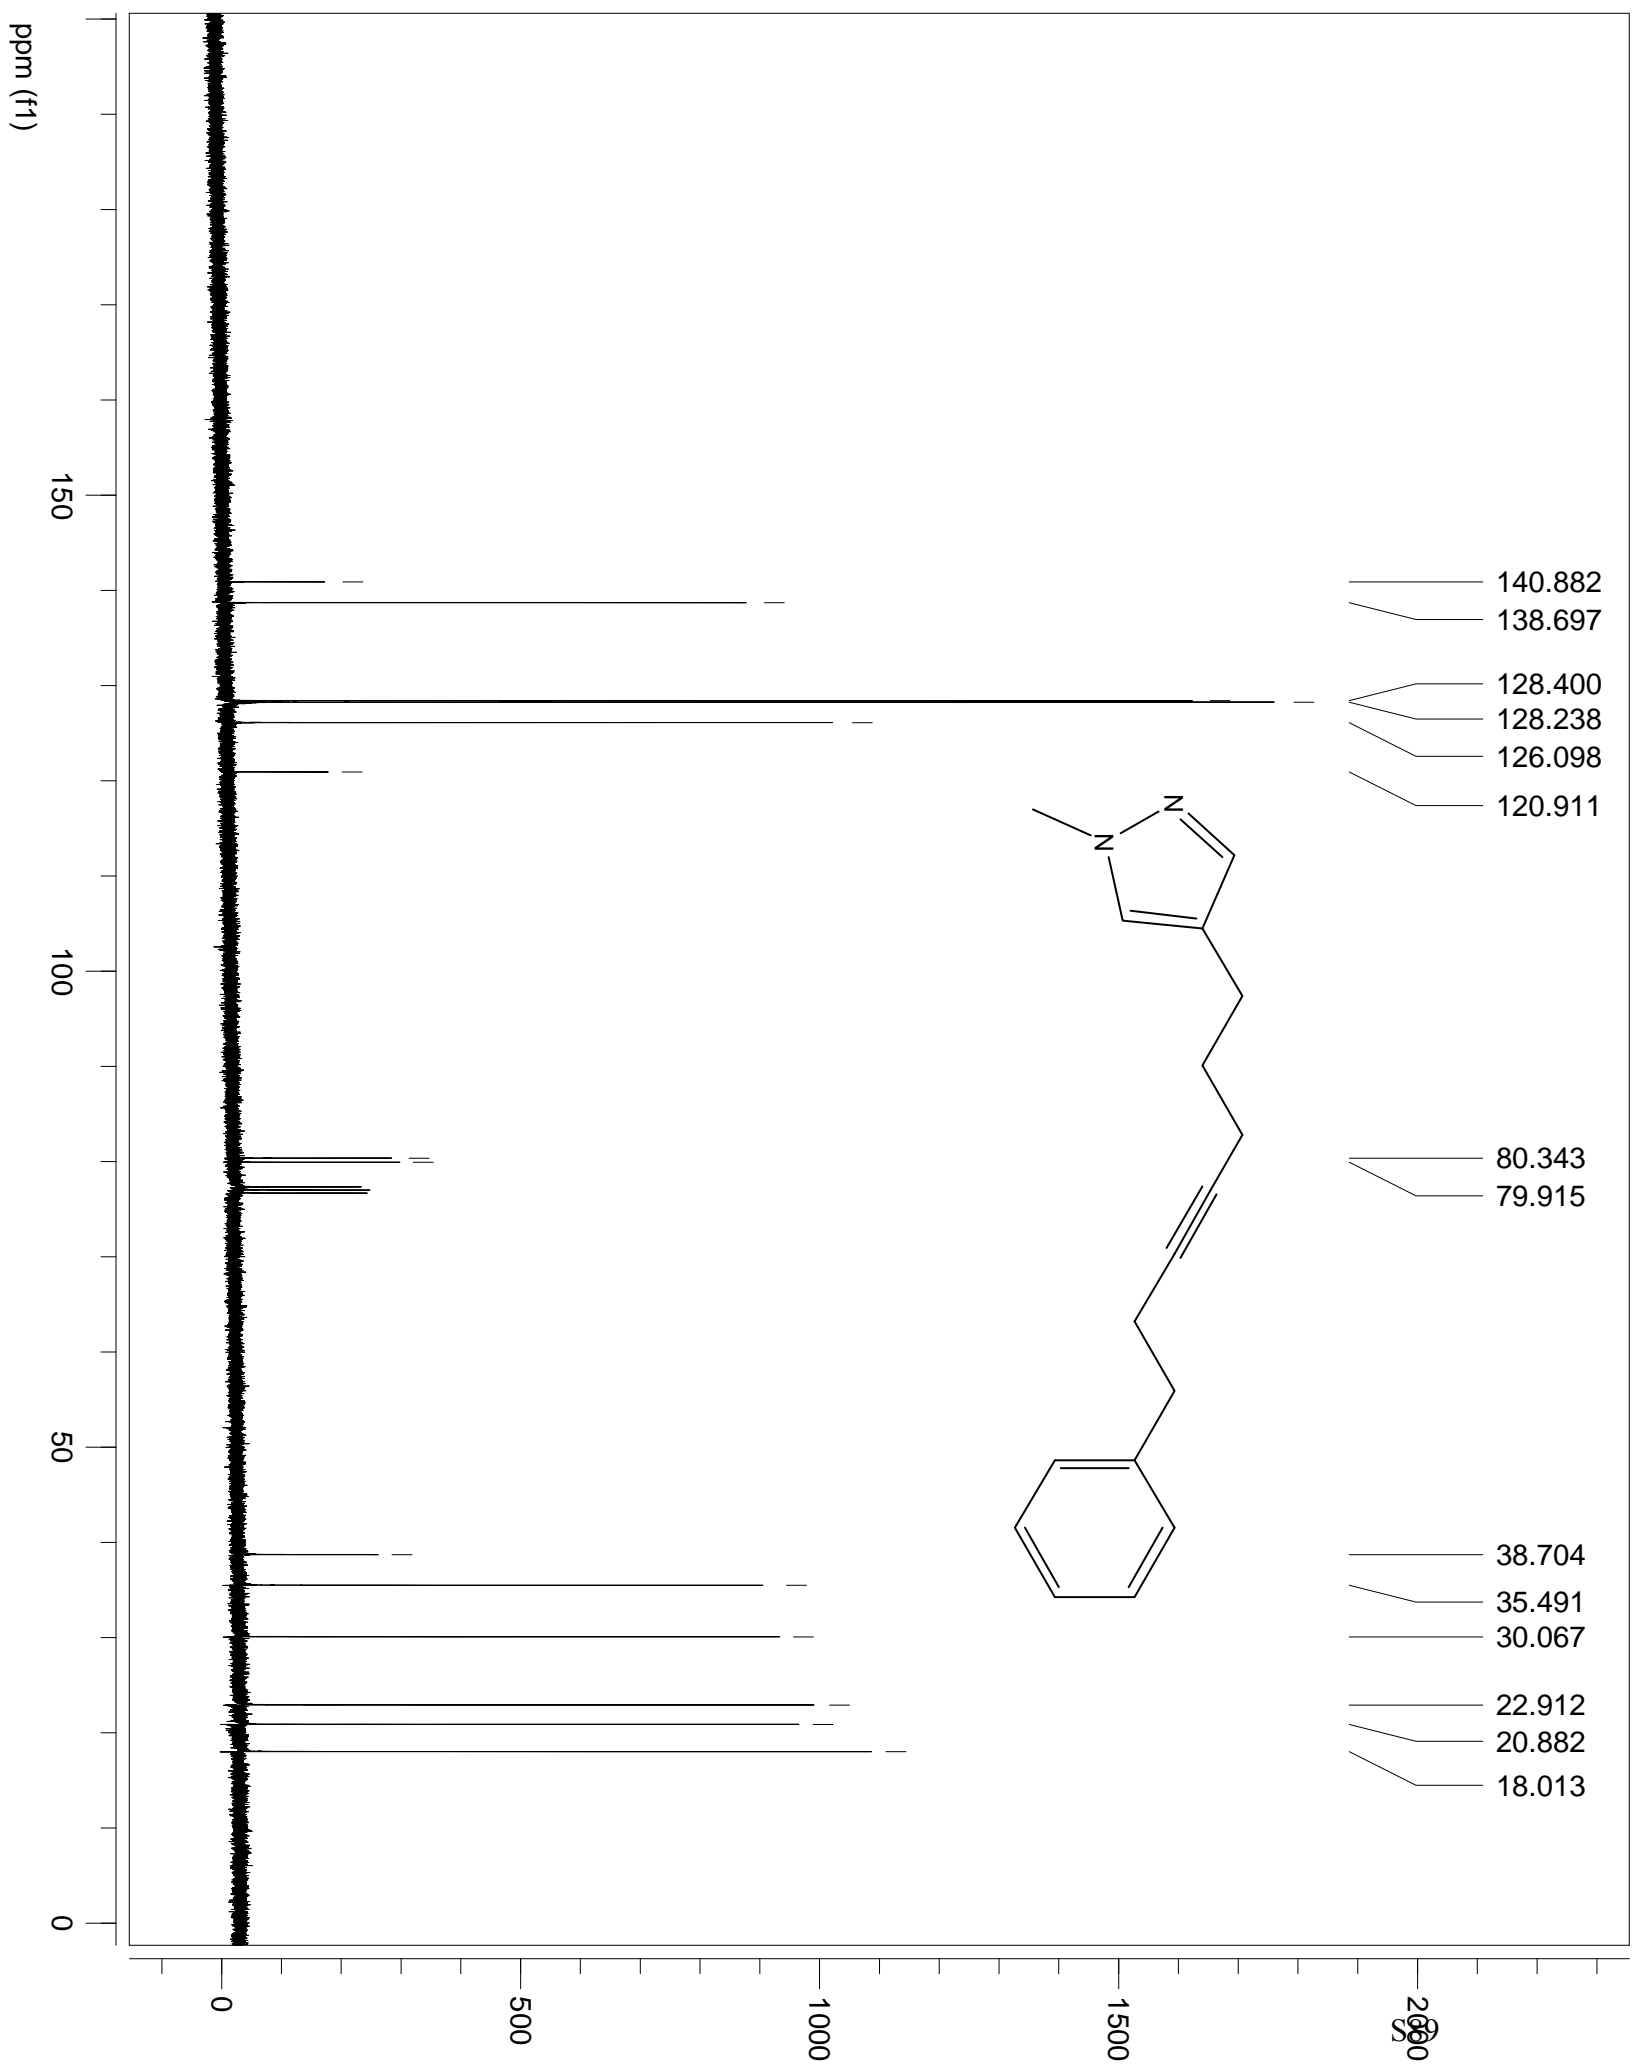

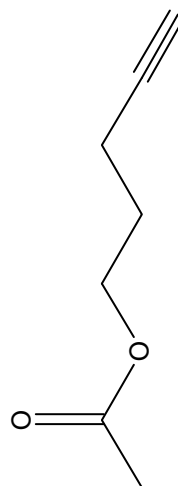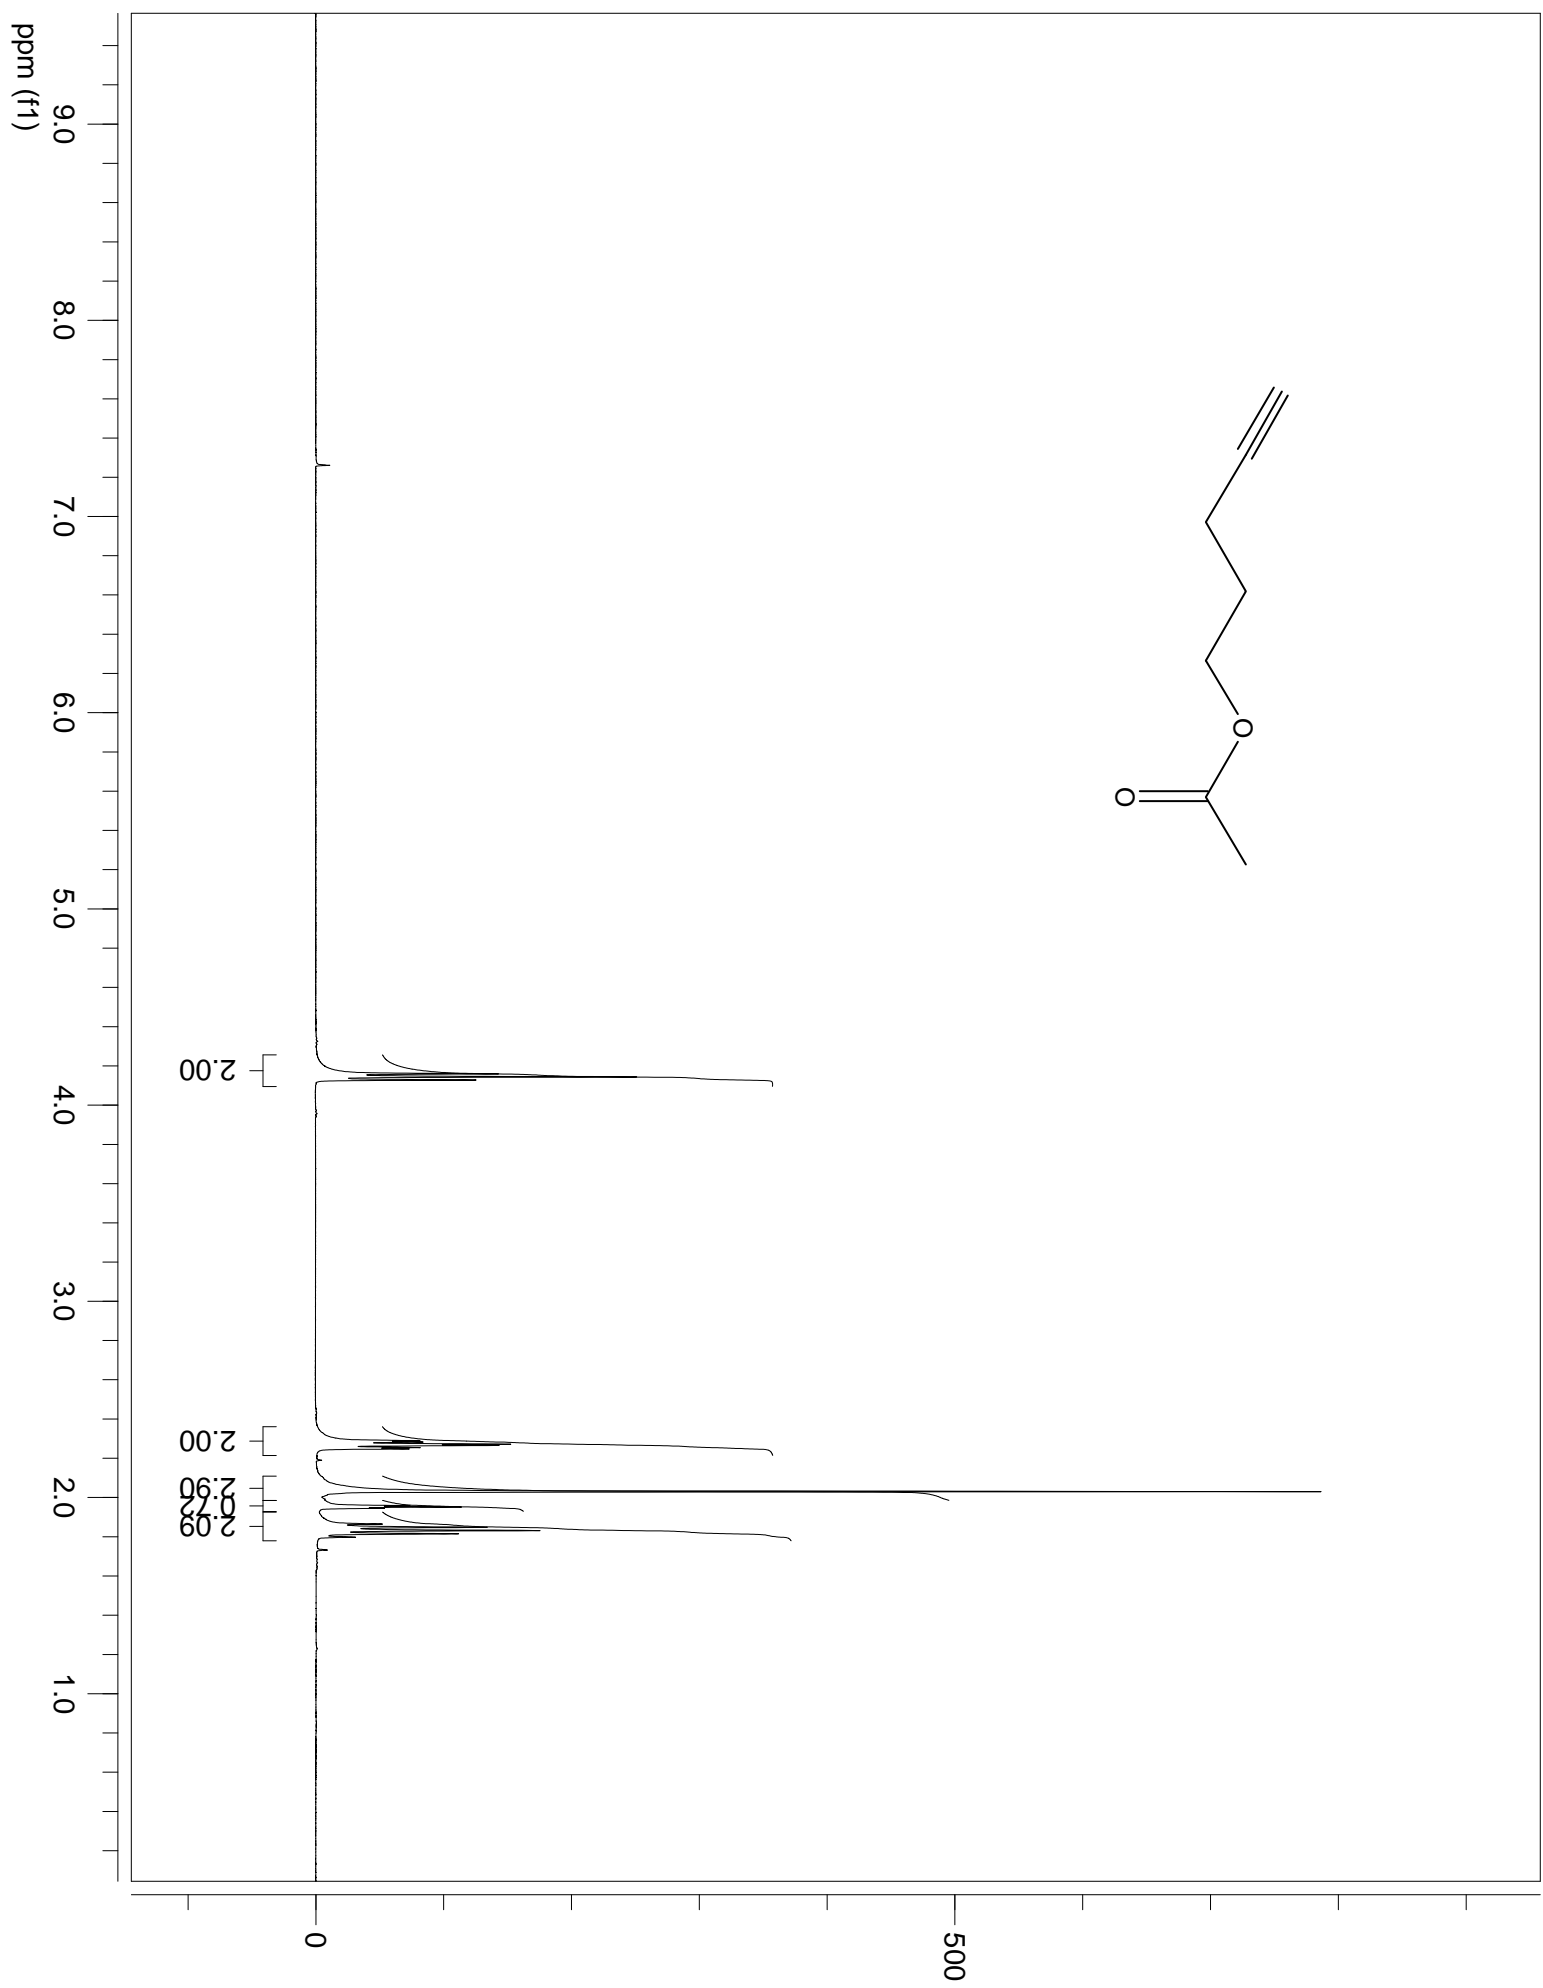

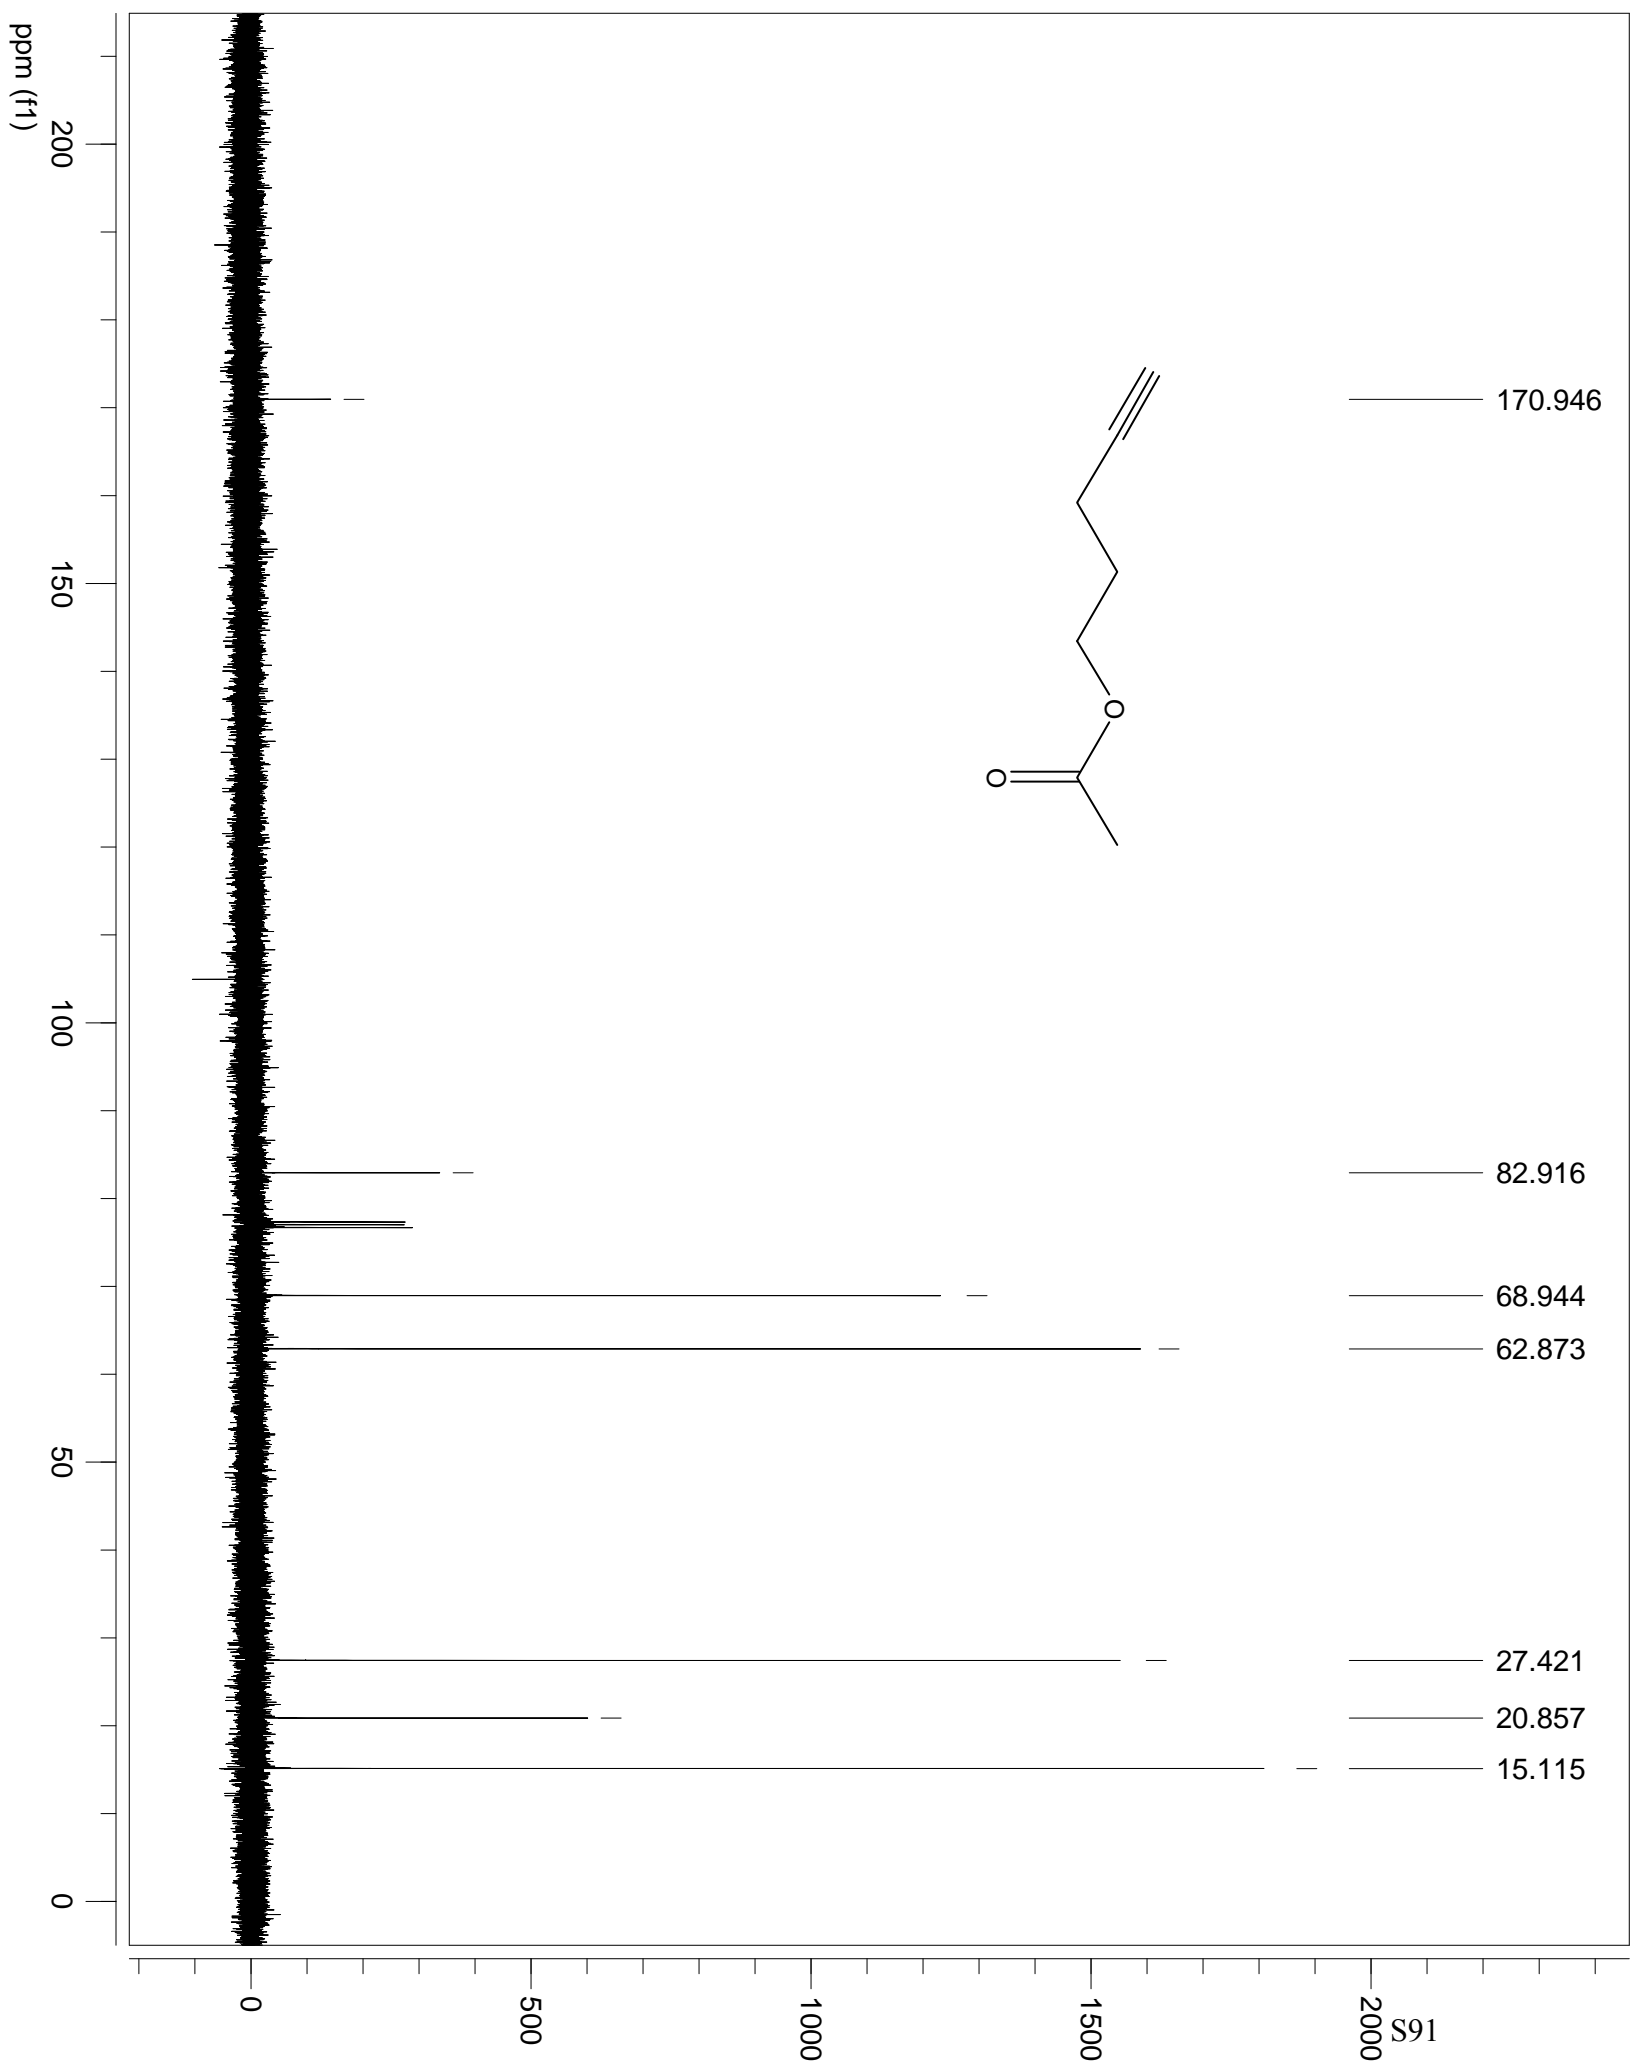

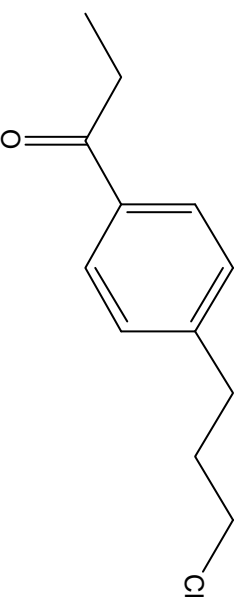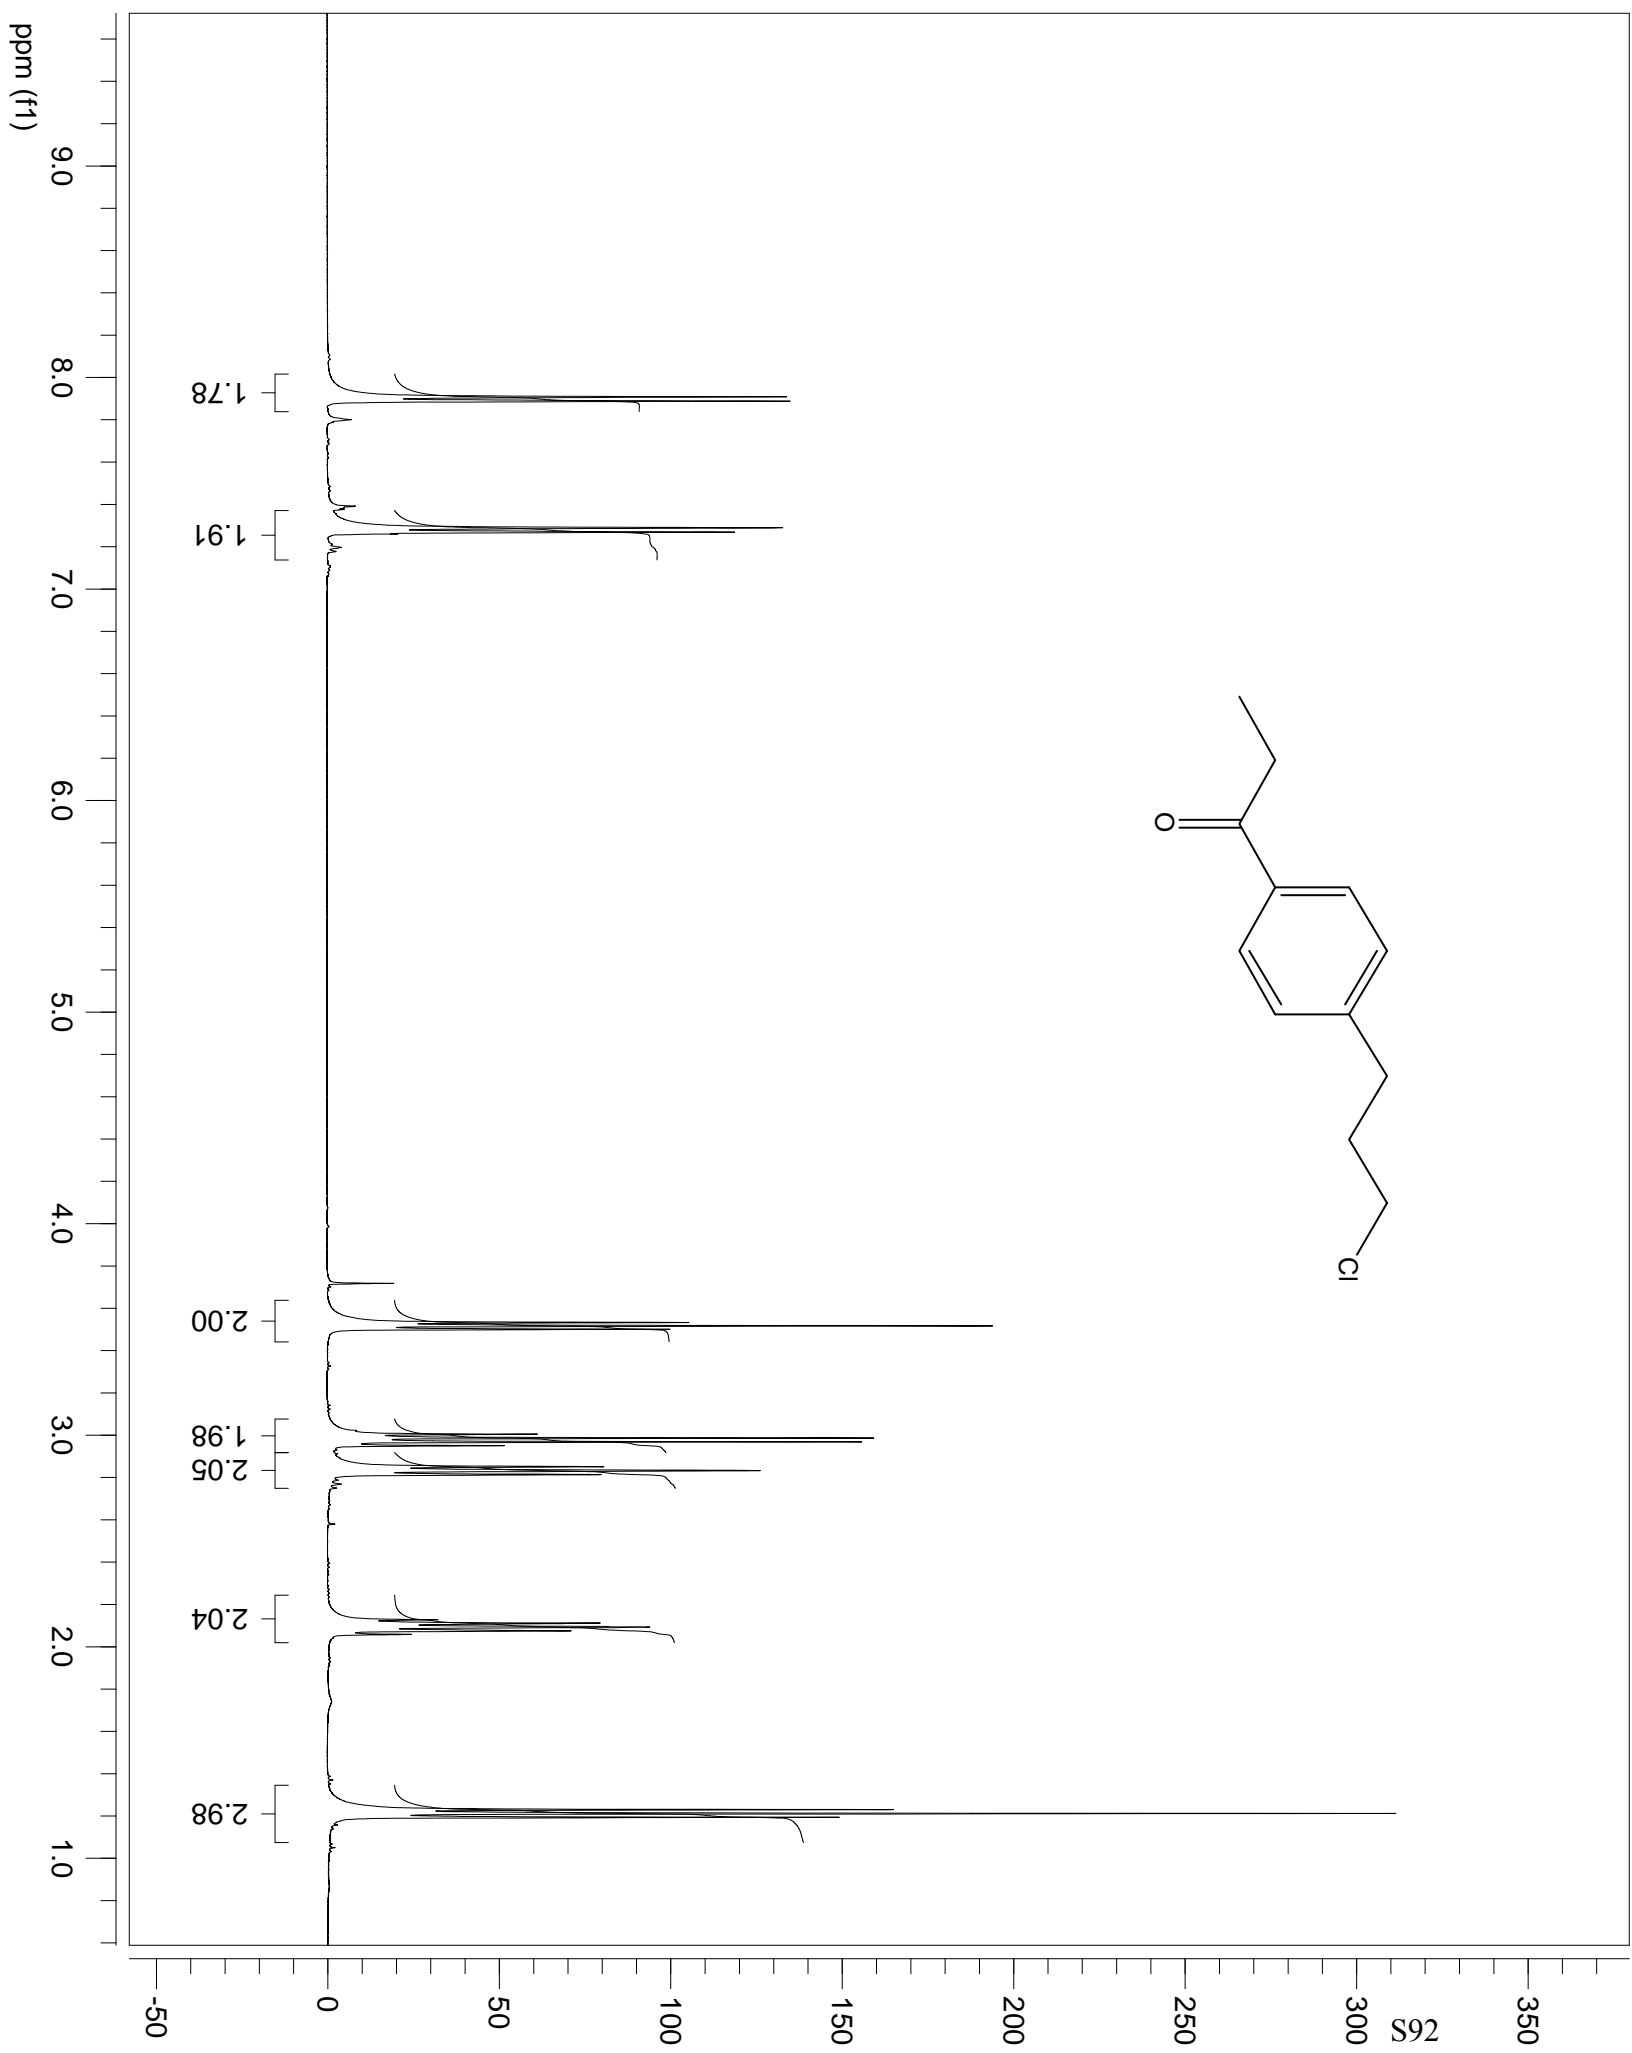



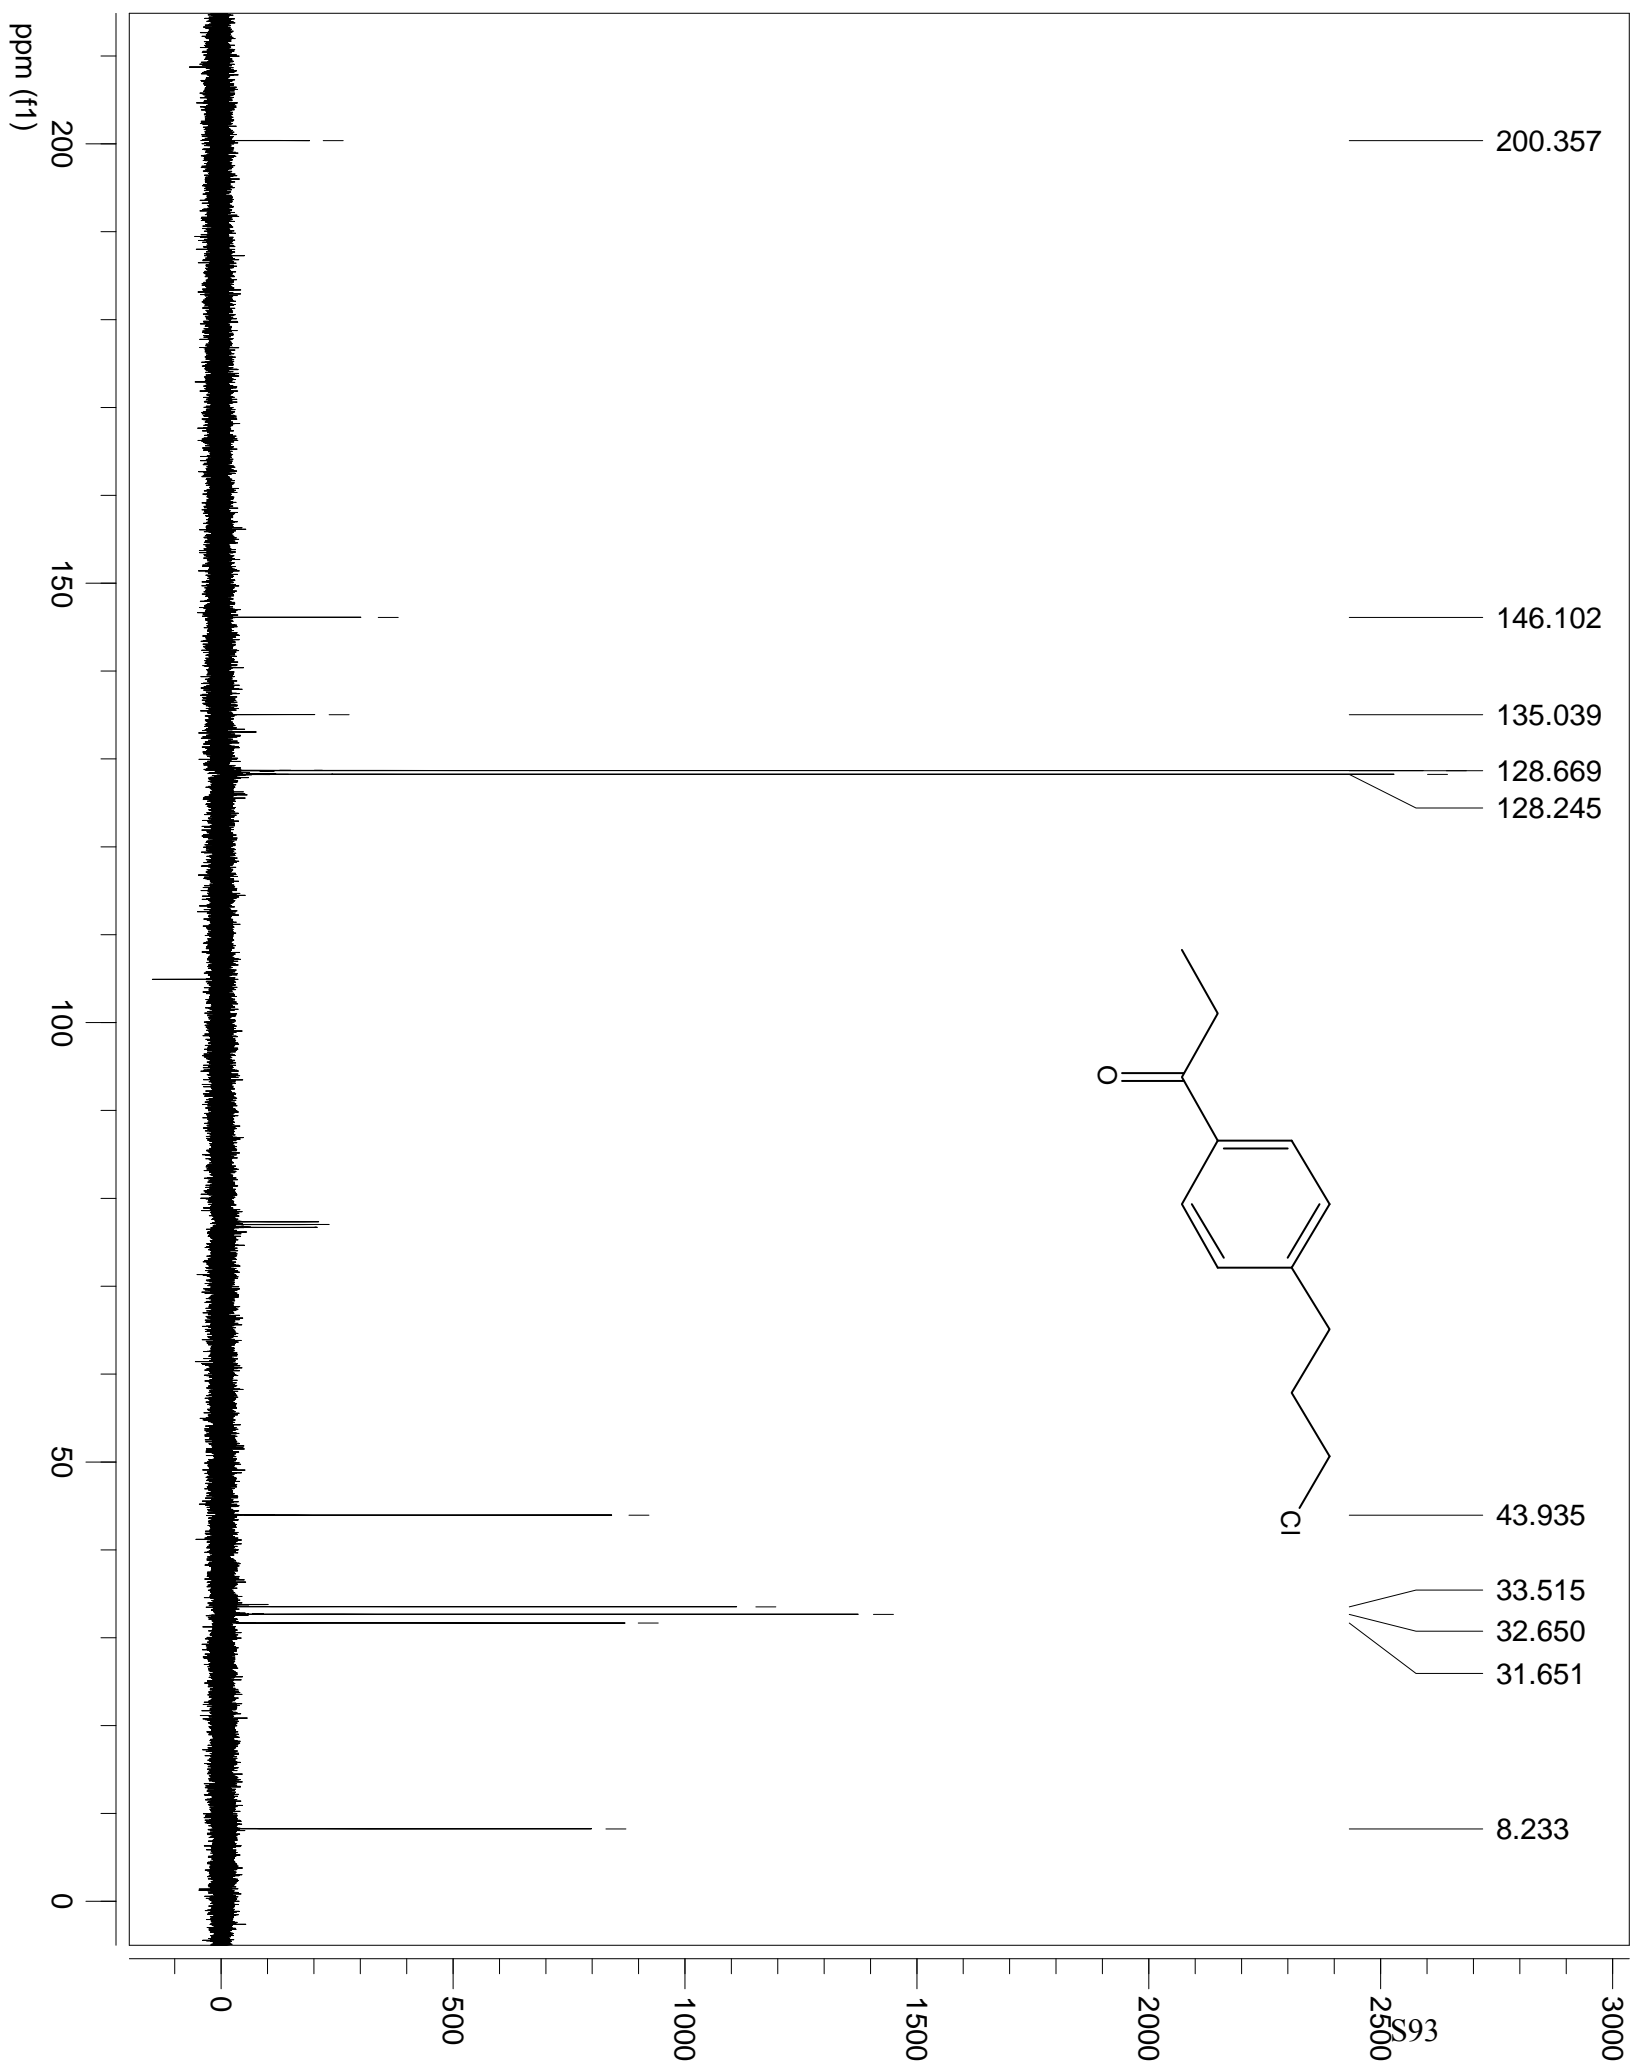

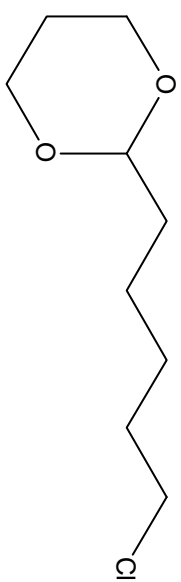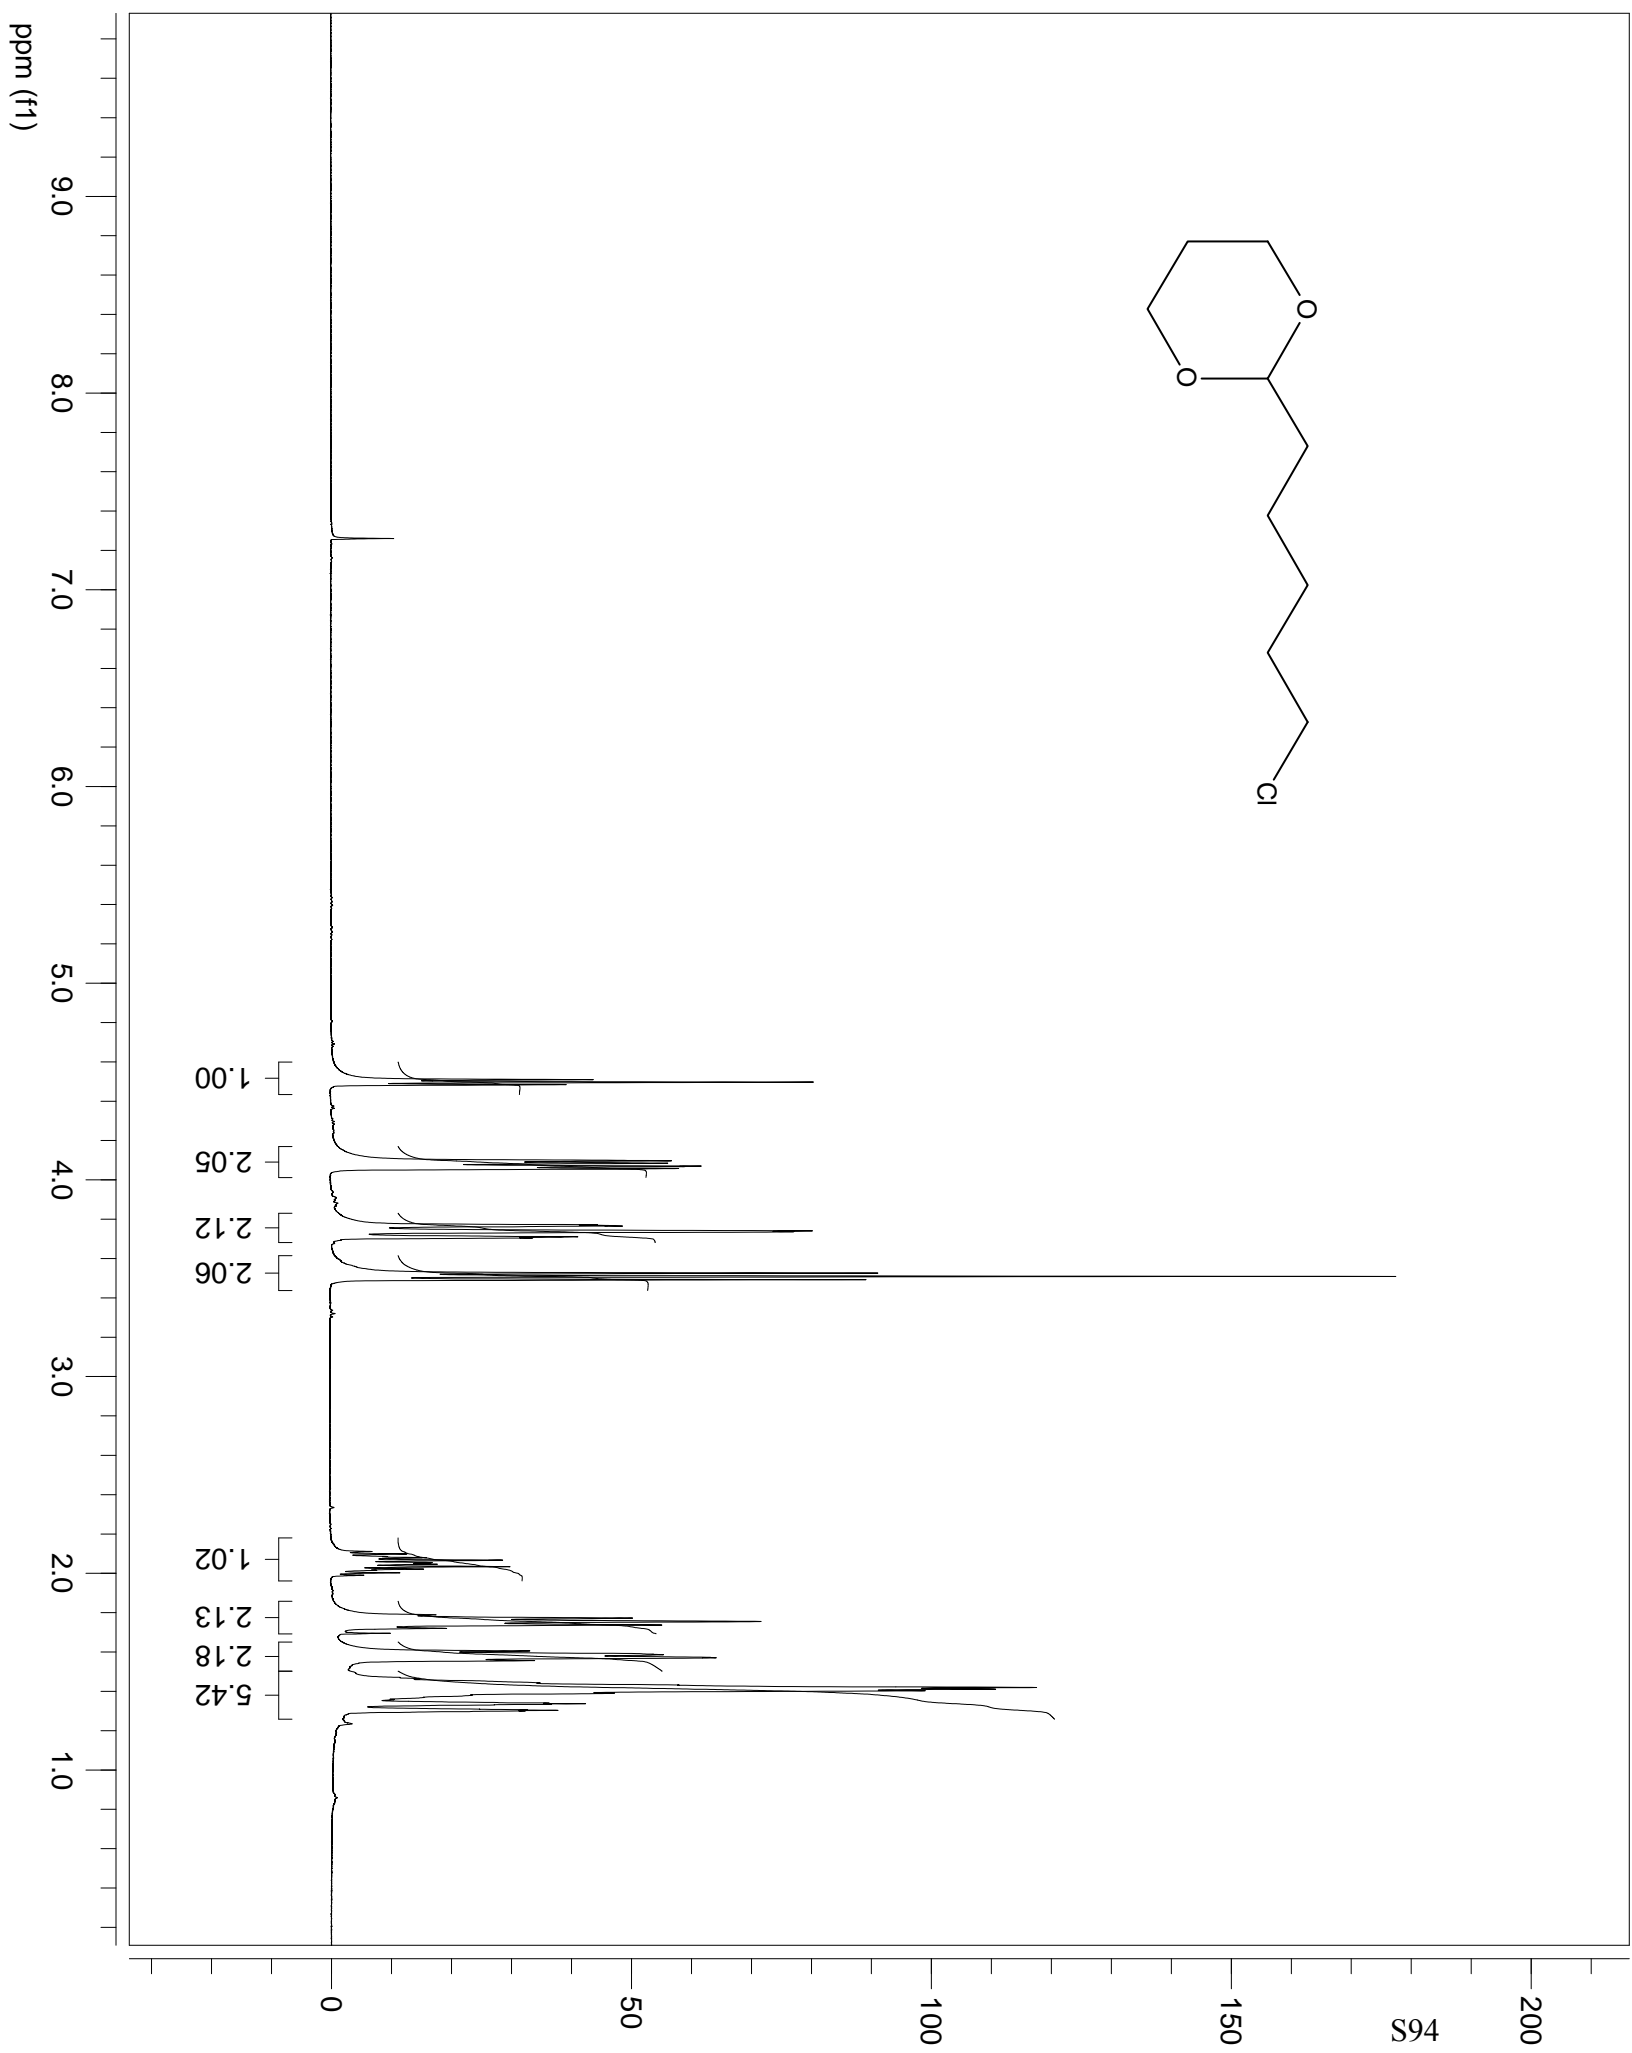

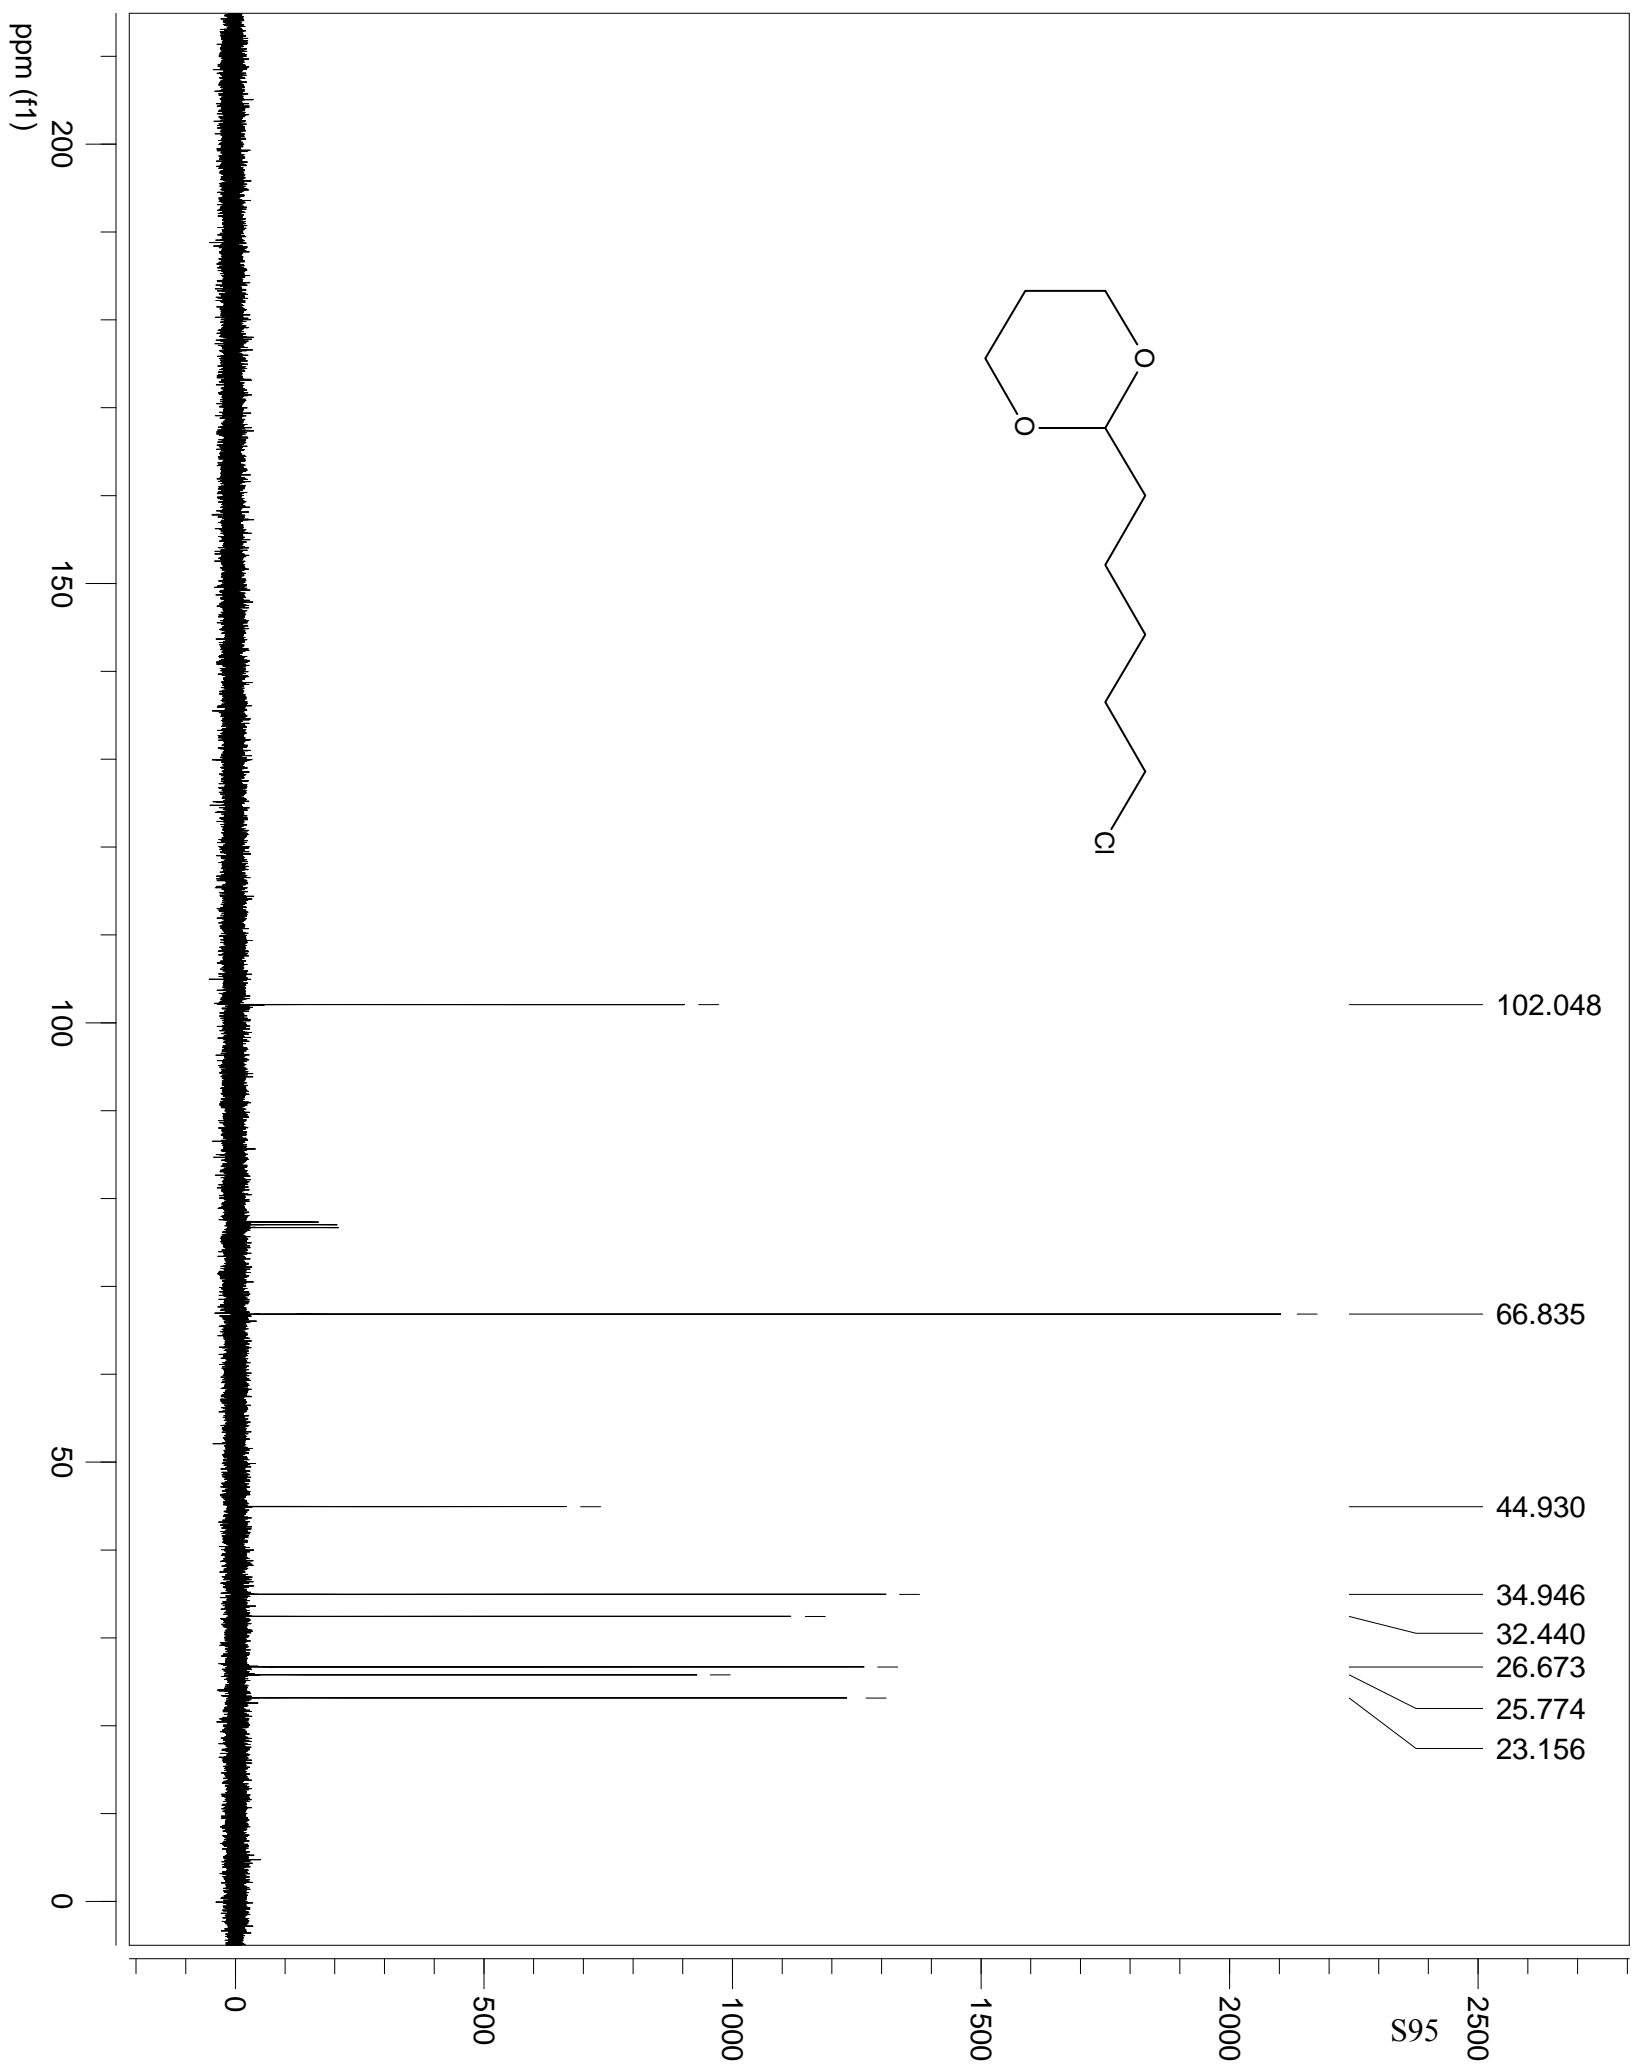

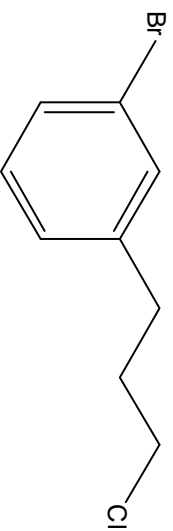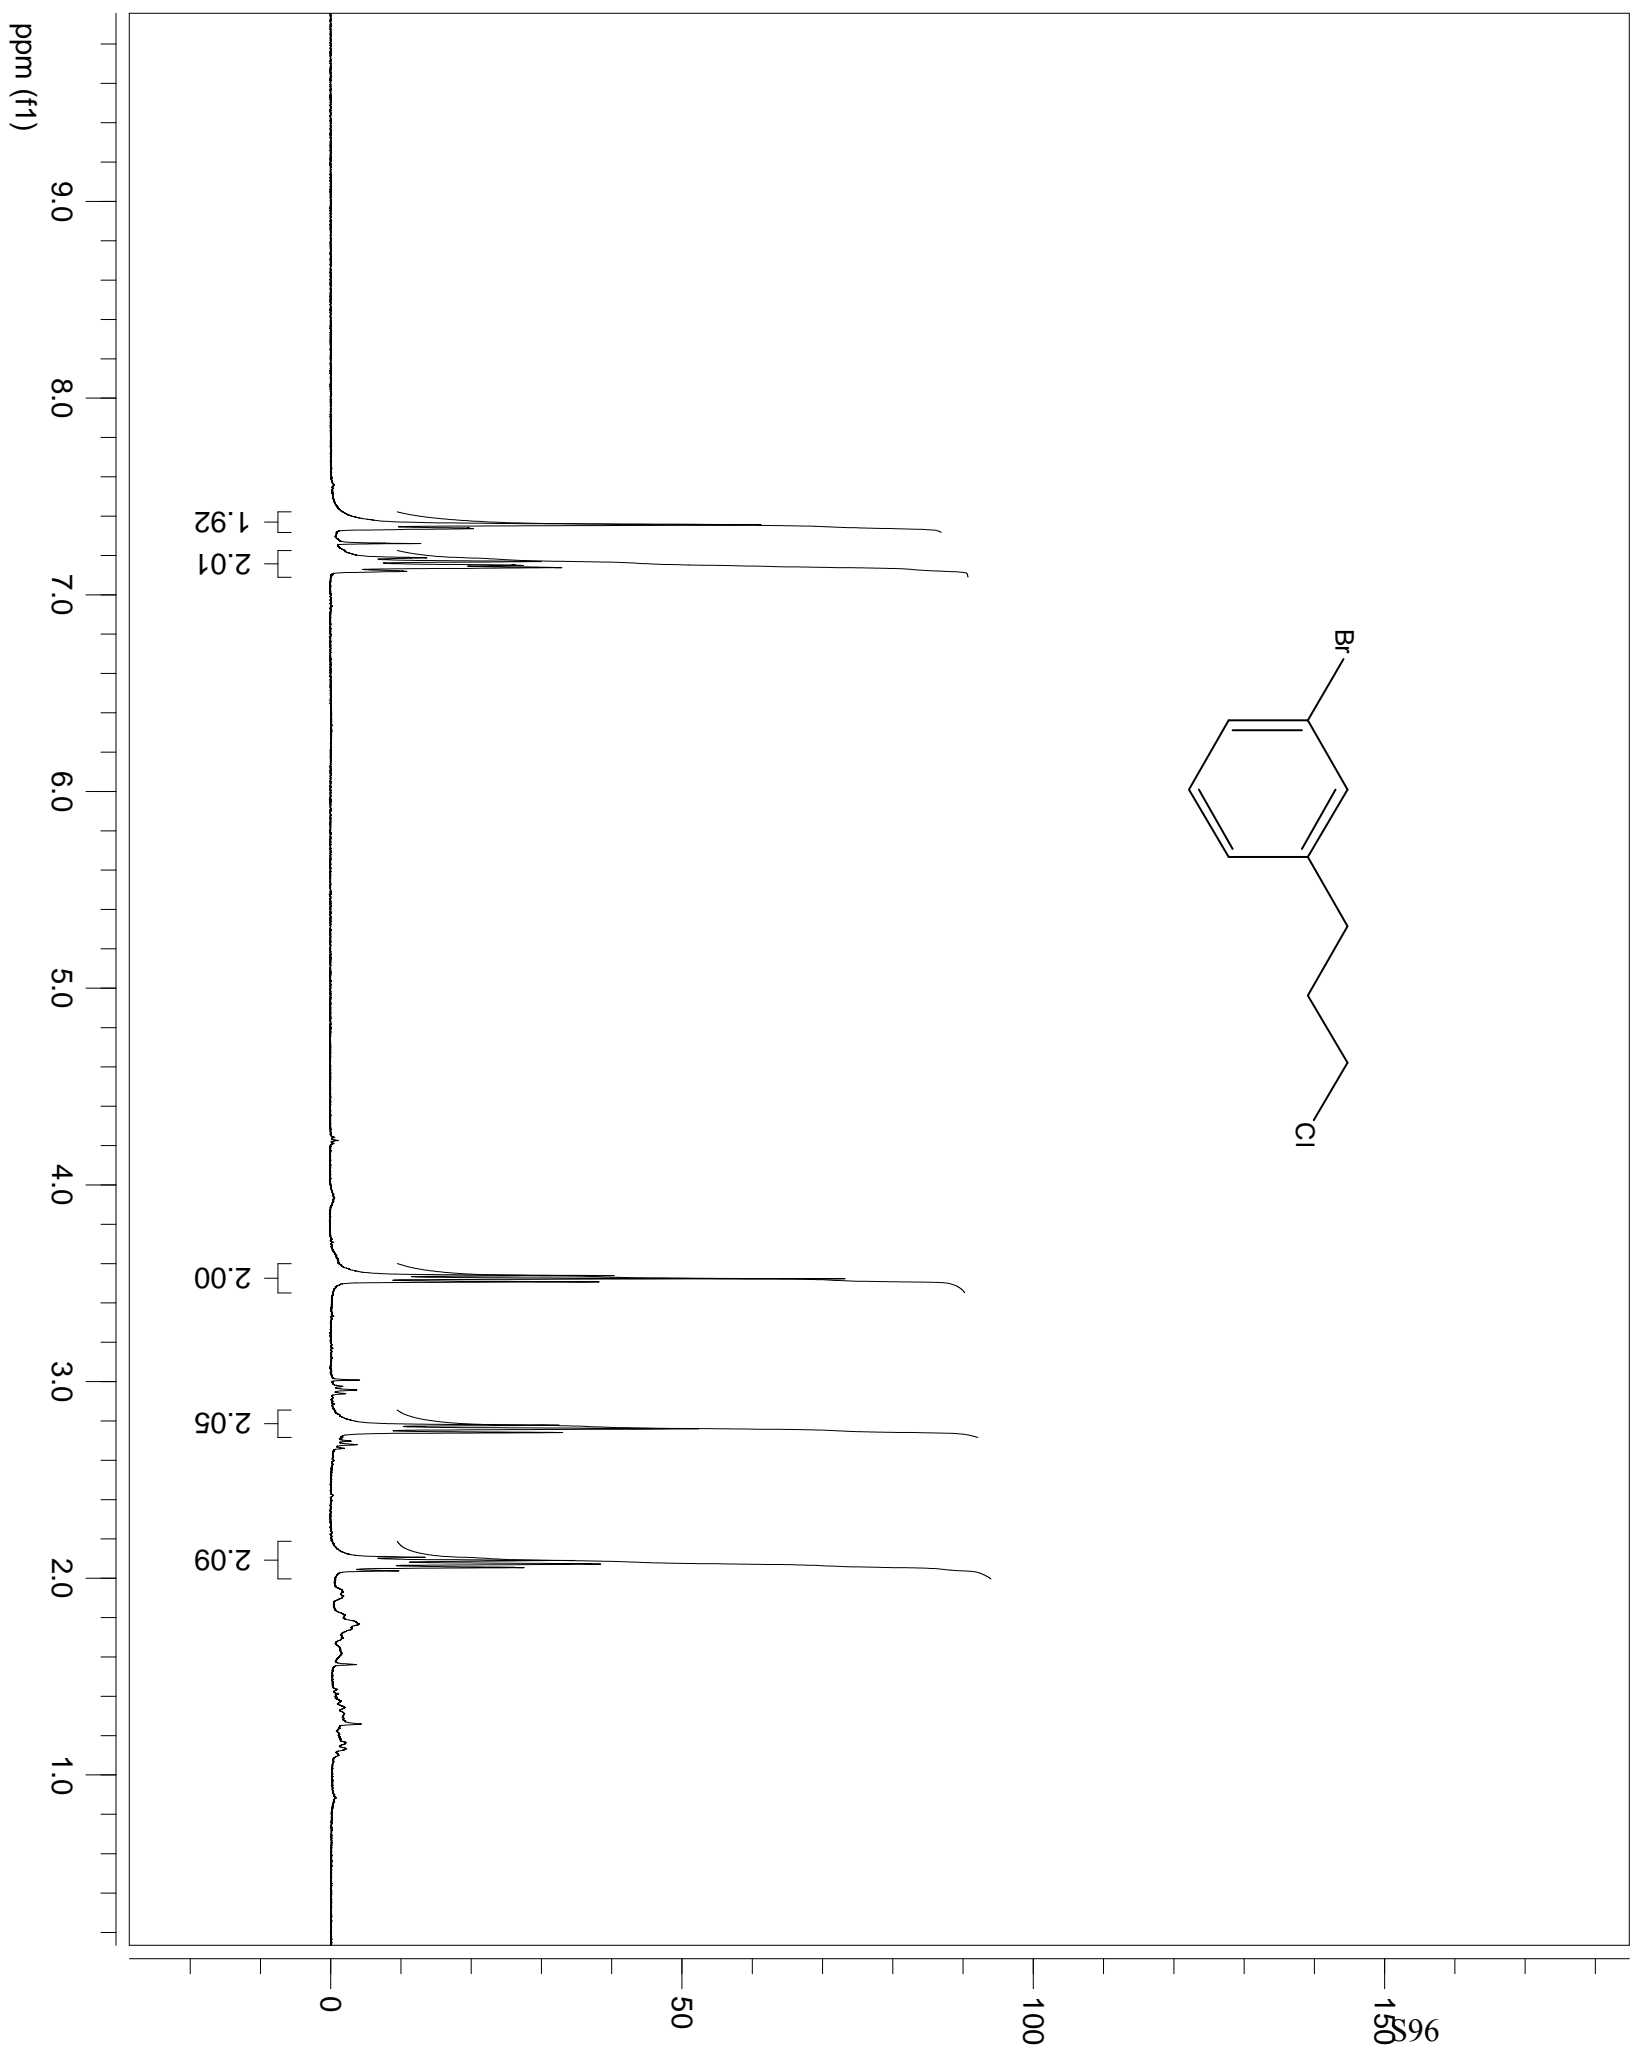

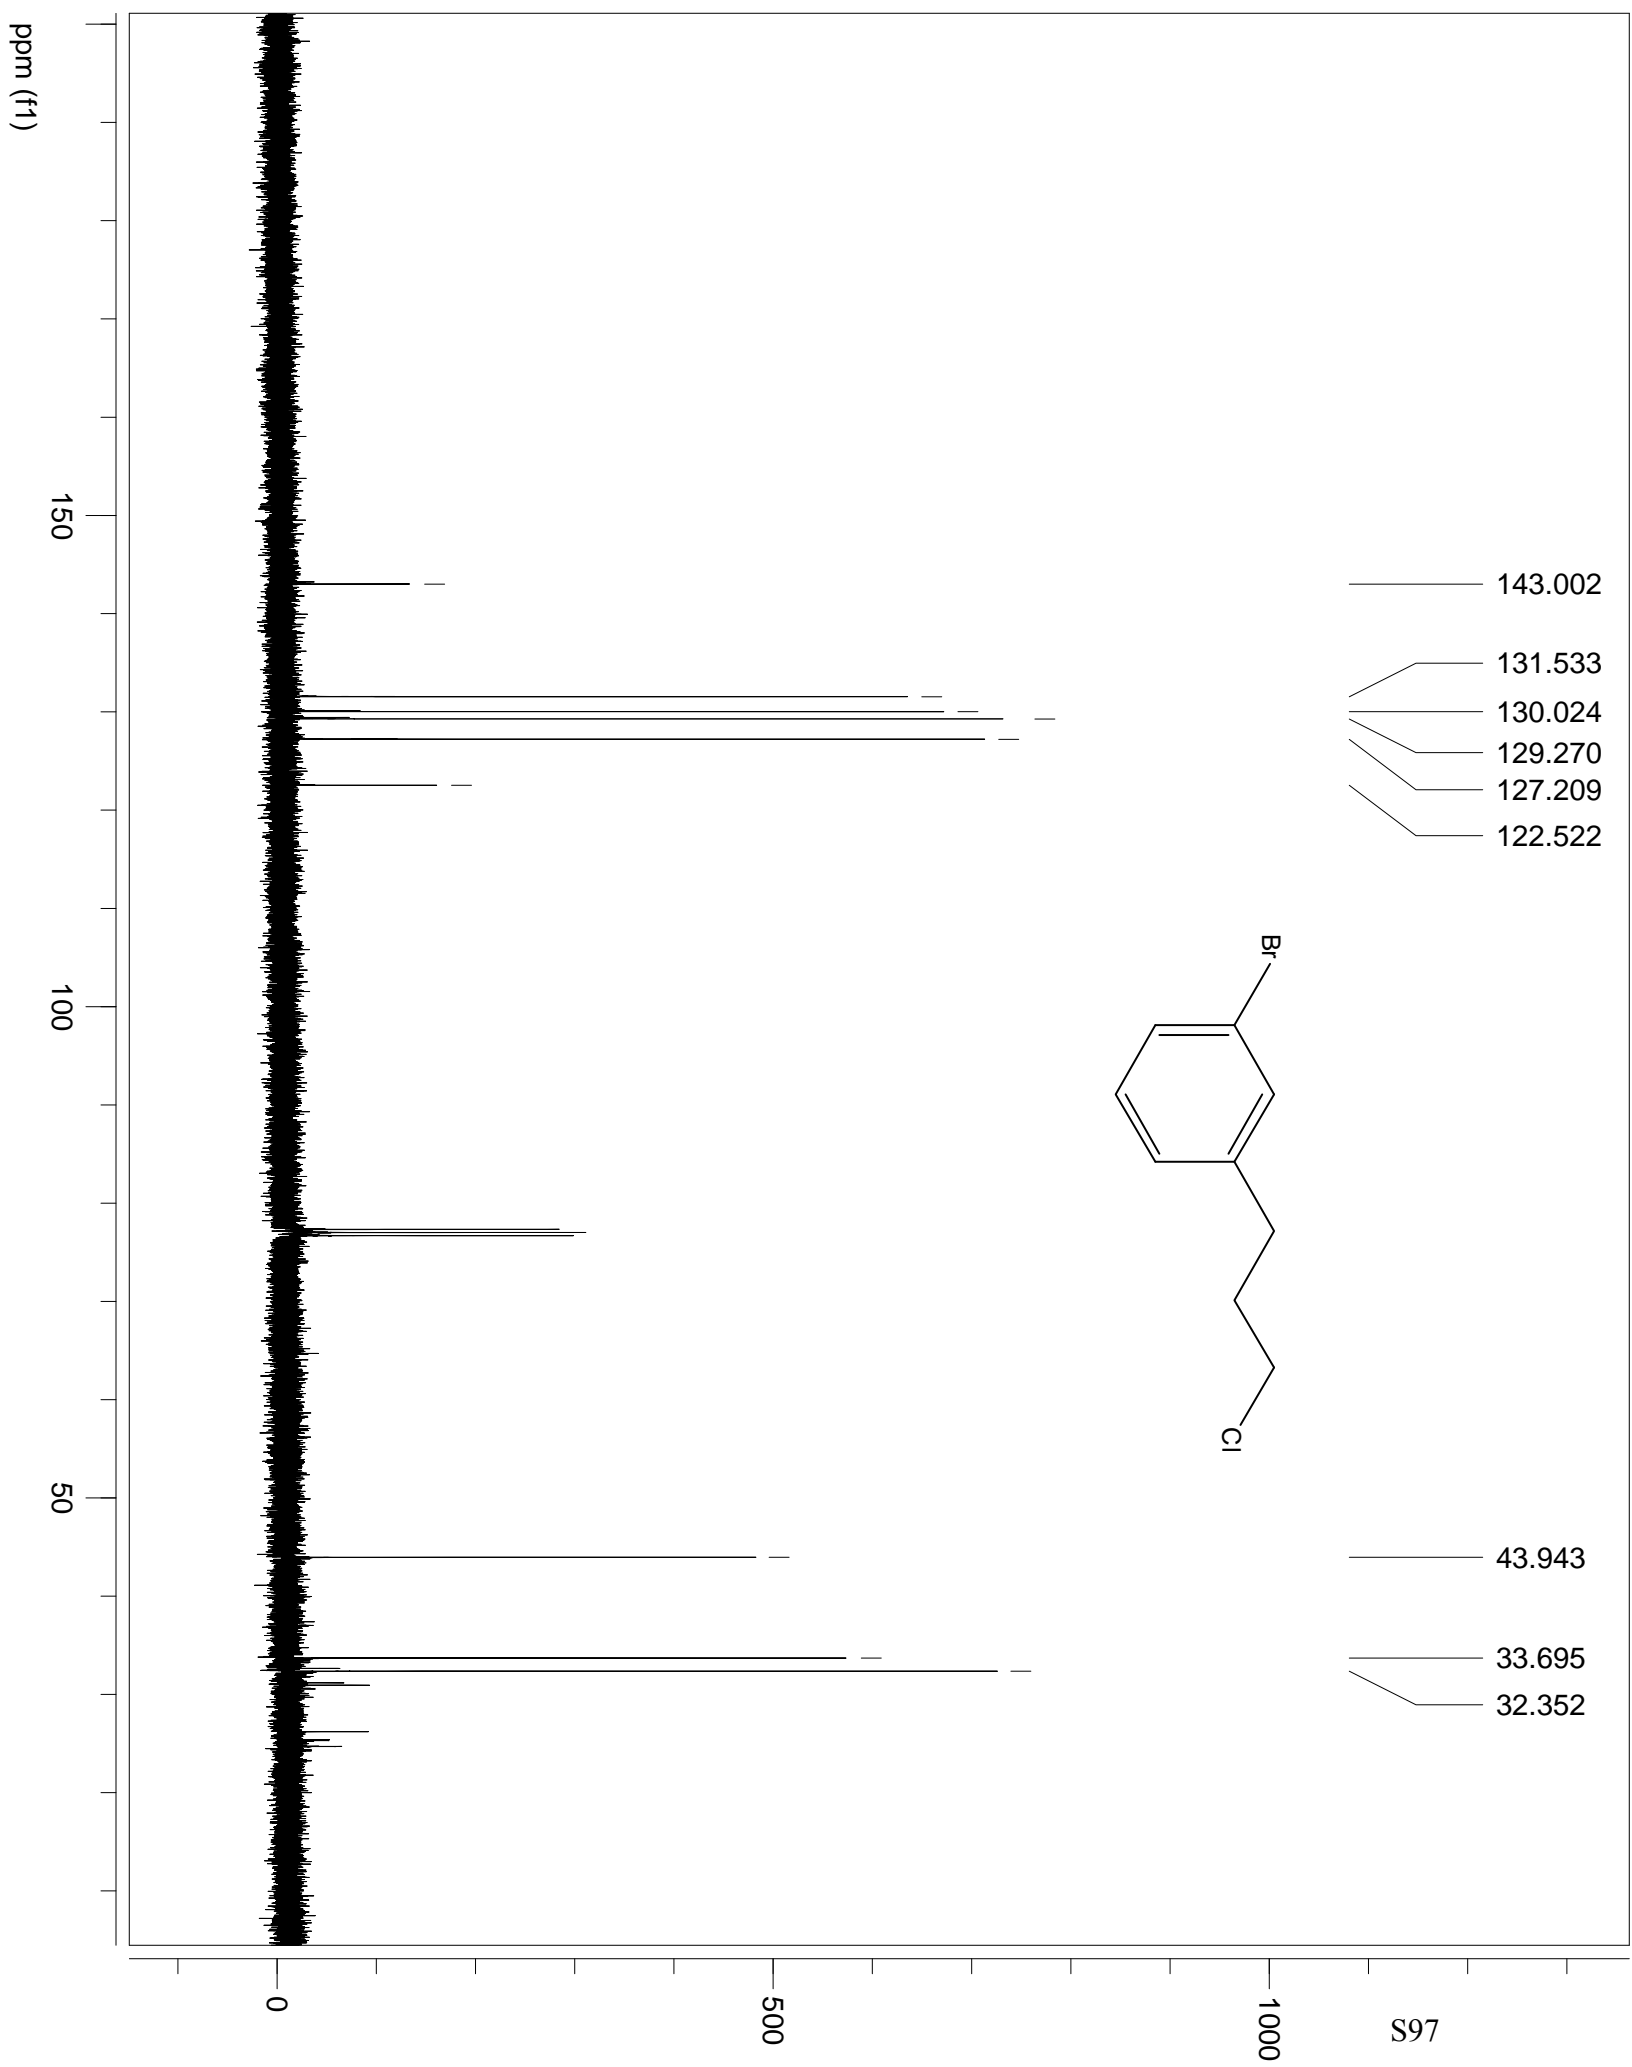

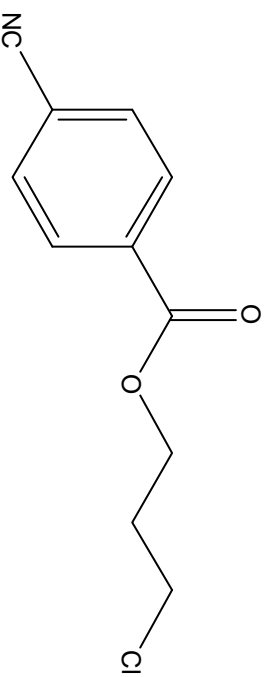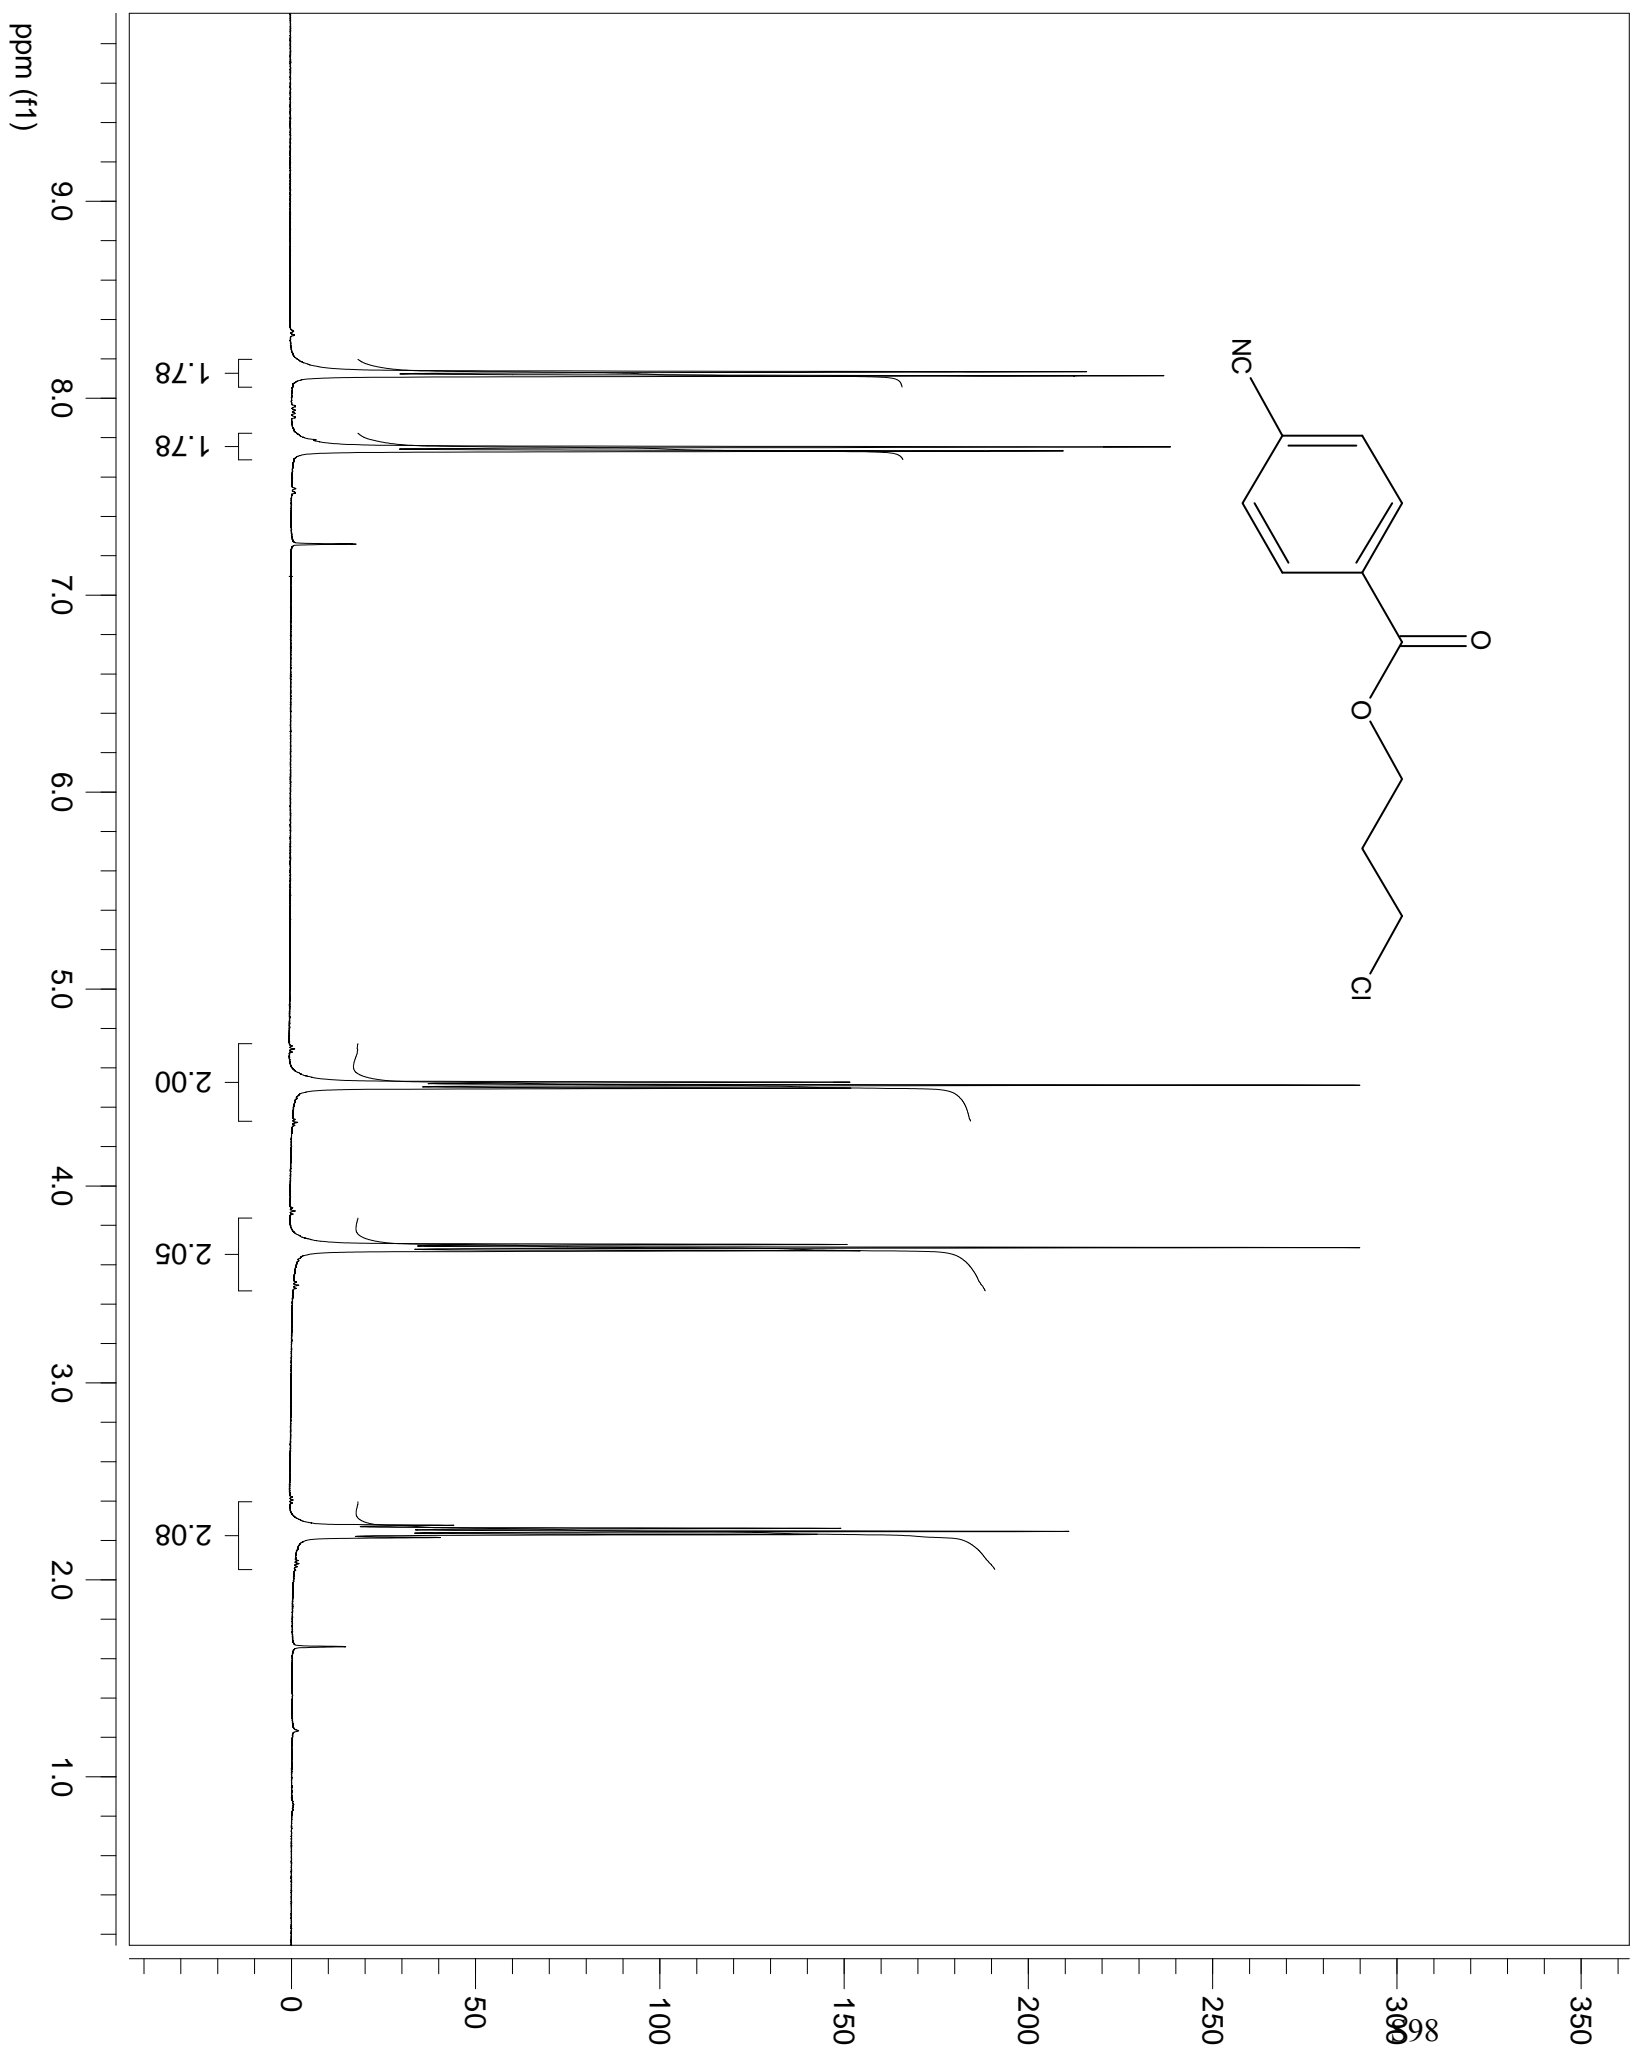

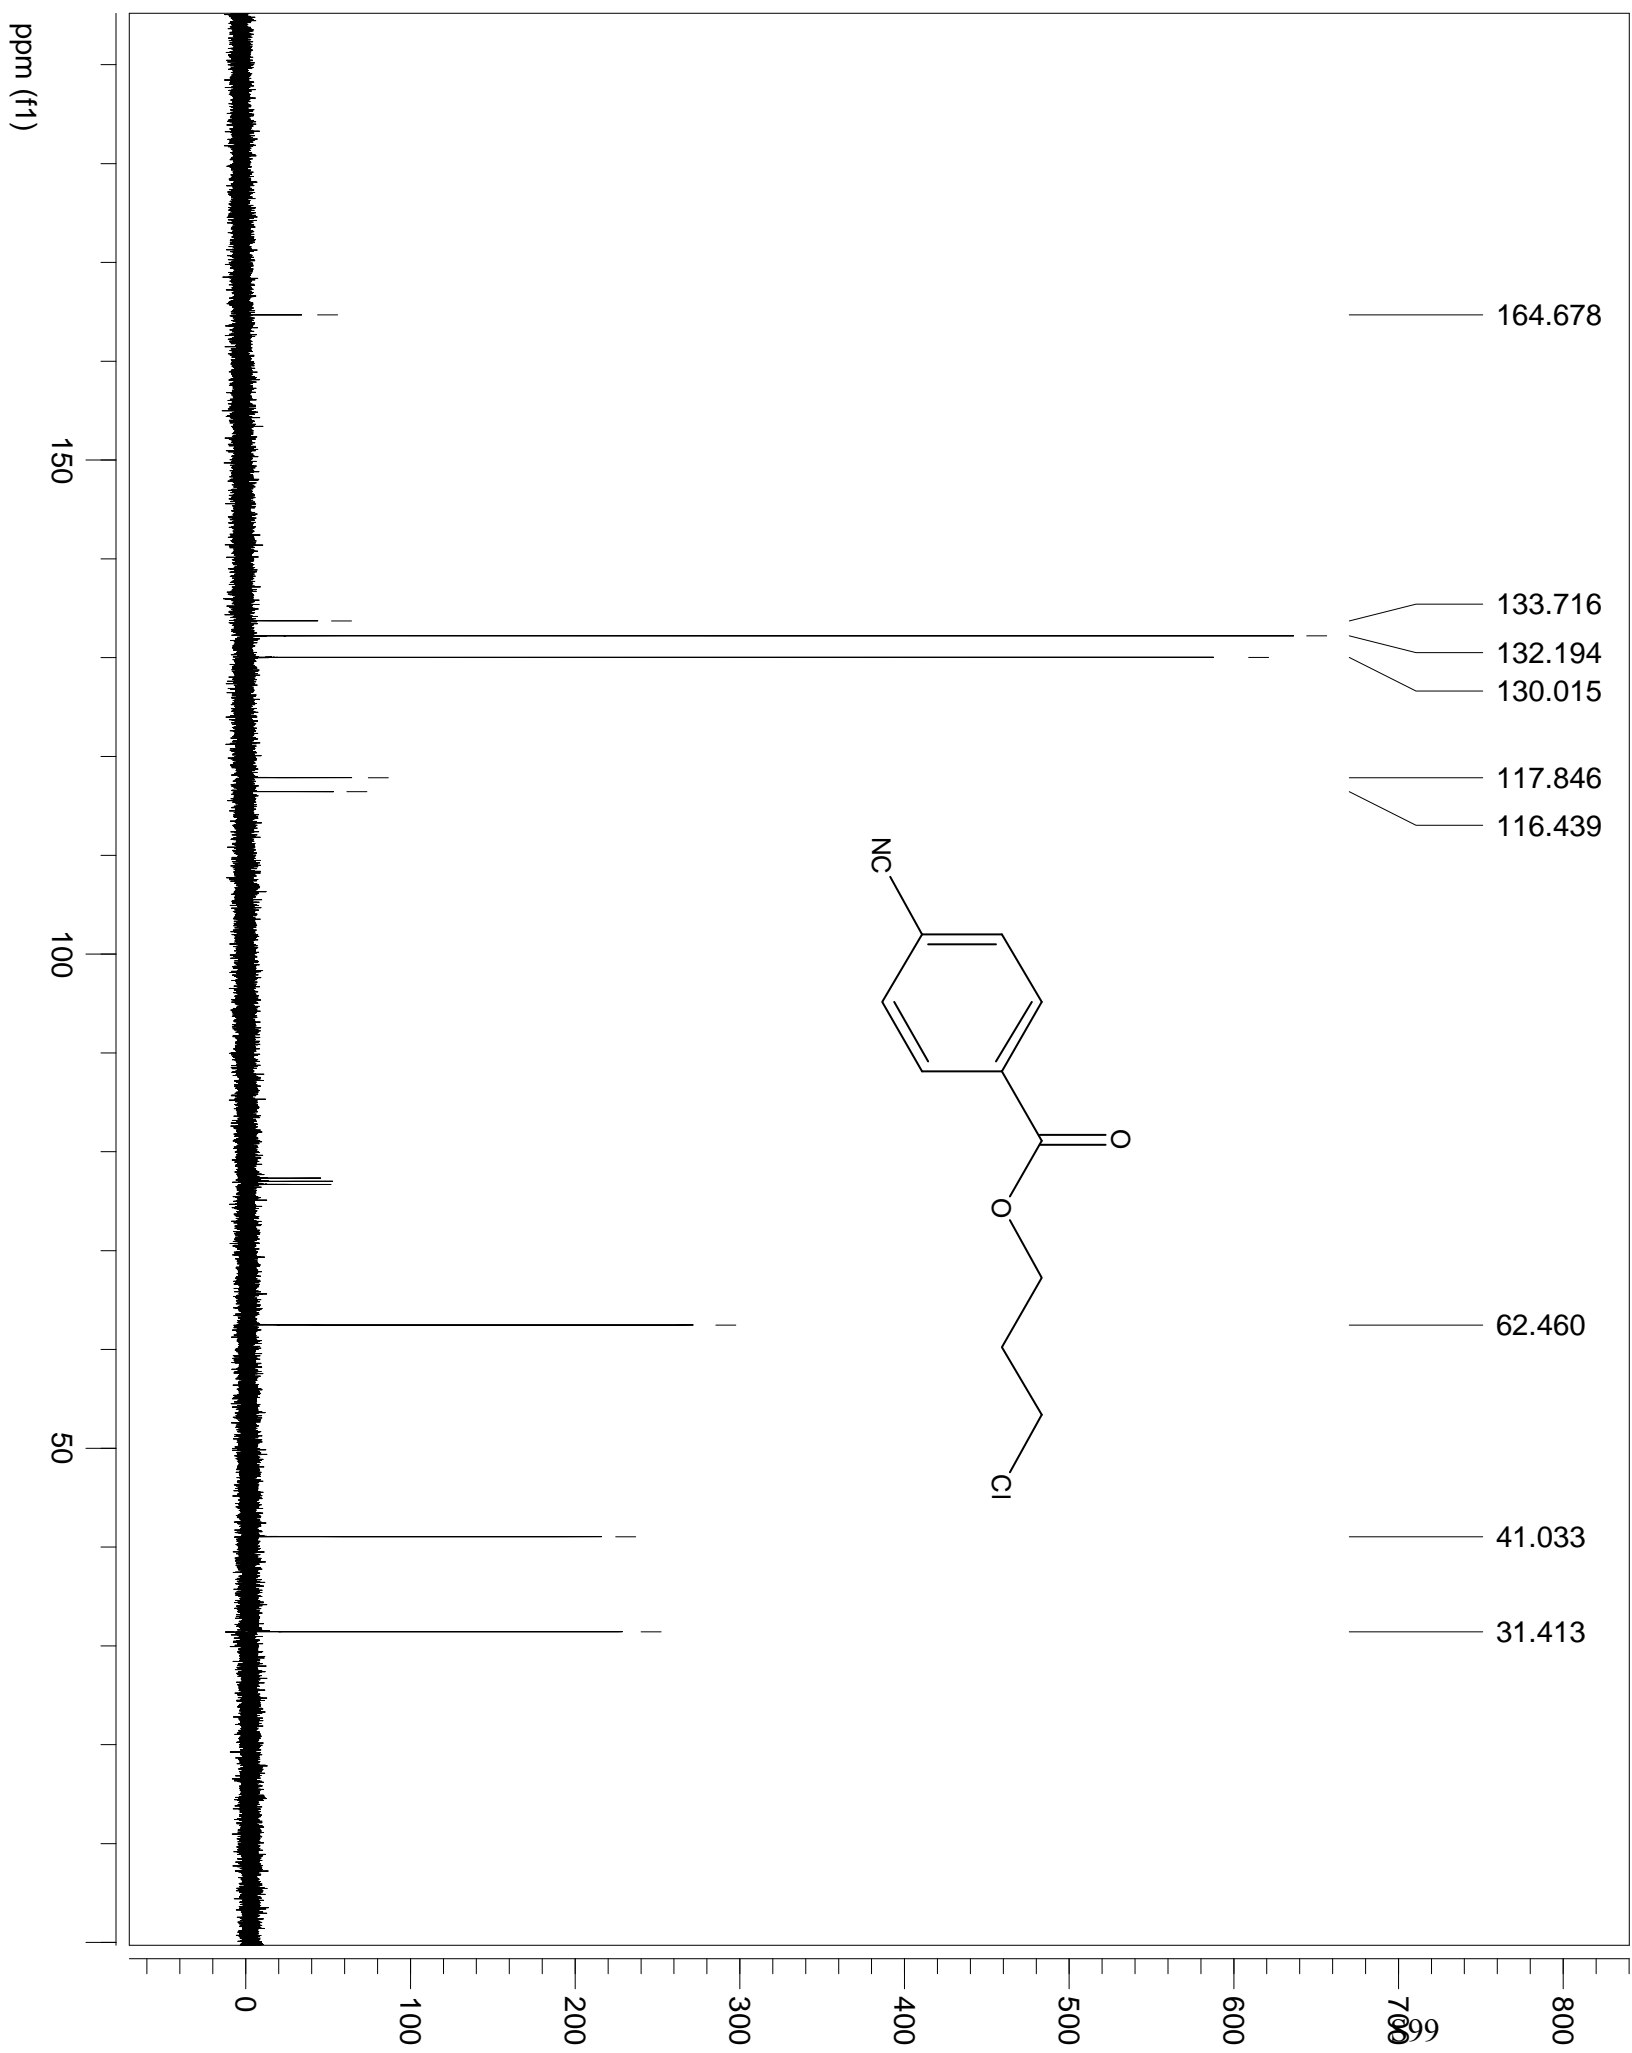

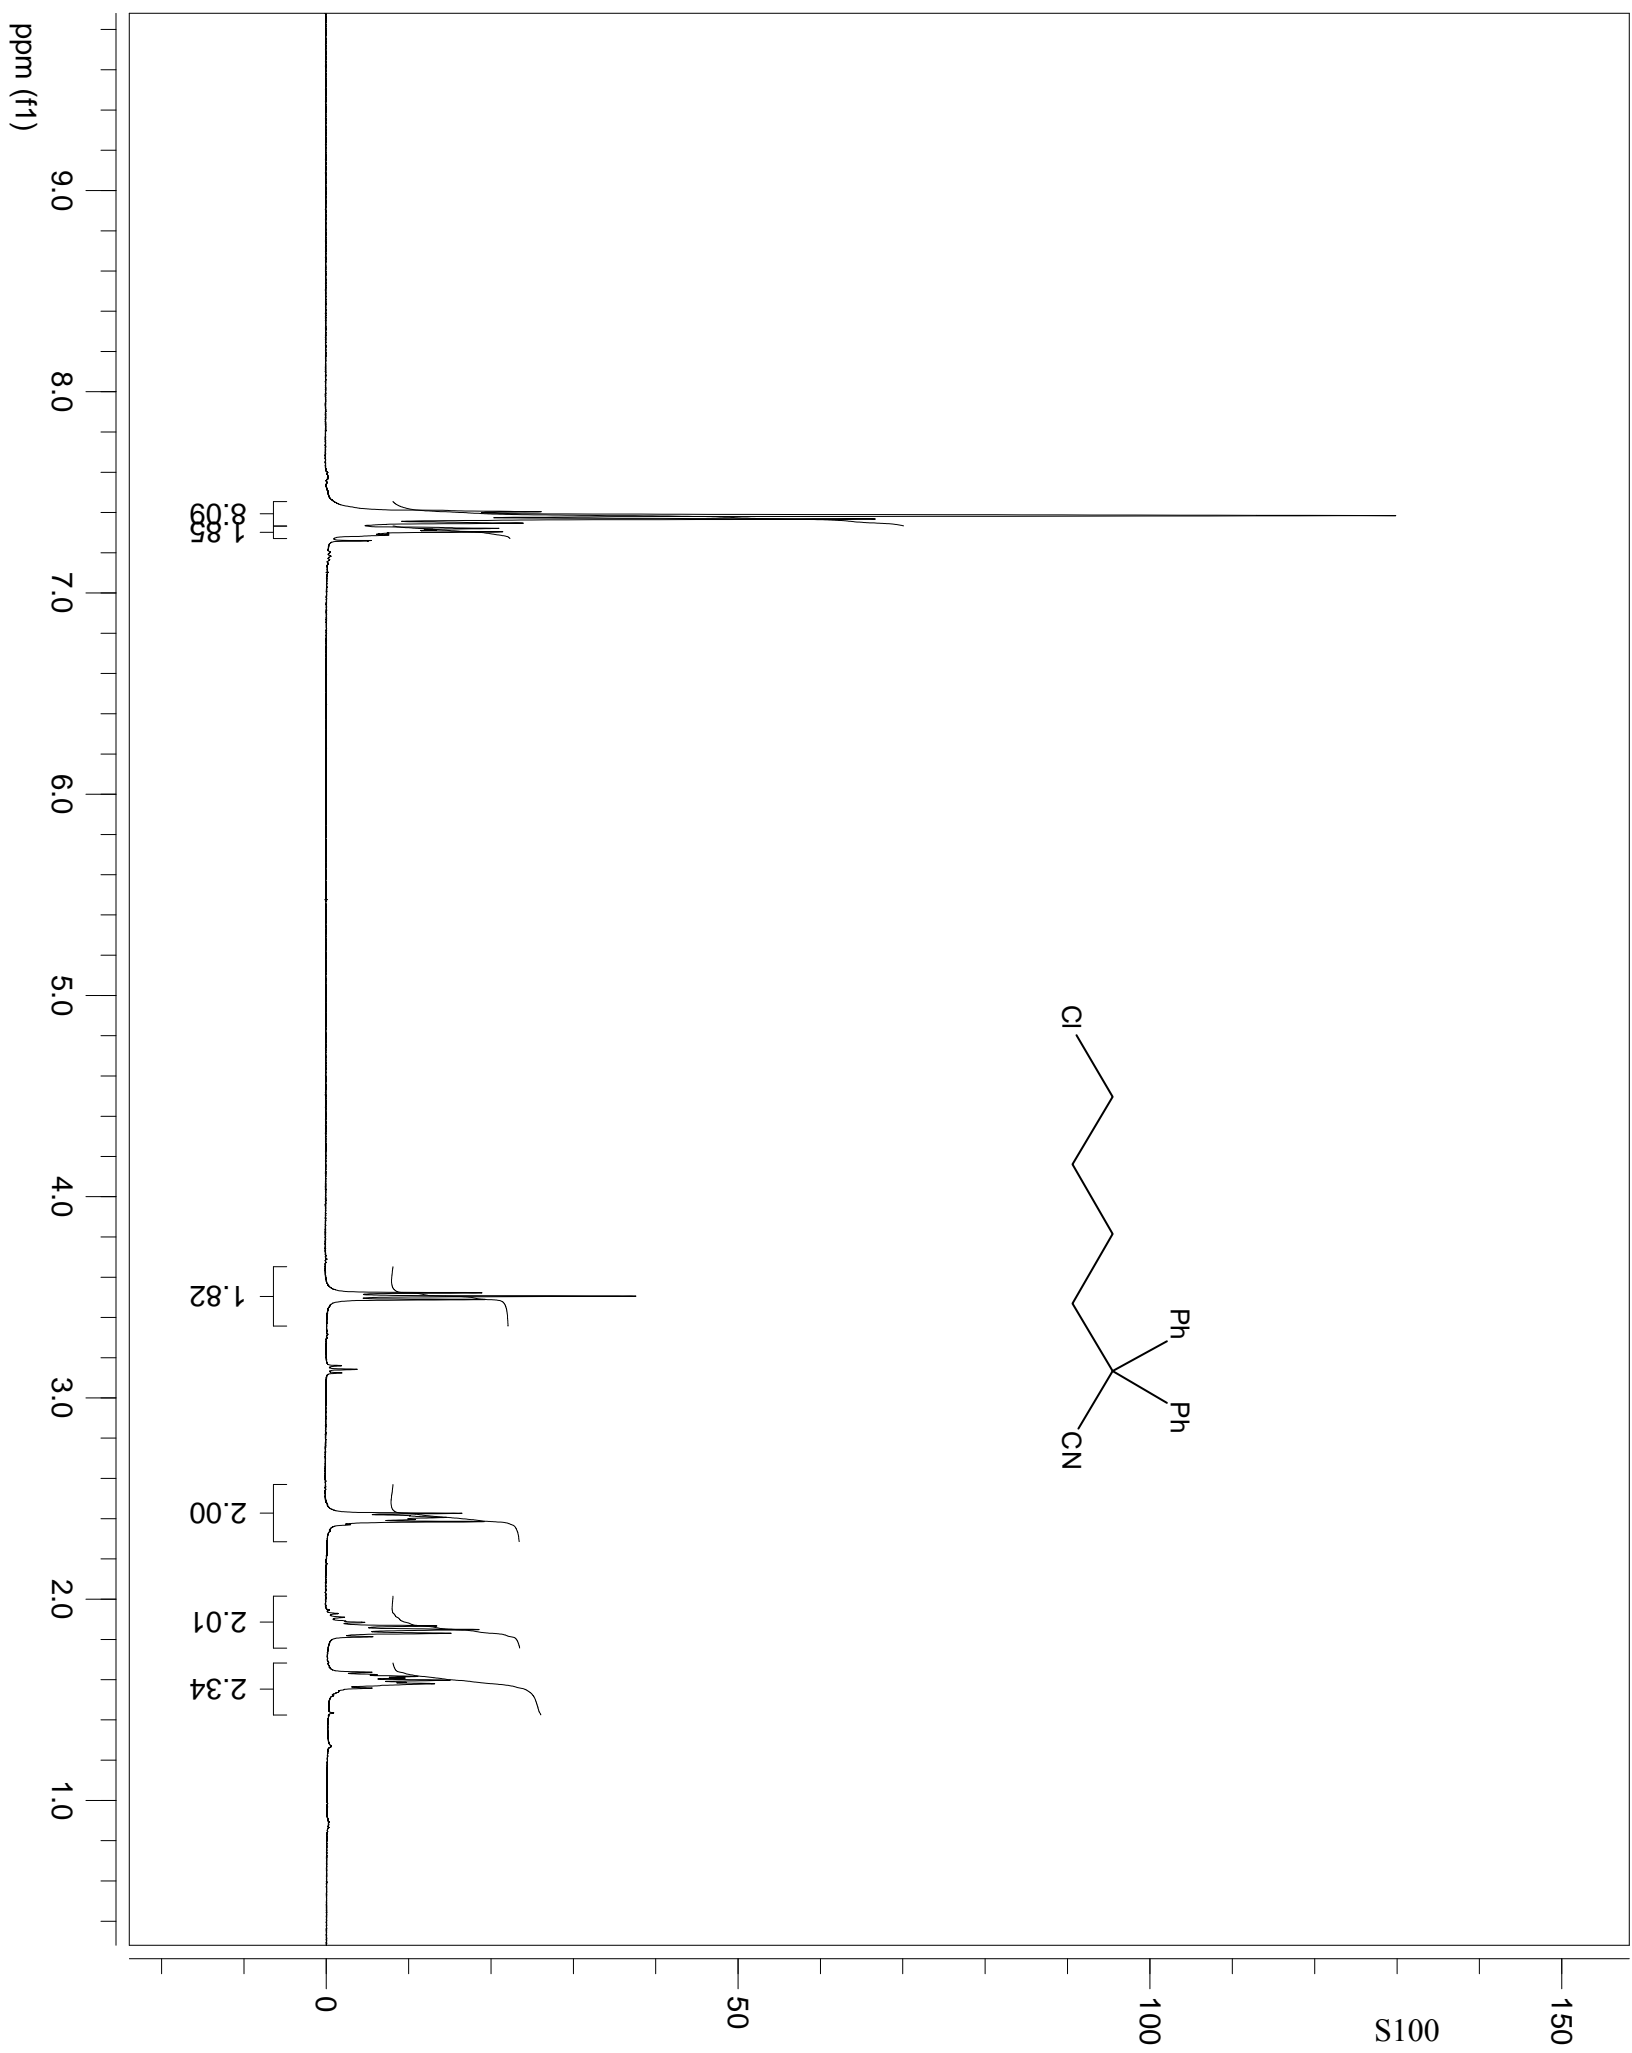



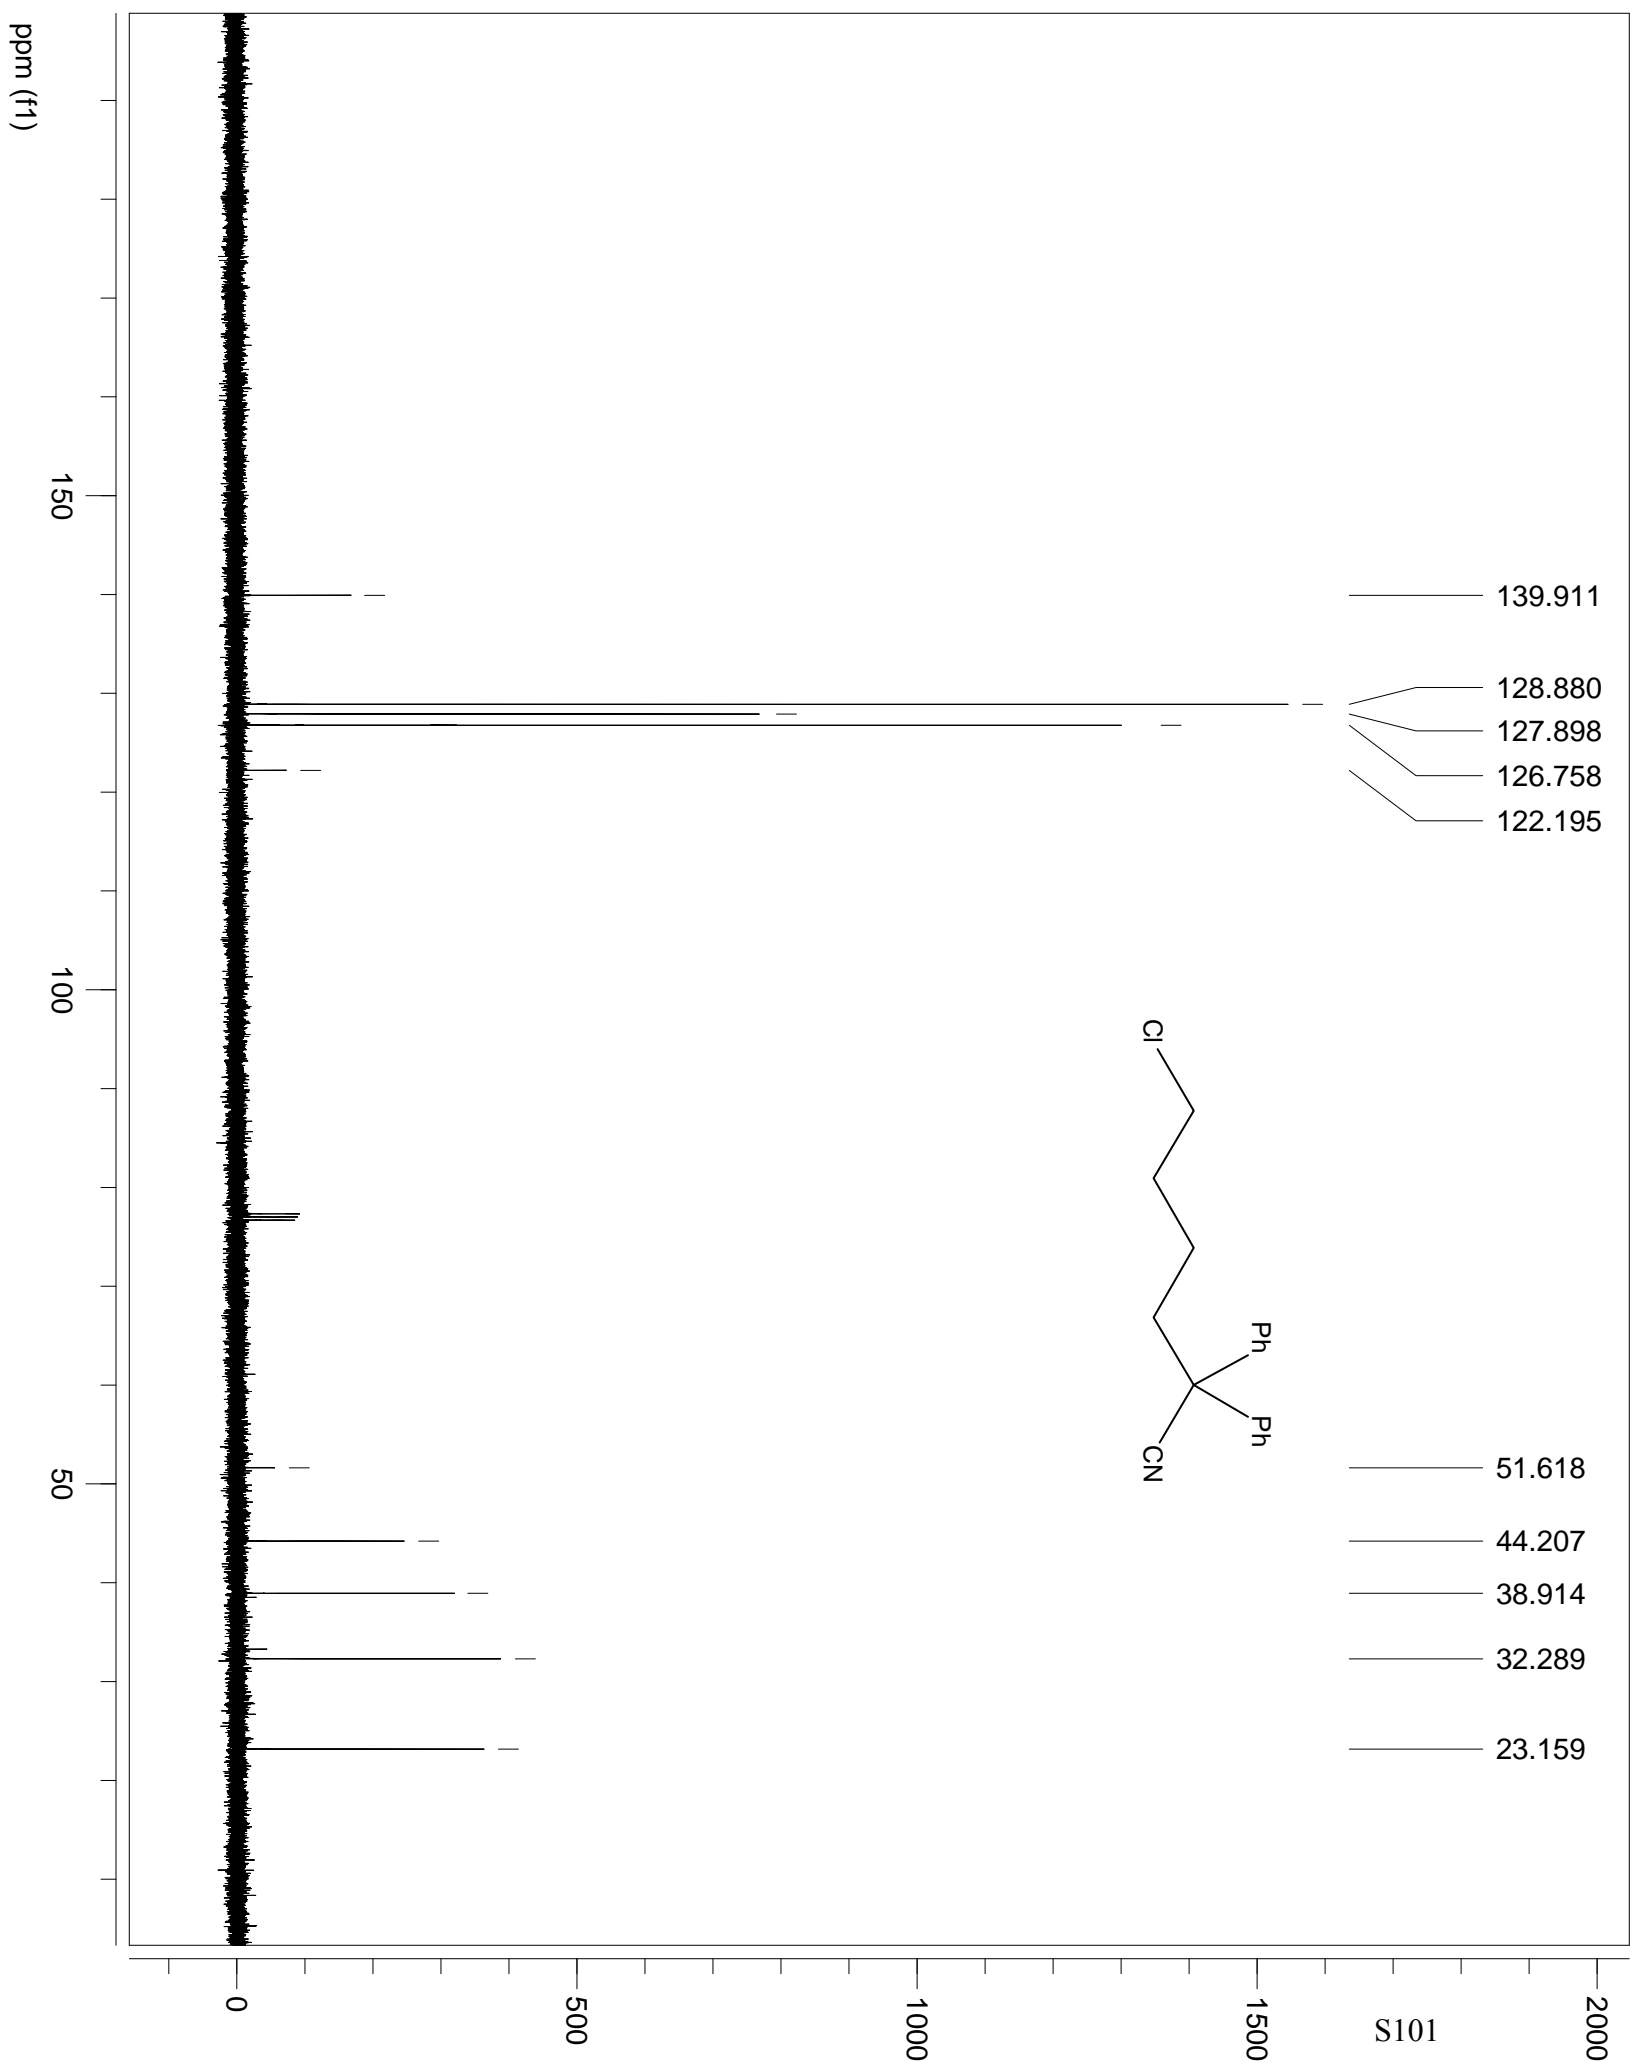

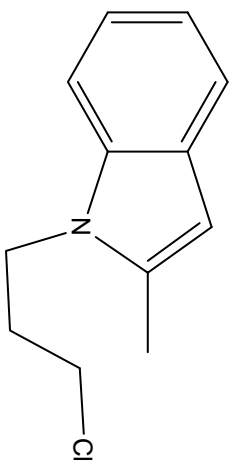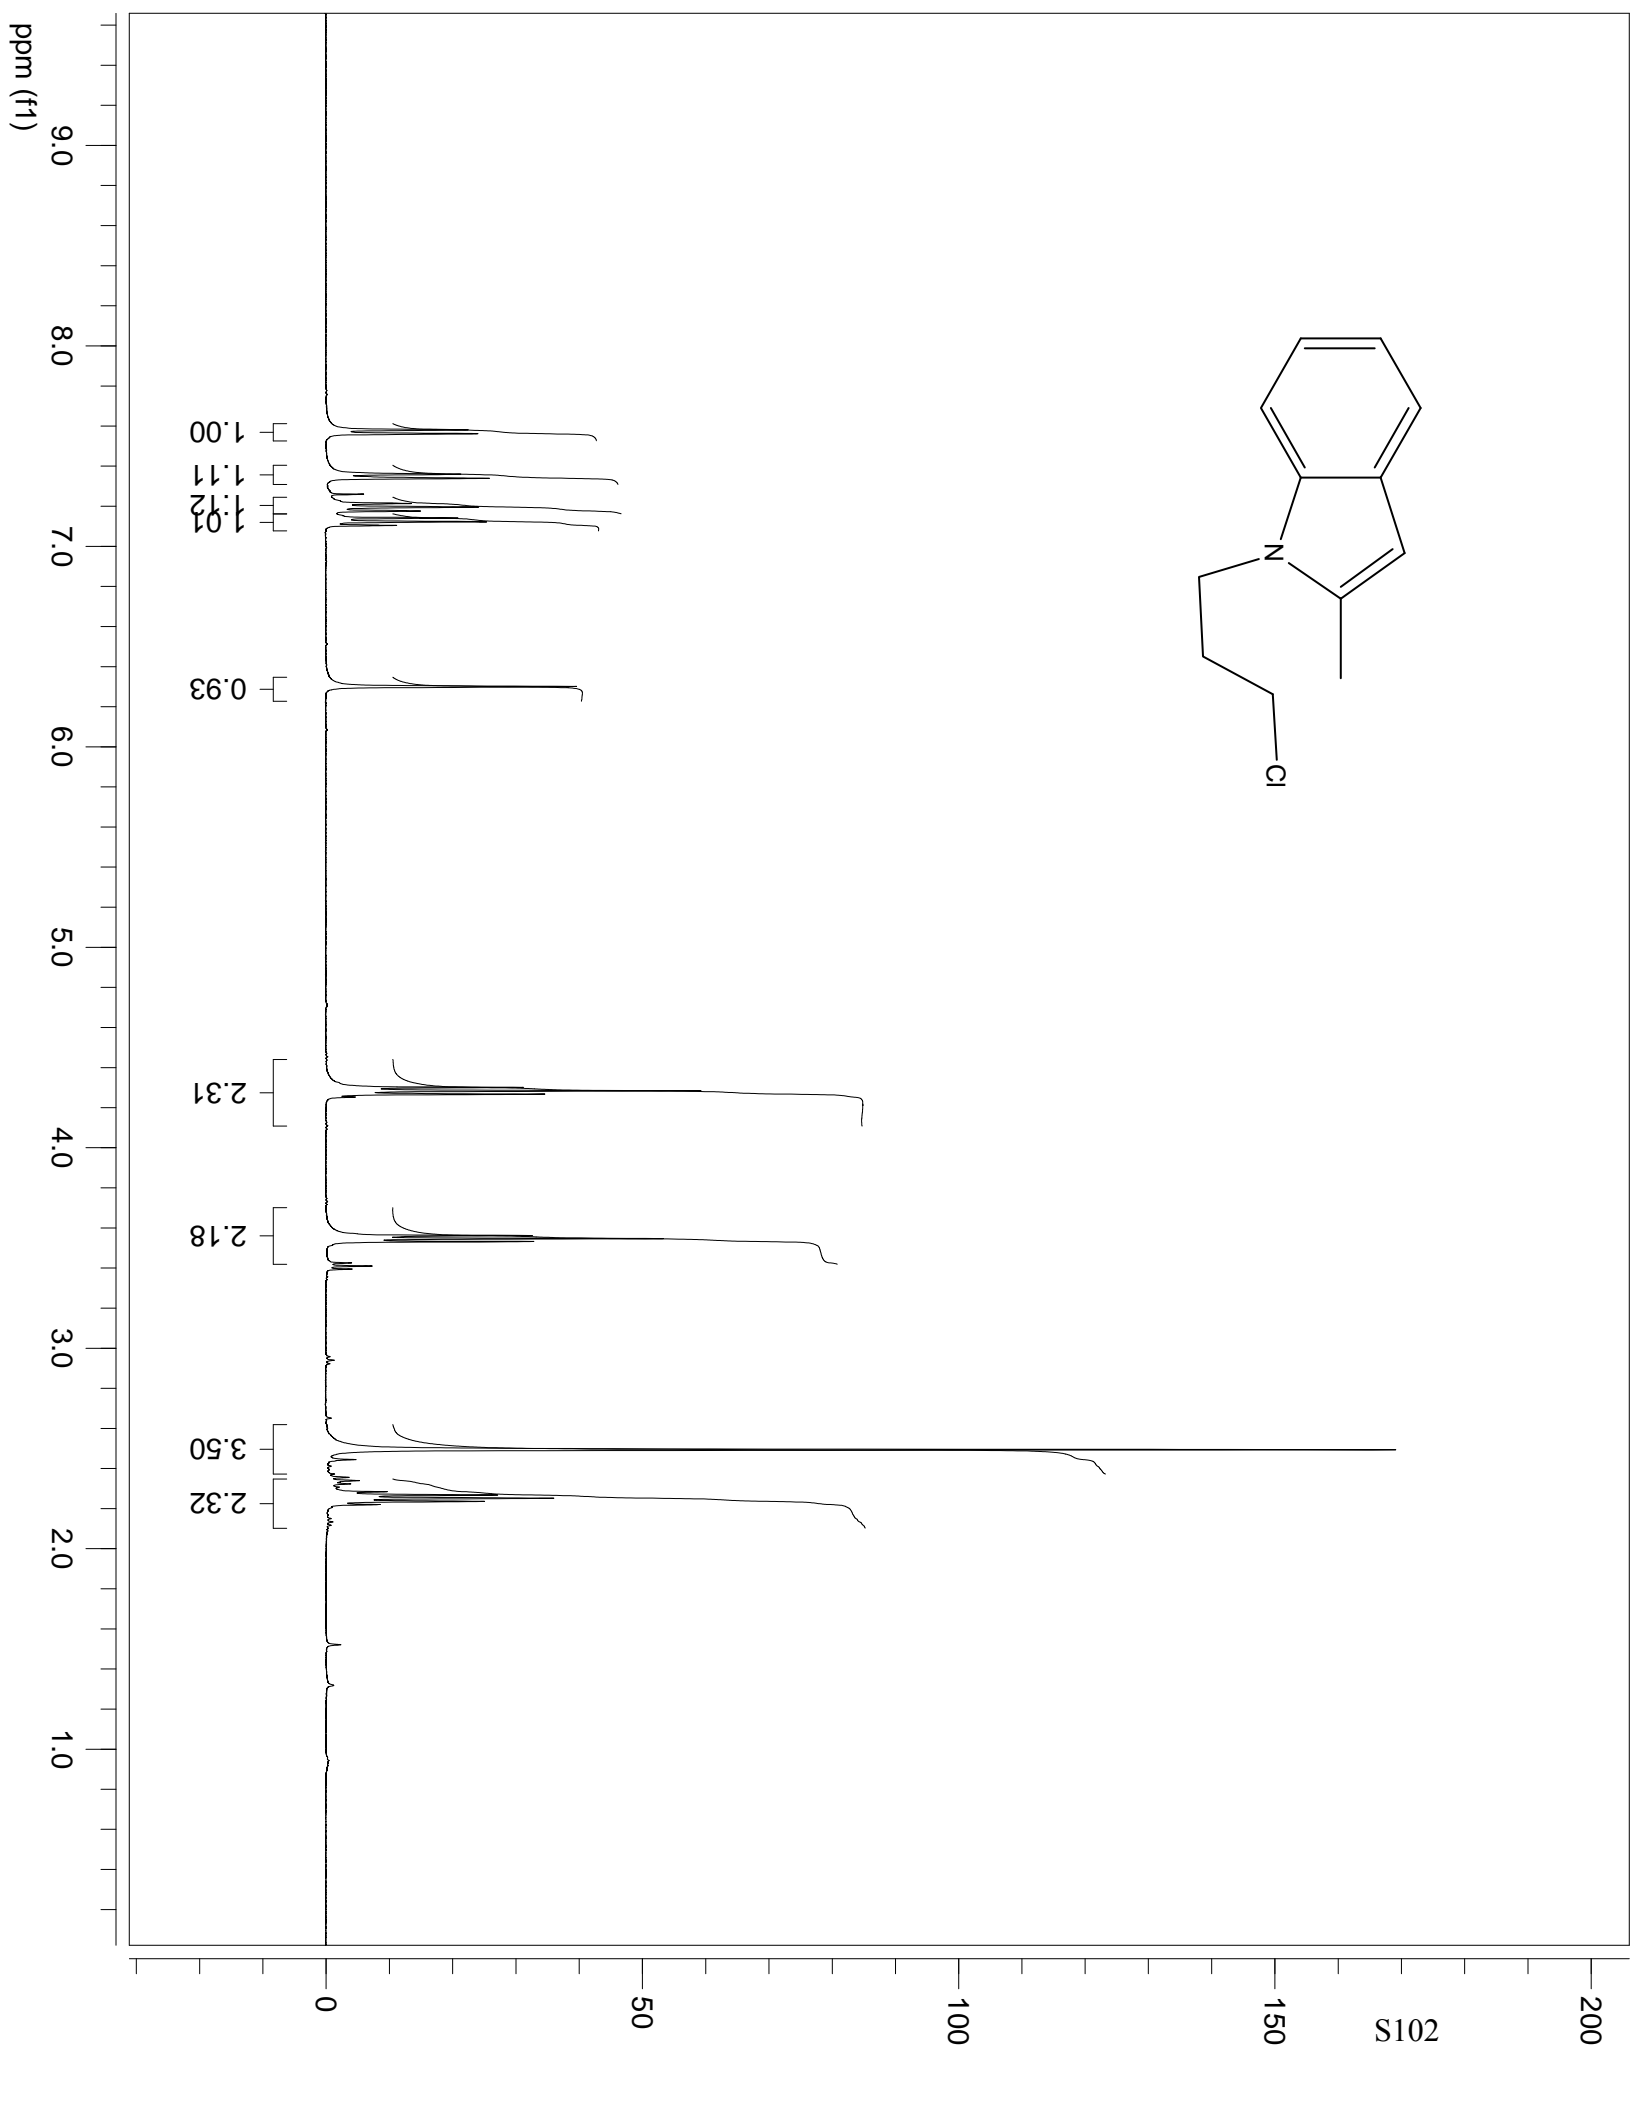

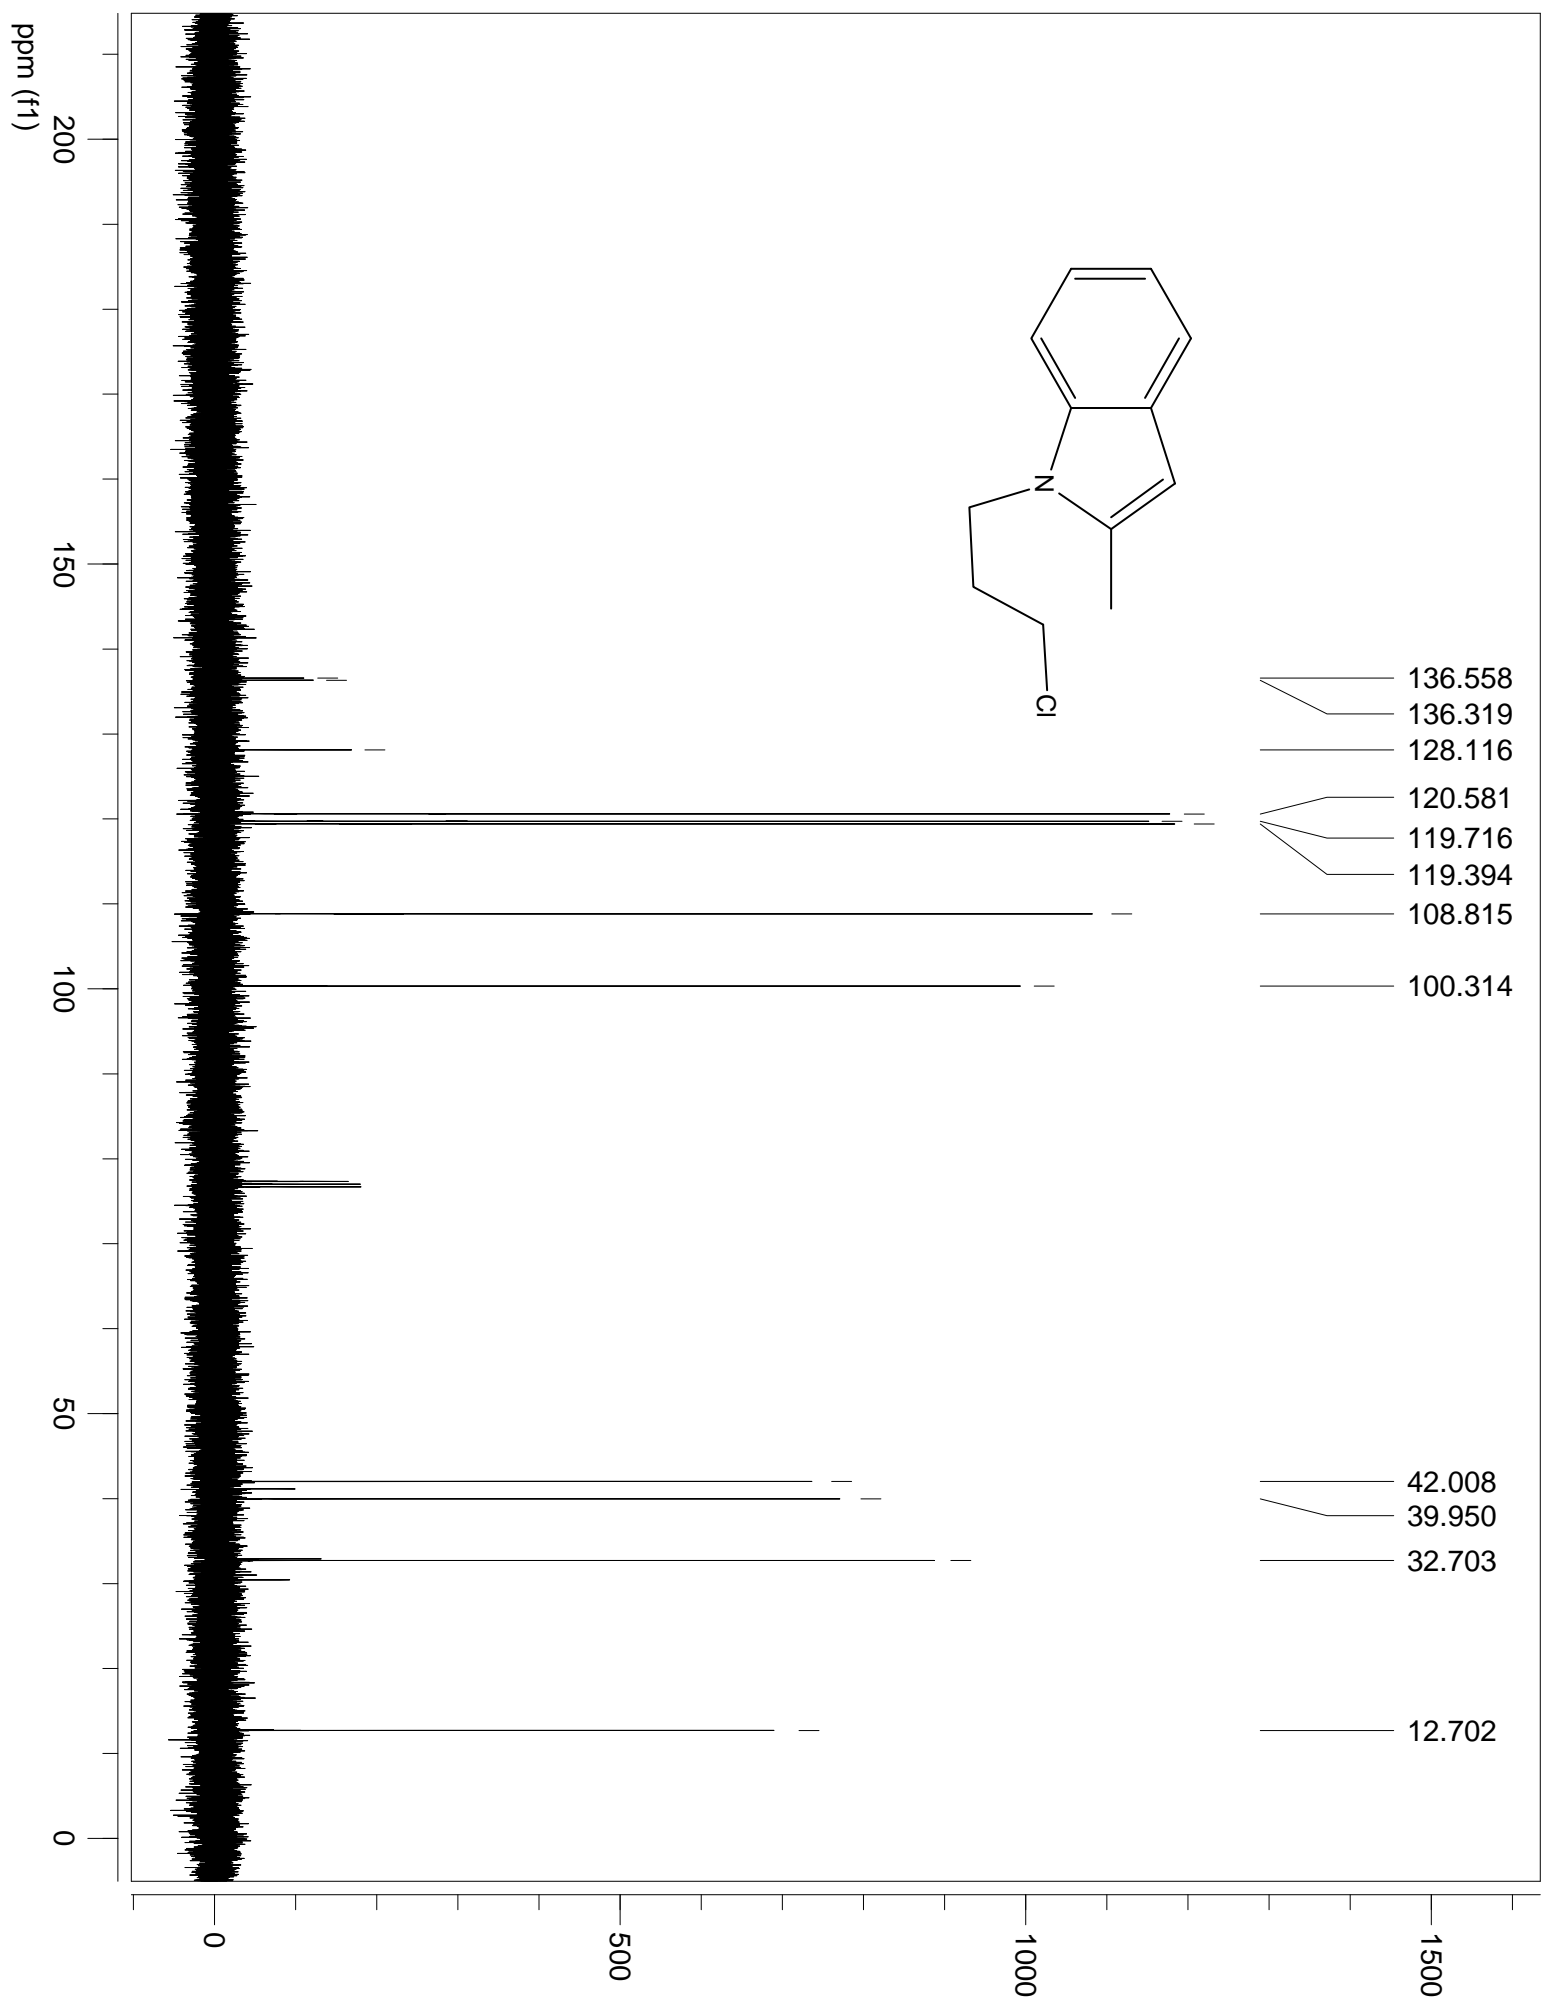

Supplement: Supplementary file 1 [file 4529293]
